# Supplementary material for: Regulation of soldier caste differentiation by microRNAs in Formosan subterranean termite (Coptotermes formosanus Shiraki)
Source: PeerJ journal article supplement (doi:10.7717/peerj.16843), 2024-02-29

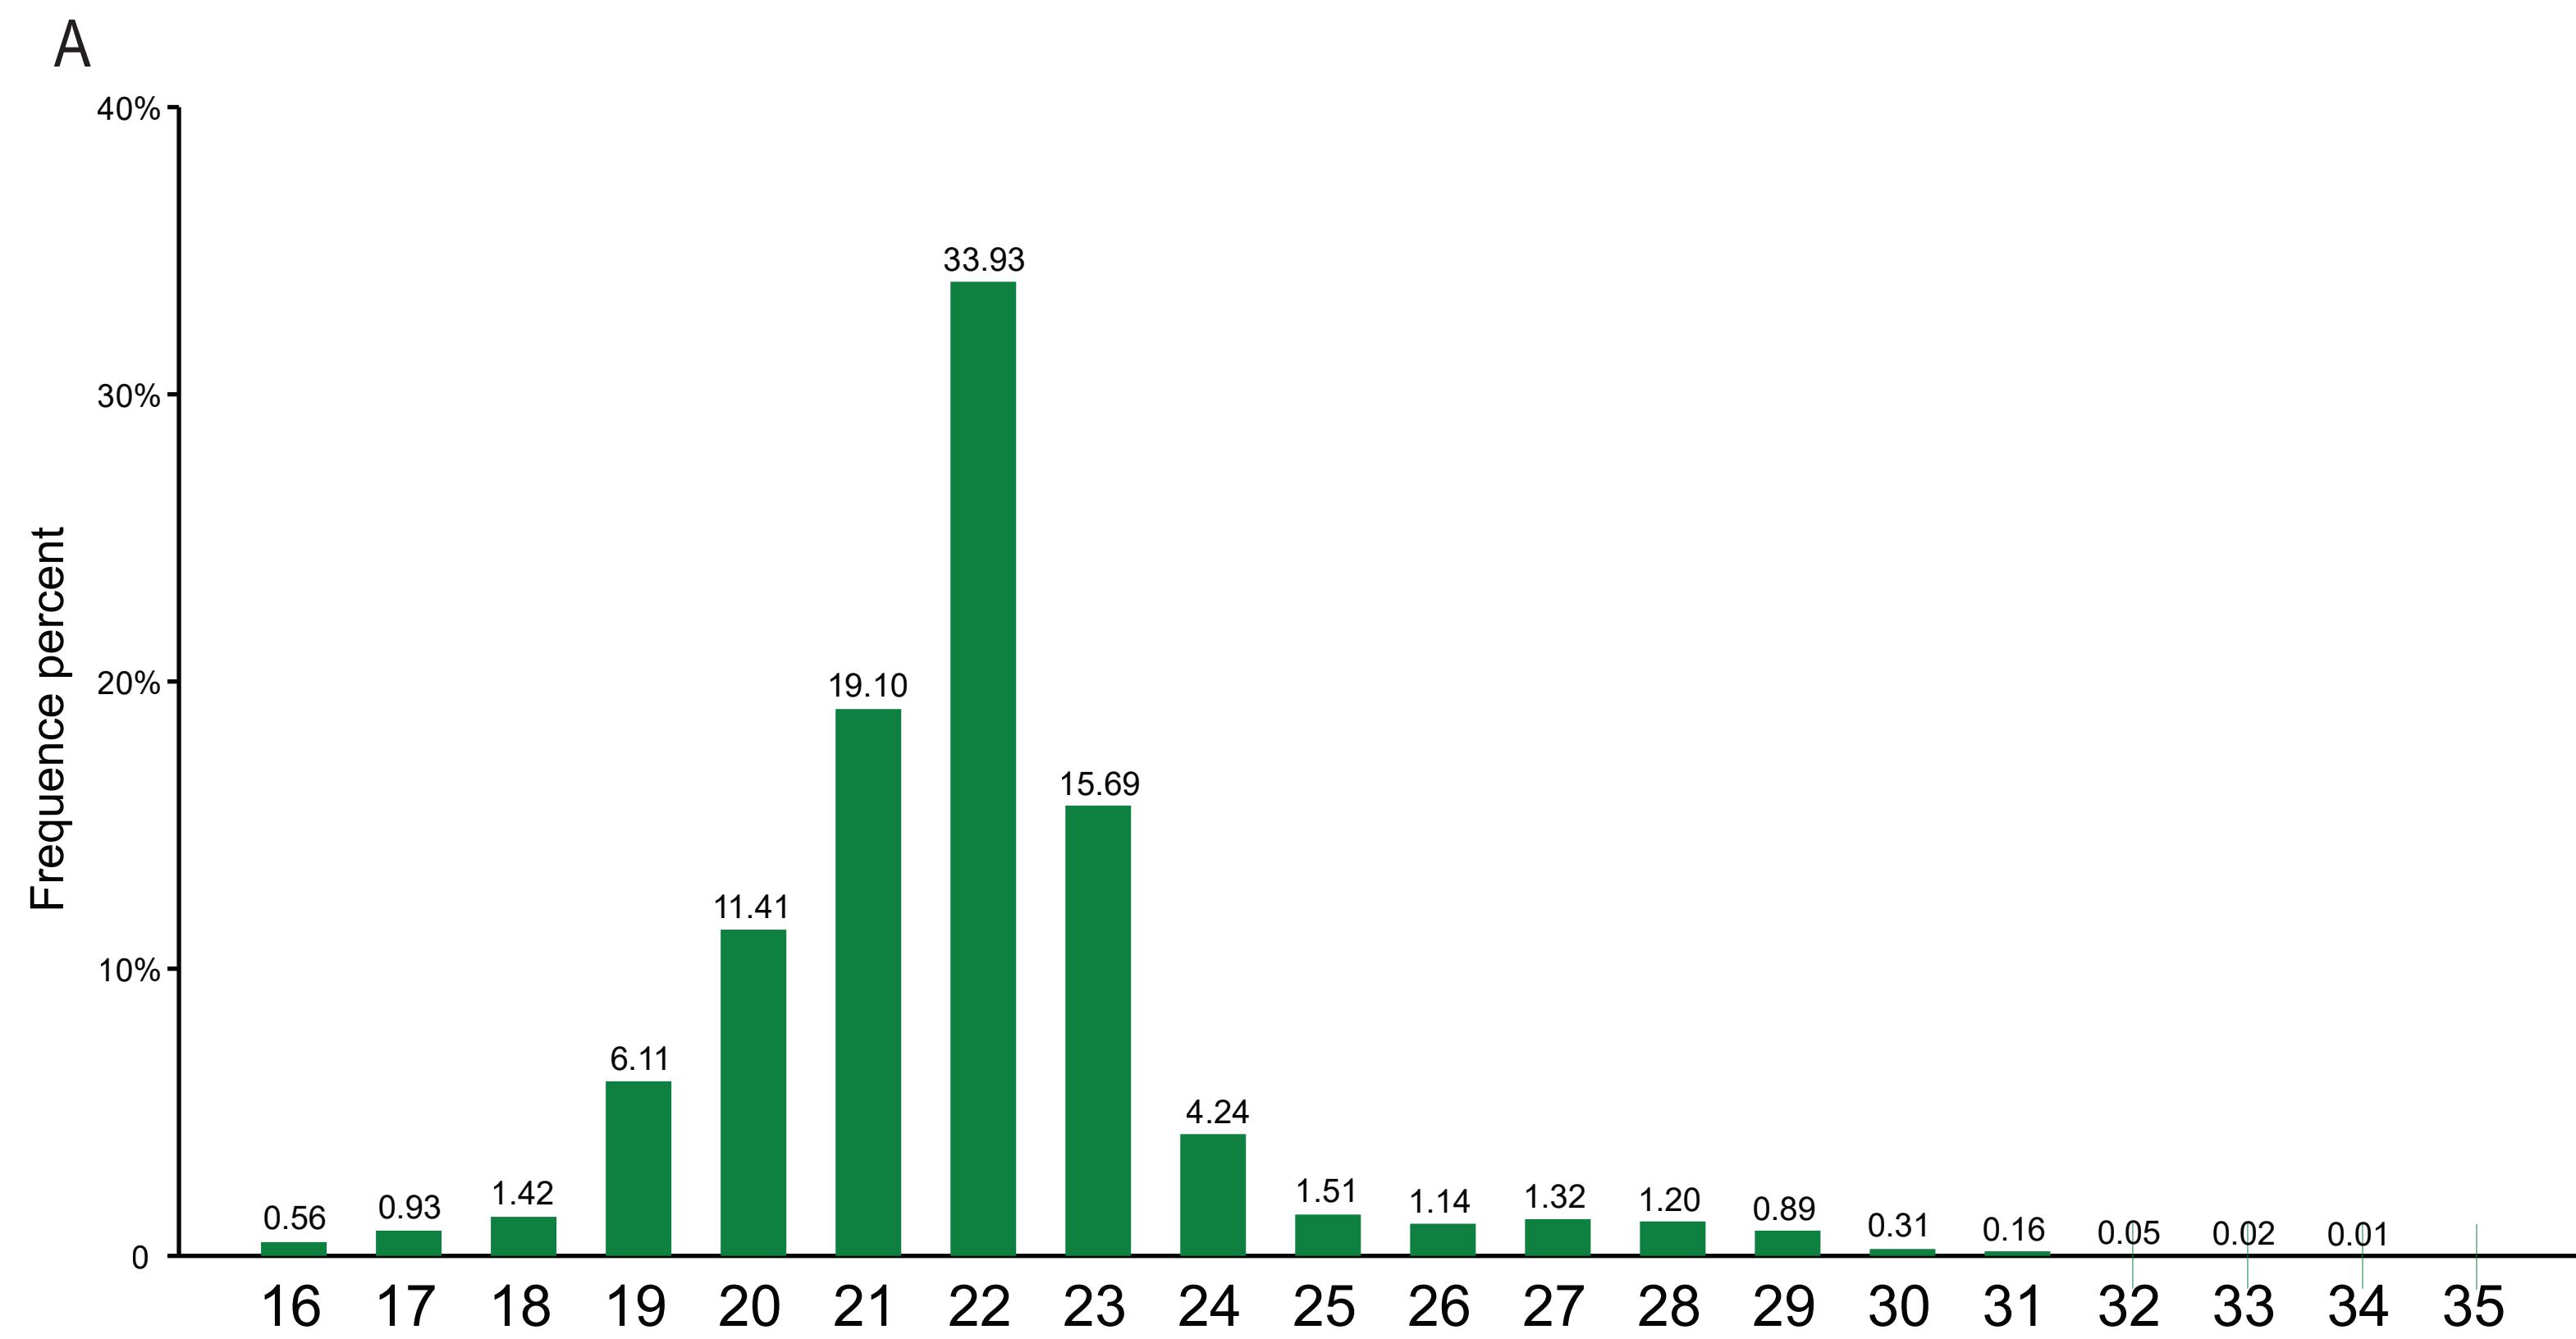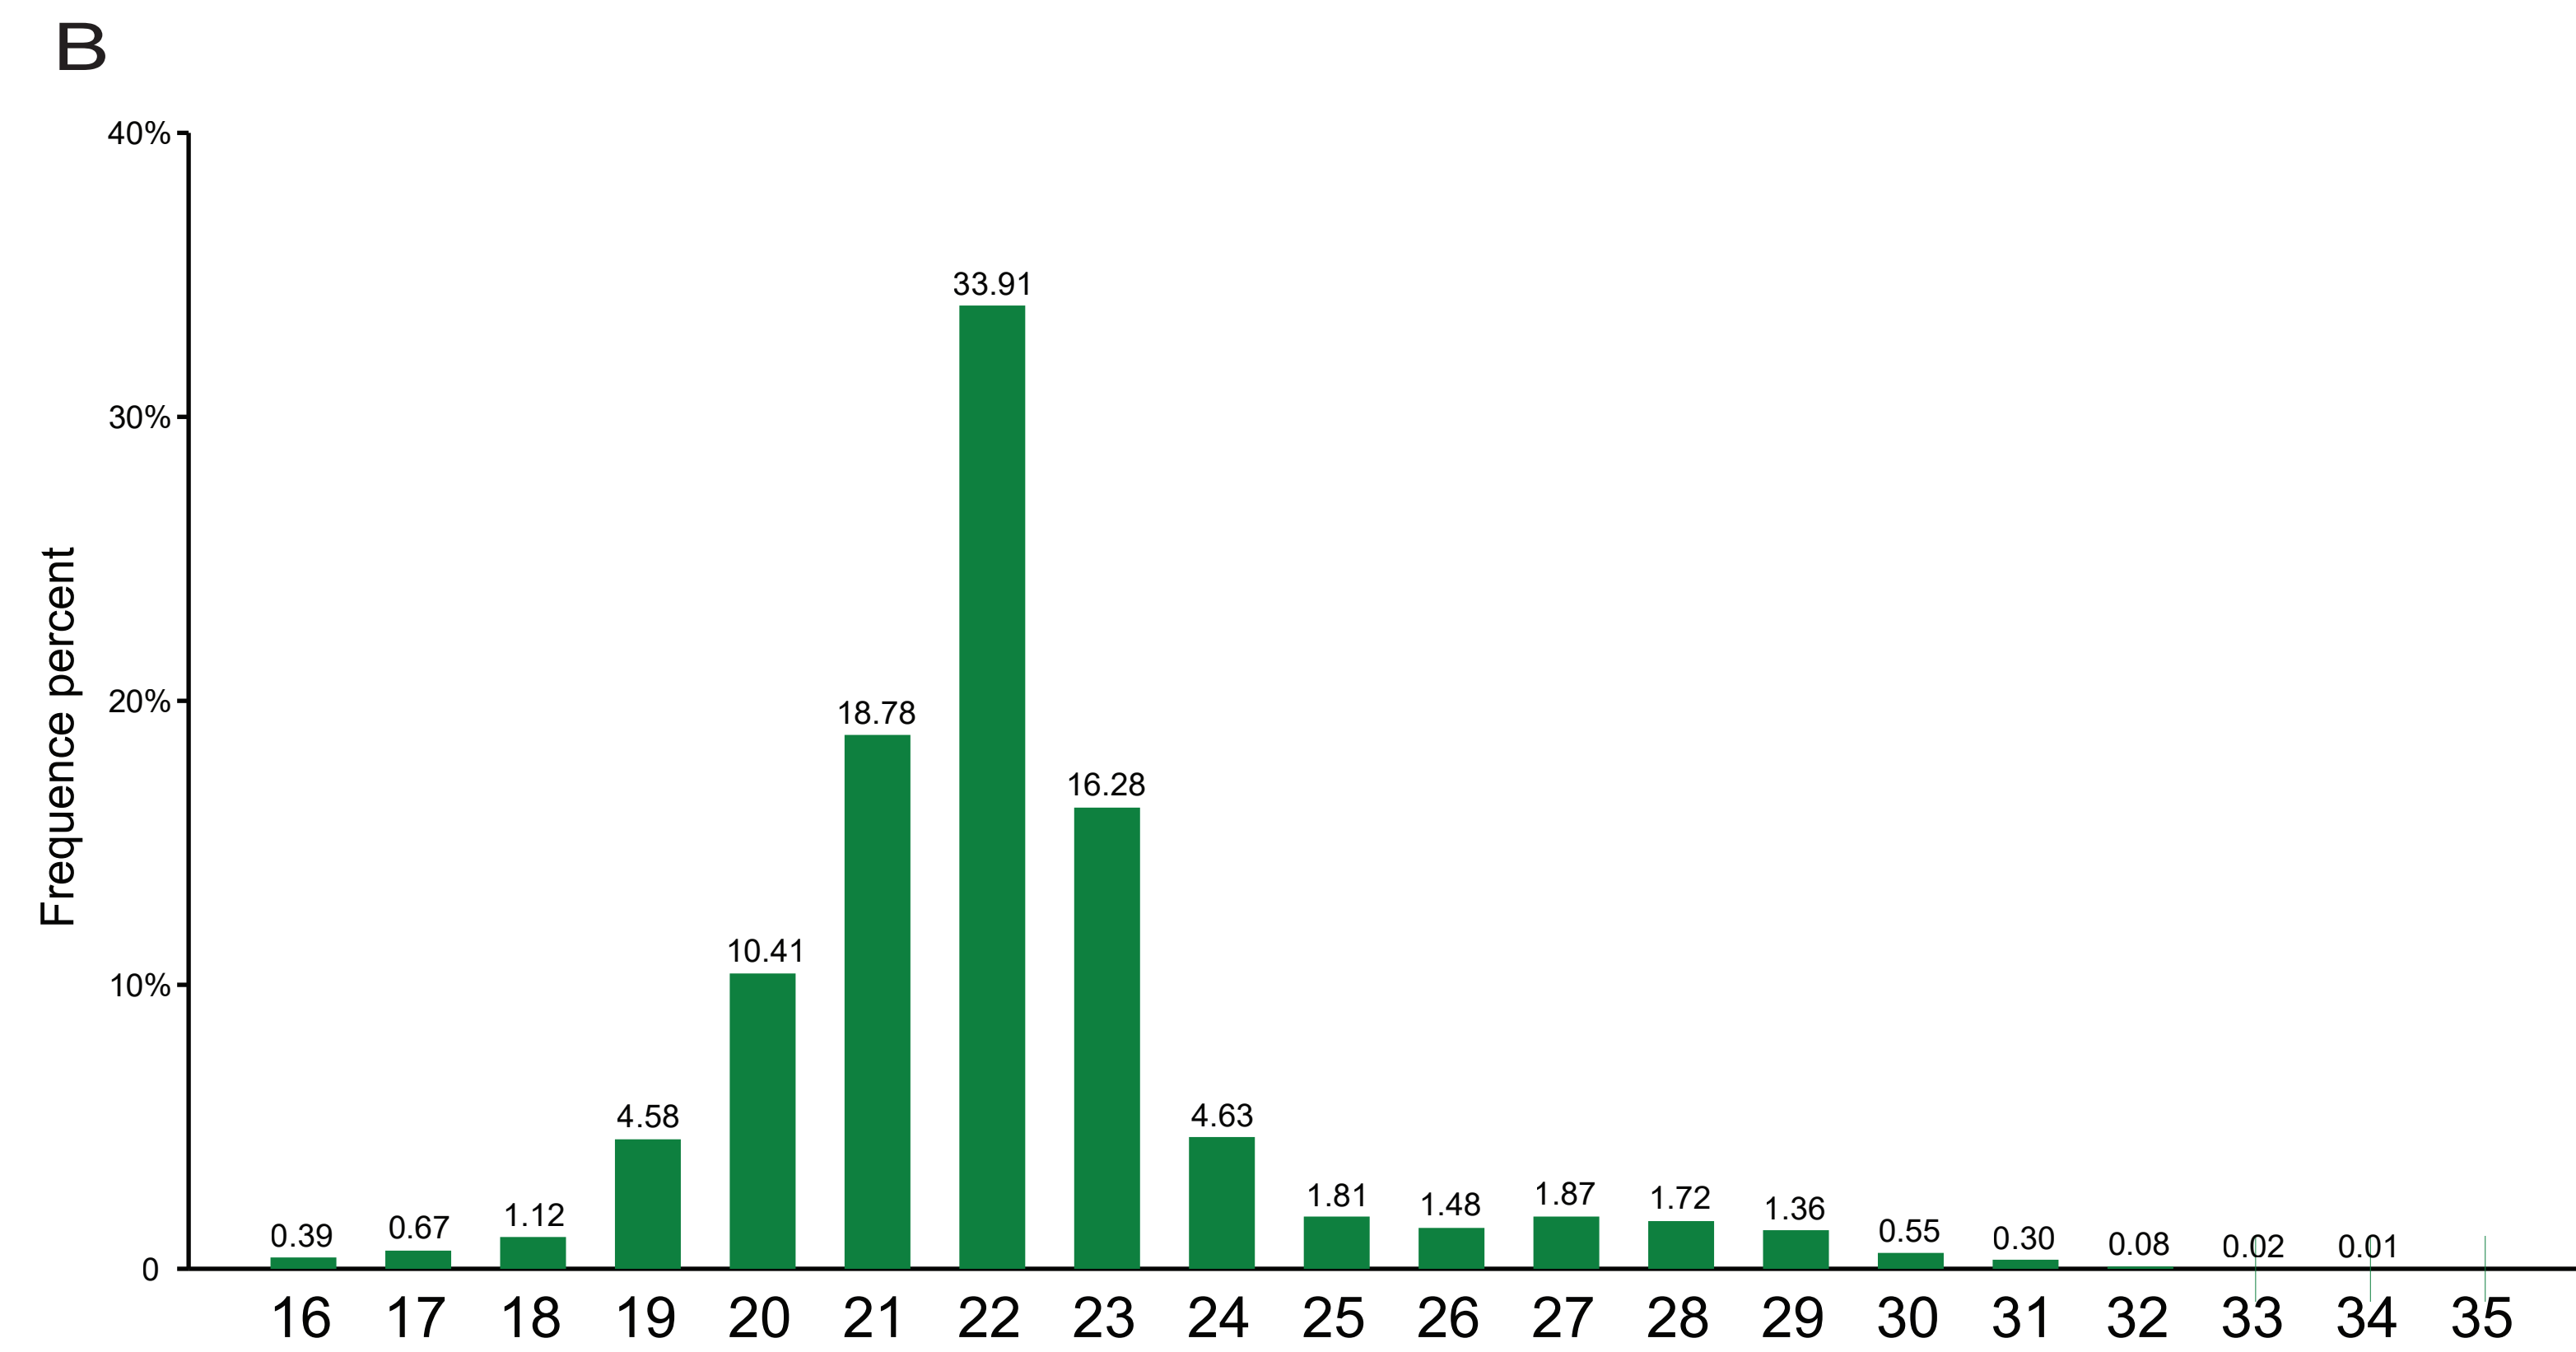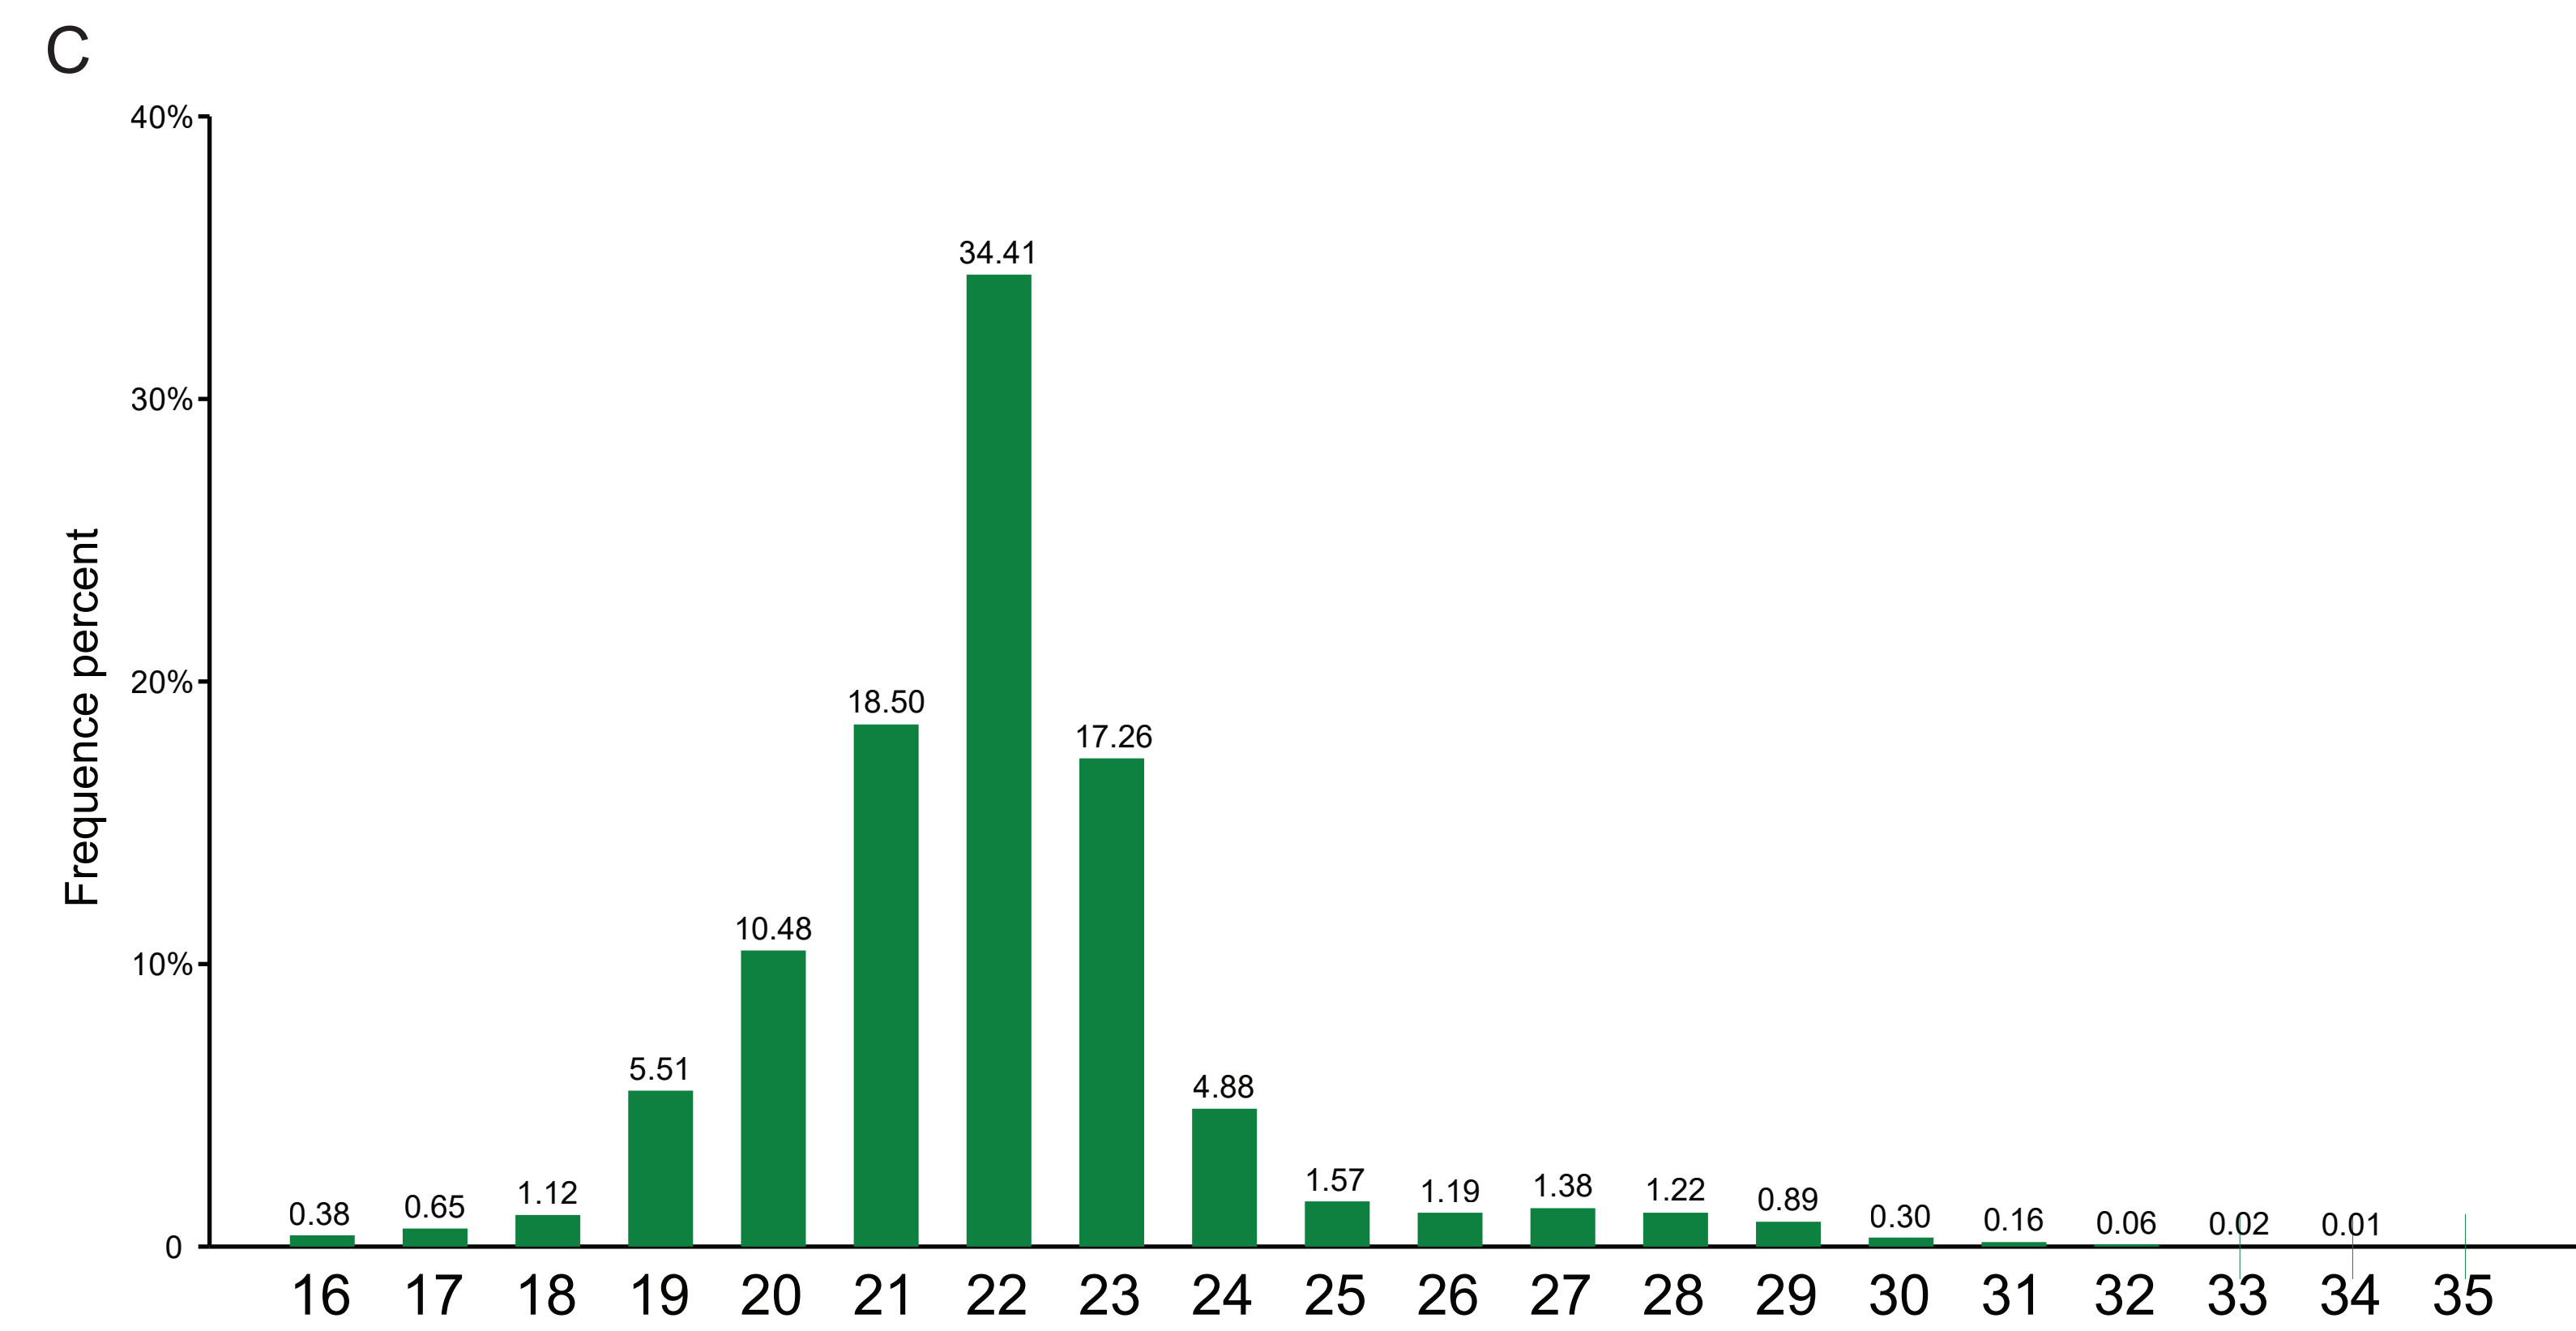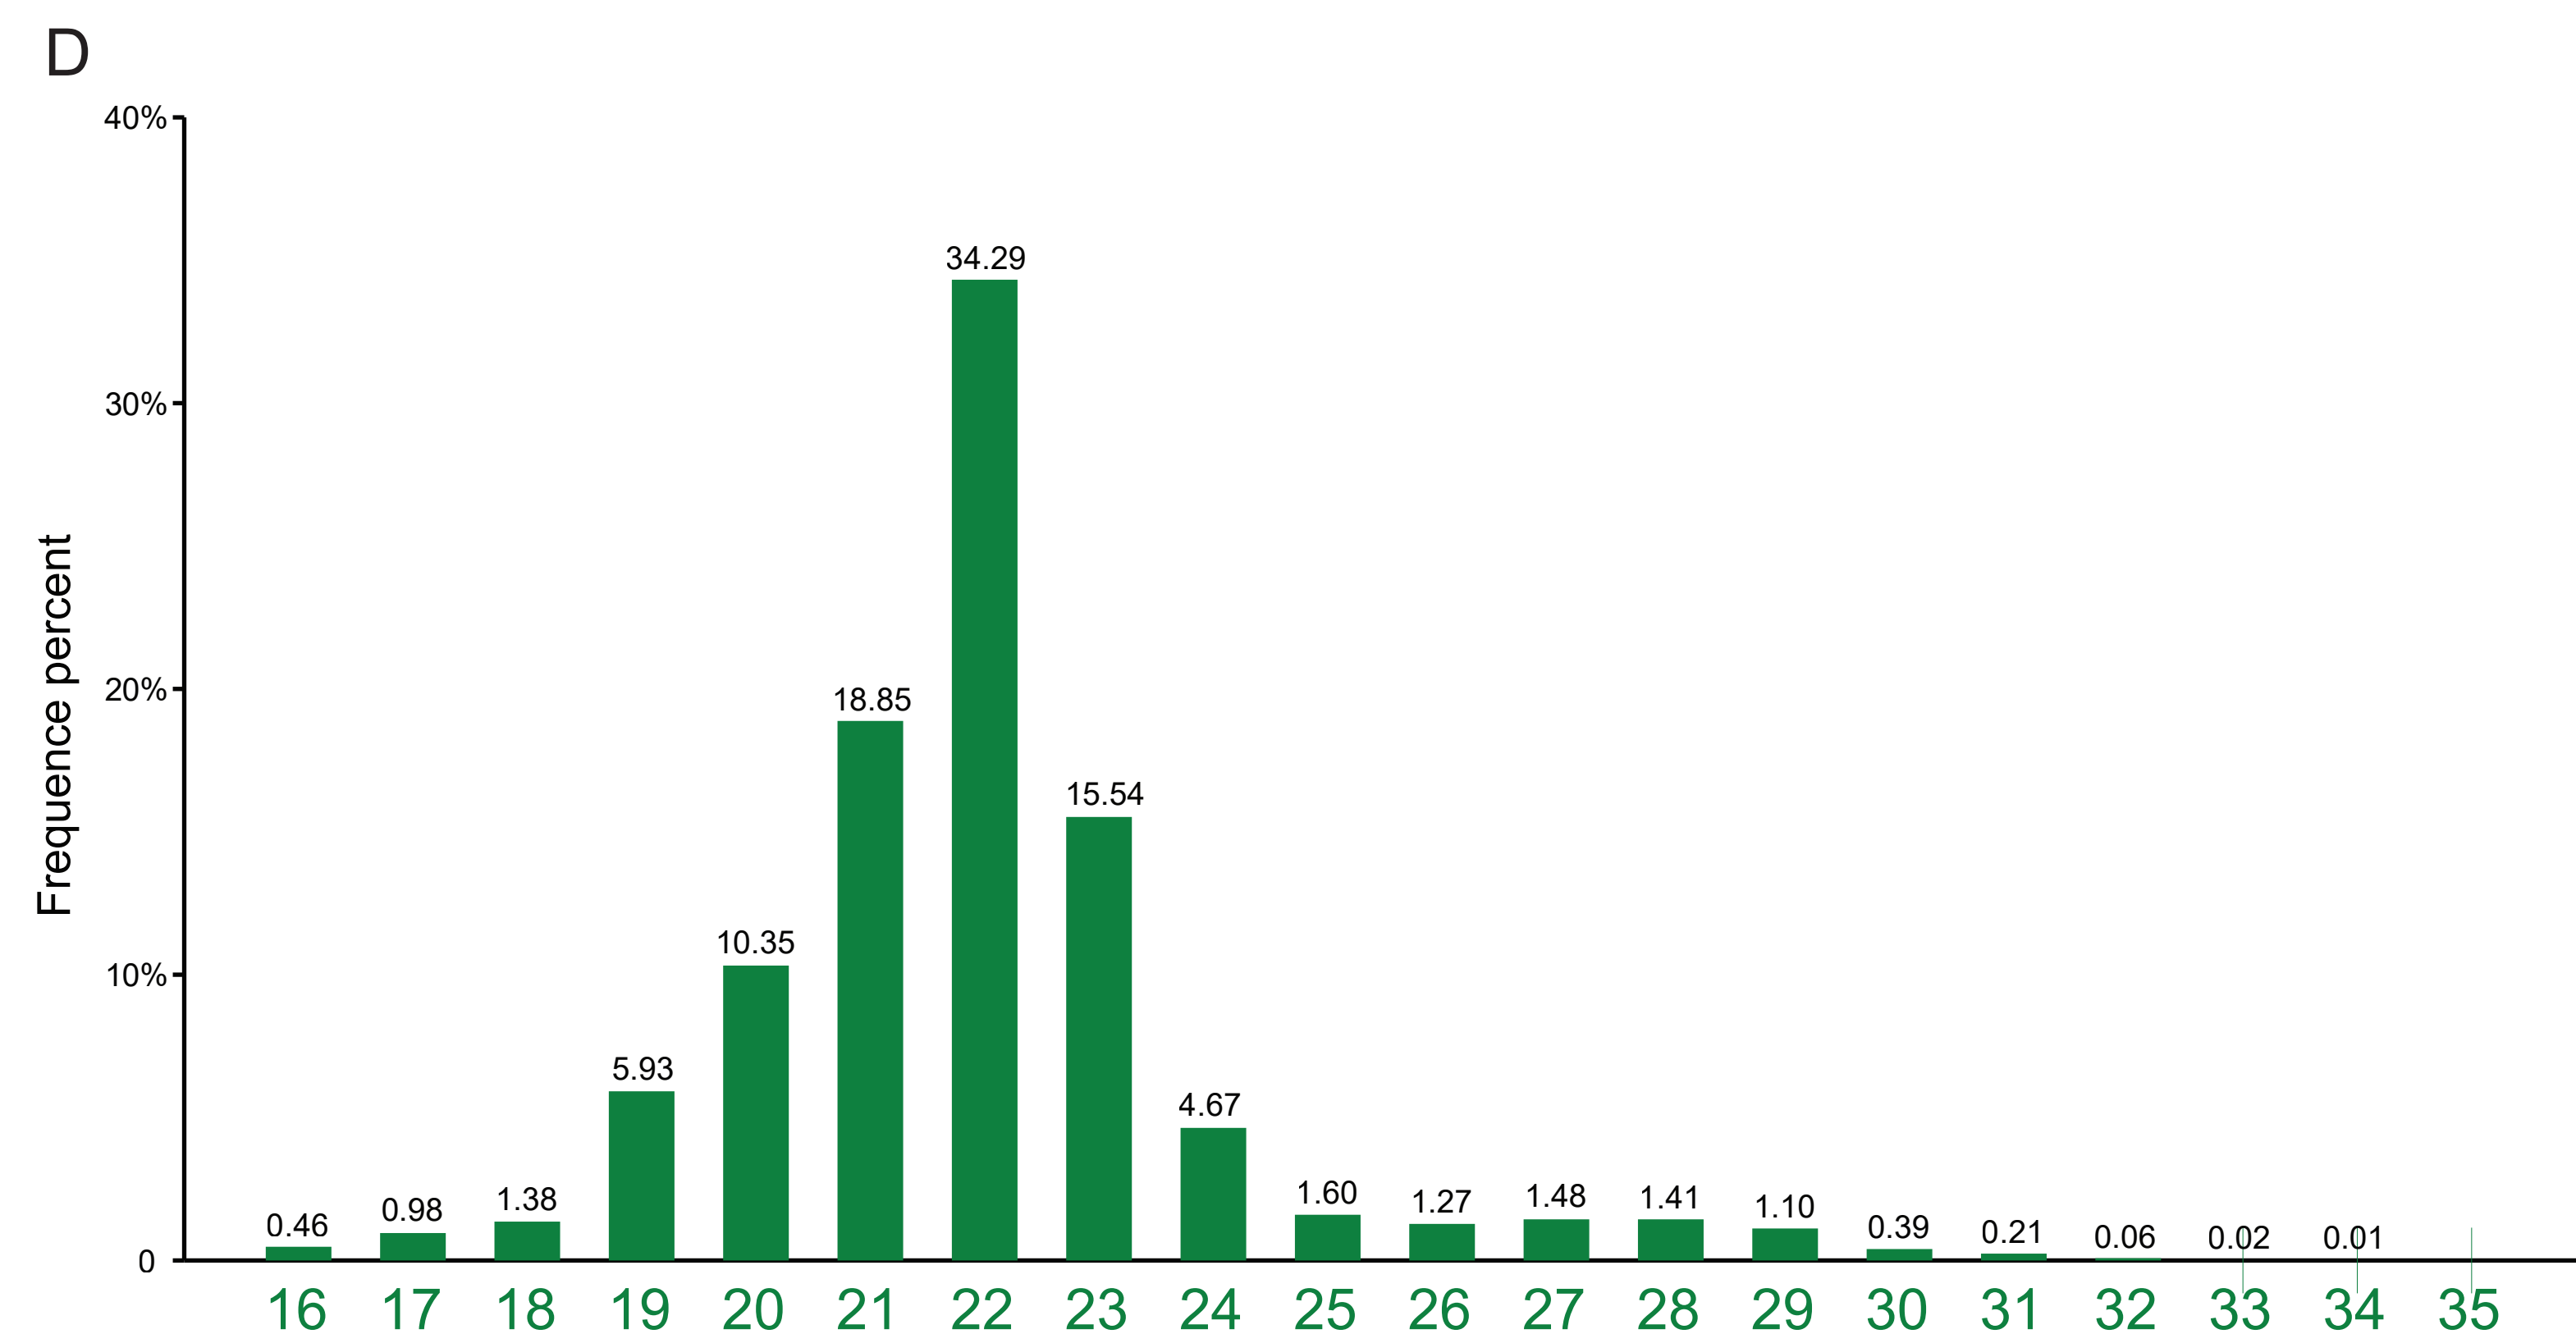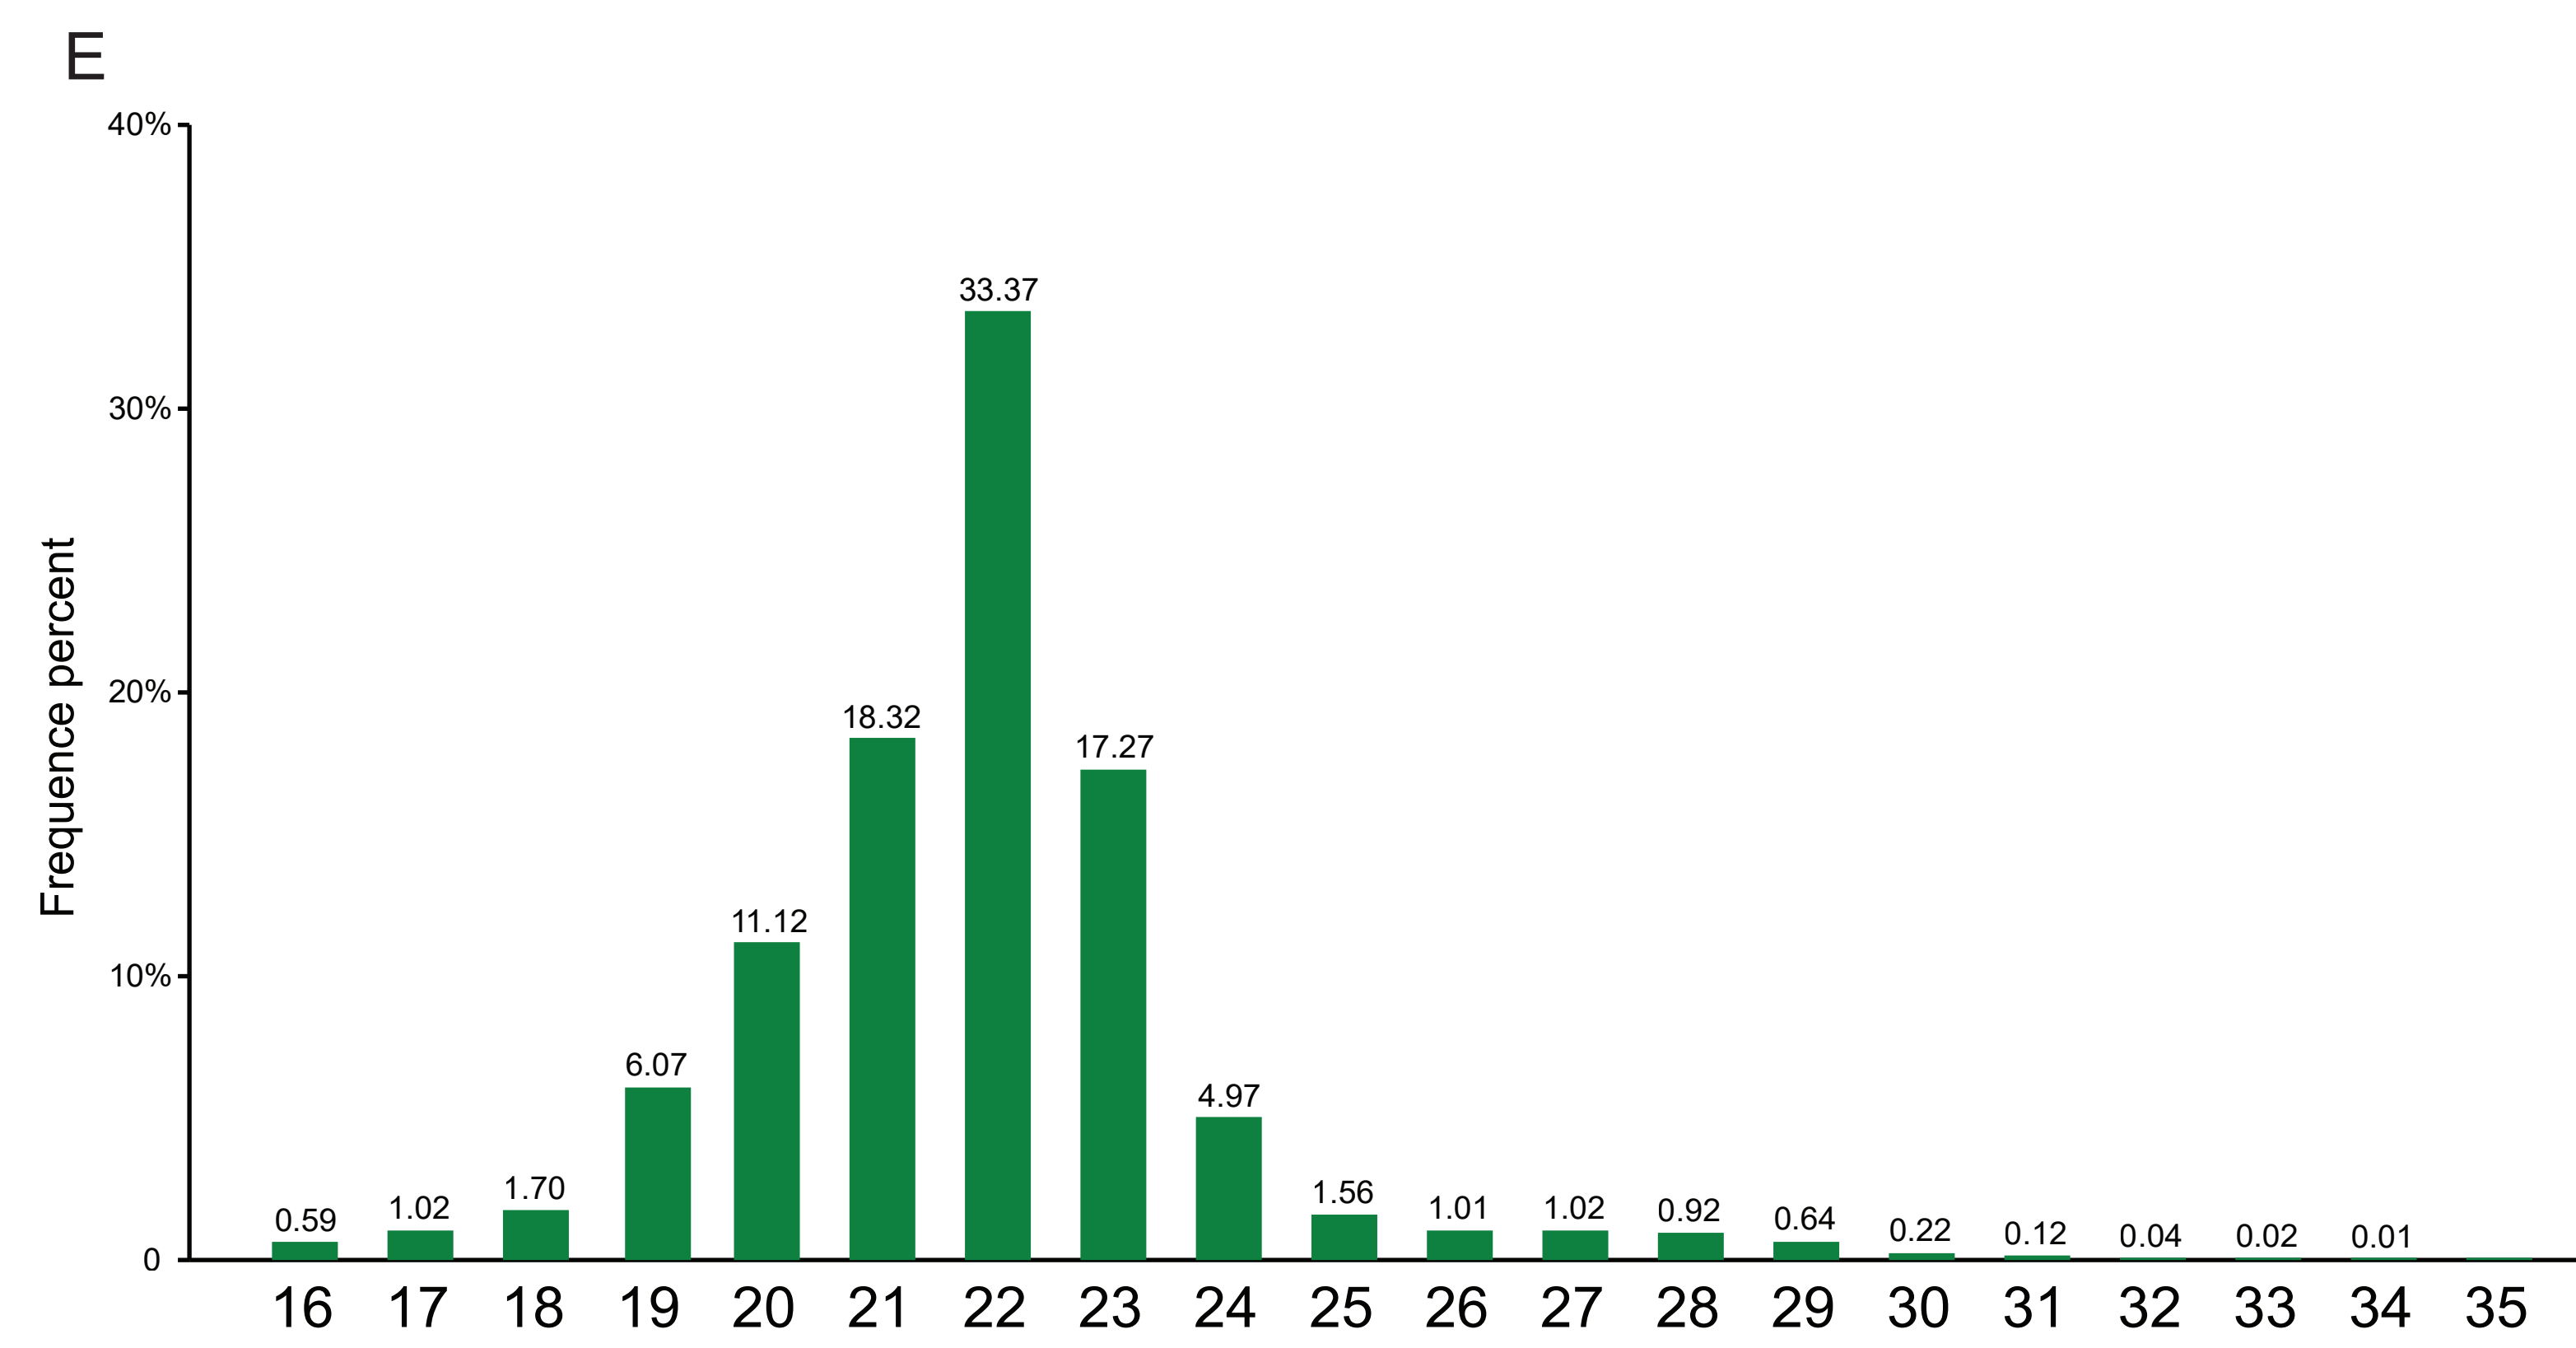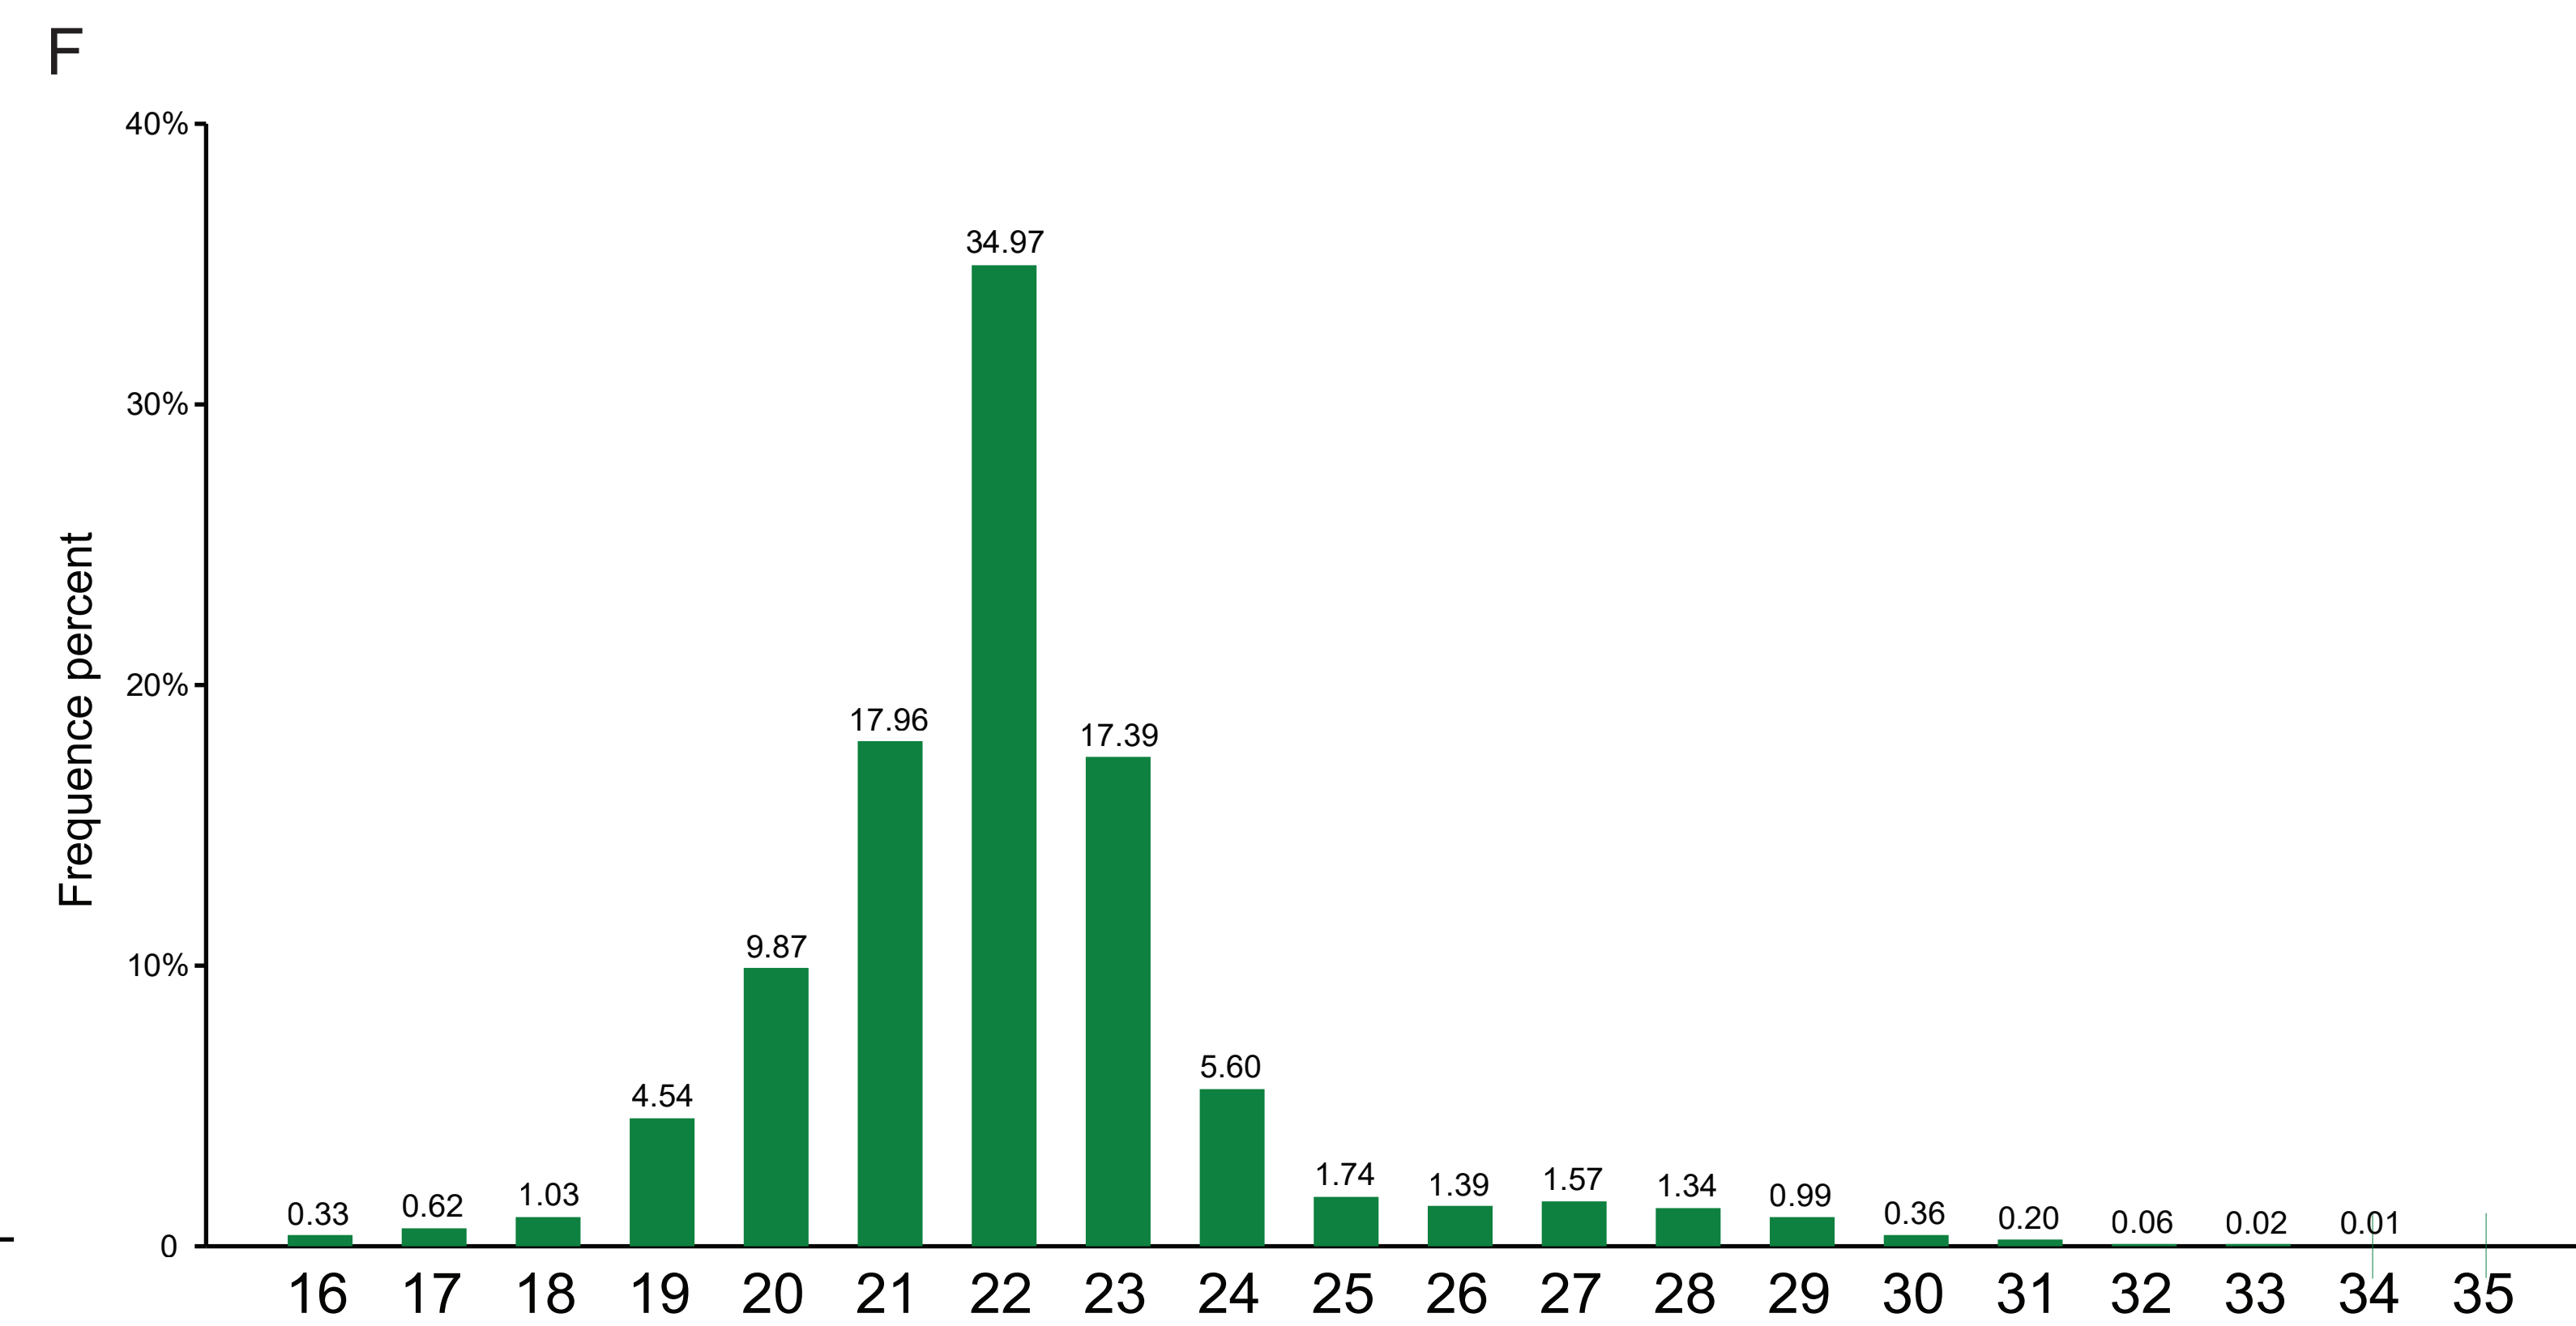

Supplement: Fig_S1.pdf [file Fig_S1.pdf]
