# Supplementary material for: Regulation of soldier caste differentiation by microRNAs in Formosan subterranean termite (Coptotermes formosanus Shiraki)
Source: PeerJ. 2024 Feb 29;12:e16843. doi: 10.7717/peerj.16843 (PMC10909360; doi:10.7717/peerj.16843)
Supplement: Supplemental Information 1 [file peerj-12-16843-s001.xlsx]

## Sheet: Sheet1
Target gene	Group name	Biological replicate	Ct value of the target gene				Ct value of the reference gene
			Technical replate 1	Technical replate 2	Technical replate 3		Technical replate 1	Technical replate 2	Technical replate 3
let-7-y	C group	Biological replicate 1	23.75	23.74	23.56		17.69	17.52	17.72
		Biological replicate 2	23	23.03	23.05		18.01	17.74	17.71
		Biological replicate 3	23.19	23.59	23.55		17.87	17.79	17.4
	M group	Biological replicate 1	22.43	22.87	22.71		18.46	18.07	17.79
		Biological replicate 2	23.35	23.78	23.67		18.86	18.52	18.38
		Biological replicate 3	21.39	21.54	21.28		17.55	16.96	17.36
miR-305-y	C group	Biological replicate 1	30.29	30.43	30.17		18.57	18.5	18.83
		Biological replicate 2	31.75	31.87	31.45		20.09	20.01	20.12
		Biological replicate 3	30	29.95	29.7		18.69	18.47	18.57
	M group	Biological replicate 1	28.35	28.41	28.33		18.88	18.71	18.86
		Biological replicate 2	28.42	28.41	28.23		18.72	18.5	18.64
		Biological replicate 3	29.04	29.27	29.22		19.14	19.06	19.05
miR-1175-y	C group	Biological replicate 1	24.17	24	24.03		19.44	19.32	19.09
		Biological replicate 2	21.46	21.36	21.13		19.14	19.3	19.15
		Biological replicate 3	18.24	18.13	18.03		18.74	19.1	18.65
	M group	Biological replicate 1	19.88	19.7	19.7		19.26	19.43	19.06
		Biological replicate 2	19.65	19.59	19.41		19.06	19.27	18.9
		Biological replicate 3	24.17	24.16	24.04		19.28	19.2	19.24
miR-181-x	C group	Biological replicate 1	33.53	33.44	33.11		19.03	18.98	18.86
		Biological replicate 2	32.06	32.09	31.67		19.14	19.13	18.94
		Biological replicate 3	31.09	30.81	30.85		18.48	18.88	18.48
	M group	Biological replicate 1	32.19	32.49	32.08		18.94	18.87	18.62
		Biological replicate 2	32.26	32.38	32.16		18.85	18.61	18.67
		Biological replicate 3	32.14	32.82	32.06		18.88	19.2	19.1
