# Supplementary material for: Regulation of soldier caste differentiation by microRNAs in Formosan subterranean termite (Coptotermes formosanus Shiraki)
Source: PeerJ. 2024 Feb 29;12:e16843. doi: 10.7717/peerj.16843 (PMC10909360; doi:10.7717/peerj.16843)
Supplement: Supplemental Information 3 [file peerj-12-16843-s003.xlsx]

## Sheet: Sheet1
miRNA	miRNA Sequence	Stem-loop RT primer	Forward primer
let-7-y	CTGTACAACTTGCTAACTTTCC	GTCGTATCCAGTGCAGGGTCCGAGGTATTCGCACTGGATACGACGGAAAG	TGCGACCTGTACAACTTGCTAA
miR-1175-y	TGAGATTCAACTCCTCCAACT	GTCGTATCCAGTGCAGGGTCCGAGGTATTCGCACTGGATACGACAGTTGG	CCGCTGAGATTCAACTCCT
miR-181-x	AACATTCAACGCTGTCGGTGAGT	GTCGTATCCAGTGCAGGGTCCGAGGTATTCGCACTGGATACGACACTCAC	GCAGGCAACATTCAACGCTGTCG
miR-305-y	CGGCACCTGTTGGAGTGCAATCC	GTCGTATCCAGTGCAGGGTCCGAGGTATTCGCACTGGATACGACGGATTG	CGGCACCTGTTGGAGTG
novel-m0649-y	CCTGTATATGGTCACTCTCCT	GTCGTATCCAGTGCAGGGTCCGAGGTATTCGCACTGGATACGACAGGAGA	CGTGGAGCCTGTATATGGTCAC
