# Supplementary material for: Regulation of soldier caste differentiation by microRNAs in Formosan subterranean termite (Coptotermes formosanus Shiraki)
Source: PeerJ. 2024 Feb 29;12:e16843. doi: 10.7717/peerj.16843 (PMC10909360; doi:10.7717/peerj.16843)
Supplement: Supplemental Information 4 [file peerj-12-16843-s004.xlsx]

## Sheet: clean_FQ.stat
ID	Clean reads	High quality	3' adapter null	Insert null	5' adapter contaminants	Smaller than 18nt	polyA	Low cutoff	Clean tags
C-1	12072425 (100%)	11818711 (97.8984%)	55443 (0.4691%)	39098 (0.3308%)	11264 (0.0953%)	417721 (3.5344%)	124 (0.0010%)	368785 (3.1203%)	10926276 (92.4490%)
C-2	12154950 (100%)	11895013 (97.8615%)	62832 (0.5282%)	47504 (0.3994%)	25847 (0.2173%)	313314 (2.6340%)	209 (0.0018%)	372310 (3.1300%)	11072997 (93.0894%)
C-3	12718148 (100%)	12442214 (97.8304%)	63362 (0.5093%)	57119 (0.4591%)	24723 (0.1987%)	346161 (2.7821%)	235 (0.0019%)	351365 (2.8240%)	11599249 (93.2250%)
M-1	14067702 (100%)	13783282 (97.9782%)	70238 (0.5096%)	55229 (0.4007%)	35483 (0.2574%)	369675 (2.6821%)	184 (0.0013%)	409445 (2.9706%)	12843028 (93.1783%)
M-2	11914955 (100%)	11659253 (97.8539%)	52421 (0.4496%)	53701 (0.4606%)	29353 (0.2518%)	471743 (4.0461%)	313 (0.0027%)	439590 (3.7703%)	10612132 (91.0190%)
M-3	11863003 (100%)	11609743 (97.8651%)	39074 (0.3366%)	37189 (0.3203%)	8987 (0.0774%)	264273 (2.2763%)	104 (0.0009%)	354793 (3.0560%)	10905323 (93.9325%)
