# Supplementary material for: Regulation of soldier caste differentiation by microRNAs in Formosan subterranean termite (Coptotermes formosanus Shiraki)
Source: PeerJ. 2024 Feb 29;12:e16843. doi: 10.7717/peerj.16843 (PMC10909360; doi:10.7717/peerj.16843)
Supplement: Supplemental Information 5 [file peerj-12-16843-s005.xlsx]

## Sheet: Sheet1
ID	Total	Genbank		Rfam
		rRNA	tRNA	rRNA	snRNA	snoRNA	tRNA
C-1	10926276	76881(0.70%)	53198(0.49%)	29281(0.27%)	5283(0.05%)	381(0.00%)	4979(0.05%)
C-2	11072997	80614(0.73%)	47098(0.43%)	27153(0.25%)	5763(0.05%)	436(0.00%)	5169(0.05%)
C-3	11599249	89769(0.77%)	17236(0.15%)	35250(0.30%)	1501(0.01%)	318(0.00%)	6058(0.05%)
M-1	12843028	85873(0.67%)	17639(0.14%)	21387(0.17%)	2313(0.02%)	123(0.00%)	5529(0.04%)
M-2	10612132	137127(1.29%)	20645(0.19%)	44227(0.42%)	9619(0.09%)	181(0.00%)	34743(0.33%)
M-3	10905323	86277(0.79%)	15616(0.14%)	25661(0.24%)	1646(0.02%)	102(0.00%)	5048(0.05%)
