# Supplementary material for: Regulation of soldier caste differentiation by microRNAs in Formosan subterranean termite (Coptotermes formosanus Shiraki)
Source: PeerJ. 2024 Feb 29;12:e16843. doi: 10.7717/peerj.16843 (PMC10909360; doi:10.7717/peerj.16843)
Supplement: Supplemental Information 6 [file peerj-12-16843-s006.xlsx]

## Sheet: Supplementary table 4. The miRN
miRNA	Target
iab-8-y	Unigene0000018
iab-8-y	Unigene0000183
iab-8-y	Unigene0000489
iab-8-y	Unigene0000494
iab-8-y	Unigene0000533
iab-8-y	Unigene0000561
iab-8-y	Unigene0000562
iab-8-y	Unigene0000582
iab-8-y	Unigene0000583
iab-8-y	Unigene0000653
iab-8-y	Unigene0000682
iab-8-y	Unigene0000721
iab-8-y	Unigene0000735
iab-8-y	Unigene0000756
iab-8-y	Unigene0000933
iab-8-y	Unigene0001026
iab-8-y	Unigene0001088
iab-8-y	Unigene0001131
iab-8-y	Unigene0001140
iab-8-y	Unigene0001149
iab-8-y	Unigene0001176
iab-8-y	Unigene0001261
iab-8-y	Unigene0001337
iab-8-y	Unigene0001408
iab-8-y	Unigene0001507
iab-8-y	Unigene0001528
iab-8-y	Unigene0001533
iab-8-y	Unigene0001562
iab-8-y	Unigene0001617
iab-8-y	Unigene0001789
iab-8-y	Unigene0001846
iab-8-y	Unigene0001878
iab-8-y	Unigene0001922
iab-8-y	Unigene0001931
iab-8-y	Unigene0002159
iab-8-y	Unigene0002184
iab-8-y	Unigene0002256
iab-8-y	Unigene0002300
iab-8-y	Unigene0002400
iab-8-y	Unigene0002410
iab-8-y	Unigene0002411
iab-8-y	Unigene0002471
iab-8-y	Unigene0002666
iab-8-y	Unigene0002741
iab-8-y	Unigene0002758
iab-8-y	Unigene0002767
iab-8-y	Unigene0002790
iab-8-y	Unigene0002872
iab-8-y	Unigene0002953
iab-8-y	Unigene0003150
iab-8-y	Unigene0003179
iab-8-y	Unigene0003235
iab-8-y	Unigene0003289
iab-8-y	Unigene0003299
iab-8-y	Unigene0003325
iab-8-y	Unigene0003420
iab-8-y	Unigene0003478
iab-8-y	Unigene0003506
iab-8-y	Unigene0003586
iab-8-y	Unigene0003705
iab-8-y	Unigene0003755
iab-8-y	Unigene0003764
iab-8-y	Unigene0003766
iab-8-y	Unigene0003790
iab-8-y	Unigene0003875
iab-8-y	Unigene0003933
iab-8-y	Unigene0004006
iab-8-y	Unigene0004118
iab-8-y	Unigene0004133
iab-8-y	Unigene0004243
iab-8-y	Unigene0004309
iab-8-y	Unigene0004316
iab-8-y	Unigene0004336
iab-8-y	Unigene0004339
iab-8-y	Unigene0004417
iab-8-y	Unigene0004439
iab-8-y	Unigene0004441
iab-8-y	Unigene0004473
iab-8-y	Unigene0004534
iab-8-y	Unigene0004547
iab-8-y	Unigene0004600
iab-8-y	Unigene0004617
iab-8-y	Unigene0004630
iab-8-y	Unigene0004644
iab-8-y	Unigene0004647
iab-8-y	Unigene0004660
iab-8-y	Unigene0004693
iab-8-y	Unigene0004962
iab-8-y	Unigene0004987
iab-8-y	Unigene0005005
iab-8-y	Unigene0005045
iab-8-y	Unigene0005085
iab-8-y	Unigene0005092
iab-8-y	Unigene0005117
iab-8-y	Unigene0005203
iab-8-y	Unigene0005260
iab-8-y	Unigene0005328
iab-8-y	Unigene0005337
iab-8-y	Unigene0005467
iab-8-y	Unigene0005518
iab-8-y	Unigene0005622
iab-8-y	Unigene0005629
iab-8-y	Unigene0005733
iab-8-y	Unigene0005738
iab-8-y	Unigene0005746
iab-8-y	Unigene0005836
iab-8-y	Unigene0005853
iab-8-y	Unigene0005864
iab-8-y	Unigene0005998
iab-8-y	Unigene0006082
iab-8-y	Unigene0006083
iab-8-y	Unigene0006085
iab-8-y	Unigene0006107
iab-8-y	Unigene0006157
iab-8-y	Unigene0006185
iab-8-y	Unigene0006257
iab-8-y	Unigene0006277
iab-8-y	Unigene0006436
iab-8-y	Unigene0006577
iab-8-y	Unigene0006722
iab-8-y	Unigene0006723
iab-8-y	Unigene0007018
iab-8-y	Unigene0007072
iab-8-y	Unigene0007228
iab-8-y	Unigene0007251
iab-8-y	Unigene0007461
iab-8-y	Unigene0007622
iab-8-y	Unigene0007710
iab-8-y	Unigene0007729
iab-8-y	Unigene0007935
iab-8-y	Unigene0007938
iab-8-y	Unigene0007940
iab-8-y	Unigene0008024
iab-8-y	Unigene0008066
iab-8-y	Unigene0008144
iab-8-y	Unigene0008150
iab-8-y	Unigene0008199
iab-8-y	Unigene0008214
iab-8-y	Unigene0008245
iab-8-y	Unigene0008367
iab-8-y	Unigene0008434
iab-8-y	Unigene0008460
iab-8-y	Unigene0008490
iab-8-y	Unigene0008510
iab-8-y	Unigene0008514
iab-8-y	Unigene0008582
iab-8-y	Unigene0008664
iab-8-y	Unigene0008692
iab-8-y	Unigene0008717
iab-8-y	Unigene0008727
iab-8-y	Unigene0008743
iab-8-y	Unigene0008760
iab-8-y	Unigene0008788
iab-8-y	Unigene0008792
iab-8-y	Unigene0008829
iab-8-y	Unigene0008852
iab-8-y	Unigene0008859
iab-8-y	Unigene0008862
iab-8-y	Unigene0008865
iab-8-y	Unigene0008913
iab-8-y	Unigene0008937
iab-8-y	Unigene0008949
iab-8-y	Unigene0009012
iab-8-y	Unigene0009018
iab-8-y	Unigene0009049
iab-8-y	Unigene0009183
iab-8-y	Unigene0009245
iab-8-y	Unigene0009284
iab-8-y	Unigene0009295
iab-8-y	Unigene0009317
iab-8-y	Unigene0009380
iab-8-y	Unigene0009386
iab-8-y	Unigene0009439
iab-8-y	Unigene0009524
iab-8-y	Unigene0009640
iab-8-y	Unigene0009705
iab-8-y	Unigene0009861
iab-8-y	Unigene0009868
iab-8-y	Unigene0009883
iab-8-y	Unigene0010099
iab-8-y	Unigene0010164
iab-8-y	Unigene0010165
iab-8-y	Unigene0010166
iab-8-y	Unigene0010256
iab-8-y	Unigene0010263
iab-8-y	Unigene0010378
iab-8-y	Unigene0010400
iab-8-y	Unigene0010569
iab-8-y	Unigene0010656
iab-8-y	Unigene0010689
iab-8-y	Unigene0010736
iab-8-y	Unigene0010756
iab-8-y	Unigene0010758
iab-8-y	Unigene0010764
iab-8-y	Unigene0010777
iab-8-y	Unigene0010825
iab-8-y	Unigene0010944
iab-8-y	Unigene0011102
iab-8-y	Unigene0011228
iab-8-y	Unigene0011237
iab-8-y	Unigene0011295
iab-8-y	Unigene0011299
iab-8-y	Unigene0011427
iab-8-y	Unigene0011448
iab-8-y	Unigene0011472
iab-8-y	Unigene0011521
iab-8-y	Unigene0011526
iab-8-y	Unigene0011543
iab-8-y	Unigene0011556
iab-8-y	Unigene0011639
iab-8-y	Unigene0011714
iab-8-y	Unigene0011742
iab-8-y	Unigene0011745
iab-8-y	Unigene0011780
iab-8-y	Unigene0011795
iab-8-y	Unigene0011824
iab-8-y	Unigene0011895
iab-8-y	Unigene0011926
iab-8-y	Unigene0011976
iab-8-y	Unigene0012078
iab-8-y	Unigene0012082
iab-8-y	Unigene0012084
iab-8-y	Unigene0012090
iab-8-y	Unigene0012164
iab-8-y	Unigene0012195
iab-8-y	Unigene0012197
iab-8-y	Unigene0012244
iab-8-y	Unigene0012262
iab-8-y	Unigene0012319
iab-8-y	Unigene0012355
iab-8-y	Unigene0012409
iab-8-y	Unigene0012643
iab-8-y	Unigene0012675
iab-8-y	Unigene0012699
iab-8-y	Unigene0012700
iab-8-y	Unigene0012786
iab-8-y	Unigene0012824
iab-8-y	Unigene0012846
iab-8-y	Unigene0012849
iab-8-y	Unigene0012898
iab-8-y	Unigene0013024
iab-8-y	Unigene0013158
iab-8-y	Unigene0013192
iab-8-y	Unigene0013215
iab-8-y	Unigene0013220
iab-8-y	Unigene0013226
iab-8-y	Unigene0013280
iab-8-y	Unigene0013304
iab-8-y	Unigene0013408
iab-8-y	Unigene0013478
iab-8-y	Unigene0013605
iab-8-y	Unigene0013610
iab-8-y	Unigene0013627
iab-8-y	Unigene0013642
iab-8-y	Unigene0013657
iab-8-y	Unigene0013705
iab-8-y	Unigene0013747
iab-8-y	Unigene0013833
iab-8-y	Unigene0013893
iab-8-y	Unigene0013898
iab-8-y	Unigene0013910
iab-8-y	Unigene0013911
iab-8-y	Unigene0013916
iab-8-y	Unigene0013928
iab-8-y	Unigene0013933
iab-8-y	Unigene0013946
iab-8-y	Unigene0013950
iab-8-y	Unigene0013975
iab-8-y	Unigene0014010
iab-8-y	Unigene0014021
iab-8-y	Unigene0014071
iab-8-y	Unigene0014107
iab-8-y	Unigene0014144
iab-8-y	Unigene0014160
iab-8-y	Unigene0014198
iab-8-y	Unigene0014201
iab-8-y	Unigene0014243
iab-8-y	Unigene0014279
iab-8-y	Unigene0014358
iab-8-y	Unigene0014405
iab-8-y	Unigene0014444
iab-8-y	Unigene0014447
iab-8-y	Unigene0014554
iab-8-y	Unigene0014610
iab-8-y	Unigene0014628
iab-8-y	Unigene0014667
iab-8-y	Unigene0014742
iab-8-y	Unigene0014787
iab-8-y	Unigene0014829
iab-8-y	Unigene0014843
iab-8-y	Unigene0014890
iab-8-y	Unigene0014893
iab-8-y	Unigene0014920
iab-8-y	Unigene0014985
iab-8-y	Unigene0015113
iab-8-y	Unigene0015121
iab-8-y	Unigene0015130
iab-8-y	Unigene0015167
iab-8-y	Unigene0015332
iab-8-y	Unigene0015346
iab-8-y	Unigene0015374
iab-8-y	Unigene0015631
iab-8-y	Unigene0015704
iab-8-y	Unigene0015844
iab-8-y	Unigene0015953
iab-8-y	Unigene0016074
iab-8-y	Unigene0016087
iab-8-y	Unigene0016097
iab-8-y	Unigene0016100
iab-8-y	Unigene0016160
iab-8-y	Unigene0016399
iab-8-y	Unigene0025290
iab-8-y	Unigene0025453
iab-8-y	Unigene0026316
iab-8-y	Unigene0026676
iab-8-y	Unigene0028445
iab-8-y	Unigene0029480
iab-8-y	Unigene0029757
iab-8-y	Unigene0030754
iab-8-y	Unigene0031643
iab-8-y	Unigene0032097
iab-8-y	Unigene0032098
iab-8-y	Unigene0032228
iab-8-y	Unigene0032233
iab-8-y	Unigene0032234
iab-8-y	Unigene0033222
iab-8-y	Unigene0033944
iab-8-y	Unigene0034144
iab-8-y	Unigene0035038
iab-8-y	Unigene0035061
iab-8-y	Unigene0035109
iab-8-y	Unigene0036516
iab-8-y	Unigene0037836
iab-8-y	Unigene0038228
iab-8-y	Unigene0039015
iab-8-y	Unigene0039790
iab-8-y	Unigene0040170
iab-8-y	Unigene0040228
iab-8-y	Unigene0040229
iab-8-y	Unigene0040561
iab-8-y	Unigene0040776
iab-8-y	Unigene0040918
iab-8-y	Unigene0040980
iab-8-y	Unigene0041087
iab-8-y	Unigene0041319
iab-8-y	Unigene0041374
iab-8-y	Unigene0041643
iab-8-y	Unigene0041696
iab-8-y	Unigene0041777
iab-8-y	Unigene0042779
iab-8-y	Unigene0043289
iab-8-y	Unigene0043439
iab-8-y	Unigene0043465
iab-8-y	Unigene0043531
iab-8-y	Unigene0043638
iab-8-y	Unigene0043644
iab-8-y	Unigene0043774
iab-8-y	Unigene0044043
iab-8-y	Unigene0044211
iab-8-y	Unigene0044454
iab-8-y	Unigene0044457
iab-8-y	Unigene0044573
iab-8-y	Unigene0044719
iab-8-y	Unigene0044720
iab-8-y	Unigene0044852
iab-8-y	Unigene0045139
iab-8-y	Unigene0045143
iab-8-y	Unigene0045284
iab-8-y	Unigene0045290
iab-8-y	Unigene0045291
iab-8-y	Unigene0045466
iab-8-y	Unigene0045593
iab-8-y	Unigene0045613
iab-8-y	Unigene0045628
iab-8-y	Unigene0045635
iab-8-y	Unigene0045881
iab-8-y	Unigene0045954
iab-8-y	Unigene0046142
iab-8-y	Unigene0046163
iab-8-y	Unigene0046181
iab-8-y	Unigene0046204
iab-8-y	Unigene0046257
iab-8-y	Unigene0046315
iab-8-y	Unigene0046404
iab-8-y	Unigene0046456
iab-8-y	Unigene0046513
iab-8-y	Unigene0046533
iab-8-y	Unigene0046737
iab-8-y	Unigene0046798
iab-8-y	Unigene0046832
iab-8-y	Unigene0046854
iab-8-y	Unigene0046909
iab-8-y	Unigene0047146
iab-8-y	Unigene0047342
iab-8-y	Unigene0047573
iab-8-y	Unigene0047829
iab-8-y	Unigene0047868
iab-8-y	Unigene0047926
iab-8-y	Unigene0048022
iab-8-y	Unigene0048149
iab-8-y	Unigene0048219
iab-8-y	Unigene0048274
iab-8-y	Unigene0048315
iab-8-y	Unigene0048423
iab-8-y	Unigene0048429
iab-8-y	Unigene0048560
iab-8-y	Unigene0048627
iab-8-y	Unigene0048697
iab-8-y	Unigene0048757
iab-8-y	Unigene0048871
iab-8-y	Unigene0048915
iab-8-y	Unigene0048916
iab-8-y	Unigene0048959
iab-8-y	Unigene0049041
iab-8-y	Unigene0049057
iab-8-y	Unigene0049068
iab-8-y	Unigene0049164
iab-8-y	Unigene0049203
iab-8-y	Unigene0049215
iab-8-y	Unigene0049306
iab-8-y	Unigene0049438
iab-8-y	Unigene0049445
iab-8-y	Unigene0049487
iab-8-y	Unigene0049553
iab-8-y	Unigene0049615
iab-8-y	Unigene0049641
iab-8-y	Unigene0049703
iab-8-y	Unigene0049737
iab-8-y	Unigene0049927
iab-8-y	Unigene0049995
iab-8-y	Unigene0050100
iab-8-y	Unigene0050236
iab-8-y	Unigene0050320
iab-8-y	Unigene0050358
iab-8-y	Unigene0050362
iab-8-y	Unigene0050369
iab-8-y	Unigene0050423
iab-8-y	Unigene0050439
iab-8-y	Unigene0050489
iab-8-y	Unigene0050495
iab-8-y	Unigene0050497
iab-8-y	Unigene0050536
iab-8-y	Unigene0050552
iab-8-y	Unigene0050657
iab-8-y	Unigene0050765
iab-8-y	Unigene0050810
iab-8-y	Unigene0050876
iab-8-y	Unigene0050900
iab-8-y	Unigene0050956
iab-8-y	Unigene0050999
iab-8-y	Unigene0051010
iab-8-y	Unigene0051041
iab-8-y	Unigene0051083
iab-8-y	Unigene0051099
iab-8-y	Unigene0051104
iab-8-y	Unigene0051196
iab-8-y	Unigene0051225
iab-8-y	Unigene0051285
iab-8-y	Unigene0051291
iab-8-y	Unigene0051299
iab-8-y	Unigene0051317
iab-8-y	Unigene0051322
iab-8-y	Unigene0051333
iab-8-y	Unigene0051345
iab-8-y	Unigene0051359
iab-8-y	Unigene0051376
iab-8-y	Unigene0051421
iab-8-y	Unigene0051491
iab-8-y	Unigene0051511
iab-8-y	Unigene0051553
iab-8-y	Unigene0051583
iab-8-y	Unigene0051647
iab-8-y	Unigene0051734
iab-8-y	Unigene0051781
iab-8-y	Unigene0051812
iab-8-y	Unigene0051829
iab-8-y	Unigene0051920
iab-8-y	Unigene0051924
iab-8-y	Unigene0051927
iab-8-y	Unigene0051937
iab-8-y	Unigene0051955
iab-8-y	Unigene0052020
iab-8-y	Unigene0052048
iab-8-y	Unigene0052073
iab-8-y	Unigene0052158
iab-8-y	Unigene0052223
iab-8-y	Unigene0052255
iab-8-y	Unigene0052351
iab-8-y	Unigene0052363
iab-8-y	Unigene0052447
iab-8-y	Unigene0052524
iab-8-y	Unigene0052526
iab-8-y	Unigene0052529
iab-8-y	Unigene0052565
iab-8-y	Unigene0052568
iab-8-y	Unigene0052601
iab-8-y	Unigene0052673
iab-8-y	Unigene0052735
iab-8-y	Unigene0052858
iab-8-y	Unigene0052935
iab-8-y	Unigene0052960
iab-8-y	Unigene0053065
iab-8-y	Unigene0053109
iab-8-y	Unigene0053147
iab-8-y	Unigene0053149
iab-8-y	Unigene0053155
iab-8-y	Unigene0053201
iab-8-y	Unigene0053212
iab-8-y	Unigene0053225
iab-8-y	Unigene0053342
iab-8-y	Unigene0053423
iab-8-y	Unigene0053487
iab-8-y	Unigene0053532
iab-8-y	Unigene0053618
iab-8-y	Unigene0053674
iab-8-y	Unigene0053769
iab-8-y	Unigene0053811
iab-8-y	Unigene0053822
iab-8-y	Unigene0053854
iab-8-y	Unigene0053863
iab-8-y	Unigene0053963
iab-8-y	Unigene0053965
iab-8-y	Unigene0053974
iab-8-y	Unigene0054050
iab-8-y	Unigene0054051
iab-8-y	Unigene0054073
iab-8-y	Unigene0054091
iab-8-y	Unigene0054098
iab-8-y	Unigene0054199
iab-8-y	Unigene0054274
iab-8-y	Unigene0054466
iab-8-y	Unigene0054525
iab-8-y	Unigene0054615
iab-8-y	Unigene0054622
iab-8-y	Unigene0054718
iab-8-y	Unigene0054756
iab-8-y	Unigene0054767
iab-8-y	Unigene0054908
iab-8-y	Unigene0054938
iab-8-y	Unigene0054942
iab-8-y	Unigene0054954
iab-8-y	Unigene0054956
iab-8-y	Unigene0054981
iab-8-y	Unigene0055004
iab-8-y	Unigene0055006
iab-8-y	Unigene0055033
iab-8-y	Unigene0055153
iab-8-y	Unigene0055191
iab-8-y	Unigene0055234
iab-8-y	Unigene0055250
iab-8-y	Unigene0055284
iab-8-y	Unigene0055321
iab-8-y	Unigene0055336
iab-8-y	Unigene0055393
iab-8-y	Unigene0055431
iab-8-y	Unigene0055463
iab-8-y	Unigene0055564
iab-8-y	Unigene0055634
iab-8-y	Unigene0055718
iab-8-y	Unigene0055730
iab-8-y	Unigene0055746
iab-8-y	Unigene0055798
iab-8-y	Unigene0055809
iab-8-y	Unigene0055821
iab-8-y	Unigene0055834
iab-8-y	Unigene0055856
iab-8-y	Unigene0055862
iab-8-y	Unigene0055890
iab-8-y	Unigene0055914
iab-8-y	Unigene0055961
iab-8-y	Unigene0055980
iab-8-y	Unigene0056032
iab-8-y	Unigene0056045
iab-8-y	Unigene0056162
iab-8-y	Unigene0056193
iab-8-y	Unigene0056285
iab-8-y	Unigene0056293
iab-8-y	Unigene0056304
iab-8-y	Unigene0056327
iab-8-y	Unigene0056342
iab-8-y	Unigene0056393
iab-8-y	Unigene0056475
iab-8-y	Unigene0056479
iab-8-y	Unigene0056564
iab-8-y	Unigene0056596
iab-8-y	Unigene0056610
iab-8-y	Unigene0056611
iab-8-y	Unigene0056648
iab-8-y	Unigene0056666
iab-8-y	Unigene0056676
iab-8-y	Unigene0056686
iab-8-y	Unigene0056710
iab-8-y	Unigene0056717
iab-8-y	Unigene0056721
iab-8-y	Unigene0056812
iab-8-y	Unigene0056883
iab-8-y	Unigene0057040
iab-8-y	Unigene0057045
iab-8-y	Unigene0057098
iab-8-y	Unigene0057106
iab-8-y	Unigene0057179
iab-8-y	Unigene0057340
iab-8-y	Unigene0057342
iab-8-y	Unigene0057349
iab-8-y	Unigene0057361
iab-8-y	Unigene0057399
iab-8-y	Unigene0057425
iab-8-y	Unigene0057440
iab-8-y	Unigene0057522
iab-8-y	Unigene0057617
iab-8-y	Unigene0057652
iab-8-y	Unigene0057682
iab-8-y	Unigene0057727
iab-8-y	Unigene0057759
iab-8-y	Unigene0057816
iab-8-y	Unigene0057836
iab-8-y	Unigene0057844
iab-8-y	Unigene0057946
iab-8-y	Unigene0058109
iab-8-y	Unigene0058131
iab-8-y	Unigene0058190
iab-8-y	Unigene0058239
iab-8-y	Unigene0058326
iab-8-y	Unigene0058406
iab-8-y	Unigene0058420
iab-8-y	Unigene0058447
iab-8-y	Unigene0058476
iab-8-y	Unigene0058490
iab-8-y	Unigene0058574
iab-8-y	Unigene0058595
iab-8-y	Unigene0058618
iab-8-y	Unigene0058625
iab-8-y	Unigene0058653
iab-8-y	Unigene0058665
iab-8-y	Unigene0058668
iab-8-y	Unigene0058728
iab-8-y	Unigene0058772
iab-8-y	Unigene0058787
iab-8-y	Unigene0058811
iab-8-y	Unigene0058863
iab-8-y	Unigene0058994
iab-8-y	Unigene0059003
iab-8-y	Unigene0059053
iab-8-y	Unigene0059096
iab-8-y	Unigene0059161
iab-8-y	Unigene0059179
iab-8-y	Unigene0059228
iab-8-y	Unigene0059270
iab-8-y	Unigene0059303
iab-8-y	Unigene0059321
iab-8-y	Unigene0059349
iab-8-y	Unigene0059356
iab-8-y	Unigene0059506
iab-8-y	Unigene0059527
iab-8-y	Unigene0059540
iab-8-y	Unigene0059590
iab-8-y	Unigene0059747
iab-8-y	Unigene0059849
iab-8-y	Unigene0059853
iab-8-y	Unigene0059888
iab-8-y	Unigene0059924
iab-8-y	Unigene0059977
iab-8-y	Unigene0060026
iab-8-y	Unigene0060043
iab-8-y	Unigene0060058
iab-8-y	Unigene0060137
iab-8-y	Unigene0060173
iab-8-y	Unigene0060228
iab-8-y	Unigene0060245
iab-8-y	Unigene0060248
iab-8-y	Unigene0060299
iab-8-y	Unigene0060377
iab-8-y	Unigene0060378
iab-8-y	Unigene0060379
iab-8-y	Unigene0060409
iab-8-y	Unigene0060450
iab-8-y	Unigene0060456
iab-8-y	Unigene0060520
iab-8-y	Unigene0060638
iab-8-y	Unigene0060711
iab-8-y	Unigene0060712
iab-8-y	Unigene0060717
iab-8-y	Unigene0060737
iab-8-y	Unigene0060806
iab-8-y	Unigene0060856
iab-8-y	Unigene0060873
iab-8-y	Unigene0060912
iab-8-y	Unigene0061000
iab-8-y	Unigene0061045
iab-8-y	Unigene0061077
iab-8-y	Unigene0061169
iab-8-y	Unigene0061179
iab-8-y	Unigene0061193
iab-8-y	Unigene0061208
iab-8-y	Unigene0061342
iab-8-y	Unigene0061349
iab-8-y	Unigene0061363
iab-8-y	Unigene0061390
iab-8-y	Unigene0061523
iab-8-y	Unigene0061557
iab-8-y	Unigene0061570
iab-8-y	Unigene0061583
iab-8-y	Unigene0061736
iab-8-y	Unigene0061741
iab-8-y	Unigene0061746
iab-8-y	Unigene0062038
iab-8-y	Unigene0062090
iab-8-y	Unigene0062162
iab-8-y	Unigene0062175
iab-8-y	Unigene0062211
iab-8-y	Unigene0062217
iab-8-y	Unigene0062219
iab-8-y	Unigene0062256
iab-8-y	Unigene0062260
iab-8-y	Unigene0062264
iab-8-y	Unigene0062310
iab-8-y	Unigene0062331
iab-8-y	Unigene0062363
iab-8-y	Unigene0062442
iab-8-y	Unigene0062443
iab-8-y	Unigene0062545
iab-8-y	Unigene0062552
iab-8-y	Unigene0062568
iab-8-y	Unigene0062571
iab-8-y	Unigene0062589
iab-8-y	Unigene0062762
iab-8-y	Unigene0062831
iab-8-y	Unigene0062832
iab-8-y	Unigene0062877
iab-8-y	Unigene0062976
iab-8-y	Unigene0062986
iab-8-y	Unigene0063006
iab-8-y	Unigene0063019
iab-8-y	Unigene0063028
iab-8-y	Unigene0063095
iab-8-y	Unigene0063141
iab-8-y	Unigene0063400
iab-8-y	Unigene0063602
iab-8-y	Unigene0063658
iab-8-y	Unigene0063670
iab-8-y	Unigene0063700
iab-8-y	Unigene0063732
iab-8-y	Unigene0063849
iab-8-y	Unigene0063895
iab-8-y	Unigene0064079
iab-8-y	Unigene0064098
iab-8-y	Unigene0064216
iab-8-y	Unigene0064242
iab-8-y	Unigene0064252
iab-8-y	Unigene0064356
iab-8-y	Unigene0064465
iab-8-y	Unigene0064582
iab-8-y	Unigene0064610
iab-8-y	Unigene0064674
iab-8-y	Unigene0064693
iab-8-y	Unigene0064762
iab-8-y	Unigene0064772
iab-8-y	Unigene0064790
iab-8-y	Unigene0064859
iab-8-y	Unigene0064931
iab-8-y	Unigene0064934
iab-8-y	Unigene0065042
iab-8-y	Unigene0065066
iab-8-y	Unigene0065141
iab-8-y	Unigene0065152
iab-8-y	Unigene0065156
iab-8-y	Unigene0065188
iab-8-y	Unigene0065215
iab-8-y	Unigene0065226
iab-8-y	Unigene0065261
iab-8-y	Unigene0065306
iab-8-y	Unigene0065351
iab-8-y	Unigene0065382
iab-8-y	Unigene0065396
iab-8-y	Unigene0065410
iab-8-y	Unigene0065414
iab-8-y	Unigene0065524
iab-8-y	Unigene0065606
iab-8-y	Unigene0065679
iab-8-y	Unigene0065700
iab-8-y	Unigene0065744
iab-8-y	Unigene0065748
iab-8-y	Unigene0065766
iab-8-y	Unigene0065778
iab-8-y	Unigene0065950
iab-8-y	Unigene0066021
iab-8-y	Unigene0066054
iab-8-y	Unigene0066063
iab-8-y	Unigene0066106
iab-8-y	Unigene0066144
iab-8-y	Unigene0066191
iab-8-y	Unigene0066214
iab-8-y	Unigene0066431
iab-8-y	Unigene0066526
iab-8-y	Unigene0066530
iab-8-y	Unigene0066566
iab-8-y	Unigene0066594
iab-8-y	Unigene0066745
iab-8-y	Unigene0066789
iab-8-y	Unigene0066845
iab-8-y	Unigene0066884
iab-8-y	Unigene0066921
iab-8-y	Unigene0067008
iab-8-y	Unigene0067036
iab-8-y	Unigene0067041
iab-8-y	Unigene0067084
iab-8-y	Unigene0067164
iab-8-y	Unigene0067172
iab-8-y	Unigene0067191
iab-8-y	Unigene0067215
iab-8-y	Unigene0067221
iab-8-y	Unigene0067269
iab-8-y	Unigene0067287
iab-8-y	Unigene0067335
iab-8-y	Unigene0067408
iab-8-y	Unigene0067464
iab-8-y	Unigene0067469
iab-8-y	Unigene0067483
iab-8-y	Unigene0067510
iab-8-y	Unigene0067549
iab-8-y	Unigene0067565
iab-8-y	Unigene0067588
iab-8-y	Unigene0067655
iab-8-y	Unigene0067736
iab-8-y	Unigene0067743
iab-8-y	Unigene0067808
iab-8-y	Unigene0067910
iab-8-y	Unigene0067940
iab-8-y	Unigene0068101
iab-8-y	Unigene0068104
iab-8-y	Unigene0068133
iab-8-y	Unigene0068146
iab-8-y	Unigene0068152
iab-8-y	Unigene0068158
iab-8-y	Unigene0068205
iab-8-y	Unigene0068245
iab-8-y	Unigene0068279
iab-8-y	Unigene0068408
iab-8-y	Unigene0068472
iab-8-y	Unigene0068681
iab-8-y	Unigene0068760
iab-8-y	Unigene0068887
iab-8-y	Unigene0068898
iab-8-y	Unigene0068901
iab-8-y	Unigene0068923
iab-8-y	Unigene0069038
iab-8-y	Unigene0069053
iab-8-y	Unigene0069157
iab-8-y	Unigene0069210
iab-8-y	Unigene0069260
iab-8-y	Unigene0069295
iab-8-y	Unigene0069362
iab-8-y	Unigene0069390
iab-8-y	Unigene0069439
iab-8-y	Unigene0069587
iab-8-y	Unigene0069611
iab-8-y	Unigene0069683
iab-8-y	Unigene0069695
iab-8-y	Unigene0069699
iab-8-y	Unigene0069722
iab-8-y	Unigene0069734
iab-8-y	Unigene0069773
iab-8-y	Unigene0069811
iab-8-y	Unigene0069823
iab-8-y	Unigene0069883
iab-8-y	Unigene0069969
iab-8-y	Unigene0069977
iab-8-y	Unigene0070003
iab-8-y	Unigene0070072
iab-8-y	Unigene0070105
iab-8-y	Unigene0070133
iab-8-y	Unigene0070156
iab-8-y	Unigene0070163
iab-8-y	Unigene0070239
iab-8-y	Unigene0070297
iab-8-y	Unigene0070327
iab-8-y	Unigene0070351
iab-8-y	Unigene0070386
iab-8-y	Unigene0070478
iab-8-y	Unigene0070622
iab-8-y	Unigene0070697
iab-8-y	Unigene0070720
iab-8-y	Unigene0070726
iab-8-y	Unigene0070774
iab-8-y	Unigene0070828
iab-8-y	Unigene0070837
iab-8-y	Unigene0070892
iab-8-y	Unigene0070985
iab-8-y	Unigene0071004
iab-8-y	Unigene0071046
iab-8-y	Unigene0071059
iab-8-y	Unigene0071087
iab-8-y	Unigene0071122
iab-8-y	Unigene0071135
iab-8-y	Unigene0071161
iab-8-y	Unigene0071178
iab-8-y	Unigene0071186
iab-8-y	Unigene0071255
iab-8-y	Unigene0071298
iab-8-y	Unigene0071314
iab-8-y	Unigene0071336
iab-8-y	Unigene0071342
iab-8-y	Unigene0071367
iab-8-y	Unigene0071414
iab-8-y	Unigene0071510
iab-8-y	Unigene0071519
iab-8-y	Unigene0071633
iab-8-y	Unigene0071638
iab-8-y	Unigene0071643
iab-8-y	Unigene0071652
iab-8-y	Unigene0071772
iab-8-y	Unigene0071775
iab-8-y	Unigene0071840
iab-8-y	Unigene0071861
iab-8-y	Unigene0071864
iab-8-y	Unigene0071895
iab-8-y	Unigene0071999
iab-8-y	Unigene0072136
iab-8-y	Unigene0072155
iab-8-y	Unigene0072170
iab-8-y	Unigene0072212
iab-8-y	Unigene0072274
iab-8-y	Unigene0072302
iab-8-y	Unigene0072321
iab-8-y	Unigene0072346
iab-8-y	Unigene0072352
iab-8-y	Unigene0072382
iab-8-y	Unigene0072442
iab-8-y	Unigene0072471
iab-8-y	Unigene0072518
iab-8-y	Unigene0072607
iab-8-y	Unigene0072735
iab-8-y	Unigene0072792
iab-8-y	Unigene0072807
iab-8-y	Unigene0072831
iab-8-y	Unigene0072842
iab-8-y	Unigene0072873
iab-8-y	Unigene0073060
iab-8-y	Unigene0073064
iab-8-y	Unigene0073097
iab-8-y	Unigene0073212
iab-8-y	Unigene0073258
iab-8-y	Unigene0073275
iab-8-y	Unigene0073326
iab-8-y	Unigene0073336
iab-8-y	Unigene0073479
iab-8-y	Unigene0073489
iab-8-y	Unigene0073492
iab-8-y	Unigene0073516
iab-8-y	Unigene0073634
iab-8-y	Unigene0073642
iab-8-y	Unigene0073706
iab-8-y	Unigene0073767
iab-8-y	Unigene0073853
iab-8-y	Unigene0074115
iab-8-y	Unigene0074152
iab-8-y	Unigene0074217
iab-8-y	Unigene0074240
iab-8-y	Unigene0074297
iab-8-y	Unigene0074319
iab-8-y	Unigene0074328
iab-8-y	Unigene0074342
iab-8-y	Unigene0074473
iab-8-y	Unigene0074540
iab-8-y	Unigene0074639
iab-8-y	Unigene0074695
iab-8-y	Unigene0074749
iab-8-y	Unigene0074912
iab-8-y	Unigene0074936
iab-8-y	Unigene0074963
iab-8-y	Unigene0074990
iab-8-y	Unigene0075076
iab-8-y	Unigene0075125
iab-8-y	Unigene0075164
iab-8-y	Unigene0075203
iab-8-y	Unigene0075337
iab-8-y	Unigene0075464
iab-8-y	Unigene0075489
iab-8-y	Unigene0075494
iab-8-y	Unigene0075528
iab-8-y	Unigene0075545
iab-8-y	Unigene0075623
iab-8-y	Unigene0075714
iab-8-y	Unigene0075805
iab-8-y	Unigene0075871
iab-8-y	Unigene0075875
iab-8-y	Unigene0075927
iab-8-y	Unigene0075954
iab-8-y	Unigene0076015
iab-8-y	Unigene0076050
iab-8-y	Unigene0076101
iab-8-y	Unigene0076104
iab-8-y	Unigene0076170
iab-8-y	Unigene0076182
iab-8-y	Unigene0076190
iab-8-y	Unigene0076204
iab-8-y	Unigene0076262
iab-8-y	Unigene0076363
iab-8-y	Unigene0076487
iab-8-y	Unigene0076600
iab-8-y	Unigene0076605
iab-8-y	Unigene0076648
iab-8-y	Unigene0076713
iab-8-y	Unigene0076714
iab-8-y	Unigene0076887
iab-8-y	Unigene0076898
iab-8-y	Unigene0076961
iab-8-y	Unigene0076972
iab-8-y	Unigene0076981
iab-8-y	Unigene0077215
iab-8-y	Unigene0077520
iab-8-y	Unigene0077580
iab-8-y	Unigene0077597
iab-8-y	Unigene0077611
iab-8-y	Unigene0077771
iab-8-y	Unigene0077832
iab-8-y	Unigene0077845
iab-8-y	Unigene0077912
iab-8-y	Unigene0077945
iab-8-y	Unigene0078222
iab-8-y	Unigene0078265
iab-8-y	Unigene0078291
iab-8-y	Unigene0078750
iab-8-y	Unigene0078789
iab-8-y	Unigene0078933
iab-8-y	Unigene0079287
iab-8-y	Unigene0079681
iab-8-y	Unigene0079835
iab-8-y	Unigene0080312
iab-8-y	Unigene0080350
iab-8-y	Unigene0080549
iab-8-y	Unigene0080702
iab-8-y	Unigene0080973
iab-8-y	Unigene0081098
iab-8-y	Unigene0081442
iab-8-y	Unigene0081469
iab-8-y	Unigene0082326
iab-8-y	Unigene0083996
iab-8-y	Unigene0084556
iab-8-y	Unigene0089796
iab-8-y	Unigene0097324
iab-8-y	Unigene0097536
iab-8-y	Unigene0098480
iab-8-y	Unigene0104072
iab-8-y	Unigene0105539
iab-8-y	Unigene0108884
iab-8-y	Unigene0113131
iab-8-y	Unigene0113848
iab-8-y	Unigene0119219
miR-11942-y	Unigene0000003
miR-11942-y	Unigene0000100
miR-11942-y	Unigene0000105
miR-11942-y	Unigene0000159
miR-11942-y	Unigene0000183
miR-11942-y	Unigene0000372
miR-11942-y	Unigene0000494
miR-11942-y	Unigene0000533
miR-11942-y	Unigene0000582
miR-11942-y	Unigene0000623
miR-11942-y	Unigene0000755
miR-11942-y	Unigene0000901
miR-11942-y	Unigene0000916
miR-11942-y	Unigene0000937
miR-11942-y	Unigene0000946
miR-11942-y	Unigene0000948
miR-11942-y	Unigene0000966
miR-11942-y	Unigene0000967
miR-11942-y	Unigene0000986
miR-11942-y	Unigene0001026
miR-11942-y	Unigene0001082
miR-11942-y	Unigene0001104
miR-11942-y	Unigene0001128
miR-11942-y	Unigene0001140
miR-11942-y	Unigene0001154
miR-11942-y	Unigene0001176
miR-11942-y	Unigene0001189
miR-11942-y	Unigene0001208
miR-11942-y	Unigene0001233
miR-11942-y	Unigene0001241
miR-11942-y	Unigene0001299
miR-11942-y	Unigene0001306
miR-11942-y	Unigene0001408
miR-11942-y	Unigene0001440
miR-11942-y	Unigene0001447
miR-11942-y	Unigene0001465
miR-11942-y	Unigene0001491
miR-11942-y	Unigene0001522
miR-11942-y	Unigene0001619
miR-11942-y	Unigene0001657
miR-11942-y	Unigene0001675
miR-11942-y	Unigene0001707
miR-11942-y	Unigene0001785
miR-11942-y	Unigene0001797
miR-11942-y	Unigene0001825
miR-11942-y	Unigene0001874
miR-11942-y	Unigene0001878
miR-11942-y	Unigene0001881
miR-11942-y	Unigene0001884
miR-11942-y	Unigene0001900
miR-11942-y	Unigene0001922
miR-11942-y	Unigene0001945
miR-11942-y	Unigene0001962
miR-11942-y	Unigene0002051
miR-11942-y	Unigene0002159
miR-11942-y	Unigene0002182
miR-11942-y	Unigene0002225
miR-11942-y	Unigene0002233
miR-11942-y	Unigene0002256
miR-11942-y	Unigene0002270
miR-11942-y	Unigene0002318
miR-11942-y	Unigene0002348
miR-11942-y	Unigene0002349
miR-11942-y	Unigene0002381
miR-11942-y	Unigene0002410
miR-11942-y	Unigene0002471
miR-11942-y	Unigene0002492
miR-11942-y	Unigene0002498
miR-11942-y	Unigene0002548
miR-11942-y	Unigene0002651
miR-11942-y	Unigene0002657
miR-11942-y	Unigene0002660
miR-11942-y	Unigene0002728
miR-11942-y	Unigene0002758
miR-11942-y	Unigene0002790
miR-11942-y	Unigene0002830
miR-11942-y	Unigene0002857
miR-11942-y	Unigene0002924
miR-11942-y	Unigene0002953
miR-11942-y	Unigene0003041
miR-11942-y	Unigene0003091
miR-11942-y	Unigene0003116
miR-11942-y	Unigene0003126
miR-11942-y	Unigene0003137
miR-11942-y	Unigene0003150
miR-11942-y	Unigene0003179
miR-11942-y	Unigene0003191
miR-11942-y	Unigene0003198
miR-11942-y	Unigene0003400
miR-11942-y	Unigene0003528
miR-11942-y	Unigene0003529
miR-11942-y	Unigene0003641
miR-11942-y	Unigene0003675
miR-11942-y	Unigene0003733
miR-11942-y	Unigene0003734
miR-11942-y	Unigene0003747
miR-11942-y	Unigene0003766
miR-11942-y	Unigene0003771
miR-11942-y	Unigene0003802
miR-11942-y	Unigene0003825
miR-11942-y	Unigene0003829
miR-11942-y	Unigene0003865
miR-11942-y	Unigene0003895
miR-11942-y	Unigene0003939
miR-11942-y	Unigene0003996
miR-11942-y	Unigene0004009
miR-11942-y	Unigene0004017
miR-11942-y	Unigene0004205
miR-11942-y	Unigene0004208
miR-11942-y	Unigene0004273
miR-11942-y	Unigene0004299
miR-11942-y	Unigene0004305
miR-11942-y	Unigene0004311
miR-11942-y	Unigene0004313
miR-11942-y	Unigene0004328
miR-11942-y	Unigene0004370
miR-11942-y	Unigene0004383
miR-11942-y	Unigene0004419
miR-11942-y	Unigene0004456
miR-11942-y	Unigene0004472
miR-11942-y	Unigene0004487
miR-11942-y	Unigene0004579
miR-11942-y	Unigene0004581
miR-11942-y	Unigene0004652
miR-11942-y	Unigene0004656
miR-11942-y	Unigene0004660
miR-11942-y	Unigene0004710
miR-11942-y	Unigene0004878
miR-11942-y	Unigene0004955
miR-11942-y	Unigene0004972
miR-11942-y	Unigene0005008
miR-11942-y	Unigene0005048
miR-11942-y	Unigene0005085
miR-11942-y	Unigene0005095
miR-11942-y	Unigene0005117
miR-11942-y	Unigene0005156
miR-11942-y	Unigene0005195
miR-11942-y	Unigene0005205
miR-11942-y	Unigene0005274
miR-11942-y	Unigene0005298
miR-11942-y	Unigene0005337
miR-11942-y	Unigene0005442
miR-11942-y	Unigene0005522
miR-11942-y	Unigene0005605
miR-11942-y	Unigene0005674
miR-11942-y	Unigene0005776
miR-11942-y	Unigene0005790
miR-11942-y	Unigene0005795
miR-11942-y	Unigene0005804
miR-11942-y	Unigene0005827
miR-11942-y	Unigene0005836
miR-11942-y	Unigene0005856
miR-11942-y	Unigene0005929
miR-11942-y	Unigene0005969
miR-11942-y	Unigene0006031
miR-11942-y	Unigene0006047
miR-11942-y	Unigene0006081
miR-11942-y	Unigene0006179
miR-11942-y	Unigene0006185
miR-11942-y	Unigene0006217
miR-11942-y	Unigene0006245
miR-11942-y	Unigene0006257
miR-11942-y	Unigene0006393
miR-11942-y	Unigene0006416
miR-11942-y	Unigene0006421
miR-11942-y	Unigene0006469
miR-11942-y	Unigene0006598
miR-11942-y	Unigene0006643
miR-11942-y	Unigene0006722
miR-11942-y	Unigene0006764
miR-11942-y	Unigene0006801
miR-11942-y	Unigene0006809
miR-11942-y	Unigene0006878
miR-11942-y	Unigene0006896
miR-11942-y	Unigene0006935
miR-11942-y	Unigene0006938
miR-11942-y	Unigene0006947
miR-11942-y	Unigene0006977
miR-11942-y	Unigene0007419
miR-11942-y	Unigene0007451
miR-11942-y	Unigene0007465
miR-11942-y	Unigene0007515
miR-11942-y	Unigene0007544
miR-11942-y	Unigene0007563
miR-11942-y	Unigene0007565
miR-11942-y	Unigene0007621
miR-11942-y	Unigene0007780
miR-11942-y	Unigene0007845
miR-11942-y	Unigene0007867
miR-11942-y	Unigene0007887
miR-11942-y	Unigene0007957
miR-11942-y	Unigene0007963
miR-11942-y	Unigene0008026
miR-11942-y	Unigene0008037
miR-11942-y	Unigene0008053
miR-11942-y	Unigene0008061
miR-11942-y	Unigene0008144
miR-11942-y	Unigene0008150
miR-11942-y	Unigene0008199
miR-11942-y	Unigene0008214
miR-11942-y	Unigene0008245
miR-11942-y	Unigene0008307
miR-11942-y	Unigene0008372
miR-11942-y	Unigene0008382
miR-11942-y	Unigene0008384
miR-11942-y	Unigene0008423
miR-11942-y	Unigene0008443
miR-11942-y	Unigene0008448
miR-11942-y	Unigene0008480
miR-11942-y	Unigene0008481
miR-11942-y	Unigene0008519
miR-11942-y	Unigene0008531
miR-11942-y	Unigene0008563
miR-11942-y	Unigene0008596
miR-11942-y	Unigene0008626
miR-11942-y	Unigene0008632
miR-11942-y	Unigene0008645
miR-11942-y	Unigene0008651
miR-11942-y	Unigene0008660
miR-11942-y	Unigene0008678
miR-11942-y	Unigene0008679
miR-11942-y	Unigene0008698
miR-11942-y	Unigene0008709
miR-11942-y	Unigene0008714
miR-11942-y	Unigene0008731
miR-11942-y	Unigene0008742
miR-11942-y	Unigene0008752
miR-11942-y	Unigene0008764
miR-11942-y	Unigene0008790
miR-11942-y	Unigene0008796
miR-11942-y	Unigene0008797
miR-11942-y	Unigene0008801
miR-11942-y	Unigene0008808
miR-11942-y	Unigene0008816
miR-11942-y	Unigene0008817
miR-11942-y	Unigene0008821
miR-11942-y	Unigene0008859
miR-11942-y	Unigene0008867
miR-11942-y	Unigene0008906
miR-11942-y	Unigene0008923
miR-11942-y	Unigene0008934
miR-11942-y	Unigene0008937
miR-11942-y	Unigene0008956
miR-11942-y	Unigene0008975
miR-11942-y	Unigene0008976
miR-11942-y	Unigene0008980
miR-11942-y	Unigene0008988
miR-11942-y	Unigene0009018
miR-11942-y	Unigene0009040
miR-11942-y	Unigene0009049
miR-11942-y	Unigene0009101
miR-11942-y	Unigene0009118
miR-11942-y	Unigene0009153
miR-11942-y	Unigene0009249
miR-11942-y	Unigene0009259
miR-11942-y	Unigene0009285
miR-11942-y	Unigene0009380
miR-11942-y	Unigene0009390
miR-11942-y	Unigene0009507
miR-11942-y	Unigene0009546
miR-11942-y	Unigene0009568
miR-11942-y	Unigene0009589
miR-11942-y	Unigene0009622
miR-11942-y	Unigene0009658
miR-11942-y	Unigene0009740
miR-11942-y	Unigene0009744
miR-11942-y	Unigene0009868
miR-11942-y	Unigene0009876
miR-11942-y	Unigene0010018
miR-11942-y	Unigene0010072
miR-11942-y	Unigene0010211
miR-11942-y	Unigene0010263
miR-11942-y	Unigene0010271
miR-11942-y	Unigene0010283
miR-11942-y	Unigene0010315
miR-11942-y	Unigene0010439
miR-11942-y	Unigene0010479
miR-11942-y	Unigene0010491
miR-11942-y	Unigene0010500
miR-11942-y	Unigene0010667
miR-11942-y	Unigene0010691
miR-11942-y	Unigene0010694
miR-11942-y	Unigene0010697
miR-11942-y	Unigene0010720
miR-11942-y	Unigene0010736
miR-11942-y	Unigene0010741
miR-11942-y	Unigene0010758
miR-11942-y	Unigene0010789
miR-11942-y	Unigene0010797
miR-11942-y	Unigene0010801
miR-11942-y	Unigene0010830
miR-11942-y	Unigene0010833
miR-11942-y	Unigene0010846
miR-11942-y	Unigene0010893
miR-11942-y	Unigene0010944
miR-11942-y	Unigene0010985
miR-11942-y	Unigene0011002
miR-11942-y	Unigene0011040
miR-11942-y	Unigene0011043
miR-11942-y	Unigene0011081
miR-11942-y	Unigene0011092
miR-11942-y	Unigene0011152
miR-11942-y	Unigene0011164
miR-11942-y	Unigene0011169
miR-11942-y	Unigene0011227
miR-11942-y	Unigene0011279
miR-11942-y	Unigene0011309
miR-11942-y	Unigene0011315
miR-11942-y	Unigene0011342
miR-11942-y	Unigene0011359
miR-11942-y	Unigene0011402
miR-11942-y	Unigene0011458
miR-11942-y	Unigene0011460
miR-11942-y	Unigene0011524
miR-11942-y	Unigene0011563
miR-11942-y	Unigene0011645
miR-11942-y	Unigene0011646
miR-11942-y	Unigene0011665
miR-11942-y	Unigene0011722
miR-11942-y	Unigene0011787
miR-11942-y	Unigene0011795
miR-11942-y	Unigene0011802
miR-11942-y	Unigene0011826
miR-11942-y	Unigene0011836
miR-11942-y	Unigene0011857
miR-11942-y	Unigene0011870
miR-11942-y	Unigene0011926
miR-11942-y	Unigene0011929
miR-11942-y	Unigene0011949
miR-11942-y	Unigene0012028
miR-11942-y	Unigene0012049
miR-11942-y	Unigene0012079
miR-11942-y	Unigene0012101
miR-11942-y	Unigene0012120
miR-11942-y	Unigene0012157
miR-11942-y	Unigene0012164
miR-11942-y	Unigene0012181
miR-11942-y	Unigene0012203
miR-11942-y	Unigene0012216
miR-11942-y	Unigene0012237
miR-11942-y	Unigene0012243
miR-11942-y	Unigene0012258
miR-11942-y	Unigene0012263
miR-11942-y	Unigene0012320
miR-11942-y	Unigene0012355
miR-11942-y	Unigene0012405
miR-11942-y	Unigene0012453
miR-11942-y	Unigene0012494
miR-11942-y	Unigene0012518
miR-11942-y	Unigene0012537
miR-11942-y	Unigene0012542
miR-11942-y	Unigene0012597
miR-11942-y	Unigene0012645
miR-11942-y	Unigene0012656
miR-11942-y	Unigene0012699
miR-11942-y	Unigene0012700
miR-11942-y	Unigene0012776
miR-11942-y	Unigene0012793
miR-11942-y	Unigene0012807
miR-11942-y	Unigene0012821
miR-11942-y	Unigene0012898
miR-11942-y	Unigene0013001
miR-11942-y	Unigene0013066
miR-11942-y	Unigene0013067
miR-11942-y	Unigene0013075
miR-11942-y	Unigene0013115
miR-11942-y	Unigene0013160
miR-11942-y	Unigene0013220
miR-11942-y	Unigene0013246
miR-11942-y	Unigene0013252
miR-11942-y	Unigene0013281
miR-11942-y	Unigene0013314
miR-11942-y	Unigene0013318
miR-11942-y	Unigene0013371
miR-11942-y	Unigene0013600
miR-11942-y	Unigene0013622
miR-11942-y	Unigene0013731
miR-11942-y	Unigene0013740
miR-11942-y	Unigene0013774
miR-11942-y	Unigene0013787
miR-11942-y	Unigene0013796
miR-11942-y	Unigene0013812
miR-11942-y	Unigene0013822
miR-11942-y	Unigene0013890
miR-11942-y	Unigene0013891
miR-11942-y	Unigene0013911
miR-11942-y	Unigene0013922
miR-11942-y	Unigene0013931
miR-11942-y	Unigene0013971
miR-11942-y	Unigene0014009
miR-11942-y	Unigene0014062
miR-11942-y	Unigene0014102
miR-11942-y	Unigene0014106
miR-11942-y	Unigene0014242
miR-11942-y	Unigene0014243
miR-11942-y	Unigene0014262
miR-11942-y	Unigene0014291
miR-11942-y	Unigene0014422
miR-11942-y	Unigene0014509
miR-11942-y	Unigene0014637
miR-11942-y	Unigene0014659
miR-11942-y	Unigene0014714
miR-11942-y	Unigene0014772
miR-11942-y	Unigene0014820
miR-11942-y	Unigene0014829
miR-11942-y	Unigene0014832
miR-11942-y	Unigene0014837
miR-11942-y	Unigene0014985
miR-11942-y	Unigene0015003
miR-11942-y	Unigene0015062
miR-11942-y	Unigene0015130
miR-11942-y	Unigene0015224
miR-11942-y	Unigene0015332
miR-11942-y	Unigene0015346
miR-11942-y	Unigene0015350
miR-11942-y	Unigene0015436
miR-11942-y	Unigene0015478
miR-11942-y	Unigene0015499
miR-11942-y	Unigene0015571
miR-11942-y	Unigene0015766
miR-11942-y	Unigene0015785
miR-11942-y	Unigene0015795
miR-11942-y	Unigene0015844
miR-11942-y	Unigene0015889
miR-11942-y	Unigene0015963
miR-11942-y	Unigene0016023
miR-11942-y	Unigene0016100
miR-11942-y	Unigene0016119
miR-11942-y	Unigene0016285
miR-11942-y	Unigene0022033
miR-11942-y	Unigene0022034
miR-11942-y	Unigene0022429
miR-11942-y	Unigene0024504
miR-11942-y	Unigene0025801
miR-11942-y	Unigene0026647
miR-11942-y	Unigene0027639
miR-11942-y	Unigene0030413
miR-11942-y	Unigene0030414
miR-11942-y	Unigene0031056
miR-11942-y	Unigene0031484
miR-11942-y	Unigene0031643
miR-11942-y	Unigene0032106
miR-11942-y	Unigene0032230
miR-11942-y	Unigene0032988
miR-11942-y	Unigene0033677
miR-11942-y	Unigene0034023
miR-11942-y	Unigene0034167
miR-11942-y	Unigene0034187
miR-11942-y	Unigene0035061
miR-11942-y	Unigene0035297
miR-11942-y	Unigene0036533
miR-11942-y	Unigene0036822
miR-11942-y	Unigene0036823
miR-11942-y	Unigene0037925
miR-11942-y	Unigene0038727
miR-11942-y	Unigene0039209
miR-11942-y	Unigene0039210
miR-11942-y	Unigene0039229
miR-11942-y	Unigene0039645
miR-11942-y	Unigene0040167
miR-11942-y	Unigene0040541
miR-11942-y	Unigene0040902
miR-11942-y	Unigene0041044
miR-11942-y	Unigene0041185
miR-11942-y	Unigene0041197
miR-11942-y	Unigene0041547
miR-11942-y	Unigene0042509
miR-11942-y	Unigene0042551
miR-11942-y	Unigene0042633
miR-11942-y	Unigene0042819
miR-11942-y	Unigene0042847
miR-11942-y	Unigene0043013
miR-11942-y	Unigene0043131
miR-11942-y	Unigene0043244
miR-11942-y	Unigene0043957
miR-11942-y	Unigene0044101
miR-11942-y	Unigene0044400
miR-11942-y	Unigene0044551
miR-11942-y	Unigene0044754
miR-11942-y	Unigene0044799
miR-11942-y	Unigene0044895
miR-11942-y	Unigene0045126
miR-11942-y	Unigene0045287
miR-11942-y	Unigene0045427
miR-11942-y	Unigene0045539
miR-11942-y	Unigene0045540
miR-11942-y	Unigene0045557
miR-11942-y	Unigene0045603
miR-11942-y	Unigene0045683
miR-11942-y	Unigene0045684
miR-11942-y	Unigene0045807
miR-11942-y	Unigene0045871
miR-11942-y	Unigene0045887
miR-11942-y	Unigene0046104
miR-11942-y	Unigene0046142
miR-11942-y	Unigene0046192
miR-11942-y	Unigene0046206
miR-11942-y	Unigene0046213
miR-11942-y	Unigene0046308
miR-11942-y	Unigene0046309
miR-11942-y	Unigene0046350
miR-11942-y	Unigene0046392
miR-11942-y	Unigene0046456
miR-11942-y	Unigene0046513
miR-11942-y	Unigene0046651
miR-11942-y	Unigene0046743
miR-11942-y	Unigene0046746
miR-11942-y	Unigene0046775
miR-11942-y	Unigene0046776
miR-11942-y	Unigene0046798
miR-11942-y	Unigene0046937
miR-11942-y	Unigene0046938
miR-11942-y	Unigene0046950
miR-11942-y	Unigene0046961
miR-11942-y	Unigene0046976
miR-11942-y	Unigene0047082
miR-11942-y	Unigene0047084
miR-11942-y	Unigene0047242
miR-11942-y	Unigene0047396
miR-11942-y	Unigene0047466
miR-11942-y	Unigene0047480
miR-11942-y	Unigene0047490
miR-11942-y	Unigene0047599
miR-11942-y	Unigene0047663
miR-11942-y	Unigene0047672
miR-11942-y	Unigene0047714
miR-11942-y	Unigene0047764
miR-11942-y	Unigene0047874
miR-11942-y	Unigene0047926
miR-11942-y	Unigene0047941
miR-11942-y	Unigene0048058
miR-11942-y	Unigene0048093
miR-11942-y	Unigene0048117
miR-11942-y	Unigene0048135
miR-11942-y	Unigene0048143
miR-11942-y	Unigene0048173
miR-11942-y	Unigene0048246
miR-11942-y	Unigene0048263
miR-11942-y	Unigene0048270
miR-11942-y	Unigene0048314
miR-11942-y	Unigene0048415
miR-11942-y	Unigene0048438
miR-11942-y	Unigene0048452
miR-11942-y	Unigene0048457
miR-11942-y	Unigene0048477
miR-11942-y	Unigene0048491
miR-11942-y	Unigene0048528
miR-11942-y	Unigene0048550
miR-11942-y	Unigene0048608
miR-11942-y	Unigene0048610
miR-11942-y	Unigene0048643
miR-11942-y	Unigene0048687
miR-11942-y	Unigene0048688
miR-11942-y	Unigene0048737
miR-11942-y	Unigene0048820
miR-11942-y	Unigene0048825
miR-11942-y	Unigene0048826
miR-11942-y	Unigene0048881
miR-11942-y	Unigene0048918
miR-11942-y	Unigene0048959
miR-11942-y	Unigene0048976
miR-11942-y	Unigene0048996
miR-11942-y	Unigene0049011
miR-11942-y	Unigene0049058
miR-11942-y	Unigene0049066
miR-11942-y	Unigene0049088
miR-11942-y	Unigene0049156
miR-11942-y	Unigene0049331
miR-11942-y	Unigene0049347
miR-11942-y	Unigene0049369
miR-11942-y	Unigene0049374
miR-11942-y	Unigene0049405
miR-11942-y	Unigene0049437
miR-11942-y	Unigene0049450
miR-11942-y	Unigene0049467
miR-11942-y	Unigene0049487
miR-11942-y	Unigene0049517
miR-11942-y	Unigene0049525
miR-11942-y	Unigene0049530
miR-11942-y	Unigene0049541
miR-11942-y	Unigene0049546
miR-11942-y	Unigene0049548
miR-11942-y	Unigene0049612
miR-11942-y	Unigene0049618
miR-11942-y	Unigene0049652
miR-11942-y	Unigene0049739
miR-11942-y	Unigene0049772
miR-11942-y	Unigene0049779
miR-11942-y	Unigene0049827
miR-11942-y	Unigene0049865
miR-11942-y	Unigene0049910
miR-11942-y	Unigene0049944
miR-11942-y	Unigene0049990
miR-11942-y	Unigene0050014
miR-11942-y	Unigene0050018
miR-11942-y	Unigene0050044
miR-11942-y	Unigene0050079
miR-11942-y	Unigene0050135
miR-11942-y	Unigene0050143
miR-11942-y	Unigene0050159
miR-11942-y	Unigene0050177
miR-11942-y	Unigene0050274
miR-11942-y	Unigene0050275
miR-11942-y	Unigene0050279
miR-11942-y	Unigene0050351
miR-11942-y	Unigene0050395
miR-11942-y	Unigene0050397
miR-11942-y	Unigene0050442
miR-11942-y	Unigene0050473
miR-11942-y	Unigene0050490
miR-11942-y	Unigene0050501
miR-11942-y	Unigene0050522
miR-11942-y	Unigene0050536
miR-11942-y	Unigene0050585
miR-11942-y	Unigene0050641
miR-11942-y	Unigene0050702
miR-11942-y	Unigene0050720
miR-11942-y	Unigene0050733
miR-11942-y	Unigene0050757
miR-11942-y	Unigene0050804
miR-11942-y	Unigene0050876
miR-11942-y	Unigene0050908
miR-11942-y	Unigene0050914
miR-11942-y	Unigene0050954
miR-11942-y	Unigene0050957
miR-11942-y	Unigene0050970
miR-11942-y	Unigene0050977
miR-11942-y	Unigene0051016
miR-11942-y	Unigene0051024
miR-11942-y	Unigene0051050
miR-11942-y	Unigene0051180
miR-11942-y	Unigene0051196
miR-11942-y	Unigene0051216
miR-11942-y	Unigene0051225
miR-11942-y	Unigene0051268
miR-11942-y	Unigene0051469
miR-11942-y	Unigene0051484
miR-11942-y	Unigene0051528
miR-11942-y	Unigene0051553
miR-11942-y	Unigene0051639
miR-11942-y	Unigene0051686
miR-11942-y	Unigene0051692
miR-11942-y	Unigene0051719
miR-11942-y	Unigene0051736
miR-11942-y	Unigene0051781
miR-11942-y	Unigene0051788
miR-11942-y	Unigene0051792
miR-11942-y	Unigene0051801
miR-11942-y	Unigene0051881
miR-11942-y	Unigene0051891
miR-11942-y	Unigene0051905
miR-11942-y	Unigene0051954
miR-11942-y	Unigene0051955
miR-11942-y	Unigene0052014
miR-11942-y	Unigene0052022
miR-11942-y	Unigene0052108
miR-11942-y	Unigene0052136
miR-11942-y	Unigene0052137
miR-11942-y	Unigene0052167
miR-11942-y	Unigene0052238
miR-11942-y	Unigene0052239
miR-11942-y	Unigene0052255
miR-11942-y	Unigene0052292
miR-11942-y	Unigene0052354
miR-11942-y	Unigene0052358
miR-11942-y	Unigene0052363
miR-11942-y	Unigene0052375
miR-11942-y	Unigene0052409
miR-11942-y	Unigene0052426
miR-11942-y	Unigene0052447
miR-11942-y	Unigene0052521
miR-11942-y	Unigene0052565
miR-11942-y	Unigene0052568
miR-11942-y	Unigene0052572
miR-11942-y	Unigene0052603
miR-11942-y	Unigene0052629
miR-11942-y	Unigene0052669
miR-11942-y	Unigene0052681
miR-11942-y	Unigene0052694
miR-11942-y	Unigene0052714
miR-11942-y	Unigene0052719
miR-11942-y	Unigene0052728
miR-11942-y	Unigene0052732
miR-11942-y	Unigene0052780
miR-11942-y	Unigene0052787
miR-11942-y	Unigene0052912
miR-11942-y	Unigene0052928
miR-11942-y	Unigene0052934
miR-11942-y	Unigene0053109
miR-11942-y	Unigene0053149
miR-11942-y	Unigene0053198
miR-11942-y	Unigene0053255
miR-11942-y	Unigene0053280
miR-11942-y	Unigene0053336
miR-11942-y	Unigene0053342
miR-11942-y	Unigene0053425
miR-11942-y	Unigene0053448
miR-11942-y	Unigene0053477
miR-11942-y	Unigene0053487
miR-11942-y	Unigene0053541
miR-11942-y	Unigene0053553
miR-11942-y	Unigene0053559
miR-11942-y	Unigene0053598
miR-11942-y	Unigene0053603
miR-11942-y	Unigene0053621
miR-11942-y	Unigene0053660
miR-11942-y	Unigene0053728
miR-11942-y	Unigene0053730
miR-11942-y	Unigene0053745
miR-11942-y	Unigene0053769
miR-11942-y	Unigene0053795
miR-11942-y	Unigene0053801
miR-11942-y	Unigene0053817
miR-11942-y	Unigene0053848
miR-11942-y	Unigene0053891
miR-11942-y	Unigene0053892
miR-11942-y	Unigene0053963
miR-11942-y	Unigene0053974
miR-11942-y	Unigene0053999
miR-11942-y	Unigene0054048
miR-11942-y	Unigene0054051
miR-11942-y	Unigene0054053
miR-11942-y	Unigene0054113
miR-11942-y	Unigene0054277
miR-11942-y	Unigene0054281
miR-11942-y	Unigene0054310
miR-11942-y	Unigene0054327
miR-11942-y	Unigene0054335
miR-11942-y	Unigene0054416
miR-11942-y	Unigene0054500
miR-11942-y	Unigene0054583
miR-11942-y	Unigene0054597
miR-11942-y	Unigene0054699
miR-11942-y	Unigene0054712
miR-11942-y	Unigene0054747
miR-11942-y	Unigene0054763
miR-11942-y	Unigene0054767
miR-11942-y	Unigene0054776
miR-11942-y	Unigene0054798
miR-11942-y	Unigene0054842
miR-11942-y	Unigene0054867
miR-11942-y	Unigene0054954
miR-11942-y	Unigene0055045
miR-11942-y	Unigene0055090
miR-11942-y	Unigene0055143
miR-11942-y	Unigene0055176
miR-11942-y	Unigene0055274
miR-11942-y	Unigene0055310
miR-11942-y	Unigene0055313
miR-11942-y	Unigene0055320
miR-11942-y	Unigene0055459
miR-11942-y	Unigene0055534
miR-11942-y	Unigene0055634
miR-11942-y	Unigene0055669
miR-11942-y	Unigene0055680
miR-11942-y	Unigene0055682
miR-11942-y	Unigene0055798
miR-11942-y	Unigene0055814
miR-11942-y	Unigene0055821
miR-11942-y	Unigene0055834
miR-11942-y	Unigene0055862
miR-11942-y	Unigene0055875
miR-11942-y	Unigene0055884
miR-11942-y	Unigene0055905
miR-11942-y	Unigene0055969
miR-11942-y	Unigene0055982
miR-11942-y	Unigene0056012
miR-11942-y	Unigene0056065
miR-11942-y	Unigene0056091
miR-11942-y	Unigene0056305
miR-11942-y	Unigene0056366
miR-11942-y	Unigene0056370
miR-11942-y	Unigene0056412
miR-11942-y	Unigene0056428
miR-11942-y	Unigene0056451
miR-11942-y	Unigene0056454
miR-11942-y	Unigene0056460
miR-11942-y	Unigene0056473
miR-11942-y	Unigene0056521
miR-11942-y	Unigene0056537
miR-11942-y	Unigene0056606
miR-11942-y	Unigene0056610
miR-11942-y	Unigene0056611
miR-11942-y	Unigene0056634
miR-11942-y	Unigene0056674
miR-11942-y	Unigene0056692
miR-11942-y	Unigene0056730
miR-11942-y	Unigene0056734
miR-11942-y	Unigene0056796
miR-11942-y	Unigene0056812
miR-11942-y	Unigene0056879
miR-11942-y	Unigene0056883
miR-11942-y	Unigene0056888
miR-11942-y	Unigene0056900
miR-11942-y	Unigene0056921
miR-11942-y	Unigene0057081
miR-11942-y	Unigene0057103
miR-11942-y	Unigene0057129
miR-11942-y	Unigene0057130
miR-11942-y	Unigene0057140
miR-11942-y	Unigene0057141
miR-11942-y	Unigene0057166
miR-11942-y	Unigene0057220
miR-11942-y	Unigene0057243
miR-11942-y	Unigene0057249
miR-11942-y	Unigene0057269
miR-11942-y	Unigene0057342
miR-11942-y	Unigene0057349
miR-11942-y	Unigene0057363
miR-11942-y	Unigene0057379
miR-11942-y	Unigene0057398
miR-11942-y	Unigene0057404
miR-11942-y	Unigene0057469
miR-11942-y	Unigene0057491
miR-11942-y	Unigene0057512
miR-11942-y	Unigene0057604
miR-11942-y	Unigene0057605
miR-11942-y	Unigene0057607
miR-11942-y	Unigene0057617
miR-11942-y	Unigene0057632
miR-11942-y	Unigene0057646
miR-11942-y	Unigene0057670
miR-11942-y	Unigene0057680
miR-11942-y	Unigene0057700
miR-11942-y	Unigene0057706
miR-11942-y	Unigene0057721
miR-11942-y	Unigene0057740
miR-11942-y	Unigene0057746
miR-11942-y	Unigene0057759
miR-11942-y	Unigene0057777
miR-11942-y	Unigene0057804
miR-11942-y	Unigene0057808
miR-11942-y	Unigene0057845
miR-11942-y	Unigene0057850
miR-11942-y	Unigene0057929
miR-11942-y	Unigene0057946
miR-11942-y	Unigene0058136
miR-11942-y	Unigene0058190
miR-11942-y	Unigene0058199
miR-11942-y	Unigene0058217
miR-11942-y	Unigene0058221
miR-11942-y	Unigene0058376
miR-11942-y	Unigene0058389
miR-11942-y	Unigene0058391
miR-11942-y	Unigene0058404
miR-11942-y	Unigene0058413
miR-11942-y	Unigene0058444
miR-11942-y	Unigene0058452
miR-11942-y	Unigene0058479
miR-11942-y	Unigene0058510
miR-11942-y	Unigene0058511
miR-11942-y	Unigene0058518
miR-11942-y	Unigene0058540
miR-11942-y	Unigene0058574
miR-11942-y	Unigene0058611
miR-11942-y	Unigene0058706
miR-11942-y	Unigene0058740
miR-11942-y	Unigene0058750
miR-11942-y	Unigene0058765
miR-11942-y	Unigene0058811
miR-11942-y	Unigene0058860
miR-11942-y	Unigene0058867
miR-11942-y	Unigene0058869
miR-11942-y	Unigene0058903
miR-11942-y	Unigene0058910
miR-11942-y	Unigene0058927
miR-11942-y	Unigene0059044
miR-11942-y	Unigene0059114
miR-11942-y	Unigene0059161
miR-11942-y	Unigene0059191
miR-11942-y	Unigene0059219
miR-11942-y	Unigene0059244
miR-11942-y	Unigene0059305
miR-11942-y	Unigene0059334
miR-11942-y	Unigene0059335
miR-11942-y	Unigene0059398
miR-11942-y	Unigene0059404
miR-11942-y	Unigene0059475
miR-11942-y	Unigene0059527
miR-11942-y	Unigene0059535
miR-11942-y	Unigene0059544
miR-11942-y	Unigene0059608
miR-11942-y	Unigene0059625
miR-11942-y	Unigene0059694
miR-11942-y	Unigene0059697
miR-11942-y	Unigene0059763
miR-11942-y	Unigene0059781
miR-11942-y	Unigene0060023
miR-11942-y	Unigene0060026
miR-11942-y	Unigene0060029
miR-11942-y	Unigene0060057
miR-11942-y	Unigene0060137
miR-11942-y	Unigene0060139
miR-11942-y	Unigene0060173
miR-11942-y	Unigene0060248
miR-11942-y	Unigene0060269
miR-11942-y	Unigene0060279
miR-11942-y	Unigene0060280
miR-11942-y	Unigene0060311
miR-11942-y	Unigene0060337
miR-11942-y	Unigene0060368
miR-11942-y	Unigene0060385
miR-11942-y	Unigene0060412
miR-11942-y	Unigene0060455
miR-11942-y	Unigene0060567
miR-11942-y	Unigene0060620
miR-11942-y	Unigene0060622
miR-11942-y	Unigene0060625
miR-11942-y	Unigene0060638
miR-11942-y	Unigene0060678
miR-11942-y	Unigene0060711
miR-11942-y	Unigene0060746
miR-11942-y	Unigene0060772
miR-11942-y	Unigene0060880
miR-11942-y	Unigene0060899
miR-11942-y	Unigene0060937
miR-11942-y	Unigene0061009
miR-11942-y	Unigene0061179
miR-11942-y	Unigene0061349
miR-11942-y	Unigene0061391
miR-11942-y	Unigene0061443
miR-11942-y	Unigene0061487
miR-11942-y	Unigene0061501
miR-11942-y	Unigene0061506
miR-11942-y	Unigene0061555
miR-11942-y	Unigene0061627
miR-11942-y	Unigene0061674
miR-11942-y	Unigene0061691
miR-11942-y	Unigene0061696
miR-11942-y	Unigene0061720
miR-11942-y	Unigene0061746
miR-11942-y	Unigene0061752
miR-11942-y	Unigene0061793
miR-11942-y	Unigene0061886
miR-11942-y	Unigene0061967
miR-11942-y	Unigene0061985
miR-11942-y	Unigene0062032
miR-11942-y	Unigene0062038
miR-11942-y	Unigene0062059
miR-11942-y	Unigene0062103
miR-11942-y	Unigene0062133
miR-11942-y	Unigene0062139
miR-11942-y	Unigene0062144
miR-11942-y	Unigene0062161
miR-11942-y	Unigene0062191
miR-11942-y	Unigene0062260
miR-11942-y	Unigene0062276
miR-11942-y	Unigene0062317
miR-11942-y	Unigene0062462
miR-11942-y	Unigene0062463
[truncated: 1,046,576+ more rows]
