# Supplementary material for: Regulation of soldier caste differentiation by microRNAs in Formosan subterranean termite (Coptotermes formosanus Shiraki)
Source: PeerJ. 2024 Feb 29;12:e16843. doi: 10.7717/peerj.16843 (PMC10909360; doi:10.7717/peerj.16843)
Supplement: Supplemental Information 7 [file peerj-12-16843-s007.xlsx]

## Sheet: Supplementary table 5. The expr
miRNA	Length	Sequence	Total	C-1	C-2	C-3	M-1	M-2	M-3	C-1 TPM	C-2 TPM	C-3 TPM	M-1 TPM	M-2 TPM	M-3 TPM	C mean	M mean	log2(FC)	P value
bantam-x	20	CCGGTTTTCACAGTGATTTG	323	42	44	47	81	46	63	4.9547	5.2306	5.2505	7.8593	5.8612	7.3114	5.14527	7.01063	0.446299	0.236356
bantam-y	23	TGAGATCATTGTGAAAGCTGATT	2531326	417565	430450	491211	357824	409782	424494	49259.4	51170.5	54874.7	34719.3	52213.6	49264.5	51768.2	45399.1	-0.189403	0.943919
iab-4-x	22	ACGTATACTGAATGTATCCTGA	176	9	8	26	13	109	11	1.0617	0.951	2.9045	1.2614	13.8885	1.2766	1.63907	5.4755	1.74012	0.0456177
iab-4-y	22	TATACCTTCAGTATACGTAACT	3	0	0	0	0	3	0	0	0	0	0	0.3823	0	0.01	0.127433	3.67167	0.685594
iab-8-x	19	TACGTATACTGAAGGTATA	8	2	0	2	0	4	0	0.2359	0	0.2234	0	0.5097	0	0.1531	0.1699	0.150212	1
iab-8-y	18	AGGATACATTCAGTAAAA	2	0	0	0	0	2	0	0	0	0	0	0.2548	0	0.01	0.0849333	3.08633	0.787432
let-7-x	22	TGAGGTAGTAGGTTGTATAGTT	312520	45321	40776	51691	73340	48154	53238	5346.44	4847.32	5774.56	7116.1	6135.68	6178.51	5322.77	6476.76	0.283095	0.247872
let-7-y	22	CTGTACAACTTGCTAACTTTCC	6508	535	536	779	1868	1433	1357	63.1131	63.7179	87.0245	181.25	182.59	157.486	71.2852	173.775	1.28555	0.000630018
lin-4-x	21	TCCCTGAGACCTAACTTGTGA	395	77	47	58	102	54	57	9.0836	5.5872	6.4794	9.8969	6.8806	6.6151	7.05007	7.79753	0.145381	0.556868
miR-10002-y	19	ACGGCAAAGGCAGAAGATA	2	0	0	0	0	0	2	0	0	0	0	0	0.2321	0.01	0.0773667	2.95171	0.787831
miR-1000-x	21	ATATTGTCCTGTCACAGCAGT	11196	1805	1892	2003	1951	1676	1869	212.933	224.915	223.761	189.303	213.552	216.906	220.536	206.587	-0.0942648	0.862266
miR-1000-y	20	TACTGCTGTTTCGGGACATA	4	0	0	2	0	2	0	0	0	0.2234	0	0.2548	0	0.0744667	0.0849333	0.189736	1
miR-10018-x	18	TCTAGTCTGGCACTGTAA	42	14	12	0	2	8	6	1.6516	1.4265	0	0.1941	1.0193	0.6963	1.02603	0.636567	-0.688694	0.609821
miR-10055-y	18	GTGGGAGGGAGGGAGGGA	8	2	0	6	0	0	0	0.2359	0	0.6703	0	0	0	0.302067	0.01	-4.9168	0.231526
miR-100-x	21	AACCCGTAGATCCGAACTTGT	4383684	591219	631741	630845	1022140	684693	823046	69745.1	75099.3	70473.6	99177.1	87242.1	95518.2	71772.7	93979.2	0.388906	0.139751
miR-10137-x	19	TTTCAGTGAGGATTATGTG	3	0	0	0	3	0	0	0	0	0	0.2911	0	0	0.01	0.0970333	3.27848	0.654617
miR-10174-y	21	ATCACATTGCCAGGGATTACC	59	8	15	28	5	3	0	0.9437	1.7832	3.128	0.4851	0.3823	0	1.95163	0.289133	-2.75488	0.00785859
miR-101-y	22	TACAGTACTGTGATAACTGACT	1629	122	399	914	41	124	29	14.3921	47.4318	102.106	3.9782	15.7998	3.3656	54.6432	7.71453	-2.82439	0.000516992
miR-1021-x	18	TGAGATCATGTGAAAGCT	2	0	0	2	0	0	0	0	0	0.2234	0	0	0	0.0744667	0.01	-2.89659	0.858126
miR-10249-y	18	GGTGGCGGTGGTGGTGGT	2	0	0	0	0	2	0	0	0	0	0	0.2548	0	0.01	0.0849333	3.08633	0.794622
miR-10253-y	18	ACTGGATTGGTTTAACCT	4	0	0	2	0	2	0	0	0	0.2234	0	0.2548	0	0.0744667	0.0849333	0.189736	1
miR-10280-x	18	GAGGGAGGGAGGGAGGGA	8	3	0	5	0	0	0	0.3539	0	0.5586	0	0	0	0.304167	0.01	-4.92679	0.221889
miR-10302-y	18	TGGGTTATGATGAAAATG	214	51	29	29	42	35	28	6.0164	3.4474	3.2397	4.0752	4.4596	3.2495	4.2345	3.9281	-0.10836	0.942995
miR-10376-y	22	CACTCGATGGTTCGAATCCATC	6	0	0	0	0	6	0	0	0	0	0	0.7645	0	0.01	0.254833	4.67148	0.422454
miR-10377-x	18	TGGAGTTGCAGAGTGGCT	2	0	2	0	0	0	0	0	0.2378	0	0	0	0	0.0792667	0.01	-2.98671	0.809115
miR-10379-y	18	AGAACGAACAAGACGATA	2	0	0	0	2	0	0	0	0	0	0.1941	0	0	0.01	0.0647	2.69377	0.79035
miR-103-y	23	AGCAGCATTGTACAGGGCTATGA	355	14	68	241	2	26	4	1.6516	8.0836	26.9228	0.1941	3.3129	0.4642	12.2193	1.32373	-3.20648	0.00349643
miR-106-x	23	CAAAGTGCTTACAGTGCAGGTAG	73	2	6	57	2	6	0	0.2359	0.7133	6.3676	0.1941	0.7645	0	2.43893	0.319533	-2.93221	0.0373424
miR-106-y	22	TACCGCACTGTGGGTACTTGCT	25	0	5	20	0	0	0	0	0.5944	2.2343	0	0	0	0.9429	0.01	-6.55903	0.00848248
miR-107-y	23	AGCAGCATTGTACAGGGCTATGA	353	14	68	239	2	26	4	1.6516	8.0836	26.6994	0.1941	3.3129	0.4642	12.1449	1.32373	-3.19766	0.00358132
miR-10925-y	18	TGCACTGAGAACTTATGT	24	5	3	5	3	2	6	0.5898	0.3566	0.5586	0.2911	0.2548	0.6963	0.501667	0.414067	-0.276866	1
miR-10926-x	18	ATCCCTCCGGTGCCTCCA	36	5	4	8	8	3	8	0.5898	0.4755	0.8937	0.7762	0.3823	0.9284	0.653	0.695633	0.0912441	0.765485
miR-10955-y	18	TCCCCGTACGGGCCACCA	146	11	22	103	0	10	0	1.2977	2.6153	11.5064	0	1.2742	0	5.1398	0.424733	-3.59708	0.00479253
miR-10-x	22	TACCCTGTAGATCCGAATTTGT	940467	143589	162201	140341	208688	131285	154363	16939	19281.9	15677.9	20248.8	16728.1	17914.5	17299.6	18297.1	0.0808779	0.51951
miR-10-y	22	AAATTCGGTTCTAGAGAGGTTT	5375	934	890	870	1116	752	813	110.182	105.8	97.1904	108.284	95.8182	94.3523	104.391	99.4849	-0.0694474	0.819438
miR-11202-x	18	TTCCGGCTCGAAGGACCA	5	0	0	5	0	0	0	0	0	0.5586	0	0	0	0.1862	0.01	-4.21878	0.640313
miR-11211-y	21	TTGGTGCATTTGTTGGTGACC	5	3	0	0	2	0	0	0.3539	0	0	0.1941	0	0	0.117967	0.0647	-0.866542	1
miR-11400-x	21	TCGGCTGTGTATCTCTGTGCC	2	0	0	2	0	0	0	0	0	0.2234	0	0	0	0.0744667	0.01	-2.89659	0.857546
miR-11625-x	18	TAAGGAGACATGAGAGGT	15	2	0	2	5	2	4	0.2359	0	0.2234	0.4851	0.2548	0.4642	0.1531	0.401367	1.39045	0.336023
miR-11665-x	18	TCTCATTTCGATGTGACT	10	0	0	2	6	2	0	0	0	0.2234	0.5822	0.2548	0	0.0744667	0.279	1.9056	0.470161
miR-1175-x	22	AAGTGGAGAAGTGGTCTCTTCA	216	2	2	5	4	203	0	0.2359	0.2378	0.5586	0.3881	25.8658	0	0.3441	8.7513	4.6686	0.00238452
miR-1175-y	21	TGAGATTCAACTCCTCCAACT	5009	500	470	666	717	2158	498	58.9842	55.872	74.4009	69.5697	274.968	57.7952	63.0857	134.111	1.08804	0.0393478
miR-1181-x	19	CGCCGTCGCCGCCCCCCGC	8	0	0	0	0	8	0	0	0	0	0	1.0193	0	0.01	0.339767	5.08647	0.281662
miR-11942-y	18	AGGCACTGGCAGTCTTGA	2	2	0	0	0	0	0	0.2359	0	0	0	0	0	0.0786333	0.01	-2.97514	0.811362
miR-11971-y	20	TGAGGGGCAGAGAGCGAGAA	6	0	0	6	0	0	0	0	0	0.6703	0	0	0	0.223433	0.01	-4.48177	0.598845
miR-11987-x	20	AGGAAACTCTGGTGGAGGTC	2	0	0	2	0	0	0	0	0	0.2234	0	0	0	0.0744667	0.01	-2.89659	0.855564
miR-11-y	22	CATCACAGGCAGAGTTCTAGTT	27310	3806	4062	4358	5635	4871	4578	448.988	482.877	486.846	546.758	620.653	531.298	472.903	566.236	0.259858	0.282192
miR-12023-x	18	GCCTCCCGCCCCCGCGCG	2	0	0	0	0	2	0	0	0	0	0	0.2548	0	0.01	0.0849333	3.08633	0.795895
miR-1207-x	18	AGGGAGGGAGGGAGGGGT	2	2	0	0	0	0	0	0.2359	0	0	0	0	0	0.0786333	0.01	-2.97514	0.813647
miR-12196-x	18	TGTAGCTCAGCTGTGACT	4	4	0	0	0	0	0	0.4719	0	0	0	0	0	0.1573	0.01	-3.97545	0.648975
miR-12212-x	19	CCGGGCGGGAGGAGTGCGG	15	2	2	2	0	5	4	0.2359	0.2378	0.2234	0	0.6371	0.4642	0.232367	0.3671	0.65977	0.681189
miR-12268-x	18	GCGGGCGGGCGGGCGGCT	4	0	0	0	0	4	0	0	0	0	0	0.5097	0	0.01	0.1699	4.08661	0.607756
miR-122-x	23	TGGAGTGTGACAATGGTGTTTGT	3702	818	1309	267	591	592	125	96.4981	155.61	29.8274	57.3441	75.4314	14.5068	93.9784	49.0941	-0.936779	0.244908
miR-122-y	22	AAACGCCATTATCACACTAAAT	8	0	3	0	0	5	0	0	0.3566	0	0	0.6371	0	0.118867	0.212367	0.837213	0.845616
miR-12300-y	18	ATGAAGAAAGTGGATGCT	2	0	0	0	2	0	0	0	0	0	0.1941	0	0	0.01	0.0647	2.69377	0.785634
miR-12308-x	18	AAGTGCATTGGATTTAAA	2	0	0	0	0	2	0	0	0	0	0	0.2548	0	0.01	0.0849333	3.08633	0.787552
miR-12377-y	18	AAAGGCAGAAGGGAAGAA	2	0	0	0	0	0	2	0	0	0	0	0	0.2321	0.01	0.0773667	2.95171	0.790052
miR-124-x	23	CGTGTTCACTGTTGGCCTTGATG	24414	3856	3793	3862	5740	3244	3919	454.886	450.899	431.436	556.946	413.344	454.818	445.74	475.036	0.0918327	0.527127
miR-124-y	20	TAAGGCACGCGGTGAATGCC	1152295	190305	196478	194234	210127	174067	187084	22450	23356.7	21698.5	20388.4	22179.2	21711.9	22501.7	21426.5	-0.0706356	0.801104
miR-125-x	21	TCCCTGAGACCCTAACTTGTG	2217648	351434	355482	372300	426099	330839	381494	41458.1	42258.5	41590.8	41343.9	42154.8	44274.1	41769.1	42590.9	0.0281099	0.601912
miR-125-y	21	ACAGGCTAGAATCTCAGGTAT	4436	310	305	486	1443	1002	890	36.5702	36.2574	54.2925	140.013	127.673	103.288	42.3734	123.658	1.54513	0.000189282
miR-1260-x	18	ATCCCACCGCTGCCACCA	1154	182	152	382	172	140	126	21.4702	18.0693	42.6744	16.689	17.8385	14.6229	27.4046	16.3835	-0.742179	0.26398
miR-126-x	21	CATTATTACTTTTGGTACGCG	575	45	151	290	25	49	15	5.3086	17.9504	32.3968	2.4257	6.2435	1.7408	18.5519	3.47	-2.41856	0.00155255
miR-126-y	22	TCGTACCGTGAGTAATAATGCG	440	31	87	252	21	26	23	3.657	10.3423	28.1517	2.0376	3.3129	2.6693	14.0503	2.67327	-2.39393	0.00206524
miR-1271-x	22	CTTGGCACCTAGCAAGCACTCA	24	0	8	14	0	2	0	0	0.951	1.564	0	0.2548	0	0.838333	0.0849333	-3.30312	0.0642732
miR-1277-y	20	TACGTAGATATATATGTATT	3	0	0	3	0	0	0	0	0	0.3351	0	0	0	0.1117	0.01	-3.48156	0.705149
miR-128-y	21	TCACAGTGAACCGGTCTCTTT	95	4	13	68	0	8	2	0.4719	1.5454	7.5965	0	1.0193	0.2321	3.2046	0.417133	-2.94156	0.0176767
miR-12-x	24	TGAGTATTACATCAGGTACTGGTT	2673	345	467	481	461	527	392	40.6991	55.5154	53.734	44.7303	67.1492	45.4934	49.9828	52.4576	0.06972	0.613865
miR-12-z	22	TGAGTATTACATCAGGTACTGG	161632	23794	25880	27334	25042	36764	22818	2806.94	3076.53	3053.56	2429.8	4684.39	2648.13	2979.01	3254.11	0.127429	0.501558
miR-1301-y	22	CAGCTGCCTGGGAGTGACTTCA	4	0	0	2	0	0	2	0	0	0.2234	0	0	0.2321	0.0744667	0.0773667	0.0551173	1
miR-1307-x	21	TCGACCGGACCTCGACCGGCT	48	2	18	24	0	4	0	0.2359	2.1398	2.6811	0	0.5097	0	1.6856	0.1699	-3.3105	0.0178853
miR-1307-y	23	ACTCGGCGTGGCGTCGGTCGTGG	31	0	7	24	0	0	0	0	0.8321	2.6811	0	0	0	1.17107	0.01	-6.87168	0.00299375
miR-130-x	22	ACTCTTTCCCTGTTGCACTACT	16	0	3	10	0	3	0	0	0.3566	1.1171	0	0.3823	0	0.491233	0.127433	-1.94667	0.367911
miR-130-y	22	CAGTGCAATGTTAAAAGGGCAT	4	0	2	2	0	0	0	0	0.2378	0.2234	0	0	0	0.153733	0.01	-3.94236	0.430187
miR-1322-y	18	TGAGGATGCAGCTGATGC	12	0	4	0	3	2	3	0	0.4755	0	0.2911	0.2548	0.3482	0.1585	0.298033	0.910991	0.654344
miR-132-y	22	TAACAGTCTACAGCCATGGTCG	5	0	2	3	0	0	0	0	0.2378	0.3351	0	0	0	0.190967	0.01	-4.25525	0.369257
miR-133-x	19	AGCTGGTTGAATCCGGGAA	38	11	4	11	2	4	6	1.2977	0.4755	1.2288	0.1941	0.5097	0.6963	1.00067	0.4667	-1.10039	0.315715
miR-133-y	24	TTGGTCCCCTTCAACCAGCTGTTT	3261	453	591	452	901	330	534	53.4397	70.2561	50.4943	87.423	42.0479	61.9731	58.0634	63.8147	0.13626	0.523658
miR-133-z	22	TTGGTCCCCTTCAACCAGCTGT	277910	45555	50921	45127	53542	36149	46616	5374.05	6053.32	5041.28	5195.12	4606.03	5410	5489.55	5070.38	-0.114592	0.892314
miR-1357-x	18	TATGAGAGCTGAGGGCAC	473	177	167	25	30	53	21	20.8804	19.8524	2.7928	2.9109	6.7531	2.4371	14.5085	4.0337	-1.84673	0.0204594
miR-136-y	21	ATCATCGTCTCAAATGAGTCT	9	0	0	9	0	0	0	0	0	1.0054	0	0	0	0.335133	0.01	-5.06666	0.318464
miR-137-x	20	ACGCGTATTCTTGGGGAATT	97	20	12	12	33	5	15	2.3594	1.4265	1.3406	3.202	0.6371	1.7408	1.70883	1.85997	0.122265	0.683094
miR-137-y	23	TTATTGCTTGAGAATACACGTAG	208278	32371	32943	37737	42298	29766	33163	3818.75	3916.15	4215.72	4104.13	3792.72	3848.72	3983.54	3915.19	-0.0249696	0.712385
miR-1386-x	18	CTCCTGGCTGGCTCGCCA	18	0	4	11	0	3	0	0	0.4755	1.2288	0	0.3823	0	0.5681	0.127433	-2.1564	0.285835
miR-1388-x	18	CAGCACTGGCAAACCTGA	3	3	0	0	0	0	0	0.3539	0	0	0	0	0	0.117967	0.01	-3.56031	0.705541
miR-139-x	23	TCTACAGTGCACGTGTCTCCAGT	2	0	0	0	0	2	0	0	0	0	0	0.2548	0	0.01	0.0849333	3.08633	0.790184
miR-13-x	21	TCATCAATTTGGTTGTGAAAT	703	100	113	161	107	127	95	11.7968	13.4331	17.9858	10.3821	16.1821	11.0252	14.4052	12.5298	-0.20123	0.944984
miR-13-y	22	TATCACAGCCACTTTGATGAGC	515604	78181	89418	92609	98267	73454	83675	9222.88	10629.7	10345.6	9534.74	9359.35	9710.86	10066.1	9534.99	-0.0781989	0.815681
miR-140-x	22	CAGTGGTTTTACCCTATGGTAG	5	0	0	5	0	0	0	0	0	0.5586	0	0	0	0.1862	0.01	-4.21878	0.639799
miR-140-y	20	TACCACAGGGTAGAACCACG	506	12	95	351	0	43	5	1.4156	11.2933	39.2113	0	5.479	0.5803	17.3067	2.01977	-3.09907	0.0175065
miR-141-y	21	TAACACTGTCAGGTAAAGATG	203	27	36	42	32	37	29	3.1851	4.2796	4.6919	3.1049	4.7145	3.3656	4.0522	3.72833	-0.120175	0.959234
miR-1421-y	18	CTGTTTAATGTGTGGCCT	2	0	0	2	0	0	0	0	0	0.2234	0	0	0	0.0744667	0.01	-2.89659	0.856668
miR-142-x	20	CCCATAAAGTAGAAAGCACT	12236	529	2121	8435	100	895	156	62.4052	252.137	942.3	9.7029	114.039	18.1045	418.947	47.2821	-3.1474	0.0017022
miR-142-y	22	TGTAGTGTTTCCTACTTTATGG	288	12	73	185	4	14	0	1.4156	8.678	20.6669	0.3881	1.7839	0	10.2535	0.724	-3.82398	0.000736816
miR-143-x	21	GGTGCAGTGCTGCATCTCTGG	3	0	3	0	0	0	0	0	0.3566	0	0	0	0	0.118867	0.01	-3.57127	0.702319
miR-143-y	20	TGAGATGAAGCACTGTAGCT	522	84	151	141	44	60	42	9.9093	17.9504	15.7515	4.2693	7.6451	4.8743	14.5371	5.59623	-1.37721	0.0194128
miR-144-x	23	GGATATCATCATATACTGTAAGT	30	0	3	22	0	0	5	0	0.3566	2.4577	0	0	0.5803	0.9381	0.193433	-2.27791	0.221778
miR-144-y	19	TACAGTATAGATGATGTAC	983	63	119	686	16	60	39	7.432	14.1463	76.6352	1.5525	7.6451	4.5261	32.7378	4.57457	-2.83925	0.00146916
miR-145-x	23	GTCCAGTTTTCCCAGGAATCCCT	20	5	6	0	0	2	7	0.5898	0.7133	0	0	0.2548	0.8124	0.434367	0.355733	-0.288117	1
miR-145-y	21	ATTCCTGGAAATACTGTTCTA	4	0	2	2	0	0	0	0	0.2378	0.2234	0	0	0	0.153733	0.01	-3.94236	0.430613
miR-1469-x	18	GCGCGCGGCGCGGGCTCC	4	2	0	0	2	0	0	0.2359	0	0	0.1941	0	0	0.0786333	0.0647	-0.281375	1
miR-146-x	22	TGAGAACTGAATTCCATAGGCT	3499	183	731	2343	32	154	56	21.5882	86.8989	261.744	3.1049	19.6224	6.4991	123.41	9.74213	-3.66308	5.96e-05
miR-146-y	21	GCCCTGTGGACTCAGTTCTGG	4	0	0	4	0	0	0	0	0	0.4469	0	0	0	0.148967	0.01	-3.89692	0.655251
miR-148-x	22	AAAGTTCTGAGACACTCCGACT	16	2	3	7	2	2	0	0.2359	0.3566	0.782	0.1941	0.2548	0	0.458167	0.149633	-1.61444	0.347938
miR-148-y	22	TCAGTGCACTACAGAACTTTGT	1278	197	403	416	110	128	24	23.2398	47.9073	46.4726	10.6732	16.3095	2.7853	39.2066	9.92267	-1.9823	0.0039985
miR-14-y	20	TCAGTCTTTTTCTCTCTCCT	698080	135567	106157	121762	128315	96406	109873	15992.6	12619.6	13602.4	12450.3	12283.8	12751.3	14071.5	12495.1	-0.171415	0.990992
miR-150-x	22	TCTCCCAACCCTTGTACCAGTG	2839	106	668	1820	24	182	39	12.5046	79.4096	203.318	2.3287	23.1901	4.5261	98.4107	10.015	-3.29666	0.000895003
miR-150-y	21	CTGGTACAGGCCTGGGGGACA	20	0	5	15	0	0	0	0	0.5944	1.6757	0	0	0	0.7567	0.01	-6.24165	0.0168191
miR-151-x	21	TCGAGGAGCTCACAGTCTAGT	675	27	141	444	13	40	10	3.1851	16.7616	49.6006	1.2614	5.0967	1.1605	23.1824	2.5062	-3.20946	0.000600348
miR-151-y	22	CTAGACTGAAGCTCCTTGAGGA	82	0	10	68	0	4	0	0	1.1888	7.5965	0	0.5097	0	2.92843	0.1699	-4.10737	0.0177211
miR-152-x	19	TTTTGTGATACACTCAGAA	2	2	0	0	0	0	0	0.2359	0	0	0	0	0	0.0786333	0.01	-2.97514	0.814375
miR-152-y	21	TCAGTGCATGACAGAACTTGG	57	2	9	34	3	7	2	0.2359	1.0699	3.7982	0.2911	0.8919	0.2321	1.70133	0.4717	-1.85072	0.1123
miR-153-x	18	CATTTTTGTGATGTAGAA	5	5	0	0	0	0	0	0.5898	0	0	0	0	0	0.1966	0.01	-4.29719	0.601656
miR-153-y	22	TTGCATAGTCACAAAAGTGATC	11	0	2	0	2	5	2	0	0.2378	0	0.1941	0.6371	0.2321	0.0792667	0.354433	2.16073	0.248092
miR-155-x	23	TTAATGCTAATCGTGATAGGGGT	112	10	31	69	0	2	0	1.1797	3.6852	7.7082	0	0.2548	0	4.19103	0.0849333	-5.62483	2.01e-06
miR-1584-x	20	GGGTTGGGTTGGGCTGGGCT	2	0	2	0	0	0	0	0	0.2378	0	0	0	0	0.0792667	0.01	-2.98671	0.807224
miR-1587-x	20	TTGGGTTGGGTTGGGTTGGG	170	42	11	48	23	31	15	4.9547	1.3076	5.3622	2.2317	3.95	1.7408	3.87483	2.64083	-0.553141	0.590929
miR-15-x	22	TAGCAGCACATCATGGTTTACA	255	19	54	160	3	17	2	2.2414	6.4193	17.8741	0.2911	2.1661	0.2321	8.84493	0.896433	-3.30258	0.000857024
miR-15-y	21	CGAATCATTATTTGCTGCTCT	7	0	0	7	0	0	0	0	0	0.782	0	0	0	0.260667	0.01	-4.70413	0.46385
miR-1677-x	19	GCTCTGATCCAAACCAACT	66	13	9	12	11	10	11	1.5336	1.0699	1.3406	1.0673	1.2742	1.2766	1.3147	1.20603	-0.124464	1
miR-1692-x	21	CTGTAGCTCAGTTGGTAGAGC	11	0	0	0	0	11	0	0	0	0	0	1.4016	0	0.01	0.4672	5.54597	0.152291
miR-16-x	22	TAGCAGCACGTAAATATTGGCG	764	40	144	508	14	49	9	4.7187	17.1182	56.7502	1.3584	6.2435	1.0445	26.1957	2.88213	-3.18412	0.000647014
miR-16-y	20	ACCAATATTACTGTGCTGCT	29	0	8	21	0	0	0	0	0.951	2.346	0	0	0	1.099	0.01	-6.78005	0.00397889
miR-1701-x	18	GTGGTTGGTTGGTTGGTT	52	15	6	8	8	9	6	1.7695	0.7133	0.8937	0.7762	1.1468	0.6963	1.1255	0.8731	-0.366347	0.825881
miR-1736-y	18	CACATCCGGAACTGTCCT	5	0	2	3	0	0	0	0	0.2378	0.3351	0	0	0	0.190967	0.01	-4.25525	0.368653
miR-17-x	23	CAAAGTGCTTACAGTGCAGGTAG	37	0	3	30	2	2	0	0	0.3566	3.3514	0.1941	0.2548	0	1.236	0.149633	-3.04618	0.0649105
miR-17-y	21	ACTGCAGTGAAGGCACTTGTA	10	0	4	6	0	0	0	0	0.4755	0.6703	0	0	0	0.381933	0.01	-5.25525	0.124476
miR-181-x	23	AACATTCAACGCTGTCGGTGAGT	3655	121	601	2652	25	209	47	14.2742	71.4449	296.263	2.4257	26.6303	5.4546	127.327	11.5035	-3.46839	0.000954441
miR-181-y	22	ACCATCGACCGTTGATTGTACC	123	2	19	98	0	2	2	0.2359	2.2587	10.9479	0	0.2548	0.2321	4.48083	0.1623	-4.78703	0.000566599
miR-182-x	22	TTTGGCAATGGTAGAACTCACA	52	7	4	30	9	0	2	0.8258	0.4755	3.3514	0.8733	0	0.2321	1.5509	0.368467	-2.0735	0.121301
miR-1839-x	22	AAGGTAGATAGAACAGGTCTTG	2	0	0	2	0	0	0	0	0	0.2234	0	0	0	0.0744667	0.01	-2.89659	0.85692
miR-183-x	21	AATGGCACTGTAAGAATTCAC	2301	469	232	284	739	268	309	55.3271	27.5794	31.7265	71.7044	34.148	35.8609	38.211	47.2378	0.305953	0.358374
miR-1843-x	21	CATGGAGGTCTCTGTCTGACT	2	0	2	0	0	0	0	0	0.2378	0	0	0	0	0.0792667	0.01	-2.98671	0.807865
miR-184-x	23	CCTTATCATTTCAGCTGTCCAGA	7	0	0	0	7	0	0	0	0	0	0.6792	0	0	0.01	0.2264	4.5008	0.378855
miR-184-y	20	TGGACGGAGAACTGATAAGG	3072125	547242	476558	495686	675062	433094	444483	64557.2	56651.6	55374.6	65500.5	55183.9	51584.3	58861.2	57422.9	-0.0356894	0.728335
miR-185-x	22	TGGAGAGAAAGGCAGTTCCTGA	108	2	20	84	0	2	0	0.2359	2.3775	9.3839	0	0.2548	0	3.9991	0.0849333	-5.5572	0.000136945
miR-185-y	22	CAGGGGCTGGCTTTCCTCTGGT	2	0	0	2	0	0	0	0	0	0.2234	0	0	0	0.0744667	0.01	-2.89659	0.835686
miR-186-x	22	CAAAGAATTCTCCTTTTGGGCT	634	29	128	421	11	37	8	3.4211	15.2162	47.0312	1.0673	4.7145	0.9284	21.8895	2.23673	-3.29077	0.000481339
miR-1895-y	18	AGGAGGAGGAGGAGGAGA	9	3	0	2	0	4	0	0.3539	0	0.2234	0	0.5097	0	0.192433	0.1699	-0.179673	1
miR-18-x	20	TAAGGTGCATCTAGTGCAGA	2	0	0	2	0	0	0	0	0	0.2234	0	0	0	0.0744667	0.01	-2.89659	0.849412
miR-18-y	22	ACTGCCCTAAGTGCTCCTTCTT	2	0	0	2	0	0	0	0	0	0.2234	0	0	0	0.0744667	0.01	-2.89659	0.847476
miR-190-x	21	AGATATGTTTGATATTCTTGG	125994	23547	19887	25781	21840	16869	18070	2777.8	2364.1	2880.07	2119.11	2149.41	2097.11	2673.99	2121.88	-0.333654	0.674516
miR-190-y	22	ACCAGGAATCAAACATATCATT	22357	3580	3615	4013	4712	3009	3428	422.327	429.739	448.305	457.2	383.4	397.835	433.457	412.812	-0.0704037	0.807884
miR-191-x	22	CAACGGAATCCCAAAAGCAGCT	4529	263	940	2841	68	340	77	31.0257	111.744	317.377	6.598	43.3221	8.9362	153.382	19.6188	-2.96682	0.000952824
miR-1929-x	18	TCTATGACTGTATAGAGC	5	0	2	0	0	3	0	0	0.2378	0	0	0.3823	0	0.0792667	0.127433	0.684956	1
miR-192-x	21	CTGACCTATGAATTGACAGCC	2974	579	976	409	344	566	100	68.3037	116.024	45.6906	33.3779	72.1185	11.6055	76.6726	39.034	-0.973982	0.187283
miR-193-x	19	TGGGCCTTAGCGGTTCAGT	49	10	4	5	19	8	3	1.1797	0.4755	0.5586	1.8435	1.0193	0.3482	0.737933	1.07033	0.536498	0.436269
miR-193-y	22	TACTGGCCTGCTAAGTCCCAAG	94888	15303	17246	16663	18125	12018	15533	1805.27	2050.15	1861.47	1758.65	1531.31	1802.68	1905.63	1697.54	-0.166819	0.994919
miR-194-x	22	TGTAACAGCAACTCCATGTGGA	259	45	98	33	38	42	3	5.3086	11.6499	3.6865	3.6871	5.3516	0.3482	6.88167	3.12897	-1.13707	0.219587
miR-194-y	18	AGTGGAGGTGGTAGTACT	2	0	0	0	0	2	0	0	0	0	0	0.2548	0	0.01	0.0849333	3.08633	0.794525
miR-1958-y	18	AAAGTGGAAGCAGAAACT	4	0	0	0	0	4	0	0	0	0	0	0.5097	0	0.01	0.1699	4.08661	0.607595
miR-195-x	20	TAGCAGCACAGAAATATTGG	2	0	0	2	0	0	0	0	0	0.2234	0	0	0	0.0744667	0.01	-2.89659	0.859968
miR-1960-x	19	AGCCAGTGCTGTTACAACA	2	0	0	0	0	2	0	0	0	0	0	0.2548	0	0.01	0.0849333	3.08633	0.795192
miR-196-x	23	TAGGTAGTTTCATGTTGTTGGGT	2	0	2	0	0	0	0	0	0.2378	0	0	0	0	0.0792667	0.01	-2.98671	0.808405
miR-196-y	18	TCGGCAAGGAAAAACTGC	2	0	0	0	0	2	0	0	0	0	0	0.2548	0	0.01	0.0849333	3.08633	0.786321
miR-197-y	22	TTCACCACCTTCTCCACCCAGC	98	3	18	72	0	3	2	0.3539	2.1398	8.0433	0	0.3823	0.2321	3.51233	0.2048	-4.10014	0.00135471
miR-1985-x	22	TGCCATTTTTATCAGTCACTGT	69	0	18	6	10	17	18	0	2.1398	0.6703	0.9703	2.1661	2.089	0.9367	1.7418	0.89492	0.295511
miR-1989-x	21	TCAGCTGTCACGATGCCTTCT	13	0	5	0	0	6	2	0	0.5944	0	0	0.7645	0.2321	0.198133	0.3322	0.74558	0.763427
miR-1990-y	21	CGGGACTACGTCAACTACTTG	51	0	18	8	0	16	9	0	2.1398	0.8937	0	2.0387	1.0445	1.01117	1.02773	0.0234452	0.931995
miR-1991-x	23	CTTACCCTGTAAATCGGAGAAGT	2	0	0	0	0	2	0	0	0	0	0	0.2548	0	0.01	0.0849333	3.08633	0.794488
miR-1993-y	22	TATTATGCTGTTATTCACGAGA	4	0	2	0	0	2	0	0	0.2378	0	0	0.2548	0	0.0792667	0.0849333	0.0996166	1
miR-1994-y	20	TGAGACAGTGTGTCCTCCCT	4345	180	703	1715	250	929	568	21.2343	83.5703	191.588	24.2572	118.371	65.919	98.7975	69.5158	-0.507134	0.630048
miR-199-x	23	CCCAGTGTTCAGACTACCTGTTC	883	60	181	524	20	70	28	7.0781	21.5167	58.5376	1.9406	8.9193	3.2495	29.0441	4.70313	-2.62655	0.00141097
miR-199-y	21	ACAGTAGTCTGCACATTGGTT	71	2	16	46	3	4	0	0.2359	1.902	5.1388	0.2911	0.5097	0	2.42557	0.266933	-3.18377	0.00973891
miR-19-y	21	TGTGCAAATCCATGCAAAACT	197	11	55	110	4	15	2	1.2977	6.5382	12.2884	0.3881	1.9113	0.2321	6.7081	0.843833	-2.99087	0.00245387
miR-19-z	21	TGTGCAAATCTATGCAAAACT	43	0	16	24	0	3	0	0	1.902	2.6811	0	0.3823	0	1.5277	0.127433	-3.58355	0.0198096
miR-1-x	22	CCGTACTTCCTTACTTCTCATA	5728	1199	762	1394	599	881	893	141.444	90.584	155.728	58.1203	112.255	103.637	129.252	91.3374	-0.500909	0.466701
miR-1-y	22	TGGAATGTAAAGAAGTATGGAG	4600374	832645	790420	731588	943283	566979	735459	98225.7	93962.5	81727.9	91525.7	72243.3	85353.4	91305.4	83040.8	-0.13688	0.932015
miR-1-z	19	TGGAATGTAAAGAAGTATG	137095	25776	20566	21985	28189	19287	21292	3040.75	2444.82	2456.01	2735.15	2457.51	2471.03	2647.19	2554.56	-0.0513871	0.772054
miR-2001-x	22	TTTGTGACCGTTCTAATGGGCA	9986	1024	2090	2761	968	2273	870	120.8	248.452	308.44	93.924	289.621	100.968	225.897	161.504	-0.484096	0.540215
miR-200-x	22	CATCATACCGGGCAGCATTAGA	332	55	38	58	67	55	59	6.4883	4.5173	6.4794	6.5009	7.008	6.8472	5.82833	6.78537	0.219343	0.467227
miR-200-y	24	TAATACTGTCAGGTAAAGATGTTA	270	52	51	40	36	36	55	6.1344	6.0627	4.4685	3.493	4.587	6.383	5.5552	4.821	-0.204506	0.953437
miR-200-z	21	TAATACTGTCTGGTAAAGATG	104	12	18	19	16	19	20	1.4156	2.1398	2.1225	1.5525	2.4209	2.3211	1.89263	2.09817	0.148734	0.661587
miR-206-y	19	TGGAATGTAAGGAAGTATG	187	34	23	24	43	35	28	4.0109	2.7342	2.6811	4.1722	4.4596	3.2495	3.14207	3.96043	0.333945	0.402767
miR-20-x	23	TAAAGTGCTTATAGTGCAGGTAG	99	3	16	68	4	8	0	0.3539	1.902	7.5965	0.3881	1.0193	0	3.28413	0.469133	-2.80744	0.0236072
miR-20-y	18	TACCGCGCTGTAAACACT	7	0	0	2	3	0	2	0	0	0.2234	0.2911	0	0.2321	0.0744667	0.1744	1.22773	0.749478
miR-210-x	20	TTGTGCGTGTGACATTAGCT	1154	219	202	184	216	167	166	25.8351	24.0131	20.5552	20.9582	21.2788	19.2651	23.4678	20.5007	-0.195009	0.947276
miR-2127-y	18	AGGGGAGGGAGGGAGGGC	37	6	0	21	4	6	0	0.7078	0	2.346	0.3881	0.7645	0	1.01793	0.3842	-1.40571	0.350106
miR-215-x	22	ATGACCTATGAATTGACAGCCT	16	0	12	0	4	0	0	0	1.4265	0	0.3881	0	0	0.4755	0.129367	-1.87798	0.565347
miR-216-x	22	AAATATCAGCTGGTAATTCTGA	8380	1408	1335	1627	1084	1612	1314	166.099	158.7	181.757	105.179	205.398	152.496	168.852	154.358	-0.129486	0.949118
miR-216-y	22	CAAGTTACTAGCCGAGATTACA	5	0	2	0	0	3	0	0	0.2378	0	0	0.3823	0	0.0792667	0.127433	0.684956	1
miR-2188-x	21	AAGGTCCAACCTCACATGTCC	5	0	0	0	0	0	5	0	0	0	0	0	0.5803	0.01	0.193433	4.27376	0.555755
miR-219-x	21	TGATTGTCCAAACGCAATTCT	5391	1004	561	1209	1136	913	568	118.44	66.6898	135.061	110.225	116.332	65.919	106.73	97.4921	-0.130613	0.93738
miR-219-y	19	AGGGCTGTGTGTGGACATC	7	0	0	5	0	2	0	0	0	0.5586	0	0.2548	0	0.1862	0.0849333	-1.13245	0.904604
miR-21-x	22	TAGCTTATCAGACTGATGTTGA	4260	456	1046	2126	206	347	79	53.7936	124.345	237.502	19.988	44.214	9.1683	138.547	24.4568	-2.50207	0.000505183
miR-21-y	21	CAACACCAGTCGATGGGCTGT	189	5	34	130	2	16	2	0.5898	4.0418	14.5227	0.1941	2.0387	0.2321	6.38477	0.821633	-2.95807	0.0102884
miR-221-x	21	ACCTGGCATACAATGTAGATT	133	5	34	89	0	5	0	0.5898	4.0418	9.9425	0	0.6371	0	4.85803	0.212367	-4.51574	0.000506088
miR-221-y	23	AGCTACATTGTCTGCTGGGTTTC	49	2	13	34	0	0	0	0.2359	1.5454	3.7982	0	0	0	1.85983	0.01	-7.53903	7.22e-05
miR-221-z	22	AGCTACATTGTCTGCTGGGTTT	62	7	17	36	0	2	0	0.8258	2.0209	4.0217	0	0.2548	0	2.28947	0.0849333	-4.75254	0.00010905
miR-222-y	23	AGCTACATCTGGCTACTGGGTCT	201	15	59	122	2	3	0	1.7695	7.0137	13.629	0.1941	0.3823	0	7.47073	0.192133	-5.28107	3.82e-07
miR-223-x	23	CGTGTATTTGACAAGCTGAGTTG	3	0	0	3	0	0	0	0	0	0.3351	0	0	0	0.1117	0.01	-3.48156	0.70823
miR-223-y	22	TGTCAGTTTGTCAAATACCCCA	204	2	41	156	2	3	0	0.2359	4.8739	17.4272	0.1941	0.3823	0	7.51233	0.192133	-5.28908	7.52e-05
miR-2285-y	19	TACCCTGAAAGAACATTTT	2	0	0	0	0	2	0	0	0	0	0	0.2548	0	0.01	0.0849333	3.08633	0.788379
miR-228-x	24	AATGGCACTGCATGAATTCACGGC	3999	747	628	587	958	477	602	88.1223	74.6546	65.5756	92.9537	60.7783	69.8648	76.1175	74.5323	-0.030363	0.758694
miR-22-y	22	AAGCTGCCAGTTGAAGAACTGT	2409	257	596	1036	171	291	58	30.3179	70.8505	115.735	16.5919	37.0786	6.7312	72.301	20.1339	-1.84439	0.0103339
miR-232-y	24	TAAATGCATCTTCACTTCGGTGGA	2	0	2	0	0	0	0	0	0.2378	0	0	0	0	0.0792667	0.01	-2.98671	0.803855
miR-234-y	21	TTATTGCTTGAGAATGCACGT	6578	962	1006	1016	1654	952	988	113.486	119.59	113.501	160.486	121.302	114.662	115.525	132.15	0.193966	0.390512
miR-2355-x	22	ATCCCCAGATACAATGGACAAT	17	0	7	10	0	0	0	0	0.8321	1.1171	0	0	0	0.649733	0.01	-6.02178	0.0249722
miR-235-y	22	TATTGCACTCGCCCCGGCCTGA	403	73	77	60	56	81	56	8.6117	9.1535	6.7028	5.4336	10.3208	6.4991	8.156	7.41783	-0.136864	0.98915
miR-236-y	24	TAATACTGTCAGGTAAAGATGTTA	667	95	104	90	117	122	139	11.207	12.3632	10.0542	11.3524	15.545	16.1316	11.2081	14.343	0.355801	0.278984
miR-239-x	18	TTGTACTGCACAAAGACT	2	0	0	0	0	2	0	0	0	0	0	0.2548	0	0.01	0.0849333	3.08633	0.795171
miR-23-y	21	ATCACATTGCCAGGGATTTCC	411	29	89	242	14	30	7	3.4211	10.58	27.0346	1.3584	3.8225	0.8124	13.6786	1.99777	-2.77546	0.00126276
miR-240-x	20	GAGGATATGGAGACTAGAAT	2	0	0	2	0	0	0	0	0	0.2234	0	0	0	0.0744667	0.01	-2.89659	0.845562
miR-240-y	22	TACTGGCCTCTCAATTCTCATC	8	0	4	0	4	0	0	0	0.4755	0	0.3881	0	0	0.1585	0.129367	-0.293017	1
miR-242-x	22	GTGCGTAGGCGTTGTGCACAGT	2	0	0	2	0	0	0	0	0	0.2234	0	0	0	0.0744667	0.01	-2.89659	0.858774
miR-2478-y	18	ATCCCACTTCTGACACCA	26670	5541	3791	5496	3890	4424	3528	653.663	450.661	613.975	377.442	563.697	409.44	572.766	450.193	-0.347403	0.652954
miR-2483-x	18	TGTCAACCAGCCCGCTGT	2	0	0	0	2	0	0	0	0	0	0.1941	0	0	0.01	0.0647	2.69377	0.784783
miR-2484-y	21	ATGATGACTTTCATTGCCTTG	2	0	0	2	0	0	0	0	0	0.2234	0	0	0	0.0744667	0.01	-2.89659	0.858164
miR-2498-x	18	TAACAGGTCTGTTATGCC	30	0	0	17	3	4	6	0	0	1.8991	0.2911	0.5097	0.6963	0.633033	0.499033	-0.343145	1
miR-24-x	24	GTGCCTACTGAGCTGAAACACAGT	3	0	3	0	0	0	0	0	0.3566	0	0	0	0	0.118867	0.01	-3.57127	0.701763
miR-24-y	20	TGGCTCAGTTCAGCAGGAAC	702	34	159	438	19	43	9	4.0109	18.9014	48.9303	1.8435	5.479	1.0445	23.9475	2.789	-3.10206	0.000520929
miR-251-x	20	TAAGTAGTAGTGCCGCAGGA	2	0	0	2	0	0	0	0	0	0.2234	0	0	0	0.0744667	0.01	-2.89659	0.852307
miR-252-x	22	CTAAGTACTAGTGCCGCAGGAG	100973	17332	16164	15694	22571	13351	15861	2044.63	1921.52	1753.22	2190.04	1701.16	1840.74	1906.46	1910.65	0.0031653	0.668921
miR-252-y	22	TCCTGCTGCTCAAGTGCTTATC	2857	462	459	423	747	321	445	54.5014	54.5644	47.2546	72.4806	40.9011	51.6443	52.1068	55.0087	0.0781873	0.589299
miR-25-y	22	CATTGCACTTGTCTCGGTCTGA	204	10	33	129	6	22	4	1.1797	3.9229	14.411	0.5822	2.8032	0.4642	6.50453	1.2832	-2.3417	0.0201388
miR-263-x	22	AATGGCACTGGAAGAATTCACG	6095106	994268	1057190	986546	1287129	785853	984120	117292	125675	110210	124889	100132	114212	117726	113077	-0.0581208	0.764728
miR-263-y	22	GTGGATTCTTGAGTGCCAAAGA	2	0	0	2	0	0	0	0	0	0.2234	0	0	0	0.0744667	0.01	-2.89659	0.83898
miR-26-x	22	TTCAAGTAATCCAGGATAGGCT	12302	689	2724	7541	215	890	243	81.2802	323.82	842.428	20.8612	113.402	28.2013	415.843	54.1548	-2.94088	0.000479763
miR-26-y	21	CCTGTTCTCCATTACTTGGCT	8	0	4	4	0	0	0	0	0.4755	0.4469	0	0	0	0.307467	0.01	-4.94236	0.193283
miR-2720-y	18	ATGACATGAGAGTTTACT	24	6	2	2	3	7	4	0.7078	0.2378	0.2234	0.2911	0.8919	0.4642	0.389667	0.549067	0.494741	0.63932
miR-2733-y	20	TCATTGGGTGTGTGATTCCT	3	0	0	0	0	0	3	0	0	0	0	0	0.3482	0.01	0.116067	3.53688	0.674283
miR-2736-x	22	AAACGTCTGTGGTACCAGCAGA	25	3	7	3	6	4	2	0.3539	0.8321	0.3351	0.5822	0.5097	0.2321	0.507033	0.441333	-0.200212	1
miR-2738-y	18	AGAACGGCCAACTGAGGA	44	4	12	5	16	5	2	0.4719	1.4265	0.5586	1.5525	0.6371	0.2321	0.819	0.807233	-0.0208777	0.881638
miR-275-x	23	TGCTGCATCAGGTGCTAGTGACT	418626	48809	43831	81528	73691	82355	88412	5757.92	5210.48	9107.74	7150.16	10493.5	10260.6	6692.05	9301.42	0.475004	0.118926
miR-275-y	23	TCAGGTACCTGAAGTAGCGCGCG	1361125	180037	163457	220680	269399	251444	276108	21238.7	19431.2	24652.8	26139.5	32038.5	32043.6	21774.2	30073.8	0.465887	0.0975979
miR-2765-x	22	TGGTAACTCCACCACCGTTGGC	845751	114477	120876	161423	164619	154037	130319	13504.7	14369.3	18033.1	15972.8	19627.1	15124.1	15302.4	16908	0.143952	0.420061
miR-2765-y	19	CAACGGTAGAGGAGTTCCT	24	2	4	8	0	4	6	0.2359	0.4755	0.8937	0	0.5097	0.6963	0.535033	0.402	-0.412433	0.916248
miR-276-x	22	AGCGAGGTATAGAGTTCCTACG	3900	682	596	922	623	554	523	80.4544	70.8505	102.999	60.449	70.5895	60.6965	84.7681	63.9117	-0.407442	0.594292
miR-276-y	22	TAGGAACTTCATACCGTGCTCT	5281384	843158	846388	852300	1131363	761645	846530	99465.9	100616	95213	109775	97047.2	98243.7	98431.6	101689	0.0469644	0.557475
miR-2779-x	18	TCCGGCCCGGAGGACCAT	655	131	127	101	114	87	95	15.4539	15.0973	11.283	11.0613	11.0854	11.0252	13.9447	11.0573	-0.334721	0.720491
miR-2779-y	18	TCCGGCCCGGAGGACCAA	75	15	24	6	6	10	14	1.7695	2.853	0.6703	0.5822	1.2742	1.6248	1.76427	1.1604	-0.604446	0.590274
miR-2779-z	18	ATCCGGCCCGGAGGACCA	263	32	46	52	50	41	42	3.775	5.4683	5.8091	4.8514	5.2241	4.8743	5.01747	4.98327	-0.00986735	0.788436
miR-277-x	21	CGTGCCAGAGGCGCGTTTACA	2	0	0	0	2	0	0	0	0	0	0.1941	0	0	0.01	0.0647	2.69377	0.788994
miR-277-y	23	TAAATGCACTATCTGGTACGACA	581508	88249	120991	87645	106698	72120	105805	10410.6	14383	9791.09	10352.8	9189.38	12279.2	11528.2	10607.1	-0.12014	0.907842
miR-2788-x	21	TGGGGTTTCAAAGCGGCATTT	438	88	73	82	72	45	78	10.3812	8.678	9.1605	6.9861	5.7338	9.0523	9.40657	7.2574	-0.374215	0.69243
miR-2788-y	20	CAATGCCCTTGGAAATCCCA	27617	4980	4669	4891	5891	3027	4159	587.482	555.035	546.389	571.597	385.694	482.671	562.969	479.987	-0.230058	0.889524
miR-278-y	21	TCGGTGGGACTTTCGTCCGTT	32987	5639	5569	5552	5768	5003	5456	665.223	662.024	620.231	559.663	637.472	633.194	649.159	610.109	-0.0895052	0.850263
miR-2796-x	22	AGGGGTTTCTTTCGGCCTCCAG	90	12	11	11	33	13	10	1.4156	1.3076	1.2288	3.202	1.6564	1.1605	1.31733	2.0063	0.606917	0.300328
miR-2796-y	23	GTAGGCCGGCGGAAACTACTTGC	1597655	275099	292796	296284	241733	238232	253511	32453	34806.6	33098.8	23455.1	30355	29421.1	33452.8	27743.7	-0.269965	0.778876
miR-279-y	20	TGACTAGATCCACACTCATC	1768185	292188	266540	293185	353580	275650	287042	34468.9	31685.4	32752.6	34307.5	35122.7	33312.5	32969	34247.6	0.0548933	0.558261
miR-27-x	22	AGGGCTTAGCTGCTTGTGAGCA	6	2	0	2	0	0	2	0.2359	0	0.2234	0	0	0.2321	0.1531	0.0773667	-0.98469	0.870516
miR-27-y	21	TTCACAGTGGCTAAGTTCCGC	2705	166	554	1672	77	186	50	19.5827	65.8577	186.784	7.4712	23.6997	5.8027	90.7415	12.3245	-2.88023	0.000493102
miR-281-x	22	AAGAGAGCTATCCGTCGACAGT	448618	77415	73707	80437	73280	80950	62829	9132.52	8762.04	8985.86	7110.28	10314.5	7291.59	8960.14	8238.78	-0.12109	0.922022
miR-281-y	20	TGTCATGGAGTTGCTCTCTT	42534	6042	6764	6936	7552	9150	6090	712.765	804.082	774.842	732.762	1165.87	706.772	763.896	868.469	0.185099	0.401652
miR-282-x	22	TAGCCTCTCCTAGGCTTTGTCT	10253	1930	1376	2470	1622	1493	1362	227.679	163.574	275.931	157.381	190.235	158.066	222.395	168.561	-0.399855	0.587552
miR-282-y	20	ACATAGCCTAAAAGAGGTTA	582	106	80	130	118	92	56	12.5046	9.5101	14.5227	11.4494	11.7224	6.4991	12.1791	9.8903	-0.300325	0.793256
miR-283-x	20	AAATATCAGCTGGTAATTCT	401935	67244	65803	75126	58466	75293	60003	7932.66	7822.44	8392.56	5672.89	9593.67	6963.62	8049.22	7410.06	-0.119363	0.922652
miR-285-y	22	TAGCACCATTTGAAATCAGTTC	9	5	2	2	0	0	0	0.5898	0.2378	0.2234	0	0	0	0.350333	0.01	-5.13066	0.0733185
miR-2888-y	18	AGGGTGGGGTGGGGGGAT	4	0	2	0	2	0	0	0	0.2378	0	0.1941	0	0	0.0792667	0.0647	-0.292949	1
miR-28-x	21	TCGAGGAGCTCACAGTCTAGT	564	28	122	360	13	34	7	3.3031	14.503	40.2167	1.2614	4.3322	0.8124	19.3409	2.13533	-3.17912	0.000481746
miR-28-y	22	CACTAGATTGTGAGCTCCTGGA	211	9	46	139	0	15	2	1.0617	5.4683	15.5281	0	1.9113	0.2321	7.3527	0.714467	-3.36334	0.00441642
miR-2943-x	18	TAAGCAGGCACTCGCAGG	16	4	2	0	0	6	4	0.4719	0.2378	0	0	0.7645	0.4642	0.236567	0.409567	0.791851	0.650471
miR-2968-y	18	GCTCTGCCTGGAGACCTT	2	0	0	0	0	2	0	0	0	0	0	0.2548	0	0.01	0.0849333	3.08633	0.788622
miR-297-x	21	TGAATTTGTGCATGTGCATAT	2	0	0	0	2	0	0	0	0	0	0.1941	0	0	0.01	0.0647	2.69377	0.787601
miR-29-x	22	ACCGATTTCTCCTGGTGTTCAG	2	0	0	2	0	0	0	0	0	0.2234	0	0	0	0.0744667	0.01	-2.89659	0.857243
miR-29-y	20	TAGCACCATTTGAAATCAGT	11397	1549	1936	2547	2520	1413	1432	182.733	230.145	284.533	244.513	180.042	166.19	232.47	196.915	-0.239476	0.883927
miR-2-x	18	CTCACGAAGTTGCTGTAA	11	0	2	3	2	2	2	0	0.2378	0.3351	0.1941	0.2548	0.2321	0.190967	0.227	0.249371	1
miR-2-y	23	TATCACAGCCAGCTTTGATGAGC	947544	146423	169622	158415	193111	130298	149675	17273.3	20164.1	17697	18737.3	16602.3	17370.5	18378.1	17570	-0.0648731	0.784319
miR-3020-x	18	ATAAGGATCCCTTAGAAG	2	0	0	0	2	0	0	0	0	0	0.1941	0	0	0.01	0.0647	2.69377	0.785732
miR-302-x	19	ACTTTAACATTGAAGAACT	2	0	0	0	2	0	0	0	0	0	0.1941	0	0	0.01	0.0647	2.69377	0.79172
miR-3049-x	24	TCGGGAAGGCAGTTGCGGCGGACT	37969	6500	6060	7103	6868	5546	5892	766.794	720.393	793.498	666.394	706.66	683.793	760.228	685.616	-0.149032	0.964
miR-3049-y	22	TCCGTCCAACTCCTTTCCGTCT	17608	3417	2935	3568	2452	2545	2691	403.098	348.903	398.592	237.915	324.279	312.303	383.531	291.499	-0.395854	0.573047
miR-304-x	22	TAATCTCATGTTGTAACTGTGA	128	30	9	19	35	13	22	3.5391	1.0699	2.1225	3.396	1.6564	2.5532	2.24383	2.5352	0.176134	0.6376
miR-305-x	24	ATTGTACTTCATCAGGTGCTCTGG	1035158	109532	87337	186957	182046	237362	231924	12921.3	10382.3	20885.5	17663.7	30244.2	26915.8	14729.7	24941.2	0.759803	0.0280737
miR-305-y	23	CGGCACCTGTTGGAGTGCAATCC	5026	409	471	563	1018	1502	1063	48.249	55.9909	62.8945	98.7754	191.382	123.366	55.7115	137.841	1.30696	0.00160082
miR-306-x	21	TCAGGTACTGAGTGACTCTGA	724260	134375	94638	169383	95977	126972	102915	15852	11250.3	18922.3	9312.54	16178.5	11943.8	15341.5	12478.3	-0.298023	0.744622
miR-3077-x	19	GCGGACGGGCGGGCGGGCG	4	0	0	0	2	0	2	0	0	0	0.1941	0	0.2321	0.01	0.142067	3.8285	0.409541
miR-307-x	22	ACTCACTCAACTTGGGTGTGAT	4	0	2	0	0	2	0	0	0.2378	0	0	0.2548	0	0.0792667	0.0849333	0.0996166	1
miR-307-y	21	TCACAACCTCCTTGAGTGAGC	31598	4828	4509	5844	5838	5654	4925	569.551	536.015	652.851	566.455	720.421	571.569	586.139	619.481	0.079818	0.539795
miR-3086-y	18	CCAACGAGCCTACAGTCA	2	0	2	0	0	0	0	0	0.2378	0	0	0	0	0.0792667	0.01	-2.98671	0.808938
miR-30-x	24	TGTAAACATCCTTGACTGGAAGCT	4642	341	1222	2482	166	351	80	40.2272	145.267	277.272	16.1068	44.7237	9.2844	154.255	23.3716	-2.72249	0.000447945
miR-30-y	22	CTTTCAGTCGGATGTTTACAGC	49	2	10	32	0	5	0	0.2359	1.1888	3.5748	0	0.6371	0	1.6665	0.212367	-2.97219	0.0406333
miR-310-y	20	TATTGCACTTCTCCCGGCCT	9	0	0	0	2	3	4	0	0	0	0.1941	0.3823	0.4642	0.01	0.346867	5.11631	0.0469393
miR-311-y	22	AATTGCACTTGTACCGGCCTGA	30	9	0	2	13	3	3	1.0617	0	0.2234	1.2614	0.3823	0.3482	0.428367	0.663967	0.632265	0.554095
miR-3130-y	21	GCTGCACCGGAGACTGGGTAA	2	0	0	2	0	0	0	0	0	0.2234	0	0	0	0.0744667	0.01	-2.89659	0.857354
miR-3148-x	18	TGGAATAAACTGTTGTGT	4	2	0	2	0	0	0	0.2359	0	0.2234	0	0	0	0.1531	0.01	-3.9364	0.433857
miR-315-x	23	TTTTGATTGTTGCTCAGAAAGCC	442925	75040	79577	88323	69554	58192	72239	8852.34	9459.85	9866.83	6748.75	7414.7	8383.66	9393.01	7515.7	-0.321679	0.689715
miR-315-y	21	CTTTCGAGCAATAATCATAAT	3265	545	508	565	656	537	454	64.2927	60.3894	63.1179	63.651	68.4234	52.6888	62.6	61.5877	-0.0235196	0.75061
miR-316-x	20	TGTCTTTTTCCGCTTTGCTG	24697	4224	3640	4114	5180	3750	3789	498.298	432.711	459.587	502.61	477.817	439.731	463.532	473.386	0.0303468	0.629449
miR-316-y	22	CCAGCAAAGTGGAAGAGGCCGA	27	8	4	4	6	0	5	0.9437	0.4755	0.4469	0.5822	0	0.5803	0.622033	0.3875	-0.682796	0.753677
miR-317-x	22	GGGGAGCCACTCTGAGTTCACT	42096	6833	9653	8480	5001	4844	7285	806.078	1147.52	947.327	485.242	617.212	845.457	966.974	649.304	-0.574583	0.334564
miR-317-y	21	TGAACACAGCTGGTGGTATCT	1169744	193864	200926	219207	203405	169516	182826	22869.8	23885.4	24488.3	19736.2	21599.4	21217.8	23747.8	20851.1	-0.187672	0.954546
miR-31-x	23	AGGCAAGATGTCGGCATAGCTGA	151407	21157	24025	25601	20492	38685	21447	2495.86	2856.01	2859.97	1988.32	4929.16	2489.02	2737.28	3135.5	0.195953	0.435524
miR-31-y	23	CGGCTGTGTCACATCGAGCCACC	29	2	3	7	4	10	3	0.2359	0.3566	0.782	0.3881	1.2742	0.3482	0.458167	0.670167	0.548647	0.523036
miR-320-y	22	AAAAGCTGGGTTGAGAGGGCGA	94	4	15	59	2	12	2	0.4719	1.7832	6.5911	0.1941	1.529	0.2321	2.94873	0.651733	-2.17774	0.0596756
miR-322-y	21	AAAACATGAAGCGCTGCAACA	4	0	4	0	0	0	0	0	0.4755	0	0	0	0	0.1585	0.01	-3.98641	0.642022
miR-3266-x	19	GTTCCATTGGAAAGTGAGA	7	0	5	0	2	0	0	0	0.5944	0	0.1941	0	0	0.198133	0.0647	-1.61463	0.821371
miR-326-y	21	CCTCTGGGCCCTTCCTCCAGT	6	0	0	6	0	0	0	0	0	0.6703	0	0	0	0.223433	0.01	-4.48177	0.597372
miR-327-x	18	TTGCGGGGTATGAGGGTA	4	0	0	0	0	4	0	0	0	0	0	0.5097	0	0.01	0.1699	4.08661	0.607962
miR-328-y	21	CTGGCCCTCTCTGCCCTTCCG	4	0	2	2	0	0	0	0	0.2378	0.2234	0	0	0	0.153733	0.01	-3.94236	0.431724
miR-3298-x	18	CTGCTGTGGATTTCGAAC	2	0	0	0	0	0	2	0	0	0	0	0	0.2321	0.01	0.0773667	2.95171	0.788554
miR-32-x	22	TATTGCACATTACTAAGTTGCA	19	0	2	15	0	2	0	0	0.2378	1.6757	0	0.2548	0	0.637833	0.0849333	-2.90878	0.17086
miR-330-x	22	TCTCTGGGCCTGTGTCTTAGGA	3	0	0	3	0	0	0	0	0	0.3351	0	0	0	0.1117	0.01	-3.48156	0.710172
miR-330-y	23	GCAAAGCACACGGCCTGCAGAGA	8	0	4	4	0	0	0	0	0.4755	0.4469	0	0	0	0.307467	0.01	-4.94236	0.193256
miR-331-x	21	TTCTAGGTATGGTCCCAGGGA	2	0	0	2	0	0	0	0	0	0.2234	0	0	0	0.0744667	0.01	-2.89659	0.83277
miR-331-y	21	GCCCCTGGGCCTATCCTAGAA	37	0	13	24	0	0	0	0	1.5454	2.6811	0	0	0	1.40883	0.01	-7.13836	0.00102904
miR-335-x	21	TCAAGAGCAATAACGAAAAAT	39	2	9	25	0	3	0	0.2359	1.0699	2.7928	0	0.3823	0	1.3662	0.127433	-3.42235	0.0129924
miR-335-y	22	TTTTTCATTATTGCTCCTGACC	9	0	0	9	0	0	0	0	0	1.0054	0	0	0	0.335133	0.01	-5.06666	0.318715
miR-338-x	21	AACAATATCCTGGTGCTGAGT	6	0	0	6	0	0	0	0	0	0.6703	0	0	0	0.223433	0.01	-4.48177	0.595907
miR-338-y	21	TCCAGCATCAGTGATTTTGTT	26	0	5	15	0	4	2	0	0.5944	1.6757	0	0.5097	0.2321	0.7567	0.247267	-1.61365	0.350106
miR-339-x	23	TCCCTGTCCTCCAGGAGCTCACG	44	0	12	30	0	2	0	0	1.4265	3.3514	0	0.2548	0	1.59263	0.0849333	-4.22894	0.00899692
miR-339-y	19	TGAGCGCCTCGACGACAGA	22	2	4	16	0	0	0	0.2359	0.4755	1.7874	0	0	0	0.832933	0.01	-6.38013	0.00452134
miR-33-x	21	GTGCATTGTAGTTGCATTGCA	2004	370	182	508	392	316	236	43.6483	21.6356	56.7502	38.0353	40.2641	27.3889	40.678	35.2294	-0.207469	0.945695
miR-33-y	20	CAATACTTCTGCAGTGCAAT	7	0	5	0	2	0	0	0	0.5944	0	0.1941	0	0	0.198133	0.0647	-1.61463	0.821438
miR-340-x	22	TTATAAAGCAATGAGACTGATT	124	8	26	78	3	9	0	0.9437	3.0908	8.7136	0.2911	1.1468	0	4.24937	0.4793	-3.14825	0.00472227
miR-340-y	22	TCCGTCTCAGTTACTTTATAGC	6	0	2	4	0	0	0	0	0.2378	0.4469	0	0	0	0.228233	0.01	-4.51244	0.313524
miR-3416-y	18	TCTCGCAGGACATGCTGG	28	2	4	3	7	8	4	0.2359	0.4755	0.3351	0.6792	1.0193	0.4642	0.348833	0.7209	1.04726	0.238517
miR-3419-y	18	TATACTACTGTAAAACTA	2	0	0	0	0	0	2	0	0	0	0	0	0.2321	0.01	0.0773667	2.95171	0.786714
miR-341-y	19	TCGGTCGGTCGGTCGGTCG	19	6	5	0	0	6	2	0.7078	0.5944	0	0	0.7645	0.2321	0.434067	0.3322	-0.385865	0.92282
miR-342-x	21	AGGGGTGCTATCTGTGATTGA	20	0	2	18	0	0	0	0	0.2378	2.0108	0	0	0	0.749533	0.01	-6.22792	0.027387
miR-342-y	23	TCTCACACAGAAATCGCACCCGT	1319	62	240	881	10	118	8	7.314	28.5304	98.4192	0.9703	15.0353	0.9284	44.7545	5.64467	-2.98707	0.00671232
miR-345-x	23	GCTGACTCCTAGTCCAGGGCTCT	16	0	6	10	0	0	0	0	0.7133	1.1171	0	0	0	0.610133	0.01	-5.93105	0.0318856
miR-3477-x	22	TAATCTCATGTGGTAACTGTGA	122397	19046	21753	20955	16962	24758	18923	2246.82	2585.92	2340.95	1645.8	3154.61	2196.1	2391.23	2332.17	-0.0360799	0.774679
miR-34-x	23	TGGCAGTGTGGTTAGCTGGTTGT	241400	42447	41618	36439	65115	23560	32221	5007.4	4947.41	4070.71	6318.04	3001.97	3739.39	4675.17	4353.13	-0.102966	0.868589
miR-34-y	18	CTGCCACTATCTGCACTG	10	0	3	2	5	0	0	0	0.3566	0.2234	0.4851	0	0	0.193333	0.1617	-0.257771	1
miR-35-y	21	TCACCGGGTAAACATTCATCG	6	4	0	0	0	2	0	0.4719	0	0	0	0.2548	0	0.1573	0.0849333	-0.889116	0.911368
miR-360-x	20	TTGTGACCGTTCTAACGGGC	4	0	0	0	2	2	0	0	0	0	0.1941	0.2548	0	0.01	0.149633	3.90336	0.412923
miR-3613-x	22	TGTTGTACTTTTTTTTTTGTTC	2	0	0	2	0	0	0	0	0	0.2234	0	0	0	0.0744667	0.01	-2.89659	0.836097
miR-3615-y	20	TCTCTCGGCTCCTCGCGGCT	4	0	0	4	0	0	0	0	0	0.4469	0	0	0	0.148967	0.01	-3.89692	0.656127
miR-361-x	22	TTATCAGAATCTCCAGGGGTAC	188	9	47	117	4	9	2	1.0617	5.5872	13.0704	0.3881	1.1468	0.2321	6.5731	0.589	-3.48023	0.000430918
miR-361-y	22	TCCCCCAGGTGTGATTCTGATT	51	0	13	35	0	3	0	0	1.5454	3.91	0	0.3823	0	1.81847	0.127433	-3.83491	0.0164689
miR-3620-x	22	CTGGGCTGGGCTGGGCTGGGCT	4	0	0	2	2	0	0	0	0	0.2234	0.1941	0	0	0.0744667	0.0647	-0.202829	1
miR-362-x	23	AATCCTTGGAACCTAGGTGTGAG	15	0	4	11	0	0	0	0	0.4755	1.2288	0	0	0	0.5681	0.01	-5.82807	0.0434515
miR-363-y	23	AATTGCACGGTATCCATCTGTAA	388	16	63	289	0	14	6	1.8875	7.4892	32.2851	0	1.7839	0.6963	13.8873	0.826733	-4.0702	0.000374757
miR-365-y	22	TAATGCCCCTAAAAATCCTTAT	19	2	5	7	3	0	2	0.2359	0.5944	0.782	0.2911	0	0.2321	0.537433	0.1744	-1.62369	0.334675
miR-36-y	22	TCACCGGGTGAACATCCATCAT	1186	228	232	157	187	205	177	26.8968	27.5794	17.539	18.1444	26.1207	20.5417	24.0051	21.6023	-0.152156	1
miR-370-y	22	GCCTGCTGGGGTGGAACCTGGT	5	0	0	5	0	0	0	0	0	0.5586	0	0	0	0.1862	0.01	-4.21878	0.641428
miR-374-x	21	TTATAATACAACCTGATAAGT	451	12	83	312	4	32	8	1.4156	9.8668	34.8545	0.3881	4.0774	0.9284	15.379	1.79797	-3.09652	0.00394493
miR-374-y	22	CTTATCAGATTGTATTGTAATT	18	0	9	9	0	0	0	0	1.0699	1.0054	0	0	0	0.691767	0.01	-6.11221	0.0202653
miR-3759-y	18	CACGTTGACTGGGCGTCC	69	6	2	7	0	48	6	0.7078	0.2378	0.782	0	6.1161	0.6963	0.575867	2.2708	1.97939	0.0955538
miR-375-y	22	TTTGTTCGTTCGGCTCGAGTTA	5872	643	1448	1346	802	1095	538	75.8536	172.133	150.366	77.8172	139.523	62.4373	132.784	93.259	-0.509769	0.47272
miR-3770-x	23	AATCCTGCATCAAGTGCGTTGCT	2031	359	362	297	368	349	296	42.3506	43.0334	33.1788	35.7066	44.4688	34.3521	39.5209	38.1758	-0.0499574	0.80834
miR-378-x	23	ACTGGACTTGGAGTCAGAAGGCT	19	3	5	7	2	2	0	0.3539	0.5944	0.782	0.1941	0.2548	0	0.576767	0.149633	-1.94656	0.187729
miR-378-y	22	ACTGGACTTGGAGTCAGAAGGC	190	20	64	74	12	18	2	2.3594	7.6081	8.2668	1.1643	2.2935	0.2321	6.0781	1.22997	-2.305	0.00734593
miR-37-y	22	TCACCGGGTGAACAGAAGCTGT	8	2	4	0	0	2	0	0.2359	0.4755	0	0	0.2548	0	0.237133	0.0849333	-1.4813	0.655807
miR-381-y	22	TATACAAGGGCAAGCTCTCTGT	5	0	0	5	0	0	0	0	0	0.5586	0	0	0	0.1862	0.01	-4.21878	0.640616
miR-382-x	22	GAAGTTGTTCGTGGTGGATTCG	2	0	2	0	0	0	0	0	0.2378	0	0	0	0	0.0792667	0.01	-2.98671	0.803434
miR-3836-y	18	ATCGCTGGTGAAAGTAGA	4	0	0	0	4	0	0	0	0	0	0.3881	0	0	0.01	0.129367	3.69339	0.587695
miR-3878-x	19	TGGACGGAGAACTGATTTT	32	4	0	6	14	6	2	0.4719	0	0.6703	1.3584	0.7645	0.2321	0.380733	0.785	1.04391	0.270916
miR-3963-x	18	AATCCCACTTCTGACACT	13	0	4	5	0	2	2	0	0.4755	0.5586	0	0.2548	0.2321	0.3447	0.1623	-1.08668	0.661588
miR-3964-y	20	CATAAAGTAGAAAGCACTAA	68	5	12	40	0	9	2	0.5898	1.4265	4.4685	0	1.1468	0.2321	2.1616	0.459633	-2.23354	0.0566776
miR-3968-y	18	ATCCCACTCCTGACACCA	1384	202	208	595	98	142	139	23.8296	24.7263	66.4693	9.5088	18.0933	16.1316	38.3417	14.5779	-1.39513	0.0275972
miR-3969-x	23	CCCATAAAGTAGAAAGCACTATA	8	0	0	8	0	0	0	0	0	0.8937	0	0	0	0.2979	0.01	-4.89676	0.382302
miR-39-y	18	TCACCGGGTGGAAACCTG	2	0	0	0	0	2	0	0	0	0	0	0.2548	0	0.01	0.0849333	3.08633	0.792831
miR-4001-x	18	AACATACTGATGAACAGG	2	0	0	0	2	0	0	0	0	0	0.1941	0	0	0.01	0.0647	2.69377	0.786663
miR-409-x	23	AGGTTACCCGAGCAACTTTGCAT	6	0	2	4	0	0	0	0	0.2378	0.4469	0	0	0	0.228233	0.01	-4.51244	0.313924
miR-409-y	23	CGAATGTTGCTCGGTGAACCCCT	10	0	3	7	0	0	0	0	0.3566	0.782	0	0	0	0.379533	0.01	-5.24615	0.13157
miR-4100-y	18	AATTATTAGAAGAAAACT	2	0	0	0	0	2	0	0	0	0	0	0.2548	0	0.01	0.0849333	3.08633	0.789555
miR-410-y	21	AATATAACACAGATGGCCTGT	2	0	2	0	0	0	0	0	0.2378	0	0	0	0	0.0792667	0.01	-2.98671	0.804404
miR-411-x	22	ATAGTAGACCGTATAGCGTACG	7	0	0	7	0	0	0	0	0	0.782	0	0	0	0.260667	0.01	-4.70413	0.462438
miR-4171-x	19	TGACTCTCTTAATGAAACC	3	3	0	0	0	0	0	0.3539	0	0	0	0	0	0.117967	0.01	-3.56031	0.701577
miR-421-y	23	ATCAACAGACATTAATTGGGCGT	2	0	0	0	0	2	0	0	0	0	0	0.2548	0	0.01	0.0849333	3.08633	0.792014
miR-423-x	23	TGAGGGGCAGAGAGCGAGACTTT	199	0	34	131	0	34	0	0	4.0418	14.6344	0	4.3322	0	6.2254	1.44407	-2.10803	0.236202
miR-423-y	23	AGCTCGGTCTGAGGCCCCTCAGT	302	21	53	200	4	24	0	2.4773	6.3005	22.3426	0.3881	3.058	0	10.3735	1.1487	-3.17482	0.0056441
miR-424-x	22	CAGCAGCAATTCATGTTTTGAA	6	0	4	2	0	0	0	0	0.4755	0.2234	0	0	0	0.232967	0.01	-4.54205	0.315418
miR-425-x	24	AATGACACGATCACTCCCGTTGAG	149	0	47	94	0	6	2	0	5.5872	10.501	0	0.7645	0.2321	5.36273	0.3322	-4.01284	0.00537156
miR-425-y	22	CATCGGGAATGTCGTGTCCGCC	11	0	0	11	0	0	0	0	0	1.2288	0	0	0	0.4096	0.01	-5.35614	0.205067
miR-4286-z	18	ACCCCACTCCTGGTACCA	9	0	0	9	0	0	0	0	0	1.0054	0	0	0	0.335133	0.01	-5.06666	0.317801
miR-429-x	22	TCTTACCAGACAGAGTTAGATC	2	0	0	0	2	0	0	0	0	0	0.1941	0	0	0.01	0.0647	2.69377	0.786137
miR-429-y	19	TAATACTGTCAGGTAAAAT	4	0	0	0	2	2	0	0	0	0	0.1941	0.2548	0	0.01	0.149633	3.90336	0.412478
miR-42-y	21	TCACCGGGTGAACATCCATCA	39	4	3	8	12	7	5	0.4719	0.3566	0.8937	1.1643	0.8919	0.5803	0.574067	0.878833	0.614371	0.346768
miR-4324-y	20	ACCCTGAGACCCTAACTTGA	159	36	24	35	29	15	20	4.2469	2.853	3.91	2.8138	1.9113	2.3211	3.66997	2.34873	-0.643884	0.44267
miR-4334-y	21	TCCCTGTCCTCCAGGAGCTCT	14	0	5	9	0	0	0	0	0.5944	1.0054	0	0	0	0.533267	0.01	-5.73679	0.0522327
miR-4433-x	22	TGTCCCACCCCCACTCCTGTTT	22	0	0	22	0	0	0	0	0	2.4577	0	0	0	0.819233	0.01	-6.3562	0.0484874
miR-4454-x	18	ATCCGAGTCACGGCACCA	48	3	9	26	0	7	3	0.3539	1.0699	2.9045	0	0.8919	0.3482	1.44277	0.413367	-1.80334	0.14402
miR-44-y	21	TGACTAGAGACACATTCAGCT	350	75	58	68	42	63	44	8.8476	6.8948	7.5965	4.0752	8.0273	5.1064	7.77963	5.7363	-0.439582	0.596424
miR-4501-x	18	TATGTGACCTCTGATAAA	23	8	0	6	2	3	4	0.9437	0	0.6703	0.1941	0.3823	0.4642	0.538	0.346867	-0.633225	0.830775
miR-4502-y	18	TGATGATGATGATGATGA	2	0	0	0	2	0	0	0	0	0	0.1941	0	0	0.01	0.0647	2.69377	0.786602
miR-4507-y	20	TGGGTTGGGTTGGGTTGGGT	47	12	0	16	11	6	2	1.4156	0	1.7874	1.0673	0.7645	0.2321	1.06767	0.687967	-0.634051	0.714052
miR-4508-x	18	AAGCGGGGCTGGGCGCGC	2	0	0	2	0	0	0	0	0	0.2234	0	0	0	0.0744667	0.01	-2.89659	0.850858
miR-450-x	21	TTTTGCAATATGTTCCTGAAT	10	0	0	10	0	0	0	0	0	1.1171	0	0	0	0.372367	0.01	-5.21865	0.252069
miR-451-x	21	AAACCGTTACCATTACTGAGT	621	28	107	425	5	38	18	3.3031	12.7198	47.478	0.4851	4.8419	2.089	21.167	2.472	-3.09806	0.00147253
miR-455-x	22	TATGTGCCTTTGGACTACATCG	2	2	0	0	0	0	0	0.2359	0	0	0	0	0	0.0786333	0.01	-2.97514	0.813807
miR-45-y	21	TGACTAGAGACACATTCAGCT	350	75	58	68	42	63	44	8.8476	6.8948	7.5965	4.0752	8.0273	5.1064	7.77963	5.7363	-0.439582	0.59664
miR-462-x	23	TAACGGAACCCATAATGCAGCTG	2	0	0	2	0	0	0	0	0	0.2234	0	0	0	0.0744667	0.01	-2.89659	0.85564
miR-462-y	18	CACCTGGATGTGGATTCT	3	0	3	0	0	0	0	0	0.3566	0	0	0	0	0.118867	0.01	-3.57127	0.702696
miR-4662-x	23	TTAGCCAATTGTCCATCTTTAGA	2	0	2	0	0	0	0	0	0.2378	0	0	0	0	0.0792667	0.01	-2.98671	0.802625
miR-466-x	21	GTGTGTGTCTGTGTGTGTGTC	8	0	0	2	4	0	2	0	0	0.2234	0.3881	0	0.2321	0.0744667	0.206733	1.4731	0.65253
miR-466-y	22	CATACATACATACACACATACA	4	0	2	0	2	0	0	0	0.2378	0	0.1941	0	0	0.0792667	0.0647	-0.292949	1
miR-46-x	22	AAGAGAGCAGTCTGTTGACAGT	8	0	2	0	4	2	0	0	0.2378	0	0.3881	0.2548	0	0.0792667	0.2143	1.43485	0.650191
miR-46-y	20	TGTCATGGAGTTGCTCTCTT	18734	2736	2822	3044	3364	4219	2549	322.761	335.47	340.055	326.405	537.576	295.823	332.762	386.601	0.216356	0.386851
miR-4755-y	22	GCCAGGCTCTGAAGGGAAAGTT	2	0	0	2	0	0	0	0	0	0.2234	0	0	0	0.0744667	0.01	-2.89659	0.860167
miR-4757-y	18	AACAGGACGTCACAGAGG	9	0	9	0	0	0	0	0	1.0699	0	0	0	0	0.356633	0.01	-5.15637	0.274273
miR-4772-x	22	TGATCAGGCAAAATTGCAGACT	2	0	0	2	0	0	0	0	0	0.2234	0	0	0	0.0744667	0.01	-2.89659	0.837574
miR-4798-x	18	TCCGGTATCCTTTGTGAA	5	0	0	0	2	3	0	0	0	0	0.1941	0.3823	0	0.01	0.192133	4.26404	0.363356
miR-47-x	22	AAGAGAGCAGTCTGTTGACAGT	6	0	2	0	4	0	0	0	0.2378	0	0.3881	0	0	0.0792667	0.129367	0.70668	0.909395
miR-47-y	20	TGTCATGGAGTAGCTCTCTT	4	0	2	2	0	0	0	0	0.2378	0.2234	0	0	0	0.153733	0.01	-3.94236	0.430953
miR-4800-y	18	TCCGTCCGTCCGTCCGCC	3	3	0	0	0	0	0	0.3539	0	0	0	0	0	0.117967	0.01	-3.56031	0.704221
miR-4806-y	21	CATAGCTCAGCCGGTTAGAGC	2	0	0	0	0	2	0	0	0	0	0	0.2548	0	0.01	0.0849333	3.08633	0.787975
miR-4809-x	18	TAAGTTCAGAGTCGAATT	2	0	2	0	0	0	0	0	0.2378	0	0	0	0	0.0792667	0.01	-2.98671	0.806452
miR-484-x	22	TCAGGCTCAGTCCCCTCCCGAT	516	18	100	349	8	35	6	2.1234	11.8877	38.9879	0.7762	4.4596	0.6963	17.6663	1.97737	-3.15935	0.00182046
miR-484-z	24	TCAGGCTCAGTCCCCTCCCGATAA	28	0	7	21	0	0	0	0	0.8321	2.346	0	0	0	1.05937	0.01	-6.72706	0.00490542
miR-4851-y	18	AACTTTCTTTGGAGTTCT	2	0	0	0	0	2	0	0	0	0	0	0.2548	0	0.01	0.0849333	3.08633	0.794815
miR-486-x	22	TCCTGTACTGAGCTGCCCCGAG	807	44	125	553	5	54	26	5.1906	14.8596	61.7773	0.4851	6.8806	3.0174	27.2758	3.46103	-2.97835	0.00250502
miR-486-y	21	CGGGGCAGCTCAGTACAGGAT	17	0	5	10	0	2	0	0	0.5944	1.1171	0	0.2548	0	0.5705	0.0849333	-2.74782	0.181565
miR-493-x	22	TTGTACATGGTAGGCTTTCATT	2	0	0	2	0	0	0	0	0	0.2234	0	0	0	0.0744667	0.01	-2.89659	0.835237
miR-493-y	18	ACGGCTACTGTGTACCAG	4	4	0	0	0	0	0	0.4719	0	0	0	0	0	0.1573	0.01	-3.97545	0.649839
miR-494-y	23	TGAAACATACACGGGAAACCTCT	4	0	0	4	0	0	0	0	0	0.4469	0	0	0	0.148967	0.01	-3.89692	0.655759
miR-499-x	18	CTTGCAGTGATGTTGAAC	399	86	162	0	40	72	39	10.1453	19.258	0	3.8812	9.1741	4.5261	9.8011	5.86047	-0.741928	0.559577
miR-49-y	22	TAGCACCATGTGAAGCTGCTCT	5	0	0	0	0	5	0	0	0	0	0	0.6371	0	0.01	0.212367	4.40849	0.527826
miR-500-y	21	ATGCACCTGGGCAAGGATTCT	41	0	6	33	0	2	0	0	0.7133	3.6865	0	0.2548	0	1.4666	0.0849333	-4.11	0.0163493
miR-5011-x	19	ATATACTGCCATGCAATCT	4	0	4	0	0	0	0	0	0.4755	0	0	0	0	0.1585	0.01	-3.98641	0.643718
miR-501-x	22	AATCCTTTGTCCCTGGGTGAGA	2	0	0	2	0	0	0	0	0	0.2234	0	0	0	0.0744667	0.01	-2.89659	0.840391
miR-501-y	22	AATGCACCCGGGCAAGGATTCT	22	2	7	13	0	0	0	0.2359	0.8321	1.4523	0	0	0	0.8401	0.01	-6.39249	0.00258662
miR-502-y	21	ATGCACCTGGGCAAGGATTCT	41	0	6	33	0	2	0	0	0.7133	3.6865	0	0.2548	0	1.4666	0.0849333	-4.11	0.01627
miR-505-y	23	GTCAACACTTGCTGGTTTCCTCT	8	0	0	8	0	0	0	0	0	0.8937	0	0	0	0.2979	0.01	-4.89676	0.384578
miR-507-y	18	TTTTGAACCTTTTGGACT	28	5	2	6	5	7	3	0.5898	0.2378	0.6703	0.4851	0.8919	0.3482	0.4993	0.575067	0.203822	0.729208
miR-509-y	19	CGATTGCAGCATCTGAGGC	2	0	0	0	0	2	0	0	0	0	0	0.2548	0	0.01	0.0849333	3.08633	0.786934
miR-50-x	24	TGATATGTCTGGTATTCTTGGGTT	749	144	145	120	140	92	108	16.9874	17.2371	13.4056	13.584	11.7224	12.5339	15.8767	12.6134	-0.33195	0.727555
miR-50-y	23	CCAGAACTATTAGACATATCCAA	4	0	4	0	0	0	0	0	0.4755	0	0	0	0	0.1585	0.01	-3.98641	0.646157
miR-5100-y	18	GTTCGAATCCCGCCGGTG	17	0	2	3	0	10	2	0	0.2378	0.3351	0	1.2742	0.2321	0.190967	0.5021	1.39465	0.461126
miR-5106-y	21	CTGTAGCTCAGTTGGTAGAGC	10	2	0	0	0	8	0	0.2359	0	0	0	1.0193	0	0.0786333	0.339767	2.11133	0.529774
miR-5119-y	19	CTCATCACATCCTGGGGCT	2	2	0	0	0	0	0	0.2359	0	0	0	0	0	0.0786333	0.01	-2.97514	0.813838
miR-532-x	22	CATGCCTTGAGTGTAGGACCGT	15	0	9	6	0	0	0	0	1.0699	0.6703	0	0	0	0.580067	0.01	-5.85815	0.0406202
miR-532-y	21	CCTCCCACACCCAAGGCTTGC	3	0	0	3	0	0	0	0	0	0.3351	0	0	0	0.1117	0.01	-3.48156	0.709198
miR-5360-y	18	GAAATTCGAATGAACATT	14	3	0	2	3	0	6	0.3539	0	0.2234	0.2911	0	0.6963	0.192433	0.329133	0.774313	0.702537
miR-5365-y	18	TTGAGAAGGAACACCTGA	2	0	0	2	0	0	0	0	0	0.2234	0	0	0	0.0744667	0.01	-2.89659	0.860553
miR-5391-x	18	CTGGACAGAAATGATGAG	2	2	0	0	0	0	0	0.2359	0	0	0	0	0	0.0786333	0.01	-2.97514	0.817739
miR-541-x	19	GAAGGAATACTGATGTTGG	2	2	0	0	0	0	0	0.2359	0	0	0	0	0	0.0786333	0.01	-2.97514	0.813271
miR-542-y	22	TGTGACAGATTGATAACTGAAA	2	0	0	2	0	0	0	0	0	0.2234	0	0	0	0.0744667	0.01	-2.89659	0.857073
miR-548-x	18	AGGACTTGCGGTCTTTGT	2	0	0	0	0	2	0	0	0	0	0	0.2548	0	0.01	0.0849333	3.08633	0.788779
miR-548-y	18	CACTCTGCAGTTACTGTT	2	0	0	0	2	0	0	0	0	0	0.1941	0	0	0.01	0.0647	2.69377	0.786632
miR-54-x	18	CATTATTTACGGAATACA	2	0	2	0	0	0	0	0	0.2378	0	0	0	0	0.0792667	0.01	-2.98671	0.803032
miR-54-y	23	AACCCGTAATGATAATAATTCGA	22	5	2	4	5	6	0	0.5898	0.2378	0.4469	0.4851	0.7645	0	0.424833	0.416533	-0.028465	1
miR-5571-x	18	CAATTCTCAAAGAACCCT	127	27	13	17	22	29	19	3.1851	1.5454	1.8991	2.1346	3.6951	2.205	2.20987	2.67823	0.277322	0.522531
miR-55-y	22	AACCCGTAACGTTATAATTCGG	42	10	6	7	6	8	5	1.1797	0.7133	0.782	0.5822	1.0193	0.5803	0.891667	0.727267	-0.29402	0.927216
miR-5606-x	18	GTGAAGAGACATGAGAGG	2	2	0	0	0	0	0	0.2359	0	0	0	0	0	0.0786333	0.01	-2.97514	0.814466
miR-56-y	22	TACCCGTAATGCTTCTACCGAG	139	32	24	23	31	18	11	3.775	2.853	2.5694	3.0079	2.2935	1.2766	3.0658	2.19267	-0.483577	0.637226
miR-5735-x	21	ACCTTTCTCTTGTTGTCCACT	15	0	0	6	7	2	0	0	0	0.6703	0.6792	0.2548	0	0.223433	0.311333	0.478616	0.753374
miR-5735-y	21	TGGACAACAGGATAATGGCGT	656	70	32	306	96	93	59	8.2578	3.8041	34.1842	9.3148	11.8499	6.8472	15.4154	9.3373	-0.723292	0.443252
miR-574-x	21	AGTGTGTGTGTGTGAGTGACT	6	0	2	0	4	0	0	0	0.2378	0	0.3881	0	0	0.0792667	0.129367	0.70668	0.909263
miR-574-y	22	CACGCTCATGCACACACCCACA	15	0	3	8	0	2	2	0	0.3566	0.8937	0	0.2548	0.2321	0.416767	0.1623	-1.36058	0.514047
miR-576-x	22	ATTCTAATTTCTCCACGTCTTT	2	0	0	2	0	0	0	0	0	0.2234	0	0	0	0.0744667	0.01	-2.89659	0.860477
miR-577-x	22	GTAGATAAAATATTGGTACCTG	4	2	0	2	0	0	0	0.2359	0	0.2234	0	0	0	0.1531	0.01	-3.9364	0.433085
miR-578-z	18	AGATTCTTGTGCTCTAGC	2	0	0	0	0	0	2	0	0	0	0	0	0.2321	0.01	0.0773667	2.95171	0.789671
miR-57-x	25	TACCCTGTAGTTCCGAGCCGTGTAT	140	30	29	16	31	17	17	3.5391	3.4474	1.7874	3.0079	2.1661	1.9729	2.92463	2.3823	-0.295901	0.867846
miR-580-y	23	TTGAGAATGATGAATCATTAGGA	2	0	0	2	0	0	0	0	0	0.2234	0	0	0	0.0744667	0.01	-2.89659	0.855212
miR-582-x	23	TTACAGTTGTTCAACCAGTTACT	8	0	2	6	0	0	0	0	0.2378	0.6703	0	0	0	0.3027	0.01	-4.91982	0.230255
miR-582-y	22	TAACTGGTTGAACAACTGAACC	4	0	2	2	0	0	0	0	0.2378	0.2234	0	0	0	0.153733	0.01	-3.94236	0.43129
miR-584-x	21	TTATGGTTTGCCTGGGACTGA	4	0	0	4	0	0	0	0	0	0.4469	0	0	0	0.148967	0.01	-3.89692	0.656664
miR-5892-y	18	AACATTTGGCTCATTTGA	2	0	0	0	0	0	2	0	0	0	0	0	0.2321	0.01	0.0773667	2.95171	0.787463
miR-589-x	21	TGAGAACCACGTCTGCTCTGA	15	0	0	15	0	0	0	0	0	1.6757	0	0	0	0.558567	0.01	-5.80366	0.118145
miR-5928-x	19	ATTGAAAGTAAAGTAGGTT	2	2	0	0	0	0	0	0.2359	0	0	0	0	0	0.0786333	0.01	-2.97514	0.818831
miR-5991-y	20	TGAGGTAGTAGGTTGTATTC	2	0	0	0	2	0	0	0	0	0	0.1941	0	0	0.01	0.0647	2.69377	0.787651
miR-599-y	19	TTTGTGACAGTTTATGAAA	2	2	0	0	0	0	0	0.2359	0	0	0	0	0	0.0786333	0.01	-2.97514	0.810507
miR-6012-y	22	TTCGGCGATGAGATCAGCCAGT	5056	820	650	1148	862	881	695	96.734	77.2698	128.247	83.6389	112.255	80.6579	100.75	92.184	-0.128193	0.933555
miR-6016-x	18	ACTTGTGGGCGTGGGTTT	4	0	4	0	0	0	0	0	0.4755	0	0	0	0	0.1585	0.01	-3.98641	0.642804
miR-607-x	18	AGTTCTGAATTGGAACCC	2	0	0	2	0	0	0	0	0	0.2234	0	0	0	0.0744667	0.01	-2.89659	0.859471
miR-6094-y	18	TTCGAGACCACTGCAGAT	3	0	0	0	0	3	0	0	0	0	0	0.3823	0	0.01	0.127433	3.67167	0.684306
miR-6134-y	21	TGAGGTAGTAGGATGTATAGT	43	9	12	3	10	0	9	1.0617	1.4265	0.3351	0.9703	0	1.0445	0.9411	0.6716	-0.486746	0.83741
miR-616-x	22	ACTCAAAACCCTTCAGTGACTT	2	0	0	2	0	0	0	0	0	0.2234	0	0	0	0.0744667	0.01	-2.89659	0.831162
miR-61-y	21	TGACTAGATCCATACTCATCC	335	56	41	56	65	62	55	6.6062	4.8739	6.2559	6.3069	7.8999	6.383	5.912	6.86327	0.215249	0.470479
miR-6240-x	19	CAAAGCATTGCGAGGGCCC	117	24	13	15	20	26	19	2.8312	1.5454	1.6757	1.9406	3.3129	2.205	2.01743	2.48617	0.301402	0.507255
miR-625-x	22	AGGGGGAAAGTTCTATAGTCCT	2	0	0	2	0	0	0	0	0	0.2234	0	0	0	0.0744667	0.01	-2.89659	0.841805
miR-625-y	23	GACTATAGAACTTTCCCCCTCAT	4	0	4	0	0	0	0	0	0.4755	0	0	0	0	0.1585	0.01	-3.98641	0.645259
miR-628-y	21	TCTAGTAAGAGTGGCAGTCGA	6	0	0	6	0	0	0	0	0	0.6703	0	0	0	0.223433	0.01	-4.48177	0.594705
miR-629-x	21	TGGGTTTACGTTGGGAGAACT	2	0	0	2	0	0	0	0	0	0.2234	0	0	0	0.0744667	0.01	-2.89659	0.858791
miR-629-y	22	GTTCTCCCAACGTAAGCCCAGT	2	0	0	2	0	0	0	0	0	0.2234	0	0	0	0.0744667	0.01	-2.89659	0.856285
miR-638-x	19	CCCCGGGCGGGCCGCGGCC	2	0	0	2	0	0	0	0	0	0.2234	0	0	0	0.0744667	0.01	-2.89659	0.83742
miR-63-y	22	TATGACACTGAAGCGAGATGGT	202	36	32	34	37	30	33	4.2469	3.8041	3.7982	3.5901	3.8225	3.8298	3.94973	3.74747	-0.0758396	0.895556
miR-642-y	22	AGACACATTTGGAGAGGGAACC	2	0	0	2	0	0	0	0	0	0.2234	0	0	0	0.0744667	0.01	-2.89659	0.837465
miR-6497-x	19	TGGCTCTGAGGACCGGGGC	145	10	28	35	17	33	22	1.1797	3.3285	3.91	1.6495	4.2048	2.5532	2.80607	2.8025	-0.00183491	0.834875
miR-6501-x	23	AGTTGCCAGGGCTGCCTTTGGTG	2	0	0	2	0	0	0	0	0	0.2234	0	0	0	0.0744667	0.01	-2.89659	0.859375
miR-652-y	22	AATGGCGCCACTAGGGTTGTGT	39	0	4	31	0	4	0	0	0.4755	3.4631	0	0.5097	0	1.31287	0.1699	-2.94996	0.112543
miR-6542-x	18	ATCTGCCAGGATCAGCCC	2	0	0	0	0	2	0	0	0	0	0	0.2548	0	0.01	0.0849333	3.08633	0.794332
miR-654-y	20	TATGTCTGCTGACCATCACC	14	0	0	14	0	0	0	0	0	1.564	0	0	0	0.521333	0.01	-5.70413	0.137731
miR-6580-x	18	ATTTACTTCATTGCTGAC	2	0	0	0	0	2	0	0	0	0	0	0.2548	0	0.01	0.0849333	3.08633	0.788141
miR-660-x	23	TACCCATTGCATATCGGAGTTGT	3	0	0	3	0	0	0	0	0	0.3351	0	0	0	0.1117	0.01	-3.48156	0.706038
miR-664-y	24	TATTCATTTATCCCCAGCCTACAA	2	0	0	2	0	0	0	0	0	0.2234	0	0	0	0.0744667	0.01	-2.89659	0.831723
miR-6651-x	20	CCAGGTTGGCTAAGGAGAGG	3	0	0	0	0	3	0	0	0	0	0	0.3823	0	0.01	0.127433	3.67167	0.684995
miR-6696-x	18	GCTGTGAACTGAAGCCCC	6	0	0	0	0	6	0	0	0	0	0	0.7645	0	0.01	0.254833	4.67148	0.419983
miR-669-x	20	TTGTTCTGTGTGCATGTATA	2	0	2	0	0	0	0	0	0.2378	0	0	0	0	0.0792667	0.01	-2.98671	0.808165
miR-6739-x	18	TAGAGAAAGAACAAGTGA	2	0	0	2	0	0	0	0	0	0.2234	0	0	0	0.0744667	0.01	-2.89659	0.860403
miR-6756-x	18	TGGCTGGTGGTGGGGCTG	2	0	0	0	2	0	0	0	0	0	0.1941	0	0	0.01	0.0647	2.69377	0.78712
miR-67-y	20	TCACAACCTCCTTGAGTGAG	12626	1860	1888	2265	2255	2360	1998	219.421	224.439	253.03	218.8	300.706	231.877	232.297	250.461	0.108617	0.507332
miR-6802-y	22	CTTCACCCCTCTCACCTAAGCA	2	0	0	2	0	0	0	0	0	0.2234	0	0	0	0.0744667	0.01	-2.89659	0.83478
miR-6841-y	18	CATTTCATCTGCATCCCC	2	2	0	0	0	0	0	0.2359	0	0	0	0	0	0.0786333	0.01	-2.97514	0.812223
miR-6893-x	18	GCAAGCAGGTGTAGCGTG	2	0	2	0	0	0	0	0	0.2378	0	0	0	0	0.0792667	0.01	-2.98671	0.80383
miR-6931-x	18	GAGGTGGGGAGGGGGGGA	7	3	2	2	0	0	0	0.3539	0.2378	0.2234	0	0	0	0.2717	0.01	-4.76394	0.123706
miR-6958-x	19	AGAGAAGAGACTGCTGTGG	2	0	0	0	0	2	0	0	0	0	0	0.2548	0	0.01	0.0849333	3.08633	0.795159
miR-701-x	19	AATTAGCCGCCGACATAGA	4	0	0	0	2	2	0	0	0	0	0.1941	0.2548	0	0.01	0.149633	3.90336	0.413372
miR-7035-y	19	TTCTGTGGATCAGAGGCAC	2	2	0	0	0	0	0	0.2359	0	0	0	0	0	0.0786333	0.01	-2.97514	0.814984
miR-7044-x	18	GGTGGTGGTGGTGGCGGC	4	0	0	2	0	2	0	0	0	0.2234	0	0.2548	0	0.0744667	0.0849333	0.189736	1
miR-705-x	19	GTGGGAGGTTGGGTGGGTC	2	2	0	0	0	0	0	0.2359	0	0	0	0	0	0.0786333	0.01	-2.97514	0.819934
miR-71-x	21	TGAAAGACATGGGTAGTGAGA	161764	28088	23903	29569	33927	23343	22934	3313.49	2841.51	3303.24	3291.9	2974.32	2661.59	3152.75	2975.94	-0.0832665	0.828979
miR-71-y	22	TCTCACTACCTTGTCTTTCATG	24212	4215	3489	4291	5214	3651	3352	497.236	414.761	479.361	505.909	465.203	389.015	463.786	453.375	-0.0327531	0.742897
miR-72-x	25	AGGCAAGATGTCGGCATAGCTGAAT	511	79	79	62	89	113	89	9.3195	9.3913	6.9262	8.6356	14.3982	10.3289	8.54567	11.1209	0.380009	0.283364
miR-7424-x	18	CCCGTTACTCTGTATGCC	3	0	0	0	0	3	0	0	0	0	0	0.3823	0	0.01	0.127433	3.67167	0.683582
miR-744-x	22	TGCGGGGCTAGGGCTAACAGCA	39	3	7	25	2	2	0	0.3539	0.8321	2.7928	0.1941	0.2548	0	1.32627	0.149633	-3.14787	0.0124424
miR-745-y	22	TAGCTGCCTAGTGAAGGGTAAC	9115	1567	1420	2010	1312	1617	1189	184.856	168.805	224.543	127.302	206.035	137.989	192.735	157.108	-0.294856	0.753201
miR-747-x	20	TAATCTCATGTGGTAACTGA	48	10	3	4	11	11	9	1.1797	0.3566	0.4469	1.0673	1.4016	1.0445	0.661067	1.17113	0.825038	0.241602
miR-750-y	22	CCAGATCTAACTCTTCCAGCTC	30493	815	796	848	713	26596	725	96.1442	94.6258	94.7327	69.1816	3388.81	84.1395	95.1676	1180.71	3.63304	0.000626178
miR-753-y	19	TGAGATCATTGTTAAAGCT	28	5	2	5	14	2	0	0.5898	0.2378	0.5586	1.3584	0.2548	0	0.462067	0.537733	0.21879	0.784378
miR-7550-x	18	TCCGGCCCGGAGGACCAT	977	178	197	157	165	131	149	20.9984	23.4187	17.539	16.0098	16.6917	17.2921	20.652	16.6645	-0.309503	0.757961
miR-755-y	21	TGAGATTCAACTCCTTCAACT	4	0	0	0	2	0	2	0	0	0	0.1941	0	0.2321	0.01	0.142067	3.8285	0.409777
miR-7614-y	19	TGTAACAGAACTGAAAATA	2	2	0	0	0	0	0	0.2359	0	0	0	0	0	0.0786333	0.01	-2.97514	0.82059
miR-766-y	22	ACTCCAGCCCCACAGCCTCAGC	7	0	2	5	0	0	0	0	0.2378	0.5586	0	0	0	0.265467	0.01	-4.73046	0.25328
miR-769-x	22	TGAGACCTCTGGGTTCTGAGCT	34	0	6	28	0	0	0	0	0.7133	3.128	0	0	0	1.28043	0.01	-7.00049	0.00267749
miR-76-y	22	TTCGTTGTCTACGAAACCTGCT	29	8	4	0	11	4	2	0.9437	0.4755	0	1.0673	0.5097	0.2321	0.473067	0.603033	0.350194	0.716851
miR-7865-x	20	CAGGGAGGGAAGGGGAGGGA	55	2	6	14	4	27	2	0.2359	0.7133	1.564	0.3881	3.4403	0.2321	0.837733	1.3535	0.692132	0.454746
miR-7911-x	18	GTCCCGGCCGATGCACCA	688	110	128	119	119	116	96	12.9765	15.2162	13.2939	11.5464	14.7805	11.1412	13.8289	12.4894	-0.146983	0.978372
miR-7975-y	18	ATCCTGGTCACGGCACCA	622	77	121	96	88	81	159	9.0836	14.3841	10.7245	8.5385	10.3208	18.4527	11.3974	12.4373	0.125972	0.57626
miR-7977-x	18	TTCCCGGCCATCGCACCA	4359	842	689	716	935	574	603	99.3293	81.906	79.9865	90.722	73.1379	69.9809	87.0739	77.9469	-0.159749	0.985417
miR-79-x	23	TCTTTGGTTATCTGGCTGTATGA	668	110	105	114	135	101	103	12.9765	12.4821	12.7353	13.0989	12.8692	11.9536	12.7313	12.6406	-0.0103186	0.741298
miR-79-y	20	ATAAAGCTAGATTACCGAAG	16204	2939	2391	2836	3228	2425	2385	346.709	284.234	316.818	313.209	308.988	276.79	315.92	299.663	-0.0762221	0.8252
miR-7-x	24	TGGAAGACTAGTGATTTTGTTGTT	250677	38825	46137	35313	63543	25537	41322	4580.12	5484.61	3944.92	6165.51	3253.87	4795.61	4669.89	4738.33	0.0209908	0.652037
miR-7-y	21	CAAGAAATCACTCATCTTCCT	36884	5794	6592	6600	7179	4434	6285	683.509	783.635	737.306	696.571	564.971	729.403	734.817	663.648	-0.146966	0.952044
miR-802-x	22	TCAGTAACAAAGATTCATCCTT	2	2	0	0	0	0	0	0.2359	0	0	0	0	0	0.0786333	0.01	-2.97514	0.816176
miR-804-y	18	GTGAGTTGGACCTCACCT	2	0	0	0	2	0	0	0	0	0	0.1941	0	0	0.01	0.0647	2.69377	0.783839
miR-8101-x	21	GGCGAGCGAAACCGGAGGAGC	2	0	0	0	0	2	0	0	0	0	0	0.2548	0	0.01	0.0849333	3.08633	0.78688
miR-81-y	19	TGAGATCATTGTGAAAGCT	56673	9344	9776	9179	11344	8541	8489	1102.3	1162.14	1025.41	1100.7	1088.28	985.187	1096.62	1058.05	-0.0516468	0.772971
miR-8222-y	21	TCCCTGAGGTTCTCGCTGCCG	620	136	123	73	84	123	81	16.0437	14.6218	8.1551	8.1504	15.6724	9.4004	12.9402	11.0744	-0.224631	0.887287
miR-8230-x	21	TAATCTCACCCGGTGTGTAGT	10	0	2	0	0	8	0	0	0.2378	0	0	1.0193	0	0.0792667	0.339767	2.09976	0.52872
miR-8247-y	18	TAATGTAACAGTGGCACT	5	0	0	0	0	3	2	0	0	0	0	0.3823	0.2321	0.01	0.2048	4.35614	0.329853
miR-82-y	19	TGAGATCATTGTGAAAGCC	14	0	3	3	2	2	4	0	0.3566	0.3351	0.1941	0.2548	0.4642	0.230567	0.304367	0.400626	0.877989
miR-8332-y	18	AAAAAGACCAGAAGAGCA	2	0	2	0	0	0	0	0	0.2378	0	0	0	0	0.0792667	0.01	-2.98671	0.803977
miR-8348-y	18	CCTGAAGAATCTCAGATT	3	3	0	0	0	0	0	0.3539	0	0	0	0	0	0.117967	0.01	-3.56031	0.703331
miR-8378-y	20	ATATTATGCACAGTAGAATG	3	3	0	0	0	0	0	0.3539	0	0	0	0	0	0.117967	0.01	-3.56031	0.70245
miR-8420-x	18	CTGGCGAACATTGTATAA	10	0	0	0	0	10	0	0	0	0	0	1.2742	0	0.01	0.424733	5.40849	0.180109
miR-84-y	19	ATCAATATTGTATTCTACT	4	0	0	0	0	4	0	0	0	0	0	0.5097	0	0.01	0.1699	4.08661	0.608494
miR-8511-x	19	TCAGTCTTTTTCTCTTTCC	8	0	0	5	3	0	0	0	0	0.5586	0.2911	0	0	0.1862	0.0970333	-0.940301	1
miR-8517-x	19	ATTGCACTGTTCTCTCACT	19	3	0	6	5	3	2	0.3539	0	0.6703	0.4851	0.3823	0.2321	0.3414	0.3665	0.10235	0.896774
miR-8549-x	20	TGAGGTAGTAGGTTGTATTT	174	23	27	35	41	31	17	2.7133	3.2097	3.91	3.9782	3.95	1.9729	3.27767	3.30037	0.00995717	0.777133
miR-86-x	24	TAAGTGAATGCTTTGCCACAGTCT	19	4	5	5	2	0	3	0.4719	0.5944	0.5586	0.1941	0	0.3482	0.541633	0.180767	-1.58319	0.30977
miR-873-x	19	TGCAGGAACTTGTGAGTCT	40	0	0	40	0	0	0	0	0	4.4685	0	0	0	1.4895	0.01	-7.21868	0.0105268
miR-874-y	23	CTGCCCTGGCCCGAGGGACCGAC	21	0	4	17	0	0	0	0	0.4755	1.8991	0	0	0	0.791533	0.01	-6.30658	0.0183896
miR-876-x	21	TGGATTTCTTTGTGAATCACC	3	0	0	3	0	0	0	0	0	0.3351	0	0	0	0.1117	0.01	-3.48156	0.707169
miR-877-y	22	TCCTCTTCTCCCTCCTCCCAGT	2	0	0	2	0	0	0	0	0	0.2234	0	0	0	0.0744667	0.01	-2.89659	0.843672
miR-8799-y	19	GTTCGACTCGCGCTCCAGG	13	0	0	2	0	11	0	0	0	0.2234	0	1.4016	0	0.0744667	0.4672	2.64937	0.389736
miR-87-y	22	ATGAGCAAAGTTTCAGGTGTGT	116600	19115	18719	16456	29550	14314	18446	2254.96	2225.25	1838.35	2867.2	1823.86	2140.74	2106.19	2277.27	0.11267	0.496879
miR-889-y	21	TTAATATCGGACAACCATTGT	2	0	0	2	0	0	0	0	0	0.2234	0	0	0	0.0744667	0.01	-2.89659	0.837359
miR-891-x	18	CACCATGTGGCACTGAGG	3	0	0	0	3	0	0	0	0	0	0.2911	0	0	0.01	0.0970333	3.27848	0.653819
miR-8946-x	18	TGCAGGAGGAACTGCTGG	2	2	0	0	0	0	0	0.2359	0	0	0	0	0	0.0786333	0.01	-2.97514	0.821272
miR-8957-y	19	TCCATTCTCTGAGCCACCC	2	0	0	0	0	0	2	0	0	0	0	0	0.2321	0.01	0.0773667	2.95171	0.787091
miR-8993-y	18	TCACCTTGATCTTTGACC	9	0	3	2	2	0	2	0	0.3566	0.2234	0.1941	0	0.2321	0.193333	0.142067	-0.444522	1
miR-8999-x	18	TGGCCCTGCAGTTTCTGC	2	0	0	0	0	2	0	0	0	0	0	0.2548	0	0.01	0.0849333	3.08633	0.79408
miR-8-x	22	CATCTTACCGGGCAGCATTAGA	319449	51802	43839	64164	47380	63517	48747	6111	5211.43	7167.96	4597.23	8093.2	5657.31	6163.46	6115.91	-0.0111729	0.715365
miR-8-y	21	TAATACTGTCAGGTAAAGATG	1306244	199780	220126	228537	213530	219708	224563	23567.7	26167.8	25530.6	20718.6	27994.7	26061.6	25088.7	24925	-0.00944732	0.686799
miR-9095-y	18	AGTTCGATTCTGGCCATC	6	0	0	0	0	6	0	0	0	0	0	0.7645	0	0.01	0.254833	4.67148	0.4194
miR-90-y	19	TGTTGGTTTGAATGGCACT	2	0	2	0	0	0	0	0	0.2378	0	0	0	0	0.0792667	0.01	-2.98671	0.803511
miR-9122-y	18	ATCACGCCTGGCTGAGGG	4	0	2	0	0	0	2	0	0.2378	0	0	0	0.2321	0.0792667	0.0773667	-0.0350022	1
miR-9138-x	20	TTCTGGCACCGTTCCTCTGC	2	0	2	0	0	0	0	0	0.2378	0	0	0	0	0.0792667	0.01	-2.98671	0.804611
miR-9226-x	18	TCCCTGTTCGGGCGCCAT	655	98	97	121	161	99	79	11.5609	11.531	13.5173	15.6217	12.6144	9.1683	12.2031	12.4681	0.0310017	0.677052
miR-9226-y	19	TCCCTGTTCGGGCGCCAAA	4	0	2	2	0	0	0	0	0.2378	0.2234	0	0	0	0.153733	0.01	-3.94236	0.432502
miR-9277-y	18	ATCCTGCCGACTACGCCA	43	2	6	29	4	0	2	0.2359	0.7133	3.2397	0.3881	0	0.2321	1.3963	0.206733	-2.75577	0.0422704
miR-927-x	22	TTTAGAATTCCTACGCTTTACC	747776	122750	132074	126981	139570	95405	130996	14480.6	15700.5	14185.4	13542.3	12156.3	15202.7	14788.9	13633.8	-0.117326	0.894736
miR-927-y	22	CAAAGCGTTTGAATTCTGAAAC	9065	1493	1450	1491	1799	1318	1514	176.127	172.371	166.564	174.555	167.937	175.707	171.687	172.733	0.00875817	0.66701
miR-929-x	21	AAATTGACTCTAGTAGGGAGT	39055	7176	5080	8130	6579	6199	5891	846.541	603.894	908.227	638.353	789.863	683.677	786.221	703.965	-0.159431	0.986301
miR-929-y	22	CTCCCTAATGGAGTCAGATTGT	605	87	92	118	112	104	92	10.2632	10.9367	13.1821	10.8672	13.2515	10.677	11.4607	11.5986	0.0172556	0.704679
miR-92-x	23	AGGTTGGGATCGGTTGCAATGCT	4	0	4	0	0	0	0	0	0.4755	0	0	0	0	0.1585	0.01	-3.98641	0.644485
miR-92-y	22	AATTGCACTTGTCCCGGCCTGA	127212	23793	20766	23108	23262	18315	17968	2806.82	2468.59	2581.47	2257.09	2333.66	2085.27	2618.96	2225.34	-0.23497	0.860335
miR-9328-x	19	GCCTCGGCCTCCCGCCCCC	2	0	2	0	0	0	0	0	0.2378	0	0	0	0	0.0792667	0.01	-2.98671	0.809955
miR-932-x	23	TCAATTCCGTAGTGCATTGCAGT	23684	4212	3792	5000	3754	3440	3486	496.883	450.78	558.565	364.247	438.317	404.566	502.076	402.377	-0.319359	0.709466
miR-932-y	22	TGCAAGCAGTGCGGAAGTGAGG	1901	360	350	274	374	262	281	42.4686	41.6068	30.6094	36.2888	33.3835	32.6113	38.2283	34.0945	-0.165099	1
miR-9333-x	18	ACAACAGCCGCACTGAGG	2	0	0	0	0	0	2	0	0	0	0	0	0.2321	0.01	0.0773667	2.95171	0.789115
miR-9394-y	18	TGTCGAGAGTTCGATTCT	2	0	0	0	0	2	0	0	0	0	0	0.2548	0	0.01	0.0849333	3.08633	0.78671
miR-93-x	23	CAAAGTGCTGTTCGTGCAGGTAG	36	3	6	22	2	3	0	0.3539	0.7133	2.4577	0.1941	0.3823	0	1.17497	0.192133	-2.61244	0.0336394
miR-93-y	23	ACTGCTGAGCTAGCACTTCCCGA	8	0	2	6	0	0	0	0	0.2378	0.6703	0	0	0	0.3027	0.01	-4.91982	0.230529
miR-9400-x	18	ACAAGGAGAATGAAAGAA	2	2	0	0	0	0	0	0.2359	0	0	0	0	0	0.0786333	0.01	-2.97514	0.815086
miR-9403-x	18	TATTTTGCCTCTTGAACA	19	5	4	0	0	2	8	0.5898	0.4755	0	0	0.2548	0.9284	0.3551	0.3944	0.151434	0.923801
miR-941-y	23	CACCCGGCTGTGTGCACATGTGC	6	0	0	4	0	2	0	0	0	0.4469	0	0.2548	0	0.148967	0.0849333	-0.810587	0.916857
miR-9501-y	18	TTGTGGGTTATTGTTAAA	2	0	0	2	0	0	0	0	0	0.2234	0	0	0	0.0744667	0.01	-2.89659	0.853758
miR-95-y	21	TTCAACGGGTATTTATTGAGC	2	0	0	2	0	0	0	0	0	0.2234	0	0	0	0.0744667	0.01	-2.89659	0.834396
miR-962-x	18	TTATTAGGTAGAGATATT	2	0	0	0	0	2	0	0	0	0	0	0.2548	0	0.01	0.0849333	3.08633	0.793655
miR-965-x	19	CGGGAGAAGCTGTAGCGAT	41	6	6	6	6	5	12	0.7078	0.7133	0.6703	0.5822	0.6371	1.3927	0.697133	0.870667	0.320686	0.581181
miR-965-y	21	TAAGCGTATAGCTTTTCCCCT	13901	2409	2195	2823	2536	2030	1908	284.186	260.934	315.366	246.065	258.658	221.432	286.829	242.052	-0.244873	0.849057
miR-96-x	21	TTTGGCACTGGCACATTTTTG	1505	123	240	517	307	117	201	14.5101	28.5304	57.7557	29.7879	14.9079	23.327	33.5987	22.6743	-0.567351	0.516685
miR-971-x	23	CACTCTAAGCTCGAACACCAAGC	50643	8905	8112	9471	8870	7188	8097	1050.51	964.328	1058.03	860.646	915.88	939.694	1024.29	905.407	-0.177987	0.977974
miR-971-y	20	TTGGTGTTCAACCTTACAGT	4986	805	786	864	1052	754	725	94.9645	93.4371	96.5201	102.074	96.0731	84.1395	94.9739	94.0957	-0.0134028	0.722125
miR-972-y	18	TTTGGACAATATTAACAT	81	21	12	15	14	10	9	2.4773	1.4265	1.6757	1.3584	1.2742	1.0445	1.85983	1.2257	-0.601567	0.549822
miR-980-y	20	TAGCTGCCTAGTGAAGGGTA	1173	210	199	212	204	187	161	24.7734	23.6565	23.6832	19.7939	23.8271	18.6848	24.0377	20.7686	-0.210895	0.917465
miR-981-y	19	TTCGTTGTCGACGAAACCT	2461189	443831	339444	503533	440234	389689	344458	52358	40352	56251.2	42715.4	49653.3	39975.9	49653.7	44114.9	-0.170636	0.991111
miR-9822-y	18	ACTGGATGGATCAGAGCA	2	0	0	0	0	0	2	0	0	0	0	0	0.2321	0.01	0.0773667	2.95171	0.788195
miR-98-x	19	TGAGGTAGTAGGTTGTATT	909	153	131	185	197	126	117	18.0492	15.5728	20.6669	19.1147	16.0547	13.5784	18.0963	16.2493	-0.15532	0.977991
miR-993-x	22	TACCCTGTAGATCCGGGCTTTT	1763	336	224	349	265	350	239	39.6374	26.6284	38.9879	25.7127	44.5963	27.737	35.0846	32.682	-0.10234	0.909119
miR-993-y	23	GAAGCTCGTCTCTACAGGTATCT	14027	2181	2285	2398	2654	2284	2225	257.289	271.633	267.888	257.515	291.022	258.221	265.603	268.92	0.0179011	0.651947
miR-995-y	21	TAGCACCACATGATTCAGCTT	63842	9734	12793	8610	15265	7558	9882	1148.3	1520.79	961.849	1481.15	963.024	1146.85	1210.31	1197.01	-0.0159497	0.717842
miR-996-y	20	TGACTAGATTTACACTCATC	81236	13789	12292	15417	14152	13441	12145	1626.67	1461.23	1722.28	1373.15	1712.62	1409.48	1603.39	1498.42	-0.0976859	0.866233
miR-998-y	21	TAGCACCATGGGATTCAGCTT	11812	1777	1636	1763	2660	1958	2018	209.63	194.482	196.95	258.097	249.484	234.198	200.354	247.26	0.303476	0.244919
miR-9993-y	18	ATCTCGGTGGGACCTCCA	673	108	108	115	125	92	125	12.7406	12.8387	12.847	12.1286	11.7224	14.5068	12.8088	12.7859	-0.00257409	0.725219
miR-9995-y	18	ATCTCGGTGGAACCTCCA	17	0	4	10	0	3	0	0	0.4755	1.1171	0	0.3823	0	0.530867	0.127433	-2.05861	0.314282
miR-99-x	20	AACCCGTAGATCCGAACTTG	174340	29231	27446	26995	38294	25571	26803	3448.33	3262.69	3015.69	3715.62	3258.2	3110.61	3242.24	3361.48	0.052106	0.579016
miR-9-x	20	TCTTTGGTATCCTAGCTGTA	42326	7003	6967	6316	9958	5514	6568	826.132	828.214	705.58	966.214	702.582	762.246	786.642	810.347	0.0428335	0.602284
miR-9-y	22	ATAAAGCTAGATTACCGAAGTC	93077	14996	15574	15046	19054	13016	15391	1769.05	1851.39	1680.83	1848.79	1658.47	1786.2	1767.09	1764.49	-0.00212914	0.675447
miR-9-z	23	TCTTTGGTTATCTAGCTGTATGA	640306	105877	118878	106795	123193	82800	102763	12490.1	14131.8	11930.4	11953.3	10550.2	11926.1	12850.8	11476.5	-0.16317	0.990209
mir-iab-4-x	22	ACGTATACTGAATGTATCCTGA	176	9	8	26	13	109	11	1.0617	0.951	2.9045	1.2614	13.8885	1.2766	1.63907	5.4755	1.74012	0.0455924
mir-iab-4-y	22	TATACCTTCAGTATACGTAACT	3	0	0	0	0	3	0	0	0	0	0	0.3823	0	0.01	0.127433	3.67167	0.686051
mir-iab-8-x	19	TACGTATACTGAAGGTATA	17	4	2	2	0	9	0	0.4719	0.2378	0.2234	0	1.1468	0	0.311033	0.382267	0.29751	0.921695
mir-iab-8-y	22	CAGGATACATTCAGTATACGTA	7	0	0	0	0	7	0	0	0	0	0	0.8919	0	0.01	0.2973	4.89385	0.343024
novel-m0001-3p	22	CTGGTAGCATTTGTACTGTGCT	22	0	7	2	5	3	5	0	0.8321	0.2234	0.4851	0.3823	0.5803	0.351833	0.482567	0.455836	0.740562
novel-m0002-5p	20	TGATGTTATGCTGTGTCACT	508	104	71	79	96	89	69	12.2687	8.4402	8.8253	9.3148	11.3402	8.0078	9.84473	9.55427	-0.043207	0.825862
novel-m0003-5p	20	TGTGAAAGTCACTTGTCATG	16	2	3	0	3	4	4	0.2359	0.3566	0	0.2911	0.5097	0.4642	0.1975	0.421667	1.09425	0.381154
novel-m0004-5p	22	AGGCCATCAGCCATGTCAGGTG	6	0	0	0	6	0	0	0	0	0	0.5822	0	0	0.01	0.194067	4.27848	0.469512
novel-m0005-5p	21	TGGGCTCTTCTGGGGTGTTAC	10	3	2	3	2	0	0	0.3539	0.2378	0.3351	0.1941	0	0	0.308933	0.0647	-2.25546	0.351994
novel-m0006-3p	22	CGAAACGTCGGGAGCCACTCAC	6	0	4	0	0	0	2	0	0.4755	0	0	0	0.2321	0.1585	0.0773667	-1.0347	0.91016
novel-m0007-5p	22	TCTGGGATGTGACGCCGTGTCT	19	5	2	4	2	6	0	0.5898	0.2378	0.4469	0.1941	0.7645	0	0.424833	0.319533	-0.410931	1
novel-m0008-3p	22	TCTAGTACTGCTTGACCCTTGA	29	3	0	8	7	5	6	0.3539	0	0.8937	0.6792	0.6371	0.6963	0.415867	0.670867	0.689905	0.417532
novel-m0009-5p	21	TGGTTGGCGACATTTTGGGAC	82	17	12	13	9	12	19	2.0055	1.4265	1.4523	0.8733	1.529	2.205	1.6281	1.53577	-0.0842303	0.959307
novel-m0010-3p	22	AATGACATTGTGTAGTGACCTG	26	9	5	0	2	2	8	1.0617	0.5944	0	0.1941	0.2548	0.9284	0.552033	0.4591	-0.265947	1
novel-m0011-3p	22	TTCGGCCGAGCGCTTGCTGGGA	18	0	6	3	0	6	3	0	0.7133	0.3351	0	0.7645	0.3482	0.349467	0.3709	0.0858754	1
novel-m0012-3p	23	CAATCTGAGGCCCCGTACTCTGT	6	2	0	4	0	0	0	0.2359	0	0.4469	0	0	0	0.2276	0.01	-4.50843	0.315333
novel-m0013-3p	21	CTTGTGCGTGTGACATTAGCT	6739	1066	1153	951	1820	817	932	125.754	137.065	106.239	176.593	104.1	108.163	123.019	129.619	0.0753873	0.578565
novel-m0014-5p	24	AGACACCTGAACCCGGTTAACACA	66	5	28	9	11	8	5	0.5898	3.3285	1.0054	1.0673	1.0193	0.5803	1.64123	0.888967	-0.884579	0.423117
novel-m0015-5p	20	ATCTTCCTTGTAGTGGGACT	16	7	0	0	4	2	3	0.8258	0	0	0.3881	0.2548	0.3482	0.275267	0.330367	0.263238	0.907693
novel-m0016-3p	22	CCTAGTTGGTAGCCGAGTAAGT	13	6	2	0	0	0	5	0.7078	0.2378	0	0	0	0.5803	0.3152	0.193433	-0.704431	0.830661
novel-m0017-5p	21	TACAGTAAACCGCACTGTACT	11	3	2	2	0	4	0	0.3539	0.2378	0.2234	0	0.5097	0	0.2717	0.1699	-0.677329	0.765407
novel-m0018-3p	22	CATGGCATCACATCTCAGAAGA	9	0	0	0	7	0	2	0	0	0	0.6792	0	0.2321	0.01	0.303767	4.92489	0.148597
novel-m0019-3p	22	CGAGCGTAAGTGGGCTTTGTCT	24	0	0	0	0	24	0	0	0	0	0	3.058	0	0.01	1.01933	6.67148	0.0229543
novel-m0020-3p	22	CTTGACCCTGAAGATGGAGGCA	25	0	8	7	0	6	4	0	0.951	0.782	0	0.7645	0.4642	0.577667	0.409567	-0.496139	0.862414
novel-m0021-3p	21	TCTGCTGTTAAAGTTGAGACC	22	2	0	9	6	3	2	0.2359	0	1.0054	0.5822	0.3823	0.2321	0.413767	0.398867	-0.0529109	1
novel-m0022-3p	22	AAGATAGAGTCAGTAGGTTCCT	8	0	0	6	0	2	0	0	0	0.6703	0	0.2548	0	0.223433	0.0849333	-1.39544	0.816608
novel-m0023-5p	23	GCACCTTGGATCCTGCTATAAGT	25	0	7	3	8	3	4	0	0.8321	0.3351	0.7762	0.3823	0.4642	0.389067	0.5409	0.475345	0.674262
novel-m0024-5p	22	GAATGATTTATTACACACATCA	110	17	6	15	28	18	26	2.0055	0.7133	1.6757	2.7168	2.2935	3.0174	1.46483	2.6759	0.869288	0.119988
novel-m0025-5p	22	TTCTTATTTGTGTGATGTGTGT	49	10	2	8	12	9	8	1.1797	0.2378	0.8937	1.1643	1.1468	0.9284	0.7704	1.07983	0.487129	0.452865
novel-m0026-3p	22	TCACATTCGAGGAGACACTAAT	159	10	25	37	33	35	19	1.1797	2.9719	4.1334	3.202	4.4596	2.205	2.76167	3.28887	0.252051	0.531458
novel-m0027-3p	22	AAACCTTGCACCATGAACGATT	46	6	10	9	11	7	3	0.7078	1.1888	1.0054	1.0673	0.8919	0.3482	0.967333	0.769133	-0.330779	0.868303
novel-m0028-3p	22	TAGGTTGCCCAGAAACGTCAGT	209	37	37	29	47	30	29	4.3648	4.3984	3.2397	4.5604	3.8225	3.3656	4.00097	3.91617	-0.0309064	0.821222
novel-m0029-3p	20	CTGTTCTGAATTGTTGGAGC	11	4	3	0	4	0	0	0.4719	0.3566	0	0.3881	0	0	0.276167	0.129367	-1.09407	0.801957
novel-m0030-3p	20	TACTTGACCTTGAAGATGAA	8	0	0	3	2	3	0	0	0	0.3351	0.1941	0.3823	0	0.1117	0.192133	0.782479	0.888665
novel-m0031-3p	22	CTAACCTTGGCACTAGATGGAG	10	0	2	3	5	0	0	0	0.2378	0.3351	0.4851	0	0	0.190967	0.1617	-0.240001	1
novel-m0032-3p	24	TGGATCGGTGGATCCATCTTGGCC	7	4	0	0	0	0	3	0.4719	0	0	0	0	0.3482	0.1573	0.116067	-0.438565	1
novel-m0033-5p	22	TCTGGGATATGGTGCTGTGTAG	23	4	5	2	6	3	3	0.4719	0.5944	0.2234	0.5822	0.3823	0.3482	0.4299	0.437567	0.0255017	1
novel-m0034-3p	21	AGACGATGTTGCATCCCAGAA	147	27	29	21	23	21	26	3.1851	3.4474	2.346	2.2317	2.6758	3.0174	2.99283	2.64163	-0.180082	1
novel-m0034-5p	21	TGGGATGTGACACTGTGTTGT	51	10	7	5	14	5	10	1.1797	0.8321	0.5586	1.3584	0.6371	1.1605	0.8568	1.052	0.296104	0.554114
novel-m0035-5p	23	TGGCTACTCAGACAAAGGGACGT	206	37	36	42	39	32	20	4.3648	4.2796	4.6919	3.7841	4.0774	2.3211	4.44543	3.3942	-0.389252	0.702203
novel-m0036-5p	21	CCACGAATCACAGCACGAACT	75	11	14	16	9	12	13	1.2977	1.6643	1.7874	0.8733	1.529	1.5087	1.58313	1.30367	-0.280208	0.90969
novel-m0037-5p	21	AATTTCCAGTCCTGTTGGGCC	6	3	3	0	0	0	0	0.3539	0.3566	0	0	0	0	0.236833	0.01	-4.5658	0.300532
novel-m0038-3p	21	TACCTCTGCCAGACTACATGG	144	35	19	21	33	20	16	4.1289	2.2587	2.346	3.202	2.5484	1.8569	2.9112	2.53577	-0.199192	1
novel-m0039-3p	22	TCCGTTATAACCGAGGTTGACT	63	8	12	5	16	9	13	0.9437	1.4265	0.5586	1.5525	1.1468	1.5087	0.976267	1.40267	0.522825	0.370162
novel-m0040-5p	20	TCCCAGCGGCCGCGCGGTCT	6	2	0	2	2	0	0	0.2359	0	0.2234	0.1941	0	0	0.1531	0.0647	-1.24264	0.867338
novel-m0041-5p	21	CAGGATATGATGCTGTGTAGT	12	4	2	0	6	0	0	0.4719	0.2378	0	0.5822	0	0	0.236567	0.194067	-0.285694	1
novel-m0042-5p	22	TGAATCACTCTGTACATTCACT	10	2	0	0	2	3	3	0.2359	0	0	0.1941	0.3823	0.3482	0.0786333	0.3082	1.97065	0.349467
novel-m0043-3p	21	TGTTGTTCTCTGATAACATCA	95	20	17	18	14	14	12	2.3594	2.0209	2.0108	1.3584	1.7839	1.3927	2.13037	1.51167	-0.494962	0.627569
novel-m0043-5p	22	TGTTACGAGAGAACAACATGGT	116	16	15	27	7	23	28	1.8875	1.7832	3.0163	0.6792	2.9306	3.2495	2.229	2.28643	0.0367022	0.808976
novel-m0044-3p	20	TTAATGATGTTAGGCAGACT	6	0	0	0	4	0	2	0	0	0	0.3881	0	0.2321	0.01	0.206733	4.3697	0.290922
novel-m0045-5p	22	TGACACGACGGTCCTGCATGAC	30	3	6	8	2	7	4	0.3539	0.7133	0.8937	0.1941	0.8919	0.4642	0.653633	0.516733	-0.339062	0.914961
novel-m0046-3p	22	TACCTCTCTGCCAGACTACACG	839	139	138	152	148	125	137	16.3976	16.405	16.9804	14.3603	15.9272	15.8995	16.5943	15.3957	-0.108166	0.90315
novel-m0047-5p	21	AACAGTTGGATTCTGTTATCT	22	6	6	3	2	5	0	0.7078	0.7133	0.3351	0.1941	0.6371	0	0.5854	0.277067	-1.07919	0.421273
novel-m0048-5p	21	AACAGTTGGATTCTGTTATCT	22	6	6	3	2	5	0	0.7078	0.7133	0.3351	0.1941	0.6371	0	0.5854	0.277067	-1.07919	0.420965
novel-m0049-3p	22	CATGGCATCACATCTCAGAAGA	9	0	0	0	7	0	2	0	0	0	0.6792	0	0.2321	0.01	0.303767	4.92489	0.147221
novel-m0050-3p	24	TCCTGTCGGTCGCACTATGGCCCT	29	0	8	7	10	0	4	0	0.951	0.782	0.9703	0	0.4642	0.577667	0.478167	-0.272724	1
novel-m0050-5p	27	CAGGTCGCGGGTTCGATTGTCGGTGGT	6	0	2	2	2	0	0	0	0.2378	0.2234	0.1941	0	0	0.153733	0.0647	-1.24859	0.867361
novel-m0051-5p	22	TGCCGACGTTTCGGGACAACGT	7	0	2	3	0	0	2	0	0.2378	0.3351	0	0	0.2321	0.190967	0.0773667	-1.30354	0.754265
novel-m0052-5p	22	CCAGGCCTGTAGTGGGACTGCT	7	0	0	4	0	3	0	0	0	0.4469	0	0.3823	0	0.148967	0.127433	-0.225247	1
novel-m0053-3p	25	TGAAAATCGATTGGTAGTAGGCAGT	387	57	79	71	73	37	70	6.7242	9.3913	7.9316	7.0831	4.7145	8.1238	8.0157	6.64047	-0.271544	0.875308
novel-m0053-5p	22	TTCACTACTGGTTAGAGGTTCT	265	39	50	45	50	32	49	4.6008	5.9438	5.0271	4.8514	4.0774	5.6867	5.19057	4.87183	-0.0914273	0.886129
novel-m0054-3p	21	ATGTGACACCATGTAGTTTGG	467	66	94	55	98	64	90	7.7859	11.1744	6.1442	9.5088	8.1547	10.4449	8.36817	9.36947	0.163055	0.53095
novel-m0055-5p	23	TGACGACGCAGTGACGACGCACT	301	65	63	45	54	27	47	7.6679	7.4892	5.0271	5.2396	3.4403	5.4546	6.72807	4.7115	-0.514006	0.542615
novel-m0056-3p	22	TACCTCTCTGCCAGACTACACG	845	143	138	154	148	125	137	16.8695	16.405	17.2038	14.3603	15.9272	15.8995	16.8261	15.3957	-0.128176	0.939811
novel-m0057-5p	21	AAGGATTGCCACTCAACGCTG	42	13	14	3	9	0	3	1.5336	1.6643	0.3351	0.8733	0	0.3482	1.17767	0.407167	-1.53224	0.248234
novel-m0058-3p	21	AACTTCTGGACTCAACCAACT	8	6	2	0	0	0	0	0.7078	0.2378	0	0	0	0	0.3152	0.01	-4.9782	0.201076
novel-m0059-3p	22	TGACCCTTGAAGATGGGACTGG	9	0	3	2	0	4	0	0	0.3566	0.2234	0	0.5097	0	0.193333	0.1699	-0.186405	1
novel-m0060-3p	23	TTGTCGTTGCACTGGGTTGCACT	6	2	4	0	0	0	0	0.2359	0.4755	0	0	0	0	0.237133	0.01	-4.56763	0.305117
novel-m0061-5p	22	TGCCACTCAACTCAAGCACACA	15	2	2	0	3	2	6	0.2359	0.2378	0	0.2911	0.2548	0.6963	0.1579	0.414067	1.39085	0.296862
novel-m0062-3p	21	AAGGATTACCACTCGACGCTG	10	0	0	2	4	0	4	0	0	0.2234	0.3881	0	0.4642	0.0744667	0.2841	1.93173	0.457705
novel-m0063-3p	22	TAAAGGATTACCACTTGACGCT	30	5	11	0	0	9	5	0.5898	1.3076	0	0	1.1468	0.5803	0.632467	0.5757	-0.135672	1
novel-m0064-3p	23	TAGGATCGCCAACGTTGCGTAGT	9	0	0	2	5	2	0	0	0	0.2234	0.4851	0.2548	0	0.0744667	0.246633	1.7277	0.558299
novel-m0065-3p	23	TAGGATCGCCAACGTTGCGTAGT	9	0	0	2	5	2	0	0	0	0.2234	0.4851	0.2548	0	0.0744667	0.246633	1.7277	0.557523
novel-m0066-3p	22	TGTAACAGAAGTATCTCTGACA	6	0	0	0	2	0	4	0	0	0	0.1941	0	0.4642	0.01	0.219433	4.45571	0.284246
novel-m0067-3p	21	CCAGGTTCAGTCCTTATTGCC	928	132	152	138	208	138	160	15.5718	18.0693	15.4164	20.182	17.5837	18.5687	16.3525	18.7781	0.199542	0.425689
novel-m0067-5p	19	GGTAATAAGGACTGAACCT	704	131	108	106	129	112	118	15.4539	12.8387	11.8416	12.5167	14.2708	13.6944	13.3781	13.494	0.0124449	0.710462
novel-m0068-3p	21	CCAGGTTCAGTCCTTATTGCC	928	132	152	138	208	138	160	15.5718	18.0693	15.4164	20.182	17.5837	18.5687	16.3525	18.7781	0.199542	0.425564
novel-m0068-5p	19	GGTAATAAGGACTGAACCT	704	131	108	106	129	112	118	15.4539	12.8387	11.8416	12.5167	14.2708	13.6944	13.3781	13.494	0.0124449	0.710419
novel-m0069-3p	21	CCAGATTCAGTCTTTAGAACT	2006	280	354	362	369	290	351	33.0311	42.0823	40.4401	35.8037	36.9512	40.7351	38.5178	37.83	-0.0259958	0.748031
novel-m0069-5p	23	AGTAATAAAGACTGAACCTCAGG	47	9	3	7	9	8	11	1.0617	0.3566	0.782	0.8733	1.0193	1.2766	0.733433	1.0564	0.526418	0.424023
novel-m0070-3p	23	CCGAGCGCTTGCTGGGATCATGG	6	0	0	0	6	0	0	0	0	0	0.5822	0	0	0.01	0.194067	4.27848	0.470713
novel-m0071-5p	23	ACGGACTACTGCACAAAGTACTT	8	0	5	3	0	0	0	0	0.5944	0.3351	0	0	0	0.309833	0.01	-4.95342	0.198157
novel-m0072-3p	22	CTGGTAGCATTTGTACTGTGCT	22	0	7	2	5	3	5	0	0.8321	0.2234	0.4851	0.3823	0.5803	0.351833	0.482567	0.455836	0.740246
novel-m0073-3p	21	TTAGCTGCAGGCTTTGTTCTG	21	8	2	3	3	0	5	0.9437	0.2378	0.3351	0.2911	0	0.5803	0.505533	0.290467	-0.799434	0.651658
novel-m0074-5p	21	ATTAGTCATCGAGCTACATCC	10	2	0	0	4	2	2	0.2359	0	0	0.3881	0.2548	0.2321	0.0786333	0.291667	1.89111	0.353995
novel-m0075-5p	21	TTTCATTGTCACTTTGTCACT	355	59	45	57	87	65	42	6.9601	5.3495	6.3676	8.4415	8.2822	4.8743	6.22573	7.19933	0.20962	0.48425
novel-m0076-5p	22	CTTTGGATTATATGCACTTTGC	8	2	6	0	0	0	0	0.2359	0.7133	0	0	0	0	0.3164	0.01	-4.98368	0.196736
novel-m0077-3p	23	TAGGTACATATGTATTTGTGTGG	67	8	17	15	14	4	9	0.9437	2.0209	1.6757	1.3584	0.5097	1.0445	1.54677	0.970867	-0.67191	0.546419
novel-m0078-5p	24	TGCAGTTAAGCCAGCCTGTGCACT	74	9	14	23	10	4	14	1.0617	1.6643	2.5694	0.9703	0.5097	1.6248	1.76513	1.03493	-0.770239	0.482331
novel-m0079-3p	23	TGACGACGCAGTGACGACGCACT	301	65	63	45	54	27	47	7.6679	7.4892	5.0271	5.2396	3.4403	5.4546	6.72807	4.7115	-0.514006	0.54193
novel-m0080-3p	22	TTTGTTGGCGATTATTACTTTT	12	0	0	2	5	3	2	0	0	0.2234	0.4851	0.3823	0.2321	0.0744667	0.3665	2.29915	0.215694
novel-m0081-3p	22	AGCACTTGGAACGTTGGAGAAA	22	7	2	0	6	5	2	0.8258	0.2378	0	0.5822	0.6371	0.2321	0.354533	0.4838	0.448489	0.741178
novel-m0082-5p	24	AGACACCTGAACCCTGGCTGACAG	65	8	12	13	13	10	9	0.9437	1.4265	1.4523	1.2614	1.2742	1.0445	1.27417	1.19337	-0.0945166	0.947701
novel-m0083-5p	24	AGACACCTGAACCCTGGCTGACAG	65	8	12	13	13	10	9	0.9437	1.4265	1.4523	1.2614	1.2742	1.0445	1.27417	1.19337	-0.0945166	0.947583
novel-m0084-5p	22	TGAATCACTCTGTACATTCACT	10	2	0	0	2	3	3	0.2359	0	0	0.1941	0.3823	0.3482	0.0786333	0.3082	1.97065	0.349027
novel-m0085-3p	22	AGCAGCTGCCGAACACTGCTCT	15	7	3	0	2	0	3	0.8258	0.3566	0	0.1941	0	0.3482	0.394133	0.180767	-1.12456	0.622214
novel-m0086-3p	20	CTTCGAACAATGGCAGAACC	8	0	0	3	3	2	0	0	0	0.3351	0.2911	0.2548	0	0.1117	0.181967	0.704045	0.888542
novel-m0087-5p	23	TAATTACCATTCTGTGACTTACT	14	3	4	4	0	3	0	0.3539	0.4755	0.4469	0	0.3823	0	0.425433	0.127433	-1.73919	0.301247
novel-m0088-3p	22	TGGAGACAACAGGTTACTTTGG	15	0	5	3	2	5	0	0	0.5944	0.3351	0.1941	0.6371	0	0.309833	0.277067	-0.161259	1
novel-m0089-3p	21	TTTGAGTGACTGTTTATCCCT	420	62	70	73	74	53	88	7.314	8.3214	8.1551	7.1801	6.7531	10.2128	7.93017	8.04867	0.0213986	0.714159
novel-m0090-3p	22	TGCTTTAGAATATGCCATTAGG	6	0	0	4	2	0	0	0	0	0.4469	0.1941	0	0	0.148967	0.0647	-1.20315	0.916757
novel-m0091-5p	22	TGAATCGCTCTGTACATTCACT	8	0	0	4	2	2	0	0	0	0.4469	0.1941	0.2548	0	0.148967	0.149633	0.00644205	1
novel-m0092-5p	22	TTGCAAATGGCGATGATTGAGA	23	8	0	5	8	0	2	0.9437	0	0.5586	0.7762	0	0.2321	0.500767	0.3361	-0.575248	0.926531
novel-m0093-5p	24	AGACACCTGAACCCTGGTTGACAG	1195	183	254	222	192	110	234	21.5882	30.1947	24.8003	18.6296	14.016	27.1568	25.5277	19.9341	-0.356825	0.714134
novel-m0094-3p	22	CCTGACCATTGGAGATGGGACT	34	8	9	3	3	5	6	0.9437	1.0699	0.3351	0.2911	0.6371	0.6963	0.7829	0.5415	-0.531867	0.764445
novel-m0095-3p	22	TACCTCTCTGCCAGACTACACG	845	143	138	154	148	125	137	16.8695	16.405	17.2038	14.3603	15.9272	15.8995	16.8261	15.3957	-0.128176	0.939807
novel-m0096-3p	23	TATCCATTAACAGTAATGCTGAA	14332	2380	2185	2982	2293	2169	2323	280.765	259.745	333.128	222.487	276.369	269.595	291.213	256.15	-0.185082	0.965163
novel-m0096-5p	21	TTGGCATTGGCTGTTAATGGC	533	78	104	97	110	67	77	9.2015	12.3632	10.8362	10.6732	8.537	8.9362	10.8003	9.38213	-0.203083	0.954551
novel-m0097-3p	22	TTGACCTGAAGATGAAGGCACT	580	104	75	117	96	119	69	12.2687	8.9158	13.0704	9.3148	15.1627	8.0078	11.4183	10.8284	-0.0765233	0.880478
novel-m0098-5p	21	TGAGTGCTGTGTGTATTTACT	7	2	0	3	2	0	0	0.2359	0	0.3351	0.1941	0	0	0.190333	0.0647	-1.55669	0.753489
novel-m0099-5p	20	AGCTGAGTCTGAGCAGCTCT	114	17	19	17	22	11	28	2.0055	2.2587	1.8991	2.1346	1.4016	3.2495	2.05443	2.2619	0.138795	0.663365
novel-m0100-3p	20	TTAGGTTGGGTTAGGTTAGG	16	6	5	0	2	3	0	0.7078	0.5944	0	0.1941	0.3823	0	0.434067	0.192133	-1.17581	0.542114
novel-m0101-3p	20	AATATAGGTTGTATCAGACG	9	3	0	3	0	0	3	0.3539	0	0.3351	0	0	0.3482	0.229667	0.116067	-0.984588	0.784265
novel-m0101-5p	22	TGCGTCTGACACAACCTGTATT	253	32	49	41	57	35	39	3.775	5.825	4.5802	5.5306	4.4596	4.5261	4.72673	4.83877	0.0337959	0.721246
novel-m0102-5p	24	TGGGTTACGGGCCGCTGATTGGCT	35	2	7	9	8	5	4	0.2359	0.8321	1.0054	0.7762	0.6371	0.4642	0.691133	0.625833	-0.143186	1
novel-m0103-5p	24	TGTTGTCCTCCACTAATATGAATG	11	0	0	5	4	0	2	0	0	0.5586	0.3881	0	0.2321	0.1862	0.206733	0.150918	0.895182
novel-m0104-5p	24	TGTTGTCTTCCACTAATATGAATG	8	2	0	2	2	0	2	0.2359	0	0.2234	0.1941	0	0.2321	0.1531	0.142067	-0.107906	1
novel-m0105-3p	22	CATATTAGTGGAGGACAACACA	369	57	76	58	70	49	59	6.7242	9.0346	6.4794	6.792	6.2435	6.8472	7.41273	6.62757	-0.161526	1
novel-m0105-5p	22	TGTTGTCCTCTGCTAATATCGA	2089	392	324	351	373	335	314	46.2436	38.516	39.2113	36.1918	42.685	36.4411	41.3236	38.4393	-0.104385	0.896304
novel-m0106-3p	22	TGATATCACTGTGGTGTCCTCT	16351	3088	2343	3644	2194	2834	2248	364.286	278.528	407.082	212.881	361.102	260.891	349.966	278.291	-0.330616	0.691024
novel-m0106-5p	22	AGGACAACATGGCGATGTTACA	254	33	49	50	47	28	47	3.893	5.825	5.5857	4.5604	3.5677	5.4546	5.10123	4.52757	-0.17211	1
novel-m0107-5p	20	CAACTCAAACACACTGTTTC	6	0	0	2	0	2	2	0	0	0.2234	0	0.2548	0.2321	0.0744667	0.1623	1.124	0.865488
novel-m0108-5p	23	TGTGTGGTCTGGCAGAGAGGTAT	23	6	4	7	3	3	0	0.7078	0.4755	0.782	0.2911	0.3823	0	0.6551	0.224467	-1.54521	0.244131
novel-m0109-5p	22	AGCACTTGGAACGTTGGAGAAA	22	7	2	0	6	5	2	0.8258	0.2378	0	0.5822	0.6371	0.2321	0.354533	0.4838	0.448489	0.741715
novel-m0110-5p	21	TTCCTCCGCACTGGAAGACCT	30	5	4	8	4	5	4	0.5898	0.4755	0.8937	0.3881	0.6371	0.4642	0.653	0.496467	-0.395386	0.907459
novel-m0111-3p	23	TGCGAAGACACTTGGACTGGAGA	15	7	4	4	0	0	0	0.8258	0.4755	0.4469	0	0	0	0.582733	0.01	-5.86476	0.00982457
novel-m0112-3p	22	TGCAGTATGCTTCTCCAAAACT	16	2	6	2	2	0	4	0.2359	0.7133	0.2234	0.1941	0	0.4642	0.390867	0.219433	-0.832894	0.683185
novel-m0113-5p	22	AAACATGTAGTATATTGGCACA	261	44	60	35	43	36	43	5.1906	7.1326	3.91	4.1722	4.587	4.9903	5.41107	4.58317	-0.239568	0.903809
novel-m0114-3p	23	TTCCCTTCCTGTGTTGGAGAACT	17	0	0	3	8	4	2	0	0	0.3351	0.7762	0.5097	0.2321	0.1117	0.506	2.17951	0.173199
novel-m0115-3p	22	GATAAAATAAATAAAACTGACT	23	0	6	2	6	3	6	0	0.7133	0.2234	0.5822	0.3823	0.6963	0.312233	0.5536	0.826219	0.495139
novel-m0116-3p	20	TATTCCTATACATAGTGACT	29	8	5	8	2	2	4	0.9437	0.5944	0.8937	0.1941	0.2548	0.4642	0.8106	0.304367	-1.41318	0.233933
novel-m0117-3p	22	TCCGTTATAACCGAGGTTGACT	63	8	12	5	16	9	13	0.9437	1.4265	0.5586	1.5525	1.1468	1.5087	0.976267	1.40267	0.522825	0.369808
novel-m0118-3p	22	AACATGTAGCTGTTGACATTCT	113	12	14	30	27	15	15	1.4156	1.6643	3.3514	2.6198	1.9113	1.7408	2.14377	2.09063	-0.0362078	0.873204
novel-m0119-5p	22	TGAGCAAGTCAGTTGCGGAACT	6	4	0	2	0	0	0	0.4719	0	0.2234	0	0	0	0.231767	0.01	-4.5346	0.316222
novel-m0120-3p	23	TTGTTTCCGGCTTGGGACTGTCT	20	4	3	9	2	0	2	0.4719	0.3566	1.0054	0.1941	0	0.2321	0.6113	0.142067	-2.10531	0.163156
novel-m0121-5p	24	TAGACACAGTGTTGCGTAACACAC	10	2	2	2	0	2	2	0.2359	0.2378	0.2234	0	0.2548	0.2321	0.232367	0.1623	-0.51774	0.846886
novel-m0122-3p	22	AGGCGTGAACTCTCTGCGGTCC	21	4	2	5	5	0	5	0.4719	0.2378	0.5586	0.4851	0	0.5803	0.422767	0.355133	-0.251501	1
novel-m0123-3p	22	AGGCGTGAACTCTCTGCGGTCC	21	4	2	5	5	0	5	0.4719	0.2378	0.5586	0.4851	0	0.5803	0.422767	0.355133	-0.251501	1
novel-m0124-5p	21	AACAGTTGGATTCTGTTATCT	22	6	6	3	2	5	0	0.7078	0.7133	0.3351	0.1941	0.6371	0	0.5854	0.277067	-1.07919	0.42071
novel-m0125-5p	21	TGTGAATGTTTGTAGAATTCC	101	20	15	19	21	8	18	2.3594	1.7832	2.1225	2.0376	1.0193	2.089	2.08837	1.7153	-0.283914	0.894655
novel-m0126-3p	22	GGGTCGAGGCATGTAGGAGTGT	7	0	0	5	2	0	0	0	0	0.5586	0.1941	0	0	0.1862	0.0647	-1.52502	0.901145
novel-m0127-5p	20	CAACTCAAACACACTGTTTC	6	0	0	2	0	2	2	0	0	0.2234	0	0.2548	0.2321	0.0744667	0.1623	1.124	0.865503
novel-m0128-5p	23	CTGGGTCCAATGGGAAGAACTGT	61	13	14	9	6	6	13	1.5336	1.6643	1.0054	0.5822	0.7645	1.5087	1.4011	0.9518	-0.55783	0.610634
novel-m0129-5p	24	GGTGTTAACAGGGAGACGATTCGT	17	4	3	2	2	0	6	0.4719	0.3566	0.2234	0.1941	0	0.6963	0.350633	0.2968	-0.240472	1
novel-m0130-3p	22	CGCACCGAGATTTCAGATTCCT	273	46	45	49	48	37	48	5.4265	5.3495	5.4739	4.6574	4.7145	5.5706	5.41663	4.98083	-0.121009	0.951122
novel-m0131-3p	22	TACCCCATGTGTCGGTTGTACC	15	0	2	3	3	3	4	0	0.2378	0.3351	0.2911	0.3823	0.4642	0.190967	0.3792	0.989638	0.528307
novel-m0132-5p	22	ATCGTTACACTAAGGTTGCACT	14	3	2	0	3	4	2	0.3539	0.2378	0	0.2911	0.5097	0.2321	0.197233	0.3443	0.803763	0.633667
novel-m0133-5p	23	TACAGGGTGTAATCTGTGCGCTC	104	16	22	22	14	19	11	1.8875	2.6153	2.4577	1.3584	2.4209	1.2766	2.32017	1.6853	-0.461223	0.659951
novel-m0134-5p	20	GAGGGCTGGGCGGTCGGGCC	6	2	0	0	2	2	0	0.2359	0	0	0.1941	0.2548	0	0.0786333	0.149633	0.928219	0.864969
novel-m0135-3p	23	CTGGAACGTATTGAGGAGCTCTC	141	23	19	16	29	29	25	2.7133	2.2587	1.7874	2.8138	3.6951	2.9014	2.25313	3.13677	0.477346	0.294535
novel-m0136-3p	22	ATATTGGATACCAACTCAATTT	6	0	0	6	0	0	0	0	0	0.6703	0	0	0	0.223433	0.01	-4.48177	0.588528
novel-m0137-3p	22	ATATTGGATACCAACTCAATTT	6	0	0	6	0	0	0	0	0	0.6703	0	0	0	0.223433	0.01	-4.48177	0.593509
novel-m0138-3p	23	AGGTTTTGGAAGGGTGTTACTGG	20	2	6	2	5	3	2	0.2359	0.7133	0.2234	0.4851	0.3823	0.2321	0.390867	0.3665	-0.0928634	1
novel-m0138-5p	23	TTTTCACCCAATTAGAGTTTTGG	32	2	7	8	5	7	3	0.2359	0.8321	0.8937	0.4851	0.8919	0.3482	0.6539	0.575067	-0.185341	1
novel-m0139-5p	21	CCACGAATCACAGCACGAACT	75	11	14	16	9	12	13	1.2977	1.6643	1.7874	0.8733	1.529	1.5087	1.58313	1.30367	-0.280208	0.909781
novel-m0140-5p	22	CGATTGGTGGGCCCTTGGCATC	29	4	10	0	9	4	2	0.4719	1.1888	0	0.8733	0.5097	0.2321	0.553567	0.538367	-0.040168	1
novel-m0141-3p	21	ATTCACAACAAACTATCTAGT	491	55	69	105	99	79	84	6.4883	8.2025	11.7299	9.6059	10.066	9.7486	8.8069	9.80683	0.155153	0.517374
novel-m0142-5p	23	CAGTGGTGCATGCTGTGAAGACT	11	2	0	2	0	3	4	0.2359	0	0.2234	0	0.3823	0.4642	0.1531	0.282167	0.882073	0.670775
novel-m0143-5p	24	TAAGTTGCAGAGAGTGTGACTTCT	15	4	3	4	0	2	2	0.4719	0.3566	0.4469	0	0.2548	0.2321	0.425133	0.1623	-1.38925	0.33152
novel-m0144-3p	20	ATTACATGGAATGTGCTCCT	6	0	6	0	0	0	0	0	0.7133	0	0	0	0	0.237767	0.01	-4.57147	0.503272
novel-m0145-5p	22	ACTTTCCAGAAGGAATGTCACT	320	48	41	76	45	52	58	5.6625	4.8739	8.4902	4.3663	6.6257	6.7312	6.3422	5.90773	-0.102379	0.919582
novel-m0146-3p	22	TTGAAGTCGGGGAATGCTTGCT	9	0	4	5	0	0	0	0	0.4755	0.5586	0	0	0	0.3447	0.01	-5.10727	0.170571
novel-m0147-5p	22	CAGACTCCCACAGTATTTTGGC	6	2	0	4	0	0	0	0.2359	0	0.4469	0	0	0	0.2276	0.01	-4.50843	0.318299
novel-m0148-5p	22	TCACCACGGCATGGCGCGTCCT	7	0	0	5	0	2	0	0	0	0.5586	0	0.2548	0	0.1862	0.0849333	-1.13245	0.9045
novel-m0149-5p	21	ACTGACGTTAATGTGTTTACT	52	18	3	15	6	10	0	2.1234	0.3566	1.6757	0.5822	1.2742	0	1.38523	0.6188	-1.16258	0.364664
novel-m0150-5p	24	TGGGACAGCTCTGTGGTGCCGAGC	100	16	19	18	15	18	14	1.8875	2.2587	2.0108	1.4554	2.2935	1.6248	2.05233	1.79123	-0.196312	0.963311
novel-m0151-3p	22	TTTGAAATGGTGTTTGAGTGAA	138	24	17	36	21	16	24	2.8312	2.0209	4.0217	2.0376	2.0387	2.7853	2.95793	2.2872	-0.371007	0.783364
novel-m0152-5p	22	TTCGTCGGTTTTACAATCCAGA	10	2	0	2	3	3	0	0.2359	0	0.2234	0.2911	0.3823	0	0.1531	0.224467	0.552027	0.871956
novel-m0153-3p	22	CAGTATACTCGATGTGCGATCT	25	5	5	3	5	5	2	0.5898	0.5944	0.3351	0.4851	0.6371	0.2321	0.506433	0.451433	-0.165859	1
novel-m0154-5p	24	TGCGGATGAGGAGCGACGCGTGAG	10	0	2	2	2	2	2	0	0.2378	0.2234	0.1941	0.2548	0.2321	0.153733	0.227	0.562262	0.84606
novel-m0155-3p	22	AGGCGTGAACTCTCTGCGGTCC	21	4	2	5	5	0	5	0.4719	0.2378	0.5586	0.4851	0	0.5803	0.422767	0.355133	-0.251501	1
novel-m0156-3p	22	TCTGGGATGTGACGCCGTGTCT	19	5	2	4	2	6	0	0.5898	0.2378	0.4469	0.1941	0.7645	0	0.424833	0.319533	-0.410931	1
novel-m0157-5p	23	TACGGAAGAACATGGCCGCCTCT	32	8	5	5	6	6	2	0.9437	0.5944	0.5586	0.5822	0.7645	0.2321	0.6989	0.526267	-0.409292	0.914808
novel-m0158-5p	20	CGCGAGGTCCGGACTGTACG	8	0	3	3	0	2	0	0	0.3566	0.3351	0	0.2548	0	0.230567	0.0849333	-1.44078	0.655609
novel-m0159-3p	22	AGATGGGACTGATCCGTTGTCC	6	0	2	2	0	0	2	0	0.2378	0.2234	0	0	0.2321	0.153733	0.0773667	-0.990646	0.868957
novel-m0160-5p	21	ATTCCCAATTTATTAAAAATT	12	5	0	0	0	4	3	0.5898	0	0	0	0.5097	0.3482	0.1966	0.285967	0.540584	0.829745
novel-m0161-3p	20	TGGATGATCTTACTCTTTTC	69	10	15	9	13	13	9	1.1797	1.7832	1.0054	1.2614	1.6564	1.0445	1.32277	1.32077	-0.00218298	0.904187
novel-m0162-3p	20	ATTTCGCCACTGTGGGCGCC	47	30	12	0	0	5	0	3.5391	1.4265	0	0	0.6371	0	1.6552	0.212367	-2.96238	0.0749564
novel-m0163-3p	22	AACACAAGAGTCACATCCCTGA	59	12	8	5	7	18	9	1.4156	0.951	0.5586	0.6792	2.2935	1.0445	0.975067	1.33907	0.457655	0.498625
novel-m0163-5p	21	AGGGATATGACACTGTGTTGT	211	39	43	40	41	30	18	4.6008	5.1117	4.4685	3.9782	3.8225	2.089	4.727	3.29657	-0.519961	0.553717
novel-m0164-3p	22	TCCATAGTTGTGGTTGATAACG	12	2	3	0	2	3	2	0.2359	0.3566	0	0.1941	0.3823	0.2321	0.1975	0.2695	0.448433	0.863335
novel-m0165-3p	22	ACAGGTAAATGGATACTCTCCA	12254	1957	1859	2421	2097	2011	1909	230.864	220.992	270.457	203.47	256.237	221.548	240.771	227.085	-0.084429	0.842288
novel-m0166-5p	22	CTGTTGCTTGATTTGCGGCTGT	77	17	12	26	8	9	5	2.0055	1.4265	2.9045	0.7762	1.1468	0.5803	2.11217	0.834433	-1.33985	0.111899
novel-m0167-5p	23	TCACATGCTATCTGGACTGTGCT	28	3	0	11	0	12	2	0.3539	0	1.2288	0	1.529	0.2321	0.527567	0.587033	0.154089	0.88971
novel-m0168-3p	22	ATGGCAACAGCAGGTTCTTCGA	11	2	3	4	2	0	0	0.2359	0.3566	0.4469	0.1941	0	0	0.346467	0.0647	-2.42088	0.280176
novel-m0169-3p	21	TACACGAAGTCGTCGCACCTG	161	32	32	20	32	25	20	3.775	3.8041	2.2343	3.1049	3.1854	2.3211	3.27113	2.87047	-0.188505	1
novel-m0170-3p	22	TTGACACAGAAATAATTTTTAT	403	63	46	81	90	62	61	7.432	5.4683	9.0488	8.7326	7.8999	7.0793	7.31637	7.90393	0.111443	0.580167
novel-m0171-3p	22	TTTCTGTTCAGACACTGAAGGA	957	190	144	236	131	127	129	22.414	17.1182	26.3643	12.7108	16.1821	14.971	21.9655	14.6213	-0.587168	0.37071
novel-m0171-5p	21	CTGAGATGCCTGTAATAGAGA	74	5	22	11	9	7	20	0.5898	2.6153	1.2288	0.8733	0.8919	2.3211	1.47797	1.3621	-0.117781	1
novel-m0172-5p	22	TTACAACATGATTTCGACCTGT	8	0	4	2	0	0	2	0	0.4755	0.2234	0	0	0.2321	0.232967	0.0773667	-1.59034	0.657453
novel-m0173-5p	22	CTGGTAGCATTTGTACTGTGCT	22	0	7	2	5	3	5	0	0.8321	0.2234	0.4851	0.3823	0.5803	0.351833	0.482567	0.455836	0.738211
novel-m0174-3p	21	TTAGCAATGCAAGCGGAGGGT	11	2	0	6	0	3	0	0.2359	0	0.6703	0	0.3823	0	0.302067	0.127433	-1.24512	0.684941
novel-m0175-3p	21	TGGACGCAGCAGAAAGCCCTG	7	0	3	0	2	2	0	0	0.3566	0	0.1941	0.2548	0	0.118867	0.149633	0.332087	1
novel-m0176-3p	22	TTTCTGTTGGTGATATCTGACA	8	3	0	2	0	0	3	0.3539	0	0.2234	0	0	0.3482	0.192433	0.116067	-0.729405	0.888173
novel-m0177-3p	22	TTCTGAGGAGATATCTGCTTCT	746	115	147	149	123	99	113	13.5664	17.4749	16.6452	11.9346	12.6144	13.1142	15.8955	12.5544	-0.340425	0.716998
novel-m0177-5p	21	TGTCAGATATCACCAACAGAA	17	4	5	2	4	0	2	0.4719	0.5944	0.2234	0.3881	0	0.2321	0.4299	0.206733	-1.05623	0.580895
novel-m0178-5p	22	TTTCGGGACAACCTATTGGTCC	12	0	0	2	6	2	2	0	0	0.2234	0.5822	0.2548	0.2321	0.0744667	0.356367	2.2587	0.23138
novel-m0179-5p	22	TTATCTGTGCAACTTGCATCCT	14	5	2	3	4	0	0	0.5898	0.2378	0.3351	0.3881	0	0	0.387567	0.129367	-1.58298	0.496393
novel-m0180-5p	21	TGTGCTGCCGTCGGCTGTACA	13	2	3	4	2	0	2	0.2359	0.3566	0.4469	0.1941	0	0.2321	0.346467	0.142067	-1.28615	0.496142
novel-m0181-5p	24	AAAGACGGTAACACGCGAGTGATC	22	2	5	4	9	2	0	0.2359	0.5944	0.4469	0.8733	0.2548	0	0.425733	0.376033	-0.179089	1
novel-m0182-3p	23	TGATTGGGTGAAAATGACGTACT	18	2	2	6	4	2	2	0.2359	0.2378	0.6703	0.3881	0.2548	0.2321	0.381333	0.291667	-0.386732	1
novel-m0183-3p	24	TTGGTGTAATGTTTGTAATTCAGC	35	3	11	8	8	2	3	0.3539	1.3076	0.8937	0.7762	0.2548	0.3482	0.851733	0.459733	-0.889605	0.498122
novel-m0184-3p	24	TTATACCTAGGCTGATCTGACGAT	105	22	7	19	16	17	24	2.5953	0.8321	2.1225	1.5525	2.1661	2.7853	1.84997	2.16797	0.228843	0.600902
novel-m0185-3p	21	ACAGCTGAGTGTGAGGTCTGC	8	0	3	0	2	3	0	0	0.3566	0	0.1941	0.3823	0	0.118867	0.192133	0.692764	0.886525
novel-m0186-5p	22	CGATTGGTGGGCCCTTGGCATC	29	4	10	0	9	4	2	0.4719	1.1888	0	0.8733	0.5097	0.2321	0.553567	0.538367	-0.040168	1
novel-m0187-5p	22	TGAGAAGCTTCACTGACTGACT	13	0	6	0	3	2	2	0	0.7133	0	0.2911	0.2548	0.2321	0.237767	0.259333	0.125261	1
novel-m0188-3p	22	CTTGACCCTGAAGATGGAGGCA	25	0	8	7	0	6	4	0	0.951	0.782	0	0.7645	0.4642	0.577667	0.409567	-0.496139	0.862268
novel-m0189-3p	22	TACCGACATTTTGGAACAACCT	20	4	7	5	0	4	0	0.4719	0.8321	0.5586	0	0.5097	0	0.620867	0.1699	-1.8696	0.29382
novel-m0190-3p	22	AATGTTGGAAGAATTCTACACT	9	4	0	0	0	0	5	0.4719	0	0	0	0	0.5803	0.1573	0.193433	0.298318	1
novel-m0190-5p	21	AAATTCTCCCACTGTTTCTGG	11	3	0	0	5	3	0	0.3539	0	0	0.4851	0.3823	0	0.117967	0.289133	1.29336	0.599983
novel-m0191-5p	22	TGTTTTCTGTATACCTTGTGCT	14	2	0	2	3	7	0	0.2359	0	0.2234	0.2911	0.8919	0	0.1531	0.394333	1.36494	0.45786
novel-m0192-3p	22	TCTAGGATGATCTGTGCTAACA	6	0	2	0	0	2	2	0	0.2378	0	0	0.2548	0.2321	0.0792667	0.1623	1.03388	0.867751
novel-m0193-3p	22	TACCCTTCCCCTAGACCTGACC	6	0	3	0	0	3	0	0	0.3566	0	0	0.3823	0	0.118867	0.127433	0.100398	1
novel-m0193-5p	21	TCAGTTCTAGCAGAAGGGTAC	6	0	0	3	0	0	3	0	0	0.3351	0	0	0.3482	0.1117	0.116067	0.0553245	1
novel-m0194-5p	22	TACATGAGAATAAAACACAACT	8	4	0	0	0	0	4	0.4719	0	0	0	0	0.4642	0.1573	0.154733	-0.0237346	1
novel-m0195-3p	20	GGCAGTTTGGCTGGGGCGGC	12	0	0	0	0	12	0	0	0	0	0	1.529	0	0.01	0.509667	5.67148	0.133595
novel-m0195-5p	20	CCCTGAGACGAATTATGCTT	152	0	0	0	0	152	0	0	0	0	0	19.3675	0	0.01	6.45583	9.33446	0.000626501
novel-m0196-3p	22	TTGTATTTGACGGTTGATTATT	27	4	4	0	8	9	2	0.4719	0.4755	0	0.7762	1.1468	0.2321	0.3158	0.718367	1.18571	0.270048
novel-m0196-5p	23	AATCAACTGTCAAACATGGCTGT	37	8	2	11	8	5	3	0.9437	0.2378	1.2288	0.7762	0.6371	0.3482	0.803433	0.587167	-0.452408	0.78129
novel-m0197-5p	21	TACTGAACTTGCATGCTAGTT	8	2	0	0	0	4	2	0.2359	0	0	0	0.5097	0.2321	0.0786333	0.247267	1.65285	0.579135
novel-m0198-3p	22	TTACCCTACGATGCAGTGGCCT	6	0	0	0	0	4	2	0	0	0	0	0.5097	0.2321	0.01	0.247267	4.628	0.264805
novel-m0199-5p	20	GGATGTCATGCTGTGTCACT	41	10	8	5	7	4	7	1.1797	0.951	0.5586	0.6792	0.5097	0.8124	0.896433	0.6671	-0.426293	0.853589
novel-m0200-3p	22	TCCACACCTAAATGGACGCTCT	14705	2584	2364	2858	2337	2317	2245	304.83	281.024	319.276	226.757	295.227	260.543	301.71	260.842	-0.209987	0.910258
novel-m0200-5p	22	AGGGCATCCATTTACCTGTGGA	6831	1172	1144	1209	1394	916	996	138.259	135.995	135.061	135.258	116.715	115.59	136.438	122.521	-0.155218	0.97408
novel-m0201-3p	22	CACAGTTAAACGGATGCTCTCC	1726	310	259	294	309	306	248	36.5702	30.7891	32.8436	29.9819	38.9899	28.7815	33.401	32.5844	-0.035707	0.782205
novel-m0201-5p	22	AGGGCATCCATTTATCTTTGGG	61	18	13	5	13	6	6	2.1234	1.5454	0.5586	1.2614	0.7645	0.6963	1.40913	0.9074	-0.634998	0.580119
novel-m0202-3p	22	ACAAGTAAACGGACGCTCTCCA	18941	2814	2688	2958	4995	2336	3150	331.963	319.541	330.447	484.659	297.648	365.572	327.317	382.626	0.225249	0.349271
novel-m0202-5p	22	GAGGGCGTCTGTTTACCTGTGG	220	24	36	43	53	33	31	2.8312	4.2796	4.8037	5.1425	4.2048	3.5977	3.9715	4.315	0.119677	0.617836
novel-m0203-3p	21	CCACATGTAAATGGACGCTCT	3025	489	512	546	584	422	472	57.6865	60.8649	60.9953	56.6649	53.7703	54.7777	59.8489	55.071	-0.120033	0.913873
novel-m0203-5p	22	TGTCCATTTACCTGTAAGGTGT	68	7	8	22	9	12	10	0.8258	0.951	2.4577	0.8733	1.529	1.1605	1.4115	1.1876	-0.24918	0.954575
novel-m0204-3p	21	TATACACATGTGCATTTGCTG	117	12	24	20	20	17	24	1.4156	2.853	2.2343	1.9406	2.1661	2.7853	2.16763	2.29733	0.0838395	0.72477
novel-m0205-3p	21	GAAGGCACTGTGATCCTTTGA	9	0	0	2	0	2	5	0	0	0.2234	0	0.2548	0.5803	0.0744667	0.278367	1.90232	0.490933
novel-m0206-3p	22	ACATTCCAACACTTTGTCTTGT	26	3	2	0	14	4	3	0.3539	0.2378	0	1.3584	0.5097	0.3482	0.197233	0.738767	1.90522	0.0939353
novel-m0207-5p	22	TGGGCCCTGGGAGTTATGATGT	18	5	0	3	4	4	2	0.5898	0	0.3351	0.3881	0.5097	0.2321	0.3083	0.376633	0.288826	0.896756
novel-m0208-3p	21	TCTGAACGGTCTGCTTCAACT	15	8	7	0	0	0	0	0.9437	0.8321	0	0	0	0	0.591933	0.01	-5.88736	0.0329747
novel-m0209-3p	20	GGAATAGTACTGAGACAGTG	9	0	3	3	0	3	0	0	0.3566	0.3351	0	0.3823	0	0.230567	0.127433	-0.855441	0.782981
novel-m0210-3p	22	TCTGGGATGTGGTGCTGTGTAG	16	9	2	0	0	0	5	1.0617	0.2378	0	0	0	0.5803	0.433167	0.193433	-1.16309	0.628131
novel-m0211-3p	23	CAAAACACAGGACACCAATCACC	35	6	7	3	4	3	12	0.7078	0.8321	0.3351	0.3881	0.3823	1.3927	0.625	0.721033	0.20621	0.787334
novel-m0211-5p	22	TGATTGGTACCTGACGTTCAGA	344	59	61	69	51	49	55	6.9601	7.2515	7.7082	4.9485	6.2435	6.383	7.3066	5.85833	-0.31871	0.765704
novel-m0212-3p	22	TGAACTTGTAAGTACAAAGACT	10	0	5	3	0	0	2	0	0.5944	0.3351	0	0	0.2321	0.309833	0.0773667	-2.00171	0.471535
novel-m0213-3p	22	TGAACTTGTAAGTACAAAGACT	10	0	5	3	0	0	2	0	0.5944	0.3351	0	0	0.2321	0.309833	0.0773667	-2.00171	0.47229
novel-m0214-3p	20	AACTTGTAAGTACAAGGACT	7	3	0	2	0	0	2	0.3539	0	0.2234	0	0	0.2321	0.192433	0.0773667	-1.31457	0.753505
novel-m0215-5p	22	TCTAGGATGTGATGCTGTGTCA	10	6	0	2	2	0	0	0.7078	0	0.2234	0.1941	0	0	0.3104	0.0647	-2.26229	0.480466
novel-m0216-5p	23	CTCAGGGGAACAAATAGAACACT	108	11	15	23	16	20	23	1.2977	1.7832	2.5694	1.5525	2.5484	2.6693	1.88343	2.25673	0.260871	0.529932
novel-m0217-3p	22	TCAACACTGTGTACTATCTCAG	657	76	90	102	125	135	129	8.9656	10.6989	11.3947	12.1286	17.2014	14.971	10.3531	14.767	0.512319	0.154529
novel-m0218-3p	22	TCATGTTGAGCTTGTTGGTACA	36	8	4	3	8	2	11	0.9437	0.4755	0.3351	0.7762	0.2548	1.2766	0.584767	0.7692	0.395498	0.595957
novel-m0218-5p	22	TACGGATAAGCTGAACACAACT	10	0	4	2	2	2	0	0	0.4755	0.2234	0.1941	0.2548	0	0.232967	0.149633	-0.638692	0.874848
novel-m0219-3p	21	TACTATGCAGCGTCGTGTGGT	151	28	22	30	20	30	21	3.3031	2.6153	3.3514	1.9406	3.8225	2.4371	3.08993	2.7334	-0.176879	1
novel-m0220-3p	22	AACGCCTGTATTGTTTGCTGAT	23	6	3	0	3	6	5	0.7078	0.3566	0	0.2911	0.7645	0.5803	0.3548	0.5453	0.620044	0.583374
novel-m0221-3p	21	ACGAGACACATCAACTCATGG	9	4	3	0	0	0	2	0.4719	0.3566	0	0	0	0.2321	0.276167	0.0773667	-1.83576	0.552881
novel-m0222-5p	21	TGAGTAGTTTCTGATGTTTCA	16	6	2	4	0	2	2	0.7078	0.2378	0.4469	0	0.2548	0.2321	0.464167	0.1623	-1.51598	0.292334
novel-m0223-5p	22	ACACATGTGAAATAAGCACCAG	9	2	2	0	0	0	5	0.2359	0.2378	0	0	0	0.5803	0.1579	0.193433	0.292825	1
novel-m0224-3p	22	AGCAACCGAGATTCAGCCCCGC	16	3	0	2	5	4	2	0.3539	0	0.2234	0.4851	0.5097	0.2321	0.192433	0.408967	1.08762	0.453666
novel-m0225-3p	24	CCGGATCCAAGCGCCATTGCACTT	8	4	2	0	0	0	2	0.4719	0.2378	0	0	0	0.2321	0.236567	0.0773667	-1.61246	0.654397
novel-m0226-3p	22	CAAATATTGGAAACTGGTTACC	25	9	4	6	3	3	0	1.0617	0.4755	0.6703	0.2911	0.3823	0	0.735833	0.224467	-1.71288	0.179327
novel-m0227-3p	22	TGGCCCACACTCACATTACTAG	909	163	147	173	179	125	122	19.2288	17.4749	19.3264	17.3682	15.9272	14.1587	18.6767	15.818	-0.239669	0.883112
novel-m0227-5p	22	TGTGATGTGCTTGTGGGCTTTC	344	66	63	59	80	35	41	7.7859	7.4892	6.5911	7.7623	4.4596	4.7582	7.28873	5.66003	-0.364858	0.725713
novel-m0228-5p	23	TGTGGGACTGGCAGCAGATATGT	176	26	36	39	36	13	26	3.0672	4.2796	4.3568	3.493	1.6564	3.0174	3.9012	2.72227	-0.51911	0.591399
novel-m0229-3p	24	TCCCCGGCGTTTGTTTTGAATAGC	7	0	2	0	3	0	2	0	0.2378	0	0.2911	0	0.2321	0.0792667	0.1744	1.13761	0.746888
novel-m0230-3p	20	TTGATGAACTGTATGTCACT	7	3	4	0	0	0	0	0.3539	0.4755	0	0	0	0	0.276467	0.01	-4.78903	0.231884
novel-m0231-3p	22	CGTCGTCGTAGGTGTCGTCGTC	11627	2037	1542	2886	1672	1996	1494	240.302	183.308	322.404	162.232	254.326	173.386	248.671	196.648	-0.338623	0.693529
novel-m0231-5p	22	CGGCGGCAGCAGCGGCGACGAC	252	24	24	55	48	51	50	2.8312	2.853	6.1442	4.6574	6.4983	5.8027	3.9428	5.6528	0.519745	0.240646
novel-m0232-3p	22	CGTCGTCGTAGGTGTCGTCGTC	11627	2037	1542	2886	1672	1996	1494	240.302	183.308	322.404	162.232	254.326	173.386	248.671	196.648	-0.338623	0.693109
novel-m0232-5p	22	CGGCGGCAGCAGCGGCGACGAC	252	24	24	55	48	51	50	2.8312	2.853	6.1442	4.6574	6.4983	5.8027	3.9428	5.6528	0.519745	0.240882
novel-m0233-3p	23	ATGCCATGGTGGCAGCCCTGAAT	9	3	2	0	2	0	2	0.3539	0.2378	0	0.1941	0	0.2321	0.197233	0.142067	-0.473335	1
novel-m0234-5p	22	ATCTTCAAGGGTCAAGAAGTCT	49	7	9	6	10	9	8	0.8258	1.0699	0.6703	0.9703	1.1468	0.9284	0.855333	1.01517	0.247158	0.625472
novel-m0235-3p	21	TTGTTGCATATCTCCTTGAAG	25	6	5	2	4	2	6	0.7078	0.5944	0.2234	0.3881	0.2548	0.6963	0.508533	0.4464	-0.188005	1
novel-m0235-5p	22	TTCAGGGAGGTATTCAACAAAG	77	14	15	9	21	8	10	1.6516	1.7832	1.0054	2.0376	1.0193	1.1605	1.48007	1.4058	-0.0742708	0.956906
novel-m0236-3p	22	TAGGCAGCAGATTCCTCTGAAA	93	21	15	27	6	11	13	2.4773	1.7832	3.0163	0.5822	1.4016	1.5087	2.4256	1.16417	-1.05904	0.202786
novel-m0237-5p	23	TTAACTTGACATTCGGCAGTGAG	168	15	29	27	36	26	35	1.7695	3.4474	3.0163	3.493	3.3129	4.0619	2.7444	3.6226	0.400535	0.346149
novel-m0238-3p	21	TTGTTACCAGTAATGAAGAAC	60	6	14	9	11	13	7	0.7078	1.6643	1.0054	1.0673	1.6564	0.8124	1.12583	1.1787	0.0662033	0.845998
novel-m0239-3p	21	CCCACCAAGGCTCTGATGGGT	6	0	0	0	0	6	0	0	0	0	0	0.7645	0	0.01	0.254833	4.67148	0.413917
novel-m0240-3p	21	CCGGTTACCCGTGGTTAGACG	6	0	0	0	0	6	0	0	0	0	0	0.7645	0	0.01	0.254833	4.67148	0.417871
novel-m0241-3p	24	ACGGAGGTGCGCGAAGGTCTCCTC	8	0	0	0	0	8	0	0	0	0	0	1.0193	0	0.01	0.339767	5.08647	0.279799
novel-m0242-5p	20	GGTGGTGCGTGGGTTGACCT	10	0	0	0	0	10	0	0	0	0	0	1.2742	0	0.01	0.424733	5.40849	0.180589
novel-m0243-5p	21	GGACAGTATGCGGCGTTGTGT	9	2	0	3	0	4	0	0.2359	0	0.3351	0	0.5097	0	0.190333	0.1699	-0.163842	1
novel-m0244-5p	23	TTAGCTGTGGGGTGGACATCAGT	20	2	0	3	6	4	5	0.2359	0	0.3351	0.5822	0.5097	0.5803	0.190333	0.5574	1.55018	0.211763
novel-m0245-5p	22	CTTCTGGGATATGACGCTGTGT	24	3	0	2	12	0	7	0.3539	0	0.2234	1.1643	0	0.8124	0.192433	0.6589	1.7757	0.205418
novel-m0246-3p	23	AGCACGCCTGCAGTCCGGAACGT	31	4	7	6	3	3	8	0.4719	0.8321	0.6703	0.2911	0.3823	0.9284	0.6581	0.533933	-0.301647	1
novel-m0246-5p	23	TTCGAACTGAAGGCAGGGCTCCT	128	19	22	29	18	26	14	2.2414	2.6153	3.2397	1.7465	3.3129	1.6248	2.6988	2.22807	-0.276526	0.855096
novel-m0247-3p	22	ATGGACTCTCAGGCCATCCCGA	63	10	8	13	13	6	13	1.1797	0.951	1.4523	1.2614	0.7645	1.5087	1.19433	1.1782	-0.0196211	0.844669
novel-m0248-3p	22	CTTGACCCTGAAGATGGAGGCA	40	0	8	10	7	6	9	0	0.951	1.1171	0.6792	0.7645	1.0445	0.689367	0.8294	0.266797	0.700098
novel-m0249-5p	22	TATTGTGCAGTTTTGAATGGTA	7	0	0	2	5	0	0	0	0	0.2234	0.4851	0	0	0.0744667	0.1617	1.11865	0.81906
novel-m0250-3p	21	ACTGTCTCGACTGCTGAGATC	101	32	30	4	13	16	6	3.775	3.5663	0.4469	1.2614	2.0387	0.6963	2.59607	1.33213	-0.962589	0.343422
novel-m0251-5p	22	AGCGACTGCTTGGTTTCTCAGG	16	3	3	2	4	4	0	0.3539	0.3566	0.2234	0.3881	0.5097	0	0.3113	0.299267	-0.056874	1
novel-m0252-5p	21	TTCCTGCCACCTCTATCATCA	46	0	9	14	4	10	9	0	1.0699	1.564	0.3881	1.2742	1.0445	0.877967	0.902267	0.0393877	0.902817
novel-m0253-3p	22	AGGTATTGTGTCAGACTGTGCT	9	2	2	5	0	0	0	0.2359	0.2378	0.5586	0	0	0	0.3441	0.01	-5.10476	0.0902481
novel-m0254-5p	24	GGTGGTGGTGGTGGCGGTGGTGGC	6	0	0	6	0	0	0	0	0	0.6703	0	0	0	0.223433	0.01	-4.48177	0.586128
novel-m0255-3p	20	TCCTTGGATTGCTTGATCCT	90	16	18	14	14	19	9	1.8875	2.1398	1.564	1.3584	2.4209	1.0445	1.86377	1.60793	-0.213014	0.961785
novel-m0256-3p	22	CTTTCATGGGACTGACCGTGAC	23	8	15	0	0	0	0	0.9437	1.7832	0	0	0	0	0.908967	0.01	-6.50616	0.00711463
novel-m0257-3p	22	TTCTGCTAGACATTACCTCTGG	15	3	2	6	0	0	4	0.3539	0.2378	0.6703	0	0	0.4642	0.420667	0.154733	-1.44289	0.491666
novel-m0258-5p	20	GCTTCGTTGACTTGCGCGCC	7	0	2	0	3	0	2	0	0.2378	0	0.2911	0	0.2321	0.0792667	0.1744	1.13761	0.747242
novel-m0259-3p	22	TTTACCGATGTTTCAGGACAAC	34	3	3	8	7	4	9	0.3539	0.3566	0.8937	0.6792	0.5097	1.0445	0.534733	0.744467	0.477388	0.472922
novel-m0260-5p	21	TGGGATGTGACACTGTGTTGT	51	10	7	5	14	5	10	1.1797	0.8321	0.5586	1.3584	0.6371	1.1605	0.8568	1.052	0.296104	0.554841
novel-m0261-3p	21	CTGTTCCACTAGACCTAACCT	6	2	2	0	0	0	2	0.2359	0.2378	0	0	0	0.2321	0.1579	0.0773667	-1.02923	0.866232
novel-m0262-5p	22	AAACATGTAGTATATTGGCACA	261	44	60	35	43	36	43	5.1906	7.1326	3.91	4.1722	4.587	4.9903	5.41107	4.58317	-0.239568	0.903746
novel-m0263-3p	22	CTGGCATTATTGGCGGCTCACC	6	0	0	0	2	2	2	0	0	0	0.1941	0.2548	0.2321	0.01	0.227	4.50462	0.159577
novel-m0264-3p	20	TTGACCCCTGAAGATGCGAC	7	3	0	0	4	0	0	0.3539	0	0	0.3881	0	0	0.117967	0.129367	0.133087	1
novel-m0265-5p	22	TTTTGAGAACCATCTCTGTTCT	9	2	0	3	0	4	0	0.2359	0	0.3351	0	0.5097	0	0.190333	0.1699	-0.163842	1
novel-m0266-3p	23	TCTCTTTATAAGAACTCTTGACA	207	34	35	45	32	29	32	4.0109	4.1607	5.0271	3.1049	3.6951	3.7137	4.39957	3.50457	-0.328125	0.776141
novel-m0266-5p	20	TGGAAGTTCTGTTAAGGAGG	462	69	69	72	98	71	83	8.1398	8.2025	8.0433	9.5088	9.0467	9.6325	8.12853	9.396	0.209052	0.444333
novel-m0267-5p	22	TTCGACACTGTAAGCTATTCAG	135	19	28	17	17	21	33	2.2414	3.3285	1.8991	1.6495	2.6758	3.8298	2.48967	2.71837	0.126787	0.690883
novel-m0268-3p	24	TGACTAGATTTACACTCATCCATC	83	11	13	18	17	5	19	1.2977	1.5454	2.0108	1.6495	0.6371	2.205	1.61797	1.4972	-0.111915	0.96073
novel-m0268-5p	22	GATGAGTGGATTCTAGTGCATG	467	69	53	84	97	78	86	8.1398	6.3005	9.3839	9.4118	9.9386	9.9807	7.9414	9.77703	0.300003	0.347673
novel-m0269-3p	22	TACCGACGTTTCAGGACAACGT	12	2	8	0	2	0	0	0.2359	0.951	0	0.1941	0	0	0.395633	0.0647	-2.61233	0.356098
novel-m0269-5p	19	TTCTGGGATGTTATGCAGC	15	0	2	5	4	4	0	0	0.2378	0.5586	0.3881	0.5097	0	0.265467	0.299267	0.172901	0.897421
novel-m0270-5p	21	GGGATATGATGCTGTGTCACT	14	0	4	3	0	0	7	0	0.4755	0.3351	0	0	0.8124	0.2702	0.2708	0.00320006	1
novel-m0271-5p	21	ATGTACAGACAGTATGAATGC	145	30	16	36	23	24	16	3.5391	1.902	4.0217	2.2317	3.058	1.8569	3.15427	2.3822	-0.40501	0.714645
novel-m0272-3p	22	CAACGGTAGAGGAGTTCCTCGG	1096	70	65	95	323	333	210	8.2578	7.727	10.6127	31.3403	42.4302	24.3715	8.86583	32.714	1.88358	3.48e-05
novel-m0273-5p	24	AGACACCTGAACCCTGGTTGACAG	1195	183	254	222	192	110	234	21.5882	30.1947	24.8003	18.6296	14.016	27.1568	25.5277	19.9341	-0.356825	0.713246
novel-m0274-3p	22	TTCTGAATAACAACAGTGCATT	39	8	0	4	3	8	16	0.9437	0	0.4469	0.2911	1.0193	1.8569	0.463533	1.05577	1.18755	0.213434
novel-m0275-5p	22	TCTGCATATGGAGTTAACCTTG	9	0	2	2	2	3	0	0	0.2378	0.2234	0.1941	0.3823	0	0.153733	0.192133	0.321678	1
novel-m0276-3p	22	ACACGACATCGCATATCTCAGA	8	3	3	0	0	0	2	0.3539	0.3566	0	0	0	0.2321	0.236833	0.0773667	-1.61409	0.649217
novel-m0277-3p	22	TGCTGGACTGTATTGATGGACA	7	2	0	0	3	2	0	0.2359	0	0	0.2911	0.2548	0	0.0786333	0.181967	1.21046	0.74777
novel-m0278-5p	23	TATAGTCTGGTAGGACTTGCACC	133	31	22	25	15	19	21	3.657	2.6153	2.7928	1.4554	2.4209	2.4371	3.0217	2.10447	-0.521906	0.565905
novel-m0279-3p	22	TGATCCCTTGAAGATGGAGGCT	13	2	2	0	3	2	4	0.2359	0.2378	0	0.2911	0.2548	0.4642	0.1579	0.3367	1.09245	0.498683
novel-m0280-3p	21	TGCATACTGTAGTGTATGGCT	17	0	2	4	5	6	0	0	0.2378	0.4469	0.4851	0.7645	0	0.228233	0.416533	0.867922	0.644902
novel-m0281-3p	23	GAAGAGAACATCGATAGAATGGA	63	12	6	16	23	2	4	1.4156	0.7133	1.7874	2.2317	0.2548	0.4642	1.30543	0.983567	-0.408434	0.873025
novel-m0282-3p	22	ACAACACATGGCACTCGGCTAG	21	8	5	0	0	4	4	0.9437	0.5944	0	0	0.5097	0.4642	0.5127	0.324633	-0.659304	0.779632
novel-m0283-3p	22	CCAGTGTCAAGTGACTTTTATG	1039	156	175	186	201	152	169	18.4031	20.8034	20.7786	19.5028	19.3675	19.6132	19.995	19.4945	-0.0365745	0.776892
novel-m0283-5p	21	CAAAAGTCCCTTGACACTAGA	3845	588	747	632	652	523	703	69.3654	88.8009	70.6027	63.2628	66.6396	81.5863	76.2563	70.4962	-0.113311	0.908067
novel-m0284-3p	23	TCAAGTGACTTTTGTGCCATGCT	91	19	15	23	12	11	11	2.2414	1.7832	2.5694	1.1643	1.4016	1.2766	2.198	1.28083	-0.779109	0.393934
novel-m0285-3p	21	TTGGTGCTAGAGGATCTCGGA	38	5	7	9	5	3	9	0.5898	0.8321	1.0054	0.4851	0.3823	1.0445	0.8091	0.6373	-0.344345	0.925419
novel-m0285-5p	22	ACCGAGCCTAGAGTCACTAACA	363	37	73	28	28	152	45	4.3648	8.678	3.128	2.7168	19.3675	5.2225	5.39027	9.10227	0.755869	0.232667
novel-m0286-5p	21	TTGAGATATACAGTCTAACAC	24	2	6	4	6	0	6	0.2359	0.7133	0.4469	0.5822	0	0.6963	0.465367	0.426167	-0.12695	1
novel-m0287-3p	24	TAGACGGTTTCAATTTTGAAGAGT	14	0	3	2	9	0	0	0	0.3566	0.2234	0.8733	0	0	0.193333	0.2911	0.590424	0.82908
novel-m0288-5p	20	ACAGTCCGCAGTGAACCCCT	119	0	0	0	0	119	0	0	0	0	0	15.1627	0	0.01	5.05423	8.98135	0.000998037
novel-m0289-3p	21	TAGCGGCAGTACGTACTGTGC	37	0	4	14	3	3	13	0	0.4755	1.564	0.2911	0.3823	1.5087	0.679833	0.727367	0.0975017	0.890564
novel-m0290-3p	23	TGCGCGTTCGGTCACAACTGCCT	47	14	12	6	4	2	9	1.6516	1.4265	0.6703	0.3881	0.2548	1.0445	1.24947	0.562467	-1.15147	0.299202
novel-m0291-3p	23	CTTCCAAGCTGGAAGGATTGCCT	39	0	12	10	9	4	4	0	1.4265	1.1171	0.8733	0.5097	0.4642	0.847867	0.615733	-0.461532	0.822065
novel-m0292-3p	23	CACCAATTCAGGGGTGGACATCT	6	0	0	3	0	0	3	0	0	0.3351	0	0	0.3482	0.1117	0.116067	0.0553245	1
novel-m0293-5p	22	ACCGAGCTCCACAAAAGAAATG	9	3	0	0	4	0	2	0.3539	0	0	0.3881	0	0.2321	0.117967	0.206733	0.809392	0.782909
novel-m0294-3p	21	ATAAACCATGAGAGCCAGGAG	25	5	6	10	2	2	0	0.5898	0.7133	1.1171	0.1941	0.2548	0	0.806733	0.149633	-2.43066	0.0473551
novel-m0295-5p	22	TGCTACAGCTTCTCTGGCTGCT	57	11	15	10	7	5	9	1.2977	1.7832	1.1171	0.6792	0.6371	1.0445	1.39933	0.786933	-0.830426	0.392641
novel-m0296-3p	21	TTGACCCTGAAGATGAAGGCC	183	27	21	44	45	22	24	3.1851	2.4964	4.9154	4.3663	2.8032	2.7853	3.5323	3.31827	-0.090178	0.893274
novel-m0297-5p	21	GCGGGTTGGGCGGGGGTGGGC	6	0	2	2	0	2	0	0	0.2378	0.2234	0	0.2548	0	0.153733	0.0849333	-0.856027	0.86877
novel-m0298-3p	22	CTTTTAGAGTACTGGACACGGA	370	70	83	79	50	44	44	8.2578	9.8668	8.8253	4.8514	5.6064	5.1064	8.9833	5.18807	-0.792048	0.223282
novel-m0299-3p	21	GGACCTGAAGATGAAGGCACT	8	0	2	6	0	0	0	0	0.2378	0.6703	0	0	0	0.3027	0.01	-4.91982	0.23026
novel-m0300-3p	22	TTTGTCCTAACGGTGTAAGAAC	27	2	5	9	3	2	6	0.2359	0.5944	1.0054	0.2911	0.2548	0.6963	0.6119	0.414067	-0.563433	0.82518
novel-m0301-3p	22	CAATACTTCTGCAGTGCAAGAC	213	54	28	30	35	30	36	6.3703	3.3285	3.3514	3.396	3.8225	4.178	4.35007	3.79883	-0.195481	0.962048
novel-m0302-5p	22	CTTGCACTGCAGAAGTATTGCA	61	9	12	15	12	11	2	1.0617	1.4265	1.6757	1.1643	1.4016	0.2321	1.38797	0.932667	-0.573539	0.670479
novel-m0303-3p	22	CCTGCCGTTTTTCTTGGACTGC	598	94	102	119	94	79	110	11.089	12.1254	13.2939	9.1207	10.066	12.766	12.1694	10.6509	-0.192287	0.967351
novel-m0304-5p	20	CTGGATTAAATATTGTGAAT	14	0	4	4	3	0	3	0	0.4755	0.4469	0.2911	0	0.3482	0.307467	0.2131	-0.528899	0.897884
novel-m0305-5p	20	CTGGATTAAATATTGTGAAT	14	0	4	4	3	0	3	0	0.4755	0.4469	0.2911	0	0.3482	0.307467	0.2131	-0.528899	0.897829
novel-m0306-3p	22	CGGATACTTTTTGAACAGGCCT	47	2	8	4	12	12	9	0.2359	0.951	0.4469	1.1643	1.529	1.0445	0.5446	1.24593	1.19396	0.107823
novel-m0307-3p	21	TTGGTAGCATCCCAGAAGAGC	18	4	3	3	3	2	3	0.4719	0.3566	0.3351	0.2911	0.2548	0.3482	0.387867	0.298033	-0.380087	0.876751
novel-m0308-3p	22	CTTGGCTACGGCGGATACAAGG	6	0	0	0	0	6	0	0	0	0	0	0.7645	0	0.01	0.254833	4.67148	0.412618
novel-m0309-5p	24	CGCACGTGCTCTTACGGCTGTAGC	125	0	0	0	0	125	0	0	0	0	0	15.9272	0	0.01	5.30907	9.05231	0.000890152
novel-m0310-5p	21	CGCAAACATGGTCAGCGAACT	20	3	5	5	2	3	2	0.3539	0.5944	0.5586	0.1941	0.3823	0.2321	0.5023	0.2695	-0.898264	0.549175
novel-m0311-3p	22	TCTTGGCCCACTTGACTCTTGA	544	79	79	127	103	66	90	9.3195	9.3913	14.1876	9.994	8.4096	10.4449	10.9661	9.61617	-0.189521	0.991172
novel-m0312-3p	22	CTAACCTTGGCACTAGATGGAG	10	0	2	3	5	0	0	0	0.2378	0.3351	0.4851	0	0	0.190967	0.1617	-0.240001	1
novel-m0313-3p	22	ATTACGTGACCCTTGAAGATGG	28	5	3	9	7	2	2	0.5898	0.3566	1.0054	0.6792	0.2548	0.2321	0.6506	0.3887	-0.743114	0.648924
novel-m0314-3p	21	CTTGTATATGGACGCTCTCCT	10649	1670	1819	1546	2660	1335	1619	197.007	216.237	172.708	258.097	170.103	187.892	195.317	205.364	0.0723631	0.573458
novel-m0314-5p	24	AGGAGAACATCTATATACATCGTG	2056	327	359	398	362	304	306	38.5756	42.6767	44.4618	35.1245	38.735	35.5127	41.9047	36.4574	-0.2009	0.939018
novel-m0315-5p	21	TGCATACTGTAGTGTATGGCT	17	0	2	4	5	6	0	0	0.2378	0.4469	0.4851	0.7645	0	0.228233	0.416533	0.867922	0.645694
novel-m0316-3p	21	TGCATACTGTAGTGTATGGCT	17	0	2	4	5	6	0	0	0.2378	0.4469	0.4851	0.7645	0	0.228233	0.416533	0.867922	0.644318
novel-m0317-5p	21	TGCATACTGTAGTGTATGGCT	17	0	2	4	5	6	0	0	0.2378	0.4469	0.4851	0.7645	0	0.228233	0.416533	0.867922	0.644245
novel-m0318-5p	23	ACTTATGAATTACTGACCAGTCC	14	2	5	3	2	2	0	0.2359	0.5944	0.3351	0.1941	0.2548	0	0.388467	0.149633	-1.37636	0.42631
novel-m0319-5p	21	TTAGGGCTCCTAAGGAAAACT	67	6	8	22	8	13	10	0.7078	0.951	2.4577	0.7762	1.6564	1.1605	1.37217	1.1977	-0.196189	1
novel-m0320-3p	20	TGACCCCTGAAGATGCGACC	46	13	3	3	16	5	6	1.5336	0.3566	0.3351	1.5525	0.6371	0.6963	0.741767	0.961967	0.375021	0.558548
novel-m0321-5p	22	TCATGTGTAGCTGAATGGTACA	6	2	2	0	0	2	0	0.2359	0.2378	0	0	0.2548	0	0.1579	0.0849333	-0.894608	0.866484
novel-m0322-3p	21	TAGTTGGTGAAAAATAAAAAC	6	3	0	3	0	0	0	0.3539	0	0.3351	0	0	0	0.229667	0.01	-4.52147	0.307886
novel-m0323-3p	21	TAGTTGGTGAAAAATAAAAAC	6	3	0	3	0	0	0	0.3539	0	0.3351	0	0	0	0.229667	0.01	-4.52147	0.307813
novel-m0324-5p	20	GGATGTTATGCTGTGTCACT	28	6	6	5	3	5	3	0.7078	0.7133	0.5586	0.2911	0.6371	0.3482	0.6599	0.425467	-0.633201	0.717395
novel-m0325-5p	20	GGATGTTATGCTGTGTCACT	28	6	6	5	3	5	3	0.7078	0.7133	0.5586	0.2911	0.6371	0.3482	0.6599	0.425467	-0.633201	0.716994
novel-m0326-5p	22	AGACACACACAGGGGTTCTGAG	7	2	3	0	0	0	2	0.2359	0.3566	0	0	0	0.2321	0.1975	0.0773667	-1.35207	0.750707
novel-m0327-5p	23	CAGTACTGTAAAGTGTTATGGCT	10	0	4	3	3	0	0	0	0.4755	0.3351	0.2911	0	0	0.2702	0.0970333	-1.47748	0.685542
novel-m0328-5p	21	ACTGACGTTAATGTGTTTACT	52	18	3	15	6	10	0	2.1234	0.3566	1.6757	0.5822	1.2742	0	1.38523	0.6188	-1.16258	0.362722
novel-m0329-5p	20	ATGTGCACTGTAGAGCAGAT	12	2	2	2	0	3	3	0.2359	0.2378	0.2234	0	0.3823	0.3482	0.232367	0.2435	0.0675186	1
novel-m0330-3p	22	TAAAACATCAGGAAACATGAAC	15	2	4	2	2	5	0	0.2359	0.4755	0.2234	0.1941	0.6371	0	0.3116	0.277067	-0.169462	1
novel-m0331-3p	22	TGTCTAATTCGATCTGCACGGA	17	4	6	5	2	0	0	0.4719	0.7133	0.5586	0.1941	0	0	0.581267	0.0647	-3.16736	0.07212
novel-m0331-5p	22	AGTGTAGATCGATTTAGACATC	9	0	0	3	2	2	2	0	0	0.3351	0.1941	0.2548	0.2321	0.1117	0.227	1.02306	0.728262
novel-m0332-3p	22	TGTCTAATTCGATCTGCACGGA	17	4	6	5	2	0	0	0.4719	0.7133	0.5586	0.1941	0	0	0.581267	0.0647	-3.16736	0.0731597
novel-m0332-5p	22	AGTGTAGATCGATTTAGACATC	9	0	0	3	2	2	2	0	0	0.3351	0.1941	0.2548	0.2321	0.1117	0.227	1.02306	0.727975
novel-m0333-3p	20	TTTCCCTGAGGACAGAGACT	34	5	17	6	3	0	3	0.5898	2.0209	0.6703	0.2911	0	0.3482	1.09367	0.2131	-2.35957	0.0493733
novel-m0334-3p	22	TGCATGAGTTGGTGAATAAACA	10	2	2	0	0	0	6	0.2359	0.2378	0	0	0	0.6963	0.1579	0.2321	0.555735	0.814069
novel-m0334-5p	21	TTTATTCACCAATTTGTGCAC	21	5	0	5	6	2	3	0.5898	0	0.5586	0.5822	0.2548	0.3482	0.3828	0.395067	0.0455053	0.903421
novel-m0335-5p	21	TACTACTACTCTGCTACTACT	36	10	8	2	8	5	3	1.1797	0.951	0.2234	0.7762	0.6371	0.3482	0.7847	0.587167	-0.418371	0.783183
novel-m0336-3p	22	TAACATACCAGAAGAGCAAAGA	61	16	9	13	6	9	8	1.8875	1.0699	1.4523	0.5822	1.1468	0.9284	1.4699	0.8858	-0.730665	0.461124
novel-m0337-3p	21	CAATTCTGCTAGACCTGACCT	98	29	7	12	24	10	16	3.4211	0.8321	1.3406	2.3287	1.2742	1.8569	1.8646	1.81993	-0.0349806	0.870644
novel-m0338-5p	23	TCGCCGACATGCAGTGCATGAGC	42	7	8	15	5	3	4	0.8258	0.951	1.6757	0.4851	0.3823	0.4642	1.15083	0.443867	-1.37448	0.146144
novel-m0339-5p	22	AGTGTCCCTGCCGCTGTGTACC	33	14	17	0	2	0	0	1.6516	2.0209	0	0.1941	0	0	1.22417	0.0647	-4.24189	0.0158382
novel-m0340-3p	22	CAATGATTTATTACACGTATCA	1112	188	158	195	240	146	185	22.178	18.7825	21.784	23.2869	18.603	21.4701	20.9148	21.12	0.0140833	0.689646
novel-m0340-5p	22	GGTGTGTGTAAGAGGTCATTGA	2886	480	411	528	553	464	450	56.6248	48.8583	58.9845	53.657	59.1219	52.2245	54.8225	55.0011	0.00469235	0.697552
novel-m0341-3p	20	TTCCCCCAGGCCAGAAGGTT	341	71	48	50	72	57	43	8.3758	5.7061	5.5857	6.9861	7.2628	4.9903	6.55587	6.41307	-0.0317721	0.809102
novel-m0341-5p	22	ATCTTTCTTGACTGTGAGGGCA	9	3	0	0	3	0	3	0.3539	0	0	0.2911	0	0.3482	0.117967	0.2131	0.853151	0.779207
novel-m0342-5p	21	TGAGTAGTTTCTGATGTTTCA	16	6	2	4	0	2	2	0.7078	0.2378	0.4469	0	0.2548	0.2321	0.464167	0.1623	-1.51598	0.291585
novel-m0343-5p	22	TGATTTTGCGAGCCCTGAGAGT	26	7	4	0	3	8	4	0.8258	0.4755	0	0.2911	1.0193	0.4642	0.433767	0.591533	0.44754	0.695996
novel-m0344-5p	22	CATTTGTTGGTGATTAGTGCCT	10	0	0	4	0	4	2	0	0	0.4469	0	0.5097	0.2321	0.148967	0.247267	0.731078	0.810708
novel-m0345-5p	21	CACGTAGGACAGTATTCTAGC	43	9	7	9	4	12	2	1.0617	0.8321	1.0054	0.3881	1.529	0.2321	0.9664	0.7164	-0.431855	0.75189
novel-m0346-5p	22	ACGGATCGTACTGCTTTCATCT	12	0	0	2	3	3	4	0	0	0.2234	0.2911	0.3823	0.4642	0.0744667	0.3792	2.34829	0.207659
novel-m0347-3p	22	CTTGACCCTGAAGATGGAGGCA	25	0	8	7	0	6	4	0	0.951	0.782	0	0.7645	0.4642	0.577667	0.409567	-0.496139	0.862397
novel-m0348-3p	22	TTCCGGTTTGTAGTGCAGTGCC	8	4	0	4	0	0	0	0.4719	0	0.4469	0	0	0	0.306267	0.01	-4.93672	0.193761
novel-m0349-3p	21	GTGGTTCAATCTTCTCTGAGC	183	33	34	20	36	27	33	3.893	4.0418	2.2343	3.493	3.4403	3.8298	3.3897	3.5877	0.0819017	0.684758
novel-m0349-5p	22	TGCAGGGATGATAGATTTGACA	1613	309	254	278	240	242	290	36.4522	30.1947	31.0562	23.2869	30.8351	33.6558	32.5677	29.2593	-0.154548	0.987456
novel-m0350-3p	21	TACCTCCCTGCCAGACTACAC	16	8	2	2	2	2	0	0.9437	0.2378	0.2234	0.1941	0.2548	0	0.4683	0.149633	-1.646	0.324133
novel-m0351-3p	22	TCCGTTATAACCGAGGTTGACT	63	8	12	5	16	9	13	0.9437	1.4265	0.5586	1.5525	1.1468	1.5087	0.976267	1.40267	0.522825	0.370747
novel-m0352-5p	20	TTTGAACATGGCATTGCTAA	65	8	18	9	10	8	12	0.9437	2.1398	1.0054	0.9703	1.0193	1.3927	1.36297	1.12743	-0.273708	0.902371
novel-m0353-5p	22	TATCCCAGAAGAGTGCAGATCT	33	2	2	12	6	4	7	0.2359	0.2378	1.3406	0.5822	0.5097	0.8124	0.604767	0.634767	0.0698477	0.85085
novel-m0354-5p	23	CAGTACTGTAAAGTGTTATGGCT	10	0	4	3	3	0	0	0	0.4755	0.3351	0.2911	0	0	0.2702	0.0970333	-1.47748	0.685355
novel-m0355-3p	22	CACAGTTAAACGGATGCTCTCC	1726	310	259	294	309	306	248	36.5702	30.7891	32.8436	29.9819	38.9899	28.7815	33.401	32.5844	-0.035707	0.782399
novel-m0355-5p	22	AGGGCATCCATTTATCTTTGGG	61	18	13	5	13	6	6	2.1234	1.5454	0.5586	1.2614	0.7645	0.6963	1.40913	0.9074	-0.634998	0.578745
novel-m0356-3p	22	CACAGTTAAACGGATGCTCTCC	1726	310	259	294	309	306	248	36.5702	30.7891	32.8436	29.9819	38.9899	28.7815	33.401	32.5844	-0.035707	0.782646
novel-m0356-5p	22	AGGGCATCCATTTATCTTTGGG	61	18	13	5	13	6	6	2.1234	1.5454	0.5586	1.2614	0.7645	0.6963	1.40913	0.9074	-0.634998	0.579243
novel-m0357-3p	23	AACACAGCGCCACATCCTAGAAT	13	0	6	2	2	0	3	0	0.7133	0.2234	0.1941	0	0.3482	0.312233	0.180767	-0.788496	0.795817
novel-m0358-3p	22	TCAAGGCTGCGTTAACGTTCCT	23	7	4	0	5	0	7	0.8258	0.4755	0	0.4851	0	0.8124	0.433767	0.4325	-0.00421906	1
novel-m0359-5p	24	ACAGATTATGAGAGCTGAGGGCAC	107	34	23	9	17	12	12	4.0109	2.7342	1.0054	1.6495	1.529	1.3927	2.5835	1.52373	-0.761716	0.408074
novel-m0360-5p	24	TATCCTGGCGGCCGGTCGGTTGGC	66	8	17	14	6	9	12	0.9437	2.0209	1.564	0.5822	1.1468	1.3927	1.50953	1.04057	-0.536733	0.672557
novel-m0361-5p	21	TTGACCCTTGGAGATGGGACT	73	15	12	15	11	13	7	1.7695	1.4265	1.6757	1.0673	1.6564	0.8124	1.6239	1.1787	-0.462266	0.680279
novel-m0362-3p	22	TGGCGGATGTGAGGGGCACACT	15	0	7	0	0	3	5	0	0.8321	0	0	0.3823	0.5803	0.277367	0.320867	0.21018	0.925877
novel-m0362-5p	23	AGTGTACCCCCTCACCCGCGAGT	7	0	2	0	2	0	3	0	0.2378	0	0.1941	0	0.3482	0.0792667	0.180767	1.18934	0.747313
novel-m0363-5p	21	ATCCCAGTAGCCGCGCGGTCT	100	26	16	6	13	17	22	3.0672	1.902	0.6703	1.2614	2.1661	2.5532	1.87983	1.99357	0.0847471	0.785099
novel-m0364-3p	22	TCTGAAGACGGAGGCAGTATGC	7	2	0	3	0	2	0	0.2359	0	0.3351	0	0.2548	0	0.190333	0.0849333	-1.16413	0.755258
novel-m0365-5p	24	CTTTGCAGCACGAGGATGGAGGAG	8	3	0	0	0	2	3	0.3539	0	0	0	0.2548	0.3482	0.117967	0.201	0.768816	0.795687
novel-m0366-3p	22	GTTGAATGCAAAACGGTACCTG	42	3	0	7	9	8	15	0.3539	0	0.782	0.8733	1.0193	1.7408	0.378633	1.21113	1.67748	0.050633
novel-m0367-5p	22	TGTACCGTGTCACACTTGTGAA	87	15	18	14	3	19	18	1.7695	2.1398	1.564	0.2911	2.4209	2.089	1.82443	1.60033	-0.189076	1
novel-m0368-5p	22	TGTACCGTGTCACACTTGTGAA	87	15	18	14	3	19	18	1.7695	2.1398	1.564	0.2911	2.4209	2.089	1.82443	1.60033	-0.189076	1
novel-m0369-3p	21	GAAGGCACTGTGATCCTTTGA	9	0	0	2	0	2	5	0	0	0.2234	0	0.2548	0.5803	0.0744667	0.278367	1.90232	0.492425
novel-m0370-3p	22	TATCCCAGAAGAGTGCAGATCT	33	2	2	12	6	4	7	0.2359	0.2378	1.3406	0.5822	0.5097	0.8124	0.604767	0.634767	0.0698477	0.851373
novel-m0371-5p	22	TGGAGGAATGTGCTGCATCCAT	53	11	11	5	8	11	7	1.2977	1.3076	0.5586	0.7762	1.4016	0.8124	1.05463	0.996733	-0.081462	1
novel-m0372-5p	22	AAATTCCTTTAATCTGGCACCT	72	11	9	10	12	10	20	1.2977	1.0699	1.1171	1.1643	1.2742	2.3211	1.16157	1.58653	0.449806	0.419374
novel-m0373-5p	23	ATTCCGTCGGAACATAAGCGACA	6	0	0	2	2	0	2	0	0	0.2234	0.1941	0	0.2321	0.0744667	0.142067	0.931901	0.866364
novel-m0374-5p	20	CAACTCAAACACACTGTTTC	6	0	0	2	0	2	2	0	0	0.2234	0	0.2548	0.2321	0.0744667	0.1623	1.124	0.86549
novel-m0375-3p	22	TAGCCCAGAAGAACTCAGATCA	10	0	3	2	3	2	0	0	0.3566	0.2234	0.2911	0.2548	0	0.193333	0.181967	-0.0874162	1
novel-m0376-3p	20	TCCTTCAAACATCAGGAACT	34	7	6	9	3	5	4	0.8258	0.7133	1.0054	0.2911	0.6371	0.4642	0.848167	0.464133	-0.869808	0.446329
novel-m0377-3p	20	ACTTTCCTGGATTCGGAACT	58	35	18	0	3	2	0	4.1289	2.1398	0	0.2911	0.2548	0	2.08957	0.181967	-3.52146	0.0157475
novel-m0378-5p	23	AGAACCTGATCGGGAGTTGTTGT	15	6	7	0	2	0	0	0.7078	0.8321	0	0.1941	0	0	0.5133	0.0647	-2.98796	0.210103
novel-m0379-5p	21	TACAGTGGGCCTCAAGGACAC	19	4	2	5	3	0	5	0.4719	0.2378	0.5586	0.2911	0	0.5803	0.422767	0.290467	-0.541489	0.895521
novel-m0380-5p	21	TACAGTGGGCCTCAAGGACAC	19	4	2	5	3	0	5	0.4719	0.2378	0.5586	0.2911	0	0.5803	0.422767	0.290467	-0.541489	0.895343
novel-m0381-3p	22	AAGATGGGACTGATACGTTGTC	8	2	0	0	2	0	4	0.2359	0	0	0.1941	0	0.4642	0.0786333	0.219433	1.48057	0.647776
novel-m0382-5p	22	TCTTCATCTTTAGGGTCAAGCA	13	2	2	0	0	7	2	0.2359	0.2378	0	0	0.8919	0.2321	0.1579	0.374667	1.2466	0.534975
novel-m0383-5p	22	TGAGTGGTTCCTAATGCTTCAT	6	0	0	0	3	0	3	0	0	0	0.2911	0	0.3482	0.01	0.2131	4.41346	0.278237
novel-m0384-5p	22	CTGGTAGCATTTGTACTGTGCT	22	0	7	2	5	3	5	0	0.8321	0.2234	0.4851	0.3823	0.5803	0.351833	0.482567	0.455836	0.739623
novel-m0385-5p	22	CTGGTAGCATTTGTACTGTGCT	22	0	7	2	5	3	5	0	0.8321	0.2234	0.4851	0.3823	0.5803	0.351833	0.482567	0.455836	0.738831
novel-m0386-3p	19	ACTACATGGTGCTGTAACT	684	124	123	107	145	89	96	14.6281	14.6218	11.9533	14.0692	11.3402	11.1412	13.7344	12.1835	-0.172861	1
novel-m0386-5p	20	TACAACACCGTGTAATCTGT	394	66	57	71	75	72	53	7.7859	6.776	7.9316	7.2772	9.1741	6.1509	7.49783	7.53407	0.00695504	0.748002
novel-m0387-3p	24	GGTGGTGGTGGTGGCGGTGGTGGC	6	0	0	6	0	0	0	0	0	0.6703	0	0	0	0.223433	0.01	-4.48177	0.591014
novel-m0388-3p	22	AAACACTGGGAACCATGCACCC	357	56	66	64	60	62	49	6.6062	7.8459	7.1496	5.8217	7.8999	5.6867	7.20057	6.46943	-0.154471	1
novel-m0388-5p	22	TGAGTGGCTCCCAGCATTTTGA	314	49	53	75	45	48	44	5.7804	6.3005	8.3785	4.3663	6.1161	5.1064	6.8198	5.19627	-0.392254	0.683998
novel-m0389-5p	21	CACGGAGAGCAGTCGGTGAGT	310	39	70	71	43	45	42	4.6008	8.3214	7.9316	4.1722	5.7338	4.8743	6.95127	4.92677	-0.496635	0.535811
novel-m0390-5p	21	ATCCCAGTAGCCGCGCGGTCT	100	26	16	6	13	17	22	3.0672	1.902	0.6703	1.2614	2.1661	2.5532	1.87983	1.99357	0.0847471	0.78464
novel-m0391-3p	21	TCCTTTGAAAGGTCAGGAACT	182	34	23	35	29	24	37	4.0109	2.7342	3.91	2.8138	3.058	4.294	3.5517	3.3886	-0.0678204	0.890825
novel-m0392-5p	21	ATCCCAGTAGCCGCGCGGTCT	100	26	16	6	13	17	22	3.0672	1.902	0.6703	1.2614	2.1661	2.5532	1.87983	1.99357	0.0847471	0.784908
novel-m0393-3p	22	TAGGCAGCAGATTCCTCTGAAA	93	21	15	27	6	11	13	2.4773	1.7832	3.0163	0.5822	1.4016	1.5087	2.4256	1.16417	-1.05904	0.201347
novel-m0394-3p	20	TGTATCTCGTGCACAAAAAA	12	4	3	0	0	0	5	0.4719	0.3566	0	0	0	0.5803	0.276167	0.193433	-0.513703	0.908012
novel-m0395-5p	20	TGAGATGTGACACCATGTAG	15	0	5	4	2	0	4	0	0.5944	0.4469	0.1941	0	0.4642	0.3471	0.219433	-0.661569	0.806449
novel-m0396-3p	24	CCCAGACTGTCTGCCCACCGCTGA	39	10	4	15	2	0	8	1.1797	0.4755	1.6757	0.1941	0	0.9284	1.1103	0.374167	-1.5692	0.247778
novel-m0397-5p	22	TGTTGCACAGCATCAGGTGACT	9	0	0	2	0	4	3	0	0	0.2234	0	0.5097	0.3482	0.0744667	0.285967	1.94118	0.482228
novel-m0398-5p	21	AAGCAGTCGCGGACAGCCGAC	7	0	0	2	0	0	5	0	0	0.2234	0	0	0.5803	0.0744667	0.193433	1.37717	0.813501
novel-m0399-3p	21	GAACAGCCACGCAACATTGCA	6	0	2	0	2	0	2	0	0.2378	0	0.1941	0	0.2321	0.0792667	0.142067	0.841782	0.865208
novel-m0400-3p	21	TGTCCTGTTGCCGGAGGGTGC	856	133	132	177	140	142	132	15.6898	15.6917	19.7732	13.584	18.0933	15.3192	17.0516	15.6655	-0.122313	0.929688
novel-m0401-5p	21	TGGGATGTGACACTGTGTTGT	28	5	7	2	7	5	2	0.5898	0.8321	0.2234	0.6792	0.6371	0.2321	0.548433	0.516133	-0.0875725	1
novel-m0402-3p	21	TCGTTCACCATTAAGCAACCT	5486	786	910	1033	1090	899	768	92.7231	108.178	115.4	105.761	114.549	89.1299	105.433	103.147	-0.0316357	0.752162
novel-m0402-5p	21	AGTGCTTGATGGTGAATAAGG	1284	274	151	174	335	179	171	32.3233	17.9504	19.4381	32.5047	22.8078	19.8453	23.2373	25.0526	0.10852	0.581106
novel-m0403-5p	22	TACCGATGTTGCGGGACAGCCT	7	4	0	0	0	3	0	0.4719	0	0	0	0.3823	0	0.1573	0.127433	-0.303776	1
novel-m0404-5p	22	TACCGATGTTGCGGGACAGCCT	7	4	0	0	0	3	0	0.4719	0	0	0	0.3823	0	0.1573	0.127433	-0.303776	1
novel-m0405-5p	22	TAGAACAAAGGAATACAAGCCC	13	2	2	5	2	2	0	0.2359	0.2378	0.5586	0.1941	0.2548	0	0.3441	0.149633	-1.2014	0.598662
novel-m0406-5p	22	ACATCGGTATGGGATTACCACT	6	0	2	2	0	2	0	0	0.2378	0.2234	0	0.2548	0	0.153733	0.0849333	-0.856027	0.869114
novel-m0407-3p	22	AAGATGGGACTGATATGTTGTC	148	29	9	24	27	18	41	3.4211	1.0699	2.6811	2.6198	2.2935	4.7582	2.3907	3.22383	0.431344	0.369632
novel-m0408-5p	22	TTTTGAGAACCATCTCTGTTCT	9	2	0	3	0	4	0	0.2359	0	0.3351	0	0.5097	0	0.190333	0.1699	-0.163842	1
novel-m0409-3p	22	TAAAGCACCCAGCCAAATGAAT	127	17	18	19	27	35	11	2.0055	2.1398	2.1225	2.6198	4.4596	1.2766	2.08927	2.78533	0.414853	0.422568
novel-m0409-5p	21	TTAGTTTGGCTAGGTGCTTAA	14	4	0	0	3	7	0	0.4719	0	0	0.2911	0.8919	0	0.1573	0.394333	1.3259	0.532121
novel-m0410-3p	24	ATGGACTGGAATACGGAAGAAAAC	31	5	3	8	5	4	6	0.5898	0.3566	0.8937	0.4851	0.5097	0.6963	0.613367	0.5637	-0.121822	1
novel-m0411-5p	21	ATTGCGATATCCGGCAAACCT	7	0	0	0	5	0	2	0	0	0	0.4851	0	0.2321	0.01	0.239067	4.57934	0.230481
novel-m0412-5p	21	GGTGGTGGTGGTGGTGGTGGA	6	2	0	4	0	0	0	0.2359	0	0.4469	0	0	0	0.2276	0.01	-4.50843	0.315563
novel-m0413-3p	22	TAACAGCACCCAGATTGTAAGA	76	6	13	8	14	11	24	0.7078	1.5454	0.8937	1.3584	1.4016	2.7853	1.04897	1.84843	0.817334	0.198774
novel-m0414-3p	23	ACTCTAGTTCTGTTGGACTGTGT	55	15	7	9	2	20	2	1.7695	0.8321	1.0054	0.1941	2.5484	0.2321	1.20233	0.991533	-0.278104	0.874604
novel-m0415-3p	22	GATGTGCCCAATACATTGTCCT	36	6	2	8	11	3	6	0.7078	0.2378	0.8937	1.0673	0.3823	0.6963	0.6131	0.7153	0.222426	0.698045
novel-m0416-5p	22	TGAACTATTTTCCATCGTCCCA	247	37	43	38	62	33	34	4.3648	5.1117	4.2451	6.0158	4.2048	3.9459	4.57387	4.72217	0.0460347	0.699644
novel-m0417-5p	22	TGTGCACTTGGCTTCTGAGCAT	50	7	16	6	5	8	8	0.8258	1.902	0.6703	0.4851	1.0193	0.9284	1.1327	0.810933	-0.482111	0.717149
novel-m0418-5p	22	ATCCACAGTCCAGCTCCACACT	37	3	6	12	6	5	5	0.3539	0.7133	1.3406	0.5822	0.6371	0.5803	0.8026	0.599867	-0.420039	0.84868
novel-m0419-3p	22	AGCTACTCAATAAGTCCTCTGC	24	2	4	3	9	2	4	0.2359	0.4755	0.3351	0.8733	0.2548	0.4642	0.348833	0.530767	0.60554	0.535067
novel-m0419-5p	22	AGAGTCCTTCTTGGGAAGCTGA	47	11	3	16	5	6	6	1.2977	0.3566	1.7874	0.4851	0.7645	0.6963	1.14723	0.648633	-0.822684	0.490863
novel-m0420-3p	24	CGAGCCTACGTGCAGGTTGTCGGT	6	0	0	0	4	0	2	0	0	0	0.3881	0	0.2321	0.01	0.206733	4.3697	0.291802
novel-m0421-5p	21	ATGGGAGGGCAGGGAAGGGTT	6	0	0	0	0	6	0	0	0	0	0	0.7645	0	0.01	0.254833	4.67148	0.416473
novel-m0422-3p	22	TATCCCAGAAGAGTGCAGATCT	33	2	2	12	6	4	7	0.2359	0.2378	1.3406	0.5822	0.5097	0.8124	0.604767	0.634767	0.0698477	0.851144
novel-m0423-3p	21	TCTCCAAGGATTACTGGAGCT	81	11	15	13	24	9	9	1.2977	1.7832	1.4523	2.3287	1.1468	1.0445	1.51107	1.50667	-0.00420704	0.832893
novel-m0424-3p	21	TCTCCAAGGATTACTGGAGCT	81	11	15	13	24	9	9	1.2977	1.7832	1.4523	2.3287	1.1468	1.0445	1.51107	1.50667	-0.00420704	0.833121
novel-m0425-3p	22	CTTGACCCTGAAGATGGAGGCA	25	0	8	7	0	6	4	0	0.951	0.782	0	0.7645	0.4642	0.577667	0.409567	-0.496139	0.86237
novel-m0426-3p	24	AGACACCTGAACCCTGATGCACAG	244	42	40	58	33	25	46	4.9547	4.7551	6.4794	3.202	3.1854	5.3385	5.3964	3.90863	-0.465333	0.623557
novel-m0427-3p	20	CAGGTTTGGCCCTAAGGGAA	12	0	4	0	5	3	0	0	0.4755	0	0.4851	0.3823	0	0.1585	0.289133	0.867252	0.717715
novel-m0428-3p	21	TGGCTTGCGCGGTAGAAAATC	6	0	0	4	0	0	2	0	0	0.4469	0	0	0.2321	0.148967	0.0773667	-0.945206	0.915758
novel-m0428-5p	21	ATTTTCTACCTTGCACACCAG	6	2	0	2	2	0	0	0.2359	0	0.2234	0.1941	0	0	0.1531	0.0647	-1.24264	0.867372
novel-m0429-3p	21	AGTCACGATCTGAAGAGGATG	264	35	50	40	55	43	41	4.1289	5.9438	4.4685	5.3366	5.479	4.7582	4.84707	5.19127	0.0989747	0.636852
novel-m0429-5p	24	ATCCCCATCAAGATCGAGGTCTGT	90	14	10	16	17	15	18	1.6516	1.1888	1.7874	1.6495	1.9113	2.089	1.5426	1.88327	0.287873	0.516605
novel-m0430-3p	22	TATCCCAGAAGAGTGCAGATCT	33	2	2	12	6	4	7	0.2359	0.2378	1.3406	0.5822	0.5097	0.8124	0.604767	0.634767	0.0698477	0.851519
novel-m0431-5p	20	TCCCAGCGGCCGCGCGGTCT	6	2	0	2	2	0	0	0.2359	0	0.2234	0.1941	0	0	0.1531	0.0647	-1.24264	0.867405
novel-m0432-5p	22	AAGGAACATACCACCTCCATCT	31	4	3	4	10	4	6	0.4719	0.3566	0.4469	0.9703	0.5097	0.6963	0.425133	0.725433	0.770928	0.28935
novel-m0433-3p	24	GTCATGGCGTACTGTACGAGAGTT	6	0	0	0	6	0	0	0	0	0	0.5822	0	0	0.01	0.194067	4.27848	0.468982
novel-m0434-5p	22	TTCCGGTTTGTAGTGCAGTGCC	8	4	0	4	0	0	0	0.4719	0	0.4469	0	0	0	0.306267	0.01	-4.93672	0.193002
novel-m0435-3p	22	TCAGACAGATGTTTGCCTACCC	21	5	2	8	3	0	3	0.5898	0.2378	0.8937	0.2911	0	0.3482	0.573767	0.2131	-1.42893	0.373295
novel-m0436-3p	21	CGACACTGCATAATATCCCAG	7	0	0	2	3	0	2	0	0	0.2234	0.2911	0	0.2321	0.0744667	0.1744	1.22773	0.748297
novel-m0437-3p	22	TCTCCTACTTCTGACATCAAGT	12	2	3	0	0	3	4	0.2359	0.3566	0	0	0.3823	0.4642	0.1975	0.282167	0.514695	0.790126
novel-m0438-3p	21	TCCAGTTTTATTCTGTAACCT	10	4	4	2	0	0	0	0.4719	0.4755	0.2234	0	0	0	0.390267	0.01	-5.28639	0.0432491
novel-m0439-5p	20	CAACTCAAACACACTGTTTC	6	0	0	2	0	2	2	0	0	0.2234	0	0.2548	0.2321	0.0744667	0.1623	1.124	0.865922
novel-m0440-3p	20	TTAATGATGTTAGGCAGACT	6	0	0	0	4	0	2	0	0	0	0.3881	0	0.2321	0.01	0.206733	4.3697	0.291805
novel-m0441-5p	22	CAGACTCCCACAGTATTTTGGC	6	2	0	4	0	0	0	0.2359	0	0.4469	0	0	0	0.2276	0.01	-4.50843	0.316925
novel-m0442-5p	24	TCTAATAAGATCTGTATATTGAAT	29	6	3	2	8	5	5	0.7078	0.3566	0.2234	0.7762	0.6371	0.5803	0.429267	0.664533	0.630467	0.428386
novel-m0443-3p	22	TGTGTCGTTATAACCGAGGAGT	10	0	4	2	0	0	4	0	0.4755	0.2234	0	0	0.4642	0.232967	0.154733	-0.59034	0.897843
novel-m0444-3p	20	TGTATCTCGTGCACAAAAAA	12	4	3	0	0	0	5	0.4719	0.3566	0	0	0	0.5803	0.276167	0.193433	-0.513703	0.908111
novel-m0445-5p	21	ATCTTCAGGGATCAAGAAGTC	39	10	7	7	4	7	4	1.1797	0.8321	0.782	0.3881	0.8919	0.4642	0.931267	0.5814	-0.679663	0.566543
novel-m0446-5p	20	AGGGATATGACACTGTGTTG	12	3	4	3	0	0	2	0.3539	0.4755	0.3351	0	0	0.2321	0.388167	0.0773667	-2.32689	0.216301
novel-m0447-3p	22	TCCCAGAAGAGCGAAGATCTCA	35	4	8	10	7	2	4	0.4719	0.951	1.1171	0.6792	0.2548	0.4642	0.846667	0.466067	-0.861258	0.470954
novel-m0448-3p	22	TGCAGGAGTTGGTTACATATCT	14	2	3	3	3	3	0	0.2359	0.3566	0.3351	0.2911	0.3823	0	0.3092	0.224467	-0.462039	0.877078
novel-m0448-5p	22	ATATGTAACCAACTCCAACACA	44	7	9	6	10	8	4	0.8258	1.0699	0.6703	0.9703	1.0193	0.4642	0.855333	0.817933	-0.0645035	0.930682
novel-m0449-5p	21	AATGGGTTCCTGATGTTTTGA	11	3	3	0	3	2	0	0.3539	0.3566	0	0.2911	0.2548	0	0.236833	0.181967	-0.380198	1
novel-m0450-5p	22	TTTCAGAATACAAGTCAGATCT	78	12	14	12	11	11	18	1.4156	1.6643	1.3406	1.0673	1.4016	2.089	1.4735	1.5193	0.0441597	0.783402
novel-m0451-3p	22	TATGCAGGAGAAACGATATAGT	43	7	7	10	8	4	7	0.8258	0.8321	1.1171	0.7762	0.5097	0.8124	0.925	0.699433	-0.403267	0.855435
novel-m0452-3p	22	CATACCATCCCTGAAGAGTTGA	152	29	24	29	19	24	27	3.4211	2.853	3.2397	1.8435	3.058	3.1335	3.17127	2.67833	-0.243724	0.921429
novel-m0452-5p	22	AGATCTTCTGGGATGGTATGCT	375	89	61	62	63	51	49	10.4992	7.2515	6.9262	6.1128	6.4983	5.6867	8.22563	6.09927	-0.431491	0.608464
novel-m0453-5p	22	CACTGTCAAACACAACTTCTTG	7	0	0	2	0	0	5	0	0	0.2234	0	0	0.5803	0.0744667	0.193433	1.37717	0.812567
novel-m0454-5p	22	AAGAGTGAGAATGCATGATGTG	9	5	0	0	0	2	2	0.5898	0	0	0	0.2548	0.2321	0.1966	0.1623	-0.2766	1
novel-m0455-5p	23	TGGTTAACTTAGGCTCGCTTGCA	7	4	3	0	0	0	0	0.4719	0.3566	0	0	0	0	0.276167	0.01	-4.78747	0.231565
novel-m0456-5p	22	AGCAAAAGTGACCTGACACTTC	165	25	13	40	21	34	32	2.9492	1.5454	4.4685	2.0376	4.3322	3.7137	2.9877	3.36117	0.169927	0.597813
novel-m0457-5p	22	TGGACAAAAGTCACATGACACT	79	11	18	17	14	7	12	1.2977	2.1398	1.8991	1.3584	0.8919	1.3927	1.77887	1.21433	-0.550794	0.618919
novel-m0458-3p	22	CTGGTAGCATTTGTACTGTGCT	22	0	7	2	5	3	5	0	0.8321	0.2234	0.4851	0.3823	0.5803	0.351833	0.482567	0.455836	0.740809
novel-m0459-3p	22	TGTCTAAGGGGCCCAACAGAGT	6	0	4	0	0	2	0	0	0.4755	0	0	0.2548	0	0.1585	0.0849333	-0.90008	0.909884
novel-m0460-3p	20	TGTGTTGACTGCATTATCCT	34	10	0	6	3	6	9	1.1797	0	0.6703	0.2911	0.7645	1.0445	0.616667	0.700033	0.182933	0.805214
novel-m0460-5p	23	AAAATAATACAGTCAGTACAACT	143	27	32	29	19	19	17	3.1851	3.8041	3.2397	1.8435	2.4209	1.9729	3.40963	2.0791	-0.713657	0.375228
novel-m0461-3p	22	AAAATTGTATGTGTACTGTTGA	75	14	16	13	23	0	9	1.6516	1.902	1.4523	2.2317	0	1.0445	1.66863	1.09207	-0.611606	0.697191
novel-m0462-3p	22	TACCAGACTGCACGGTTGCAGA	2608	384	355	552	466	460	391	45.2998	42.2012	61.6656	45.2155	58.6122	45.3773	49.7222	49.735	0.000371346	0.710821
novel-m0462-5p	22	TGTGAAACCGTGCAGTCTGGCA	478	70	84	82	92	68	82	8.2578	9.9856	9.1605	8.9267	8.6644	9.5165	9.13463	9.03587	-0.0156838	0.762293
novel-m0463-3p	22	GATGGAGGCACTGTGCTTCACT	7	2	3	0	0	0	2	0.2359	0.3566	0	0	0	0.2321	0.1975	0.0773667	-1.35207	0.750182
novel-m0464-3p	22	GTTGCACATGACTGTTTACAGC	54	12	8	6	8	6	14	1.4156	0.951	0.6703	0.7762	0.7645	1.6248	1.0123	1.05517	0.059834	0.832983
novel-m0464-5p	22	TGTTGTCAGTCACCTGCAGACT	115	15	19	14	25	22	20	1.7695	2.2587	1.564	2.4257	2.8032	2.3211	1.86407	2.51667	0.433061	0.342287
novel-m0465-3p	22	AAAGGCAAATCAGAGATTGAGT	7	0	2	0	2	0	3	0	0.2378	0	0.1941	0	0.3482	0.0792667	0.180767	1.18934	0.747386
novel-m0466-3p	22	CATGGCATCACATCTCAGAAGA	9	0	0	0	7	0	2	0	0	0	0.6792	0	0.2321	0.01	0.303767	4.92489	0.148064
novel-m0467-3p	24	AACCGTAGAATACCAACCCGAAGA	40	7	9	13	5	4	2	0.8258	1.0699	1.4523	0.4851	0.5097	0.2321	1.116	0.408967	-1.44828	0.115527
novel-m0468-5p	23	CAGGATATGATGCTGTGTAGTCT	57	10	4	10	13	5	15	1.1797	0.4755	1.1171	1.2614	0.6371	1.7408	0.9241	1.2131	0.392578	0.506474
novel-m0469-3p	22	CCTAGTTGGTAGCCGAGTAAGT	13	6	2	0	0	0	5	0.7078	0.2378	0	0	0	0.5803	0.3152	0.193433	-0.704431	0.831052
novel-m0470-3p	21	CGACACTGTGTAATATCGCAG	6	4	0	0	0	0	2	0.4719	0	0	0	0	0.2321	0.1573	0.0773667	-1.02373	0.910334
novel-m0471-5p	23	TTTGTGAAATTGTGACTCTCCCT	9	3	2	0	0	0	4	0.3539	0.2378	0	0	0	0.4642	0.197233	0.154733	-0.350119	1
novel-m0472-5p	21	TCACTGTTGTGTTTTTGGACT	6	0	0	4	0	0	2	0	0	0.4469	0	0	0.2321	0.148967	0.0773667	-0.945206	0.916229
novel-m0473-3p	21	AAGATAATGTGGAAGATCGGT	20	3	2	3	5	5	2	0.3539	0.2378	0.3351	0.4851	0.6371	0.2321	0.308933	0.451433	0.547217	0.67026
novel-m0473-5p	21	ATGTCCAGTCCACAACTCTGG	139	28	15	33	23	21	19	3.3031	1.7832	3.6865	2.2317	2.6758	2.205	2.92427	2.37083	-0.302681	0.863487
novel-m0474-5p	22	AAGGCTATTATTTGTTCGGGGC	6	0	3	0	0	0	3	0	0.3566	0	0	0	0.3482	0.118867	0.116067	-0.0343905	1
novel-m0475-3p	22	TTTCCACGAGCGTTGGCTGCAG	11	4	0	2	0	3	2	0.4719	0	0.2234	0	0.3823	0.2321	0.231767	0.2048	-0.178457	1
novel-m0476-3p	22	TGTGTCGTTATAACCGAGGAGT	10	0	4	2	0	0	4	0	0.4755	0.2234	0	0	0.4642	0.232967	0.154733	-0.59034	0.897982
novel-m0477-5p	22	CTACCCTGAACATGGAGGCAGT	7	0	3	0	2	2	0	0	0.3566	0	0.1941	0.2548	0	0.118867	0.149633	0.332087	1
novel-m0478-5p	24	TGTTTCAGTCTGTAGATAACAACT	689	100	97	147	112	108	125	11.7968	11.531	16.4218	10.8672	13.7611	14.5068	13.2499	13.045	-0.0224772	0.761364
novel-m0479-3p	22	TTCAACTGCTTGACCCTAAAGA	19	2	0	4	8	2	3	0.2359	0	0.4469	0.7762	0.2548	0.3482	0.2276	0.459733	1.0143	0.447111
novel-m0480-3p	22	TCACCTGCCAGTGTTAACCAGG	34	7	2	2	10	9	4	0.8258	0.2378	0.2234	0.9703	1.1468	0.4642	0.429	0.860433	1.00409	0.245831
novel-m0480-5p	22	GGGGTGACACAGACAGTGATGA	15	0	0	7	4	4	0	0	0	0.782	0.3881	0.5097	0	0.260667	0.299267	0.199225	0.916765
novel-m0481-5p	21	TTGTAGGTTGGCCTCGAGTTT	120	8	23	20	17	27	25	0.9437	2.7342	2.2343	1.6495	3.4403	2.9014	1.97073	2.66373	0.434717	0.407529
novel-m0482-3p	23	TAGATCACGATCTAGATCAGGAT	58	7	10	14	5	8	14	0.8258	1.1888	1.564	0.4851	1.0193	1.6248	1.19287	1.04307	-0.193601	1
novel-m0483-3p	21	AACGTCGGTAAACAATTACCA	6	0	0	3	0	0	3	0	0	0.3351	0	0	0.3482	0.1117	0.116067	0.0553245	1
novel-m0484-3p	21	GTGAGGACACGGAGTGAGAGG	6	0	0	0	0	6	0	0	0	0	0	0.7645	0	0.01	0.254833	4.67148	0.411326
novel-m0485-3p	21	ACGAGCGACGCCGTGGCATGA	19	4	3	4	2	2	4	0.4719	0.3566	0.4469	0.1941	0.2548	0.4642	0.425133	0.304367	-0.482105	0.767462
novel-m0486-3p	21	ACGAGCGACGCCGTGGCATGA	19	4	3	4	2	2	4	0.4719	0.3566	0.4469	0.1941	0.2548	0.4642	0.425133	0.304367	-0.482105	0.767368
novel-m0487-3p	22	GCAGAACCTTTCTTCAGTCAAA	16	0	4	2	4	2	4	0	0.4755	0.2234	0.3881	0.2548	0.4642	0.232967	0.369033	0.663628	0.663407
novel-m0487-5p	23	CGATCTGAAGTGATGGACTGACA	193	36	37	24	44	12	40	4.2469	4.3984	2.6811	4.2693	1.529	4.6422	3.77547	3.48017	-0.117499	0.94316
novel-m0488-3p	24	AGAGCAAGCAGGGAATTGGACATG	26	6	9	0	2	7	2	0.7078	1.0699	0	0.1941	0.8919	0.2321	0.592567	0.439367	-0.431552	0.857158
novel-m0489-3p	22	TTTGGGGACTTCTTGAATAACT	29	7	5	8	9	0	0	0.8258	0.5944	0.8937	0.8733	0	0	0.7713	0.2911	-1.40578	0.37218
novel-m0490-5p	21	TGCGCAAGTCAACGAAGCCGA	965	165	139	154	206	148	153	19.4648	16.5239	17.2038	19.988	18.8578	17.7563	17.7308	18.8674	0.0896327	0.580939
novel-m0491-3p	24	GGGATACCCCAGTTTTGACTGTGA	12	0	4	0	0	2	6	0	0.4755	0	0	0.2548	0.6963	0.1585	0.317033	1.00015	0.661012
novel-m0492-5p	20	GTTGACTGCGGAGACAGGAC	6	4	2	0	0	0	0	0.4719	0.2378	0	0	0	0	0.236567	0.01	-4.56417	0.307437
novel-m0493-3p	22	TTCAAGGGTTGAATGTCCAATG	10	0	5	0	0	2	3	0	0.5944	0	0	0.2548	0.3482	0.198133	0.201	0.0207239	1
novel-m0494-3p	22	TAAAGGAGACTTTCACAGCACA	38	8	5	6	11	6	2	0.9437	0.5944	0.6703	1.0673	0.7645	0.2321	0.736133	0.687967	-0.0976284	1
novel-m0495-3p	22	CTTGGACTGCTTGACCCTTCAA	17	6	2	0	7	2	0	0.7078	0.2378	0	0.6792	0.2548	0	0.3152	0.311333	-0.0178075	1
novel-m0496-5p	24	ATTTGTAGGATGACAAATGGTGCC	61	15	14	14	8	2	8	1.7695	1.6643	1.564	0.7762	0.2548	0.9284	1.66593	0.653133	-1.35088	0.139648
novel-m0497-3p	24	GAGGATCCTGTGGCGTTGATCACT	18	4	2	0	2	5	5	0.4719	0.2378	0	0.1941	0.6371	0.5803	0.236567	0.4705	0.991948	0.448221
novel-m0498-5p	20	TGATGTTATGCTGTGTCACT	508	104	71	79	96	89	69	12.2687	8.4402	8.8253	9.3148	11.3402	8.0078	9.84473	9.55427	-0.043207	0.825592
novel-m0499-5p	24	ATAAGGTACCAGTTACTTTGCGCT	62	13	9	15	8	8	9	1.5336	1.0699	1.6757	0.7762	1.0193	1.0445	1.4264	0.946667	-0.59145	0.5876
novel-m0500-3p	22	TGTGCGCTGTAGTGTAACACAG	7	3	0	2	0	0	2	0.3539	0	0.2234	0	0	0.2321	0.192433	0.0773667	-1.31457	0.753939
novel-m0500-5p	22	TTACACTACAGCGCACACTCTG	20	3	3	6	0	0	8	0.3539	0.3566	0.6703	0	0	0.9284	0.460267	0.309467	-0.572686	0.922289
novel-m0501-5p	22	TTACACTACAGCGCACACTCTG	20	3	3	6	0	0	8	0.3539	0.3566	0.6703	0	0	0.9284	0.460267	0.309467	-0.572686	0.922201
novel-m0502-5p	24	TCAGCCGAGAATTGCTCTTGTACG	302	39	59	40	33	52	79	4.6008	7.0137	4.4685	3.202	6.6257	9.1683	5.361	6.332	0.240159	0.504098
novel-m0503-5p	20	CTGAGACGTCGTGATCAGCT	7	2	0	3	0	0	2	0.2359	0	0.3351	0	0	0.2321	0.190333	0.0773667	-1.29874	0.754533
novel-m0504-3p	22	TCCGTTATAACCGAGGTTGACT	63	8	12	5	16	9	13	0.9437	1.4265	0.5586	1.5525	1.1468	1.5087	0.976267	1.40267	0.522825	0.368735
novel-m0505-3p	22	AAGATGGGACTGATATGTTGTC	148	29	9	24	27	18	41	3.4211	1.0699	2.6811	2.6198	2.2935	4.7582	2.3907	3.22383	0.431344	0.368474
novel-m0506-5p	21	TGGGACATCCCAGGTATCAGG	7	2	0	0	0	5	0	0.2359	0	0	0	0.6371	0	0.0786333	0.212367	1.43334	0.752997
novel-m0507-3p	22	TTAGCTTCTCAAGAAGGGCTCT	6	3	0	3	0	0	0	0.3539	0	0.3351	0	0	0	0.229667	0.01	-4.52147	0.307772
novel-m0508-5p	21	AGGAGGTTGCCGCCTGTATCT	15	2	2	3	0	6	2	0.2359	0.2378	0.3351	0	0.7645	0.2321	0.2696	0.3322	0.301232	0.894512
novel-m0509-3p	21	TAGACCCAAACTCCAGATCAG	96	21	15	13	11	16	20	2.4773	1.7832	1.4523	1.0673	2.0387	2.3211	1.90427	1.80903	-0.0740165	0.92836
novel-m0510-3p	20	TCTGCTGGACTGCGTGGACT	17	0	3	7	3	2	2	0	0.3566	0.782	0.2911	0.2548	0.2321	0.379533	0.259333	-0.549419	0.889412
novel-m0511-3p	21	TGGTCTGGGCGTTGACGCAGA	8	0	0	2	2	2	2	0	0	0.2234	0.1941	0.2548	0.2321	0.0744667	0.227	1.60803	0.556119
novel-m0512-3p	21	TGAGGATGGTCTTATTACAGG	53	13	6	8	9	7	10	1.5336	0.7133	0.8937	0.8733	0.8919	1.1605	1.04687	0.975233	-0.102258	1
novel-m0513-3p	21	TTTTACTGTGTCCGCACCTGA	9	2	3	0	2	2	0	0.2359	0.3566	0	0.1941	0.2548	0	0.1975	0.149633	-0.400421	1
novel-m0514-5p	21	AAGGTACCTGGGCTGTGTTAC	8	0	0	0	0	5	3	0	0	0	0	0.6371	0.3482	0.01	0.328433	5.03753	0.156185
novel-m0515-3p	22	TACCGACCAGCCGTAACACACC	33	4	7	9	3	5	5	0.4719	0.8321	1.0054	0.2911	0.6371	0.5803	0.7698	0.502833	-0.614403	0.667067
novel-m0516-5p	22	TGATACCAGGAATGAACTGACT	6	0	0	0	2	0	4	0	0	0	0.1941	0	0.4642	0.01	0.219433	4.45571	0.284278
novel-m0517-5p	22	TGAATGCCTTATTACACACATC	155	24	17	8	44	36	26	2.8312	2.0209	0.8937	4.2693	4.587	3.0174	1.91527	3.9579	1.04719	0.0647701
novel-m0518-3p	22	TCCGTTATAACCGAGGTTGACT	63	8	12	5	16	9	13	0.9437	1.4265	0.5586	1.5525	1.1468	1.5087	0.976267	1.40267	0.522825	0.370887
novel-m0519-3p	22	TCCGTTATAACCGAGGTTGACT	63	8	12	5	16	9	13	0.9437	1.4265	0.5586	1.5525	1.1468	1.5087	0.976267	1.40267	0.522825	0.36936
novel-m0520-5p	23	TTAACTTGACATTCGGCAGTGAG	168	15	29	27	36	26	35	1.7695	3.4474	3.0163	3.493	3.3129	4.0619	2.7444	3.6226	0.400535	0.346477
novel-m0521-5p	23	TTAACTTGACATTCGGCAGTGAG	168	15	29	27	36	26	35	1.7695	3.4474	3.0163	3.493	3.3129	4.0619	2.7444	3.6226	0.400535	0.345354
novel-m0522-3p	22	TGCACTGCCAAGAACTTGGCTG	6	4	0	0	0	2	0	0.4719	0	0	0	0.2548	0	0.1573	0.0849333	-0.889116	0.91149
novel-m0523-5p	21	ATGTGACACCATGTAGTTTGG	458	66	91	51	98	64	88	7.7859	10.8178	5.6974	9.5088	8.1547	10.2128	8.10037	9.2921	0.198017	0.486246
novel-m0524-5p	21	ATGTGACGAAGTGTCGTCTGG	135	22	15	25	20	30	23	2.5953	1.7832	2.7928	1.9406	3.8225	2.6693	2.39043	2.8108	0.233709	0.553854
novel-m0525-5p	21	TGTGAAGCCATGTAGTTTAGT	87	15	16	13	19	5	19	1.7695	1.902	1.4523	1.8435	0.6371	2.205	1.70793	1.56187	-0.12898	0.962428
novel-m0526-3p	22	ACCCTGAAGATGAAGGCACTGT	10	2	0	5	0	0	3	0.2359	0	0.5586	0	0	0.3482	0.264833	0.116067	-1.19013	0.773416
novel-m0527-3p	24	TGTCCTTTGAATCATCACCTTTCT	37	8	5	12	0	6	6	0.9437	0.5944	1.3406	0	0.7645	0.6963	0.959567	0.486933	-0.978659	0.406356
novel-m0528-5p	21	ATGTGACACCATGTAGTTTGG	432	60	80	47	98	64	83	7.0781	9.5101	5.2505	9.5088	8.1547	9.6325	7.27957	9.09867	0.321803	0.357062
novel-m0529-5p	22	TGGGATGTGACACTCTGTCATT	6	0	0	3	3	0	0	0	0	0.3351	0.2911	0	0	0.1117	0.0970333	-0.203077	1
novel-m0530-5p	22	TGCAACAACCAACTCATGCACT	449	51	74	94	92	73	65	6.0164	8.7969	10.501	8.9267	9.3015	7.5435	8.4381	8.59057	0.0258351	0.709119
novel-m0531-3p	23	TACACCAGTCACAGTTCCTGCGC	19	2	2	2	5	2	6	0.2359	0.2378	0.2234	0.4851	0.2548	0.6963	0.232367	0.478733	1.04282	0.378616
novel-m0532-3p	22	TAAGAATAAGTTCTGAAGATGG	56	15	10	10	0	13	8	1.7695	1.1888	1.1171	0	1.6564	0.9284	1.35847	0.8616	-0.656889	0.590347
novel-m0533-3p	22	GGGTCGAAACATGTAGGAGTGT	45	13	8	8	4	6	6	1.5336	0.951	0.8937	0.3881	0.7645	0.6963	1.1261	0.6163	-0.86963	0.391884
novel-m0534-3p	21	AAGATGGTACTGAGATGTTGT	148	20	24	24	32	23	25	2.3594	2.853	2.6811	3.1049	2.9306	2.9014	2.63117	2.97897	0.179109	0.557908
novel-m0535-3p	22	TATATGTGTCTGTCGGGTGGAG	8	2	4	0	0	2	0	0.2359	0.4755	0	0	0.2548	0	0.237133	0.0849333	-1.4813	0.654642
novel-m0536-3p	21	CATCTGCTGACTGTATATGCC	212	41	32	38	36	30	35	4.8367	3.8041	4.2451	3.493	3.8225	4.0619	4.2953	3.79247	-0.179622	1
novel-m0537-3p	21	TGCAACGGCGCTCCAGTCAGT	60	12	12	9	5	12	10	1.4156	1.4265	1.0054	0.4851	1.529	1.1605	1.2825	1.0582	-0.277347	0.898879
novel-m0538-5p	21	ATTCCACTGGTGCTGATTGTG	12	2	0	3	2	3	2	0.2359	0	0.3351	0.1941	0.3823	0.2321	0.190333	0.2695	0.501757	0.861895
novel-m0539-3p	22	TGTGTCGTTATAACCGAGGAGT	10	0	4	2	0	0	4	0	0.4755	0.2234	0	0	0.4642	0.232967	0.154733	-0.59034	0.897697
novel-m0540-5p	22	TTCTGGGATATTTTGCAGCATC	20	2	4	4	2	0	8	0.2359	0.4755	0.4469	0.1941	0	0.9284	0.3861	0.374167	-0.0452935	1
novel-m0541-5p	22	TTCGGCCACACGCAGCGTAACT	19	0	2	5	9	3	0	0	0.2378	0.5586	0.8733	0.3823	0	0.265467	0.418533	0.656812	0.592585
novel-m0542-3p	22	ATTTTGGAGGAACATGCTGTCT	84	24	7	16	14	17	6	2.8312	0.8321	1.7874	1.3584	2.1661	0.6963	1.8169	1.40693	-0.368925	0.818311
novel-m0543-5p	23	ACGGGCTGATGGCTGTGTCAGTT	34	0	12	7	7	4	4	0	1.4265	0.782	0.6792	0.5097	0.4642	0.736167	0.551033	-0.417893	0.864834
novel-m0544-3p	20	AATATCAGGAACTGATTACT	10	3	3	4	0	0	0	0.3539	0.3566	0.4469	0	0	0	0.3858	0.01	-5.26978	0.0392552
novel-m0545-5p	22	CCAGGCCTGTAGTGGGACTGCT	7	0	0	4	0	3	0	0	0	0.4469	0	0.3823	0	0.148967	0.127433	-0.225247	1
novel-m0546-5p	21	CCGAAGCTCAAAGAACCCCTT	41	6	14	6	2	6	7	0.7078	1.6643	0.6703	0.1941	0.7645	0.8124	1.01413	0.590333	-0.780646	0.498339
novel-m0547-3p	23	TGTCAGTACCAGACTGTCGTTCT	95	19	9	22	16	14	15	2.2414	1.0699	2.4577	1.5525	1.7839	1.7408	1.923	1.6924	-0.184288	1
novel-m0548-3p	21	TTGATCCTTGCAGATGAAGAC	72	11	15	5	9	14	18	1.2977	1.7832	0.5586	0.8733	1.7839	2.089	1.21317	1.58207	0.383033	0.490609
novel-m0549-3p	22	TGAAGTATAACCAGTATGAGAC	9	4	2	3	0	0	0	0.4719	0.2378	0.3351	0	0	0	0.348267	0.01	-5.12212	0.067156
novel-m0549-5p	23	TCAACATGCTGGTTCTGCTAGTC	67	15	12	20	4	6	10	1.7695	1.4265	2.2343	0.3881	0.7645	1.1605	1.8101	0.771033	-1.2312	0.15453
novel-m0550-3p	21	TGTTTGATGATTGTTTTCACA	6	3	0	0	3	0	0	0.3539	0	0	0.2911	0	0	0.117967	0.0970333	-0.281827	1
novel-m0551-3p	22	TCATGTGACTATGACGTGGCGC	11	2	0	2	0	3	4	0.2359	0	0.2234	0	0.3823	0.4642	0.1531	0.282167	0.882073	0.668693
novel-m0552-3p	22	TCATGTGACTATGACGTGGCGC	11	2	0	2	0	3	4	0.2359	0	0.2234	0	0.3823	0.4642	0.1531	0.282167	0.882073	0.667638
novel-m0553-5p	23	TTTTTAGCCCAGACTGAGGCTCT	29	17	8	0	2	2	0	2.0055	0.951	0	0.1941	0.2548	0	0.9855	0.149633	-2.71942	0.0747911
novel-m0554-3p	22	TCCTTGCACCGCTTGACCCTGA	45	6	6	9	9	7	8	0.7078	0.7133	1.0054	0.8733	0.8919	0.9284	0.808833	0.897867	0.150659	0.722265
novel-m0555-3p	21	TGACTGCGGTACATAGAAACA	11	3	3	0	0	2	3	0.3539	0.3566	0	0	0.2548	0.3482	0.236833	0.201	-0.236677	1
novel-m0556-3p	23	CCACAATGTGTTGTACCCCAGAA	12	0	3	0	4	0	5	0	0.3566	0	0.3881	0	0.5803	0.118867	0.3228	1.4413	0.521943
novel-m0557-5p	21	TTTCAGGACAATTGTTCTACC	16	11	3	0	0	2	0	1.2977	0.3566	0	0	0.2548	0	0.551433	0.0849333	-2.69878	0.198403
novel-m0558-3p	24	GAAAGTCGTAATGTAGTTCTTCCT	8	0	0	3	0	0	5	0	0	0.3351	0	0	0.5803	0.1117	0.193433	0.792207	0.915147
novel-m0559-5p	21	TGGGATGTGACACTGTGTTGT	51	10	7	5	14	5	10	1.1797	0.8321	0.5586	1.3584	0.6371	1.1605	0.8568	1.052	0.296104	0.555126
novel-m0560-3p	20	AGCGTCTCTGGAACTGCTCC	83	22	12	13	9	15	12	2.5953	1.4265	1.4523	0.8733	1.9113	1.3927	1.8247	1.39243	-0.390051	0.76332
novel-m0561-3p	20	AGCGTCTCTGGAACTGCTCC	83	22	12	13	9	15	12	2.5953	1.4265	1.4523	0.8733	1.9113	1.3927	1.8247	1.39243	-0.390051	0.762772
novel-m0562-5p	20	CTGTGGAACCACAAATTTCA	52	5	7	8	15	9	8	0.5898	0.8321	0.8937	1.4554	1.1468	0.9284	0.771867	1.17687	0.608527	0.314277
novel-m0563-3p	21	ACTGTCTCGACTGCTGAGATC	101	32	30	4	13	16	6	3.775	3.5663	0.4469	1.2614	2.0387	0.6963	2.59607	1.33213	-0.962589	0.343069
novel-m0564-3p	22	TATCACATCGCACCAGACCTGA	6	2	2	0	2	0	0	0.2359	0.2378	0	0.1941	0	0	0.1579	0.0647	-1.28717	0.866526
novel-m0565-3p	22	AGAGACGCTGGTACCTGTCTAC	17	2	0	8	3	2	2	0.2359	0	0.8937	0.2911	0.2548	0.2321	0.376533	0.259333	-0.53797	0.893238
novel-m0566-3p	22	CTGGCATTATTAGCAGCTCACC	25	4	5	6	5	2	3	0.4719	0.5944	0.6703	0.4851	0.2548	0.3482	0.578867	0.3627	-0.674454	0.689424
novel-m0567-3p	23	CCGACTCCGACTCCGACCTCAGT	18	2	5	8	3	0	0	0.2359	0.5944	0.8937	0.2911	0	0	0.574667	0.0970333	-2.56617	0.172736
novel-m0568-5p	22	TAGGAACTGAACCGGTCGAGGT	7	0	0	3	2	0	2	0	0	0.3351	0.1941	0	0.2321	0.1117	0.142067	0.346939	1
novel-m0569-3p	22	TACAACATAGGACAGCCTGAGT	6	0	0	2	2	2	0	0	0	0.2234	0.1941	0.2548	0	0.0744667	0.149633	1.00676	0.867735
novel-m0570-5p	21	TGGGATGTGACACTGTGTTGT	28	5	7	2	7	5	2	0.5898	0.8321	0.2234	0.6792	0.6371	0.2321	0.548433	0.516133	-0.0875725	1
novel-m0571-5p	23	TTCGACGCAGGAATGCTTGACCT	3332	671	460	730	338	679	454	79.1568	54.6833	81.5505	32.7958	86.5167	52.6888	71.7969	57.3338	-0.324536	0.732732
novel-m0572-5p	20	ATGCGCTGATGTGTGATCAG	9	3	0	0	6	0	0	0.3539	0	0	0.5822	0	0	0.117967	0.194067	0.718173	0.836003
novel-m0573-3p	22	TGATCACACATCAGCGCAATCG	994	153	186	128	267	113	147	18.0492	22.1111	14.2993	25.9067	14.3982	17.06	18.1532	19.1216	0.0749819	0.624835
novel-m0573-5p	21	AATGCGCTGATGTGTGATCAG	16956	2855	2712	3055	2959	2818	2557	336.8	322.394	341.283	287.108	359.064	296.752	333.492	314.308	-0.0854745	0.848677
novel-m0574-3p	22	ATTGTCTGTAGTTTTCAGCTCT	12	8	4	0	0	0	0	0.9437	0.4755	0	0	0	0	0.473067	0.01	-5.56397	0.0652695
novel-m0575-3p	22	CTGGCATTATTGGCGGCTCACC	6	0	0	0	2	2	2	0	0	0	0.1941	0.2548	0.2321	0.01	0.227	4.50462	0.160675
novel-m0576-3p	22	CACCATGACAATGGAGATGTCA	33	6	4	10	3	0	10	0.7078	0.4755	1.1171	0.2911	0	1.1605	0.7668	0.483867	-0.664241	0.738127
novel-m0577-3p	23	CTTGACCCTTGAAGATGGGACCT	21	6	0	8	5	0	2	0.7078	0	0.8937	0.4851	0	0.2321	0.533833	0.239067	-1.15898	0.607971
novel-m0578-5p	23	TGACGCAGCTACTAGCCAGAGAA	289	35	39	45	92	30	48	4.1289	4.6362	5.0271	8.9267	3.8225	5.5706	4.5974	6.1066	0.409551	0.306055
novel-m0579-3p	22	TACATCTGAGCCAATTTTTCTT	66	10	10	3	19	12	12	1.1797	1.1888	0.3351	1.8435	1.529	1.3927	0.9012	1.5884	0.817655	0.205647
novel-m0580-5p	22	AGCTGAGTCTGAGCAGCTCCGA	61	6	12	8	5	11	19	0.7078	1.4265	0.8937	0.4851	1.4016	2.205	1.00933	1.3639	0.434335	0.484279
novel-m0581-5p	22	TGGGCCTGAATCCTTGCTCAGC	199	33	20	49	44	27	26	3.893	2.3775	5.4739	4.2693	3.4403	3.0174	3.9148	3.57567	-0.130726	0.939804
novel-m0582-3p	23	GTGAGCAAAGTTTCAGGTGTGTG	6	0	0	2	2	0	2	0	0	0.2234	0.1941	0	0.2321	0.0744667	0.142067	0.931901	0.866309
novel-m0582-5p	22	CGCCTGATACTTGCTTCAACCT	1685	241	204	244	402	286	308	28.4304	24.2508	27.258	39.0056	36.4415	35.7448	26.6464	37.064	0.476077	0.150602
novel-m0583-3p	23	GGTTCGGTCAGCAGTGCATGAGT	6	0	0	4	2	0	0	0	0	0.4469	0.1941	0	0	0.148967	0.0647	-1.20315	0.916582
novel-m0584-5p	22	ATTTTGAAGGAACGTCTTGACT	26	9	6	6	3	2	0	1.0617	0.7133	0.6703	0.2911	0.2548	0	0.8151	0.181967	-2.1633	0.0772276
novel-m0585-3p	24	CTTTAGCGTCTACGTTCTGAAGCC	14	7	2	0	3	2	0	0.8258	0.2378	0	0.2911	0.2548	0	0.354533	0.181967	-0.962247	0.710047
novel-m0586-3p	23	AAGGATGATGGTGCCACTCTTCT	11	3	0	3	5	0	0	0.3539	0	0.3351	0.4851	0	0	0.229667	0.1617	-0.506222	1
novel-m0587-5p	23	TATGACCAGCAGAACTGGGCCCT	6	3	3	0	0	0	0	0.3539	0.3566	0	0	0	0	0.236833	0.01	-4.5658	0.298946
novel-m0588-3p	22	TGCGCGGCGGCTGTTTAGCGTA	34	0	8	12	3	7	4	0	0.951	1.3406	0.2911	0.8919	0.4642	0.763867	0.549067	-0.47634	0.807231
novel-m0589-3p	20	CGCTGGGTAGCTATGTCTGG	8	0	0	0	0	8	0	0	0	0	0	1.0193	0	0.01	0.339767	5.08647	0.281271
novel-m0590-3p	20	TTGATACTGTGTAATATCCC	17	0	5	3	0	3	6	0	0.5944	0.3351	0	0.3823	0.6963	0.309833	0.359533	0.214633	0.915491
novel-m0591-3p	21	TTGACACTGCATAATATCCCT	9	2	0	5	0	0	2	0.2359	0	0.5586	0	0	0.2321	0.264833	0.0773667	-1.7753	0.643073
novel-m0592-3p	20	TCCCAGAAGACAGTATTCTT	15	7	0	0	6	0	2	0.8258	0	0	0.5822	0	0.2321	0.275267	0.271433	-0.020232	1
novel-m0593-3p	22	TAACACTGATGATGAAGGCACT	27	0	8	2	8	2	7	0	0.951	0.2234	0.7762	0.2548	0.8124	0.391467	0.614467	0.650445	0.573481
novel-m0594-3p	23	CCACCAATGAACGCTGCTGAACT	7	0	0	0	3	0	4	0	0	0	0.2911	0	0.4642	0.01	0.251767	4.65402	0.22026
novel-m0595-3p	22	CAAATAATGGGAATATCCTTGC	52	8	7	9	13	8	7	0.9437	0.8321	1.0054	1.2614	1.0193	0.8124	0.927067	1.03103	0.153346	0.698864
novel-m0595-5p	23	AGGCGATTCGAATTATTTGTGGT	11	3	2	0	4	0	2	0.3539	0.2378	0	0.3881	0	0.2321	0.197233	0.206733	0.0678676	1
novel-m0596-3p	21	AAGATGGTACTGAGATGTTGT	148	20	24	24	32	23	25	2.3594	2.853	2.6811	3.1049	2.9306	2.9014	2.63117	2.97897	0.179109	0.557409
novel-m0597-5p	24	CAGCGGCACAGTGTGGACGCGACT	287	0	60	145	0	82	0	0	7.1326	16.1984	0	10.4483	0	7.777	3.48277	-1.15898	0.55366
novel-m0598-3p	21	AATGCCTTATTACACACATCA	7	2	0	0	5	0	0	0.2359	0	0	0.4851	0	0	0.0786333	0.1617	1.04011	0.819732
novel-m0599-3p	22	TAACGGACGGTGGTAAGGCGTC	6	0	0	0	0	4	2	0	0	0	0	0.5097	0.2321	0.01	0.247267	4.628	0.263759
novel-m0600-3p	22	AATGGAGGCATTAGGTTCTTGT	17	2	0	0	6	6	3	0.2359	0	0	0.5822	0.7645	0.3482	0.0786333	0.564967	2.84495	0.054967
novel-m0601-5p	22	TTTCCATTGTCAGATGCTGATA	411	79	68	95	63	56	50	9.3195	8.0836	10.6127	6.1128	7.1354	5.8027	9.3386	6.3503	-0.556382	0.439795
novel-m0602-3p	22	CTCAGGCACTAGTGGCTCTGCT	29	2	10	10	0	5	2	0.2359	1.1888	1.1171	0	0.6371	0.2321	0.847267	0.289733	-1.54809	0.249616
novel-m0603-3p	21	CATGGTAGCTGCCTTCCGAGA	10	0	0	3	2	0	5	0	0	0.3351	0.1941	0	0.5803	0.1117	0.258133	1.20849	0.685772
novel-m0604-3p	23	TCCAGTCGATGTTGGCGACGATG	6	0	3	0	0	0	3	0	0.3566	0	0	0	0.3482	0.118867	0.116067	-0.0343905	1
novel-m0605-5p	22	TGAGCAAGTCAGTTGCGGAACT	6	4	0	2	0	0	0	0.4719	0	0.2234	0	0	0	0.231767	0.01	-4.5346	0.316533
novel-m0606-5p	24	TGCTAATTGAATCGTTCTTCCAGG	7	5	0	2	0	0	0	0.5898	0	0.2234	0	0	0	0.271067	0.01	-4.76058	0.253501
novel-m0607-3p	21	CGACACTGCATAATATCCCAG	7	0	0	2	3	0	2	0	0	0.2234	0.2911	0	0.2321	0.0744667	0.1744	1.22773	0.748985
novel-m0607-5p	22	TGGGATATTACGCAGCATCATG	11	0	4	0	0	3	4	0	0.4755	0	0	0.3823	0.4642	0.1585	0.282167	0.832065	0.725299
novel-m0608-3p	22	CGAAGGTGTCCTAAGTTGAGCT	35	0	0	0	0	35	0	0	0	0	0	4.4596	0	0.01	1.48653	7.21581	0.00864547
novel-m0609-5p	23	GGCCTCTGGTCGCGGCGTCCGGG	9	0	0	0	0	9	0	0	0	0	0	1.1468	0	0.01	0.382267	5.25651	0.220321
novel-m0610-3p	24	CGGGACCGCGGAGAGTTCACGCCT	180	37	26	43	29	17	28	4.3648	3.0908	4.8037	2.8138	2.1661	3.2495	4.08643	2.74313	-0.575017	0.518817
novel-m0611-5p	22	TTTTGTCAAACCGTGTATGGTT	6	0	0	3	0	0	3	0	0	0.3351	0	0	0.3482	0.1117	0.116067	0.0553245	1
novel-m0612-3p	24	TTTGTGGTTTGGTACAACCACCCT	16	2	3	0	3	3	5	0.2359	0.3566	0	0.2911	0.3823	0.5803	0.1975	0.4179	1.08131	0.386012
novel-m0613-5p	24	GCAGTCTGAAAGGGAAGTGGCACC	41	4	5	11	0	5	16	0.4719	0.5944	1.2288	0	0.6371	1.8569	0.765033	0.831333	0.119904	0.845089
novel-m0614-3p	23	TCAAGTTGAGATTGCAGCTGAGA	500	105	81	89	78	66	81	12.3867	9.629	9.9425	7.5683	8.4096	9.4004	10.6527	8.45943	-0.332591	0.737224
novel-m0615-5p	24	TGGGACAGCTCTGTGGTGCCGAGC	100	16	19	18	15	18	14	1.8875	2.2587	2.0108	1.4554	2.2935	1.6248	2.05233	1.79123	-0.196312	0.963278
novel-m0616-5p	22	GATCCCAGCGGCCGCGCGGTCT	14	4	0	8	2	0	0	0.4719	0	0.8937	0.1941	0	0	0.4552	0.0647	-2.81466	0.292456
novel-m0617-3p	24	TGATTGGCTGAAGAACGATAGTGT	2854	429	507	537	541	377	463	50.6084	60.2705	59.9899	52.4926	48.0365	53.7333	56.9563	51.4208	-0.147503	0.961039
novel-m0618-3p	22	AAGGAAGCAGTATGATCCTTCA	6	2	0	0	0	4	0	0.2359	0	0	0	0.5097	0	0.0786333	0.1699	1.11147	0.838052
novel-m0618-5p	22	TGAAGGATCGTAATGACTTCTT	50	7	6	13	8	7	9	0.8258	0.7133	1.4523	0.7762	0.8919	1.0445	0.997133	0.9042	-0.141145	1
novel-m0619-5p	22	GTTTCTCCAGCTGTGCTCAGAC	6	2	2	0	0	2	0	0.2359	0.2378	0	0	0.2548	0	0.1579	0.0849333	-0.894608	0.866536
novel-m0620-5p	22	ACTGATACCTTTCTGCCAGACT	30	2	4	4	5	5	10	0.2359	0.4755	0.4469	0.4851	0.6371	1.1605	0.3861	0.7609	0.978732	0.208856
novel-m0621-5p	20	GAGGGCTGGGCGGTCGGGCC	6	2	0	0	2	2	0	0.2359	0	0	0.1941	0.2548	0	0.0786333	0.149633	0.928219	0.865608
novel-m0622-3p	20	CTTCGAACAATGGCAGAACC	8	0	0	3	3	2	0	0	0	0.3351	0.2911	0.2548	0	0.1117	0.181967	0.704045	0.888678
novel-m0623-5p	22	TTGCAAATGGCGATGATTGAGA	23	8	0	5	8	0	2	0.9437	0	0.5586	0.7762	0	0.2321	0.500767	0.3361	-0.575248	0.926772
novel-m0624-5p	23	TCATCTTCAGGGTATGTCAGGCC	149	24	26	20	31	16	32	2.8312	3.0908	2.2343	3.0079	2.0387	3.7137	2.71877	2.9201	0.103065	0.646335
novel-m0625-5p	23	CAGTGGTGCATGCTGTGAAGACT	11	2	0	2	0	3	4	0.2359	0	0.2234	0	0.3823	0.4642	0.1531	0.282167	0.882073	0.669465
novel-m0626-3p	22	AGCACTTGGAACGTTGGAGAAA	22	7	2	0	6	5	2	0.8258	0.2378	0	0.5822	0.6371	0.2321	0.354533	0.4838	0.448489	0.742265
novel-m0627-5p	22	TCTGCATATGGAGTTAACCTTG	9	0	2	2	2	3	0	0	0.2378	0.2234	0.1941	0.3823	0	0.153733	0.192133	0.321678	1
novel-m0628-5p	22	CCTGTGACATGATGCTGTGTAC	42	15	7	8	5	2	5	1.7695	0.8321	0.8937	0.4851	0.2548	0.5803	1.1651	0.440067	-1.40466	0.139376
novel-m0629-5p	23	CTCAAGGCTCAAGTGGACCAAGA	11	3	2	2	2	2	0	0.3539	0.2378	0.2234	0.1941	0.2548	0	0.2717	0.149633	-0.860583	0.7148
novel-m0630-3p	20	TCATAACCCTGAGGATGAAG	817	128	133	140	147	135	134	15.0999	15.8106	15.6398	14.2632	17.2014	15.5513	15.5168	15.672	0.0143583	0.704025
novel-m0630-5p	23	CCTTCATCTCCTGGGTTAGTAGT	9	0	0	0	3	4	2	0	0	0	0.2911	0.5097	0.2321	0.01	0.3443	5.10559	0.0588886
novel-m0631-5p	21	ACCTGCCTGCAGATTCGGCTC	7	0	3	0	0	4	0	0	0.3566	0	0	0.5097	0	0.118867	0.1699	0.515342	0.920761
novel-m0632-3p	23	AAGACTGTGCATCTGTTTGTACA	39	9	4	9	2	7	8	1.0617	0.4755	1.0054	0.1941	0.8919	0.9284	0.847533	0.671467	-0.335954	0.860537
novel-m0633-3p	23	ACGAAGGCAGCAGGTTCCTCTAA	8	2	2	0	0	0	4	0.2359	0.2378	0	0	0	0.4642	0.1579	0.154733	-0.0292271	1
novel-m0634-3p	23	GAGCGCTTGCTGGGATCGTGAGT	160	27	15	34	30	27	27	3.1851	1.7832	3.7982	2.9109	3.4403	3.1335	2.92217	3.16157	0.113601	0.6414
novel-m0634-5p	21	ATCCCAGTGGCCGCGCGGTCT	245	40	28	60	37	44	36	4.7187	3.3285	6.7028	3.5901	5.6064	4.178	4.91667	4.45817	-0.14123	0.983253
novel-m0635-3p	23	AGACTGTCCTCAAAATGCACAGA	19	4	4	2	3	2	4	0.4719	0.4755	0.2234	0.2911	0.2548	0.4642	0.390267	0.3367	-0.212997	1
novel-m0636-5p	22	GATCCCAGCGGCCGCGCGGTCT	14	4	0	8	2	0	0	0.4719	0	0.8937	0.1941	0	0	0.4552	0.0647	-2.81466	0.291073
novel-m0637-5p	23	ATTTCGGAGTGACGTACCGTCGT	7	2	0	0	2	0	3	0.2359	0	0	0.1941	0	0.3482	0.0786333	0.180767	1.20092	0.747556
novel-m0638-5p	21	AAACCAGCTGCACGTGTAATC	14	5	0	6	3	0	0	0.5898	0	0.6703	0.2911	0	0	0.420033	0.0970333	-2.11395	0.458066
novel-m0639-5p	22	ATGATCAAGCTGTTCGCTGGCT	11	5	0	0	4	0	2	0.5898	0	0	0.3881	0	0.2321	0.1966	0.206733	0.0725077	1
novel-m0640-5p	20	TGAGATGTGACACCATGTAG	15	0	5	4	2	0	4	0	0.5944	0.4469	0.1941	0	0.4642	0.3471	0.219433	-0.661569	0.806843
novel-m0641-3p	20	TTCAAATGTCGGGGACCACT	7	0	2	0	2	3	0	0	0.2378	0	0.1941	0.3823	0	0.0792667	0.192133	1.27732	0.748257
novel-m0642-5p	22	ATTGCACAGGGGGACGCTCTAG	6	0	0	0	0	6	0	0	0	0	0	0.7645	0	0.01	0.254833	4.67148	0.415208
novel-m0643-5p	22	AGTTGTTAACATGGCATTCTCT	714	104	110	148	134	103	115	12.2687	13.0764	16.5335	13.0019	13.124	13.3463	13.9595	13.1574	-0.0853763	0.860524
novel-m0644-3p	21	ACCGACGTTTCAGAGGAACCT	10	0	8	0	0	0	2	0	0.951	0	0	0	0.2321	0.317	0.0773667	-2.0347	0.582523
novel-m0645-3p	21	TCACCGGGAAGGATAATTCGT	2336	357	402	426	437	297	417	42.1147	47.7884	47.5898	42.4016	37.8431	48.3947	45.831	42.8798	-0.0960245	0.867451
novel-m0646-3p	20	TTGGTCCCTTGAAGATGAAG	7	0	0	3	2	2	0	0	0	0.3351	0.1941	0.2548	0	0.1117	0.149633	0.421802	1
novel-m0647-5p	21	AAGGATCCTGTAAATTTGAAA	25	0	0	0	0	25	0	0	0	0	0	3.1854	0	0.01	1.0618	6.73037	0.0208577
novel-m0648-3p	26	TCGCACTGTAGGACTATCATGATGTG	10	0	2	3	5	0	0	0	0.2378	0.3351	0.4851	0	0	0.190967	0.1617	-0.240001	1
novel-m0648-5p	24	TGATGGAGGTAATTCATAGTTTCT	10	3	3	0	4	0	0	0.3539	0.3566	0	0.3881	0	0	0.236833	0.129367	-0.872406	0.895201
novel-m0649-3p	21	CCTGTATATGGTCACTCTCCT	32869	6142	5249	5953	6165	4609	4751	724.562	623.984	665.028	598.183	587.269	551.375	671.191	578.942	-0.213303	0.906948
novel-m0649-5p	24	AGGAGATTAGCCATATCCATAGTG	35	6	6	4	11	5	3	0.7078	0.7133	0.4469	1.0673	0.6371	0.3482	0.622667	0.6842	0.135958	0.758222
novel-m0650-3p	23	TCATATCGCAGTAGTCCAACAGA	219	31	34	34	35	39	46	3.657	4.0418	3.7982	3.396	4.9693	5.3385	3.83233	4.56793	0.253319	0.472722
novel-m0650-5p	22	TTGGACTAATGTCAGTGACATT	5023	838	860	1028	683	882	732	98.8575	102.234	114.841	66.2707	112.383	84.9519	105.311	87.8684	-0.261237	0.819455
novel-m0651-3p	22	TTGCACTCATGCCACAGCCACT	7	3	2	0	0	0	2	0.3539	0.2378	0	0	0	0.2321	0.197233	0.0773667	-1.35012	0.751009
novel-m0652-3p	21	TACCTCTGCCAGACTACATGG	144	35	19	21	33	20	16	4.1289	2.2587	2.346	3.202	2.5484	1.8569	2.9112	2.53577	-0.199192	1
novel-m0653-3p	20	TTCCACAGTAACTGCGTACA	14	5	2	3	0	4	0	0.5898	0.2378	0.3351	0	0.5097	0	0.387567	0.1699	-1.18976	0.505237
novel-m0654-3p	24	TGCATGTGCCACCAATCCTTGTCT	27	8	4	8	2	2	3	0.9437	0.4755	0.8937	0.1941	0.2548	0.3482	0.770967	0.2657	-1.53687	0.162825
novel-m0655-5p	23	TCCCAGGATACTCTGAATGAAGA	19	2	6	2	2	5	2	0.2359	0.7133	0.2234	0.1941	0.6371	0.2321	0.390867	0.354433	-0.141162	1
novel-m0656-3p	21	TCTGAAACCGTCGTTATGCTT	14	6	0	4	2	0	2	0.7078	0	0.4469	0.1941	0	0.2321	0.3849	0.142067	-1.43792	0.514549
novel-m0657-3p	22	TCAGAATGTTGGGAATTGCTCA	9	5	2	2	0	0	0	0.5898	0.2378	0.2234	0	0	0	0.350333	0.01	-5.13066	0.0729761
novel-m0658-3p	23	TGTTTCCAGTTTGGCCTTGTAAC	268	43	49	45	47	39	45	5.0726	5.825	5.0271	4.5604	4.9693	5.2225	5.30823	4.9174	-0.110336	0.91799
novel-m0659-3p	21	GCACTGTATTGGGGTTTGACT	10	3	4	3	0	0	0	0.3539	0.4755	0.3351	0	0	0	0.388167	0.01	-5.2786	0.0391912
novel-m0660-5p	24	ACTGGTTTCAAGTTGGTGGTAAGA	32	4	6	2	14	0	6	0.4719	0.7133	0.2234	1.3584	0	0.6963	0.469533	0.6849	0.544666	0.561601
novel-m0661-5p	23	TAGTACATAGATGGCAGTCTCCT	8	2	0	0	2	0	4	0.2359	0	0	0.1941	0	0.4642	0.0786333	0.219433	1.48057	0.648982
novel-m0662-3p	24	TCGTAGTTTCATCTCACACGCATC	16	0	2	7	2	2	3	0	0.2378	0.782	0.1941	0.2548	0.3482	0.339933	0.2657	-0.355454	1
novel-m0663-5p	20	TCCCAGAAGACAGTATTCTT	8	3	0	0	3	0	2	0.3539	0	0	0.2911	0	0.2321	0.117967	0.1744	0.564021	0.887723
