# Supplementary material for: Regulation of soldier caste differentiation by microRNAs in Formosan subterranean termite (Coptotermes formosanus Shiraki)
Source: PeerJ. 2024 Feb 29;12:e16843. doi: 10.7717/peerj.16843 (PMC10909360; doi:10.7717/peerj.16843)
Supplement: Supplemental Information 8 [file peerj-12-16843-s008.xlsx]

## Sheet: Supplementary table 6. miRNA an
miRNA	C TPM	M TPM	log2(FC)	P value	Gene ID	C RPKM	M RPKM	log2 Ratio	P value	FDR	Symbol	Description	KEGG A class	KEGG B class	Pathway	K ID	GO Component	GO Function	GO Process
iab-4-x	1.63907	5.4755	1.74012	0.0456177	Unigene0001440	19.7642	9.64903	-1.03443	0.0010184	0.0451824	Cyp6a14	cytochrome P450 [Hodotermopsis sjostedti]	-	-	-	-	-	GO:0016491//oxidoreductase activity;GO:0046906//tetrapyrrole binding;GO:0046914//transition metal ion binding	GO:0044710//single-organism metabolic process
iab-4-x	1.63907	5.4755	1.74012	0.0456177	Unigene0003480	11.056	5.15027	-1.10211	6.99546e-05	0.00583814	--	Protein Tob2 [Zootermopsis nevadensis]	Genetic Information Processing	Folding, sorting and degradation	ko03018//RNA degradation	K14443	-	-	-
iab-4-x	1.63907	5.4755	1.74012	0.0456177	Unigene0004612	53.3953	24.9074	-1.10014	1.44869e-05	0.00160624	--	PREDICTED: RNA-directed DNA polymerase from mobile element jockey isoform X1 [Amyelois transitella]	-	-	-	-	-	-	-
iab-4-x	1.63907	5.4755	1.74012	0.0456177	Unigene0005790	13.1031	5.30943	-1.30328	4.90309e-07	8.60235e-05	4CL	PREDICTED: probable 4-coumarate--CoA ligase 5 [Diachasma alloeum]	-	-	-	-	-	-	-
iab-4-x	1.63907	5.4755	1.74012	0.0456177	Unigene0008481	4.7343	1.92427	-1.29884	8.57056e-07	0.000141523	NLGN4X	AGAP003570-PA-like protein [Anopheles sinensis]	-	-	-	-	-	-	-
iab-4-x	1.63907	5.4755	1.74012	0.0456177	Unigene0011860	180.192	86.4759	-1.05917	1.74211e-05	0.00188228	unc-89	Muscle M-line assembly protein unc-89 [Zootermopsis nevadensis]	-	-	-	-	-	-	-
iab-4-x	1.63907	5.4755	1.74012	0.0456177	Unigene0046520	3.6938	1.4433	-1.35573	2.55163e-05	0.00260252	tre1	trehalase [Coptotermes formosanus]	Metabolism	Global and overview maps;Carbohydrate metabolism	ko01100//Metabolic pathways;ko00500//Starch and sucrose metabolism	K01194	-	-	-
iab-4-x	1.63907	5.4755	1.74012	0.0456177	Unigene0054091	108.62	30.979	-1.80993	2.4181e-12	1.30997e-09	--	Cuticle protein 6 [Zootermopsis nevadensis]	-	-	-	-	-	-	-
iab-4-x	1.63907	5.4755	1.74012	0.0456177	Unigene0057974	7.34243	2.69977	-1.44342	5.13086e-06	0.000677795	--	PREDICTED: uncharacterized protein LOC106061839, partial [Biomphalaria glabrata]	-	-	-	-	-	-	-
iab-4-x	1.63907	5.4755	1.74012	0.0456177	Unigene0067857	157.302	36.9822	-2.08863	9.9184e-17	1.12392e-13	Fam13a	PREDICTED: protein FAM13A [Vollenhovia emeryi]	-	-	-	-	-	-	-
let-7-y	71.2852	173.775	1.28555	0.000630018	Unigene0000449	7.88777	0.633167	-3.63896	2.13192e-19	3.25091e-16	Gld	Glucose dehydrogenase [acceptor] [Zootermopsis nevadensis]	Metabolism	Global and overview maps;Carbohydrate metabolism	ko01100//Metabolic pathways;ko00030//Pentose phosphate pathway	K00115	-	GO:0016491//oxidoreductase activity	-
let-7-y	71.2852	173.775	1.28555	0.000630018	Unigene0001430	6.35007	2.4776	-1.35783	1.60834e-06	0.00024739	Cyp6a14	cytochrome P450 [Hodotermopsis sjostedti]	-	-	-	-	-	GO:0016491//oxidoreductase activity;GO:0046872//metal ion binding	-
let-7-y	71.2852	173.775	1.28555	0.000630018	Unigene0001542	1.84603	0.1964	-3.23256	3.31123e-17	3.93256e-14	--	Ankyrin repeat-containing protein [Oryctes borbonicus]	-	-	-	-	-	-	-
let-7-y	71.2852	173.775	1.28555	0.000630018	Unigene0002861	4.9351	0.9363	-2.39804	1.9827e-11	9.17203e-09	--	hypothetical protein L798_05335, partial [Zootermopsis nevadensis]	-	-	-	-	-	-	-
let-7-y	71.2852	173.775	1.28555	0.000630018	Unigene0004579	9.1876	2.4447	-1.91003	2.51501e-11	1.13373e-08	SDR-1	enkurin [Coptotermes formosanus]	-	-	-	-	-	-	-
let-7-y	71.2852	173.775	1.28555	0.000630018	Unigene0006224	14.0745	6.55913	-1.1015	4.97256e-05	0.00444418	Dhrs11	enkurin [Coptotermes formosanus]	Metabolism	Metabolism of terpenoids and polyketides	ko00900//Terpenoid backbone biosynthesis ;ko00981//Insect hormone biosynthesis	K15890	-	-	-
let-7-y	71.2852	173.775	1.28555	0.000630018	Unigene0008280	77.3719	23.2799	-1.73273	4.03822e-07	7.28147e-05	--	hypothetical protein L798_11021 [Zootermopsis nevadensis]	-	-	-	-	-	-	-
let-7-y	71.2852	173.775	1.28555	0.000630018	Unigene0010872	41.2269	14.0845	-1.54948	5.10158e-09	1.44855e-06	AAO2	Xanthine dehydrogenase, partial [Zootermopsis nevadensis]	Metabolism;Cellular Processes	Nucleotide metabolism;Transport and catabolism;Global and overview maps;Biosynthesis of other secondary metabolites;Xenobiotics biodegradation and metabolism	ko01100//Metabolic pathways;ko00230//Purine metabolism ;ko00983//Drug metabolism - other enzymes ;ko04146//Peroxisome ;ko00232//Caffeine metabolism	K00106	-	-	-
let-7-y	71.2852	173.775	1.28555	0.000630018	Unigene0011860	180.192	86.4759	-1.05917	1.74211e-05	0.00188228	unc-89	Muscle M-line assembly protein unc-89 [Zootermopsis nevadensis]	-	-	-	-	-	-	-
let-7-y	71.2852	173.775	1.28555	0.000630018	Unigene0014786	4.60047	1.18423	-1.95783	1.19436e-10	4.65369e-08	Tret1	Solute carrier family 2, facilitated glucose transporter member 8 [Zootermopsis nevadensis]	-	-	-	-	-	-	-
let-7-y	71.2852	173.775	1.28555	0.000630018	Unigene0015795	228.989	113.851	-1.00813	6.10845e-05	0.00523222	Zasp52	LIM domain-binding protein 3 [Zootermopsis nevadensis]	-	-	-	-	-	-	-
let-7-y	71.2852	173.775	1.28555	0.000630018	Unigene0045136	3.32927	1.5591	-1.09449	0.000174272	0.0119254	BB4	[Phe13]-bombesin receptor [Zootermopsis nevadensis]	Environmental Information Processing	Signaling molecules and interaction	ko04080//Neuroactive ligand-receptor interaction	K04170	-	-	-
let-7-y	71.2852	173.775	1.28555	0.000630018	Unigene0045546	18.3839	8.7831	-1.06564	0.000127783	0.00936752	Lpar6	Protein msta, isoform A [Zootermopsis nevadensis]	-	-	-	-	-	-	-
let-7-y	71.2852	173.775	1.28555	0.000630018	Unigene0048726	19.7212	4.41287	-2.15996	3.83655e-17	4.51306e-14	SOD1	PREDICTED: superoxide dismutase [Cu-Zn]-like [Anoplophora glabripennis]	Organismal Systems;Cellular Processes	Aging;Transport and catabolism	ko04146//Peroxisome ;ko04213//Longevity regulating pathway - multiple species	K04565	-	-	-
let-7-y	71.2852	173.775	1.28555	0.000630018	Unigene0049039	28.0333	13.223	-1.0841	0.000296903	0.0180472	--	hypothetical protein [Coptotermes formosanus]	-	-	-	-	-	-	-
let-7-y	71.2852	173.775	1.28555	0.000630018	Unigene0050765	7.59323	3.05197	-1.31498	3.85787e-05	0.00363744	ple	PREDICTED: tyrosine 3-monooxygenase [Bemisia tabaci]	Metabolism	Amino acid metabolism;Global and overview maps;Metabolism of cofactors and vitamins	ko01100//Metabolic pathways;ko00790//Folate biosynthesis ;ko00350//Tyrosine metabolism	K00501	-	-	-
let-7-y	71.2852	173.775	1.28555	0.000630018	Unigene0050820	11.6435	0.877567	-3.72987	3.08095e-29	1.40942e-25	--	Protein takeout [Zootermopsis nevadensis]	-	-	-	-	-	-	-
let-7-y	71.2852	173.775	1.28555	0.000630018	Unigene0051968	11.4185	4.96883	-1.2004	2.49997e-06	0.0003676	--	General odorant-binding protein 19a [Zootermopsis nevadensis]	-	-	-	-	-	-	-
let-7-y	71.2852	173.775	1.28555	0.000630018	Unigene0053964	0.421033	0.0425667	-3.30614	0.000927285	0.0423571	LIPA	Lipase 3 [Zootermopsis nevadensis]	Cellular Processes;Metabolism	Transport and catabolism;Lipid metabolism	ko04142//Lysosome ;ko00100//Steroid biosynthesis	K01052	-	-	-
let-7-y	71.2852	173.775	1.28555	0.000630018	Unigene0057294	27.3956	11.6679	-1.2314	6.66425e-07	0.000113536	slc25a36a	Solute carrier family 25 member 36, partial [Zootermopsis nevadensis]	-	-	-	-	-	GO:0004175//endopeptidase activity;GO:0038024//cargo receptor activity;GO:0097367//carbohydrate derivative binding	GO:0006022//aminoglycan metabolic process;GO:0006897//endocytosis;GO:0019538//protein metabolic process
let-7-y	71.2852	173.775	1.28555	0.000630018	Unigene0060793	13.4928	5.55703	-1.27981	2.13989e-07	4.09781e-05	--	PREDICTED: TRPL translocation defect protein 14 isoform X2 [Apis cerana]	-	-	-	-	-	-	-
let-7-y	71.2852	173.775	1.28555	0.000630018	Unigene0061786	3.4326	1.3519	-1.34431	0.000468467	0.0255803	--	endonuclease-reverse transcriptase [Blattella germanica]	-	-	-	-	-	-	-
let-7-y	71.2852	173.775	1.28555	0.000630018	Unigene0062264	7.04337	2.32043	-1.60187	1.20854e-08	3.21018e-06	Est-6	Esterase FE4 [Zootermopsis nevadensis]	Metabolism	Xenobiotics biodegradation and metabolism;Global and overview maps	ko01100//Metabolic pathways;ko00983//Drug metabolism - other enzymes	K01044	-	-	-
let-7-y	71.2852	173.775	1.28555	0.000630018	Unigene0065053	35.904	10.3222	-1.7984	4.03133e-11	1.72892e-08	SG1	carboxylesterase-6-like protein, partial [Coptotermes formosanus]	Metabolism	Lipid metabolism	ko00564//Glycerophospholipid metabolism	K01049	-	-	-
let-7-y	71.2852	173.775	1.28555	0.000630018	Unigene0065093	13.8439	5.3092	-1.38268	0.000217765	0.0142464	slc5a8	Sodium-coupled monocarboxylate transporter 1, partial [Zootermopsis nevadensis]	-	-	-	-	-	-	-
let-7-y	71.2852	173.775	1.28555	0.000630018	Unigene0069198	1.83583	0.6279	-1.54783	8.54922e-06	0.00104241	--	--	-	-	-	-	-	-	-
let-7-y	71.2852	173.775	1.28555	0.000630018	Unigene0069813	232.075	110.281	-1.07341	1.89001e-05	0.0020223	--	PREDICTED: myosin-10-like isoform X3 [Halyomorpha halys]	-	-	-	-	-	-	-
let-7-y	71.2852	173.775	1.28555	0.000630018	Unigene0070819	1.15277	0.1865	-2.62785	8.74372e-08	1.86848e-05	fln	Flightin [Zootermopsis nevadensis]	-	-	-	-	-	-	-
let-7-y	71.2852	173.775	1.28555	0.000630018	Unigene0070821	92.1038	30.7313	-1.58355	3.83522e-10	1.34959e-07	fln	Flightin [Zootermopsis nevadensis]	-	-	-	-	-	-	-
let-7-y	71.2852	173.775	1.28555	0.000630018	Unigene0071891	15.9397	2.43293	-2.71185	3.01403e-13	1.81599e-10	up	troponin T [Coptotermes formosanus]	-	-	-	-	-	-	-
let-7-y	71.2852	173.775	1.28555	0.000630018	Unigene0071896	156.169	26.4973	-2.55919	8.42023e-24	2.36369e-20	AAEL002956	PREDICTED: probable citrate synthase 2, mitochondrial [Diaphorina citri]	Metabolism	Global and overview maps;Carbohydrate metabolism	ko01100//Metabolic pathways;ko01200//Carbon metabolism;ko01230//Biosynthesis of amino acids;ko00020//Citrate cycle (TCA cycle) ;ko00630//Glyoxylate and dicarboxylate metabolism ;ko01210//2-Oxocarboxylic acid metabolism	K01647	-	-	-
let-7-y	71.2852	173.775	1.28555	0.000630018	Unigene0072582	43.1572	8.98283	-2.26436	2.02933e-16	2.21816e-13	--	Dehydrogenase/reductase SDR family member 11 [Zootermopsis nevadensis]	-	-	-	-	-	-	-
let-7-y	71.2852	173.775	1.28555	0.000630018	Unigene0073085	22.2006	5.61503	-1.98323	2.56227e-12	1.38201e-09	--	spatzle 6 precursor [Tribolium castaneum]	-	-	-	-	-	-	-
let-7-y	71.2852	173.775	1.28555	0.000630018	Unigene0073580	10.2363	1.87237	-2.45075	6.32531e-16	6.51059e-13	wupA	Troponin I [Papilio machaon]	-	-	-	-	-	-	-
let-7-y	71.2852	173.775	1.28555	0.000630018	Unigene0074152	110.008	38.6467	-1.50919	2.29848e-09	7.07973e-07	Mp20	PREDICTED: myophilin [Trichogramma pretiosum]	-	-	-	-	-	-	GO:0030036//actin cytoskeleton organization
let-7-y	71.2852	173.775	1.28555	0.000630018	Unigene0076084	4.9668	1.00287	-2.30819	3.34364e-14	2.41514e-11	Gld	Glucose dehydrogenase [acceptor] [Zootermopsis nevadensis]	-	-	-	-	-	GO:0005488//binding;GO:0016614//oxidoreductase activity, acting on CH-OH group of donors	GO:0044710//single-organism metabolic process
miR-10174-y	1.95163	0.289133	-2.75488	0.00785859	Unigene0001076	1.12863	2.56927	1.18678	0.000190851	0.0128184	--	hypothetical protein L798_10476 [Zootermopsis nevadensis]	-	-	-	-	-	-	-
miR-10174-y	1.95163	0.289133	-2.75488	0.00785859	Unigene0001848	2.1059	4.2861	1.02523	9.82357e-05	0.00761836	osgep	PREDICTED: probable tRNA N6-adenosine threonylcarbamoyltransferase [Anoplophora glabripennis]	-	-	-	-	GO:0044424//intracellular part	GO:0016746//transferase activity, transferring acyl groups;GO:0043169//cation binding	GO:0006400//tRNA modification
miR-10174-y	1.95163	0.289133	-2.75488	0.00785859	Unigene0003846	8.02523	25.2436	1.6533	4.33574e-10	1.51279e-07	Rasl11a	PREDICTED: ras-related and estrogen-regulated growth inhibitor [Neodiprion lecontei]	-	-	-	-	GO:0044464//cell part	GO:0032550//purine ribonucleoside binding	GO:0008104//protein localization;GO:0035556//intracellular signal transduction
miR-10174-y	1.95163	0.289133	-2.75488	0.00785859	Unigene0004289	5.49617	11.8199	1.10472	5.52324e-05	0.00481781	--	PREDICTED: histone-lysine N-methyltransferase ash1 isoform X3 [Halyomorpha halys]	Metabolism	Amino acid metabolism	ko00310//Lysine degradation	K06101	GO:0043231//intracellular membrane-bounded organelle	GO:0016279//protein-lysine N-methyltransferase activity;GO:0046914//transition metal ion binding	GO:0016571//histone methylation
miR-10174-y	1.95163	0.289133	-2.75488	0.00785859	Unigene0004647	1.9383	4.01037	1.04894	0.000118767	0.0088584	iHog	Interference hedgehog [Zootermopsis nevadensis]	Environmental Information Processing	Signal transduction	ko04341//Hedgehog signaling pathway - fly	K20245	-	-	-
miR-10174-y	1.95163	0.289133	-2.75488	0.00785859	Unigene0005733	9.52103	40.8393	2.10077	6.97205e-16	7.00124e-13	mariner\T	PREDICTED: histone-lysine N-methyltransferase SETMAR-like [Trachymyrmex septentrionalis]	Metabolism	Amino acid metabolism	ko00310//Lysine degradation	K11433	-	-	-
miR-10174-y	1.95163	0.289133	-2.75488	0.00785859	Unigene0006702	8.70733	18.7974	1.11023	7.06195e-05	0.00588965	--	PREDICTED: leucine-rich repeat-containing protein 15 isoform X2 [Acyrthosiphon pisum]	-	-	-	-	-	-	-
miR-10174-y	1.95163	0.289133	-2.75488	0.00785859	Unigene0007952	1.286	3.6533	1.50631	6.21583e-08	1.39591e-05	Fbln7	PREDICTED: fibrillin-3-like isoform X1 [Cephus cinctus]	-	-	-	-	-	-	-
miR-10174-y	1.95163	0.289133	-2.75488	0.00785859	Unigene0010072	12.7435	26.7263	1.06849	3.45115e-05	0.00331726	ZFAND6	PREDICTED: mucin-3A isoform X2 [Acyrthosiphon pisum]	-	-	-	-	-	-	-
miR-10174-y	1.95163	0.289133	-2.75488	0.00785859	Unigene0010184	0.286967	0.9461	1.72111	1.31407e-05	0.00148633	--	Protein abnormal spindle [Zootermopsis nevadensis]	-	-	-	-	-	-	-
miR-10174-y	1.95163	0.289133	-2.75488	0.00785859	Unigene0012084	28.6023	80.772	1.49772	6.25142e-09	1.75089e-06	slc36a4	PREDICTED: proton-coupled amino acid transporter 1-like isoform X3 [Halyomorpha halys]	-	-	-	-	-	-	-
miR-10174-y	1.95163	0.289133	-2.75488	0.00785859	Unigene0012138	0.994433	3.33987	1.74784	5.00149e-06	0.000663543	--	hypothetical protein L798_09722 [Zootermopsis nevadensis]	-	-	-	-	-	-	-
miR-10174-y	1.95163	0.289133	-2.75488	0.00785859	Unigene0013754	3.24617	8.3187	1.35762	2.34253e-07	4.41737e-05	Lrrc47	Leucine-rich repeat-containing protein 47 [Zootermopsis nevadensis]	-	-	-	-	-	-	-
miR-10174-y	1.95163	0.289133	-2.75488	0.00785859	Unigene0013931	1.71107	3.59933	1.07283	0.000162093	0.011305	Mus81	Crossover junction endonuclease MUS81 [Zootermopsis nevadensis]	Genetic Information Processing	Replication and repair	ko03460//Fanconi anemia pathway ;ko03440//Homologous recombination	K08991	-	-	-
miR-10174-y	1.95163	0.289133	-2.75488	0.00785859	Unigene0013956	0.2329	3.49627	3.90803	2.80967e-13	1.70116e-10	Pxt	PREDICTED: chorion peroxidase [Neodiprion lecontei]	-	-	-	-	-	GO:0003824//catalytic activity;GO:0046906//tetrapyrrole binding	GO:0006950//response to stress;GO:0044710//single-organism metabolic process
miR-10174-y	1.95163	0.289133	-2.75488	0.00785859	Unigene0013982	20.6721	67.1745	1.70023	3.50716e-10	1.23768e-07	BNIP3	BCL2/adenovirus E1B 19 kDa protein-interacting protein 3-like [Zootermopsis nevadensis]	Cellular Processes;Environmental Information Processing	Signal transduction;Transport and catabolism	ko04140//Autophagy - animal ;ko04068//FoxO signaling pathway ;ko04137//Mitophagy - animal	K15464	GO:0031224//intrinsic component of membrane	-	GO:0042981//regulation of apoptotic process
miR-10174-y	1.95163	0.289133	-2.75488	0.00785859	Unigene0014173	0.0899333	2.1223	4.56063	0.000111766	0.00842783	--	Leucine-rich repeat neuronal protein 2 [Zootermopsis nevadensis]	-	-	-	-	-	-	-
miR-10174-y	1.95163	0.289133	-2.75488	0.00785859	Unigene0024149	0.512667	1.4925	1.54164	0.000229309	0.01486	--	Protein abnormal spindle [Zootermopsis nevadensis]	-	-	-	-	-	-	-
miR-10174-y	1.95163	0.289133	-2.75488	0.00785859	Unigene0041390	3.8005	12.6658	1.73668	1.70378e-09	5.39597e-07	--	Myc protein [Zootermopsis nevadensis]	Environmental Information Processing	Signal transduction	ko04010//MAPK signaling pathway ;ko04310//Wnt signaling pathway ;ko04391//Hippo signaling pathway -fly ;ko04350//TGF-beta signaling pathway ;ko04012//ErbB signaling pathway	K04377	-	-	-
miR-10174-y	1.95163	0.289133	-2.75488	0.00785859	Unigene0043488	3.4484	11.8447	1.78024	2.64283e-08	6.45116e-06	HSDL1	PREDICTED: inactive hydroxysteroid dehydrogenase-like protein 1 [Bemisia tabaci]	-	-	-	-	-	GO:0003824//catalytic activity	GO:0044710//single-organism metabolic process
miR-10174-y	1.95163	0.289133	-2.75488	0.00785859	Unigene0045451	0.108367	11.476	6.72656	4.70773e-05	0.00426302	--	Cuticlin-1 [Zootermopsis nevadensis]	-	-	-	-	-	-	-
miR-10174-y	1.95163	0.289133	-2.75488	0.00785859	Unigene0045529	0.3205	4.92387	3.9414	2.876e-18	3.77903e-15	--	PREDICTED: mucin-5AC [Bemisia tabaci]	-	-	-	-	-	-	-
miR-10174-y	1.95163	0.289133	-2.75488	0.00785859	Unigene0046213	11.7749	26.0141	1.14358	1.72231e-05	0.00186606	Eip74EF	PREDICTED: ecdysone-induced protein 74EF-like isoform X1 [Agrilus planipennis]	Cellular Processes	Cell growth and death	ko04214//Apoptosis - fly	K09428	-	-	-
miR-10174-y	1.95163	0.289133	-2.75488	0.00785859	Unigene0046265	1.86063	4.96443	1.41584	3.16065e-07	5.818e-05	--	PREDICTED: zinc finger protein 253-like, partial [Octopus bimaculoides]	-	-	-	-	-	-	-
miR-10174-y	1.95163	0.289133	-2.75488	0.00785859	Unigene0046802	0.953433	2.0067	1.07362	0.00013124	0.00956273	ems	PREDICTED: homeotic protein empty spiracles-like [Bemisia tabaci]	-	-	-	-	GO:0043231//intracellular membrane-bounded organelle	GO:0003677//DNA binding	GO:0010468//regulation of gene expression
miR-10174-y	1.95163	0.289133	-2.75488	0.00785859	Unigene0047043	2.1238	6.4837	1.61017	3.83433e-09	1.11697e-06	tx	Helix-loop-helix protein delilah [Zootermopsis nevadensis]	-	-	-	-	-	-	-
miR-10174-y	1.95163	0.289133	-2.75488	0.00785859	Unigene0047174	0.3804	1.27173	1.74121	7.06226e-06	0.00089283	Ccnjl	Cyclin-J-like protein [Zootermopsis nevadensis]	-	-	-	-	-	-	-
miR-10174-y	1.95163	0.289133	-2.75488	0.00785859	Unigene0047371	0.5235	5.8567	3.48383	9.93558e-18	1.22719e-14	SOSTDC1	Sclerostin domain-containing protein 1 [Zootermopsis nevadensis]	-	-	-	-	-	-	-
miR-10174-y	1.95163	0.289133	-2.75488	0.00785859	Unigene0047409	4.09213	8.36887	1.03218	5.81545e-05	0.00502305	Utp14b	U3 small nucleolar RNA-associated protein 14-like protein A [Zootermopsis nevadensis]	Genetic Information Processing	Translation	ko03008//Ribosome biogenesis in eukaryotes	K14567	-	-	-
miR-10174-y	1.95163	0.289133	-2.75488	0.00785859	Unigene0047850	11.1763	61.633	2.46326	0.000220089	0.0143756	--	hypothetical protein [Coptotermes formosanus]	-	-	-	-	-	-	-
miR-10174-y	1.95163	0.289133	-2.75488	0.00785859	Unigene0048153	1.84653	3.99657	1.11394	0.000115047	0.00862675	--	PREDICTED: transcription factor Adf-1-like [Acyrthosiphon pisum]	-	-	-	-	-	-	-
miR-10174-y	1.95163	0.289133	-2.75488	0.00785859	Unigene0048279	0.743533	2.6484	1.83265	5.63477e-07	9.7476e-05	fd96Ca	Fork head domain-containing protein FD4 [Zootermopsis nevadensis]	-	-	-	-	GO:0043231//intracellular membrane-bounded organelle	GO:0001071//nucleic acid binding transcription factor activity;GO:0003677//DNA binding	GO:0010468//regulation of gene expression;GO:0034645//cellular macromolecule biosynthetic process
miR-10174-y	1.95163	0.289133	-2.75488	0.00785859	Unigene0048643	41.8092	99.3696	1.24898	6.15812e-07	0.000105349	Inx3	PREDICTED: innexin inx3 [Papilio polytes]	-	-	-	-	GO:0031224//intrinsic component of membrane	-	GO:0044765//single-organism transport
miR-10174-y	1.95163	0.289133	-2.75488	0.00785859	Unigene0048690	1.5928	5.88413	1.88526	6.21172e-12	3.14443e-09	--	GD10515 [Drosophila simulans]	-	-	-	-	-	-	-
miR-10174-y	1.95163	0.289133	-2.75488	0.00785859	Unigene0048928	10.3317	26.59	1.3638	1.34202e-07	2.69967e-05	Lrrn4	Insulin-like growth factor-binding protein complex acid labile chain [Zootermopsis nevadensis]	-	-	-	-	-	-	-
miR-10174-y	1.95163	0.289133	-2.75488	0.00785859	Unigene0048944	3.21467	8.95827	1.47855	2.29319e-08	5.68762e-06	brat	B-box type zinc finger protein ncl-1, partial [Zootermopsis nevadensis]	-	-	-	-	-	-	-
miR-10174-y	1.95163	0.289133	-2.75488	0.00785859	Unigene0048987	0.934533	2.4691	1.40167	9.73922e-06	0.0011589	CG7708	High-affinity choline transporter 1 [Zootermopsis nevadensis]	-	-	-	-	-	-	-
miR-10174-y	1.95163	0.289133	-2.75488	0.00785859	Unigene0049224	9.4626	69.5989	2.87876	2.84064e-18	3.77271e-15	--	hypothetical protein L798_05444 [Zootermopsis nevadensis]	-	-	-	-	-	-	-
miR-10174-y	1.95163	0.289133	-2.75488	0.00785859	Unigene0049525	7.60823	33.7861	2.1508	1.08226e-15	1.03624e-12	h	Hairy protein [Periplaneta americana]	-	-	-	-	-	-	-
miR-10174-y	1.95163	0.289133	-2.75488	0.00785859	Unigene0049561	3.12367	7.60997	1.28465	8.05426e-06	0.000994821	sgl	UDP-glucose 6-dehydrogenase [Zootermopsis nevadensis]	Metabolism	Global and overview maps;Carbohydrate metabolism	ko01100//Metabolic pathways;ko00040//Pentose and glucuronate interconversions ;ko00520//Amino sugar and nucleotide sugar metabolism ;ko00053//Ascorbate and aldarate metabolism	K00012	-	GO:0000166//nucleotide binding;GO:0016614//oxidoreductase activity, acting on CH-OH group of donors	GO:0044710//single-organism metabolic process
miR-10174-y	1.95163	0.289133	-2.75488	0.00785859	Unigene0049612	6.97003	39.4536	2.50092	8.99204e-18	1.12187e-14	--	Transcriptional regulator ICP4 domain-containing protein [Daphnia magna]	-	-	-	-	-	-	-
miR-10174-y	1.95163	0.289133	-2.75488	0.00785859	Unigene0049626	6.91757	39.3739	2.5089	6.51339e-05	0.00550274	--	hypothetical protein L798_12569 [Zootermopsis nevadensis]	-	-	-	-	-	-	-
miR-10174-y	1.95163	0.289133	-2.75488	0.00785859	Unigene0049847	7.32363	46.1959	2.65713	1.82653e-24	5.45501e-21	--	kruppel homolog 1 protein, partial [Reticulitermes speratus]	-	-	-	-	-	-	-
miR-10174-y	1.95163	0.289133	-2.75488	0.00785859	Unigene0050110	3.33627	6.94707	1.05817	6.9947e-05	0.00583814	PRMT3	Protein arginine N-methyltransferase 3 [Zootermopsis nevadensis]	-	-	-	-	-	-	-
miR-10174-y	1.95163	0.289133	-2.75488	0.00785859	Unigene0050437	13.0072	42.7001	1.71492	3.617e-11	1.5842e-08	--	P-selectin [Zootermopsis nevadensis]	-	-	-	-	-	-	-
miR-10174-y	1.95163	0.289133	-2.75488	0.00785859	Unigene0051138	0.993567	2.36393	1.2505	1.00271e-05	0.00118614	p	PREDICTED: Hermansky-Pudlak syndrome 5 protein homolog [Ceratina calcarata]	-	-	-	-	-	-	-
miR-10174-y	1.95163	0.289133	-2.75488	0.00785859	Unigene0051718	10.9301	28.9282	1.40417	1.10014e-07	2.29534e-05	ITIH4	PREDICTED: inter-alpha-trypsin inhibitor heavy chain H4-like [Halyomorpha halys]	-	-	-	-	-	-	-
miR-10174-y	1.95163	0.289133	-2.75488	0.00785859	Unigene0051736	4.77793	22.4584	2.2328	9.44148e-15	7.62199e-12	hes4-a	Transcription factor HES-4-A [Zootermopsis nevadensis]	-	-	-	-	-	-	-
miR-10174-y	1.95163	0.289133	-2.75488	0.00785859	Unigene0051792	0.630433	1.39413	1.14495	9.34777e-05	0.0073196	B0563.6	PREDICTED: probable G-protein coupled receptor B0563.6 [Neodiprion lecontei]	-	-	-	-	-	-	-
miR-10174-y	1.95163	0.289133	-2.75488	0.00785859	Unigene0052207	6.2589	20.5978	1.71851	7.44855e-11	3.02634e-08	AGPAT1	1-acyl-sn-glycerol-3-phosphate acyltransferase alpha [Zootermopsis nevadensis]	Metabolism	Lipid metabolism;Global and overview maps	ko01100//Metabolic pathways;ko00564//Glycerophospholipid metabolism ;ko00561//Glycerolipid metabolism	K13509	-	GO:0016740//transferase activity	GO:0006629//lipid metabolic process
miR-10174-y	1.95163	0.289133	-2.75488	0.00785859	Unigene0052522	1.148	2.9417	1.35753	0.000990625	0.0442841	nrf-6	Nose resistant to fluoxetine protein 6 [Zootermopsis nevadensis]	-	-	-	-	-	-	-
miR-10174-y	1.95163	0.289133	-2.75488	0.00785859	Unigene0053166	4.05667	9.00323	1.15015	9.01312e-06	0.00108929	PLA2G3	PREDICTED: phospholipase A2-like [Cephus cinctus]	Metabolism	Global and overview maps;Lipid metabolism	ko01100//Metabolic pathways;ko00564//Glycerophospholipid metabolism ;ko00565//Ether lipid metabolism ;ko00590//Arachidonic acid metabolism ;ko00592//alpha-Linolenic acid metabolism ;ko00591//Linoleic acid metabolism	K01047	-	-	-
miR-10174-y	1.95163	0.289133	-2.75488	0.00785859	Unigene0053447	0.949033	2.21263	1.22123	0.00011429	0.00859196	pain	Transient receptor potential cation channel protein painless [Zootermopsis nevadensis]	-	-	-	-	-	-	-
miR-10174-y	1.95163	0.289133	-2.75488	0.00785859	Unigene0054032	1.43597	2.9589	1.04304	0.000295876	0.0179937	--	RNA exonuclease 1-like protein [Zootermopsis nevadensis]	Genetic Information Processing	Translation	ko03008//Ribosome biogenesis in eukaryotes	K14570	-	-	-
miR-10174-y	1.95163	0.289133	-2.75488	0.00785859	Unigene0055429	18.6865	62.3222	1.73775	3.16388e-11	1.40067e-08	NFIX	PREDICTED: nuclear factor 1 X-type isoform X4 [Bemisia tabaci]	-	-	-	-	-	-	-
miR-10174-y	1.95163	0.289133	-2.75488	0.00785859	Unigene0055471	9.76947	21.0043	1.10433	4.37199e-05	0.00402089	PDPK1	3-phosphoinositide-dependent protein kinase 1 [Zootermopsis nevadensis]	Cellular Processes;Environmental Information Processing	Signal transduction;Transport and catabolism	ko04140//Autophagy - animal ;ko04150//mTOR signaling pathway ;ko04068//FoxO signaling pathway	K06276	-	GO:0004672//protein kinase activity	-
miR-10174-y	1.95163	0.289133	-2.75488	0.00785859	Unigene0056884	0.1328	37.5151	8.14207	9.82512e-06	0.00116463	--	PREDICTED: keratin, type II cytoskeletal 1-like [Anoplophora glabripennis]	-	-	-	-	-	-	-
miR-10174-y	1.95163	0.289133	-2.75488	0.00785859	Unigene0057029	3.43937	27.5807	3.00344	5.972e-19	8.67802e-16	HPD	4-hydroxyphenylpyruvate dioxygenase [Zootermopsis nevadensis]	Metabolism	Metabolism of cofactors and vitamins;Global and overview maps;Amino acid metabolism	ko01100//Metabolic pathways;ko00350//Tyrosine metabolism ;ko00360//Phenylalanine metabolism ;ko00130//Ubiquinone and other terpenoid-quinone biosynthesis	K00457	-	-	-
miR-10174-y	1.95163	0.289133	-2.75488	0.00785859	Unigene0059582	0.4167	8.8134	4.40262	1.72048e-08	4.4738e-06	Sb	trypsin-7 [Nilaparvata lugens]	-	-	-	-	-	GO:0004175//endopeptidase activity	GO:0019538//protein metabolic process
miR-10174-y	1.95163	0.289133	-2.75488	0.00785859	Unigene0061309	28.2786	61.9532	1.13147	7.51649e-05	0.00621468	DUSP14	Dual specificity protein phosphatase 14 [Zootermopsis nevadensis]	-	-	-	-	-	GO:0016787//hydrolase activity	GO:0016311//dephosphorylation
miR-10174-y	1.95163	0.289133	-2.75488	0.00785859	Unigene0061358	2.30363	6.23277	1.43596	4.58738e-05	0.00417478	--	PREDICTED: protein NDNF [Anoplophora glabripennis]	-	-	-	-	-	-	-
miR-10174-y	1.95163	0.289133	-2.75488	0.00785859	Unigene0062015	3.93237	8.3073	1.07898	2.52182e-05	0.00257636	Rsl1d1	Ribosomal L1 domain-containing protein 1 [Zootermopsis nevadensis]	-	-	-	-	-	-	-
miR-10174-y	1.95163	0.289133	-2.75488	0.00785859	Unigene0062219	2.9216	29.3234	3.32722	0.000335228	0.0197924	--	LisH domain-containing protein ARMC9 [Zootermopsis nevadensis]	-	-	-	-	-	-	-
miR-10174-y	1.95163	0.289133	-2.75488	0.00785859	Unigene0064382	13.9801	40.2775	1.5266	2.32694e-09	7.1318e-07	tubb1	beta-tubulin 4 [Nilaparvata lugens]	Cellular Processes	Transport and catabolism	ko04145//Phagosome	K07375	-	-	-
miR-10174-y	1.95163	0.289133	-2.75488	0.00785859	Unigene0065154	5.2931	12.4275	1.23135	1.64684e-06	0.000251744	Tbl3	Transducin beta-like protein 3 [Zootermopsis nevadensis]	Genetic Information Processing	Translation	ko03008//Ribosome biogenesis in eukaryotes	K14555	-	-	-
miR-10174-y	1.95163	0.289133	-2.75488	0.00785859	Unigene0065755	7.45583	17.3465	1.2182	2.34398e-05	0.00243496	AAEL000263	PREDICTED: zinc finger protein jing [Cerapachys biroi]	-	-	-	-	-	-	-
miR-10174-y	1.95163	0.289133	-2.75488	0.00785859	Unigene0066160	7.1931	15.9211	1.14625	5.5546e-06	0.000727547	Ptchd3	Patched domain-containing protein 3 [Zootermopsis nevadensis]	-	-	-	-	-	-	-
miR-10174-y	1.95163	0.289133	-2.75488	0.00785859	Unigene0066235	2.0088	5.167	1.36299	5.9963e-06	0.000778793	--	Noggin-2 [Zootermopsis nevadensis]	Environmental Information Processing	Signal transduction	ko04350//TGF-beta signaling pathway	K04658	-	-	-
miR-10174-y	1.95163	0.289133	-2.75488	0.00785859	Unigene0066333	0.505933	5.70397	3.49495	0.000363045	0.0211776	nrf-6	Nose resistant to fluoxetine protein 6 [Zootermopsis nevadensis]	-	-	-	-	-	-	-
miR-10174-y	1.95163	0.289133	-2.75488	0.00785859	Unigene0067588	1.17457	3.73193	1.66779	2.2799e-07	4.325e-05	Ush1g	PREDICTED: Usher syndrome type-1G protein homolog isoform X1 [Athalia rosae]	-	-	-	-	-	-	-
miR-10174-y	1.95163	0.289133	-2.75488	0.00785859	Unigene0068296	2.21887	5.25447	1.24372	5.85846e-06	0.000764105	--	hypothetical protein L798_14034 [Zootermopsis nevadensis]	-	-	-	-	-	-	-
miR-10174-y	1.95163	0.289133	-2.75488	0.00785859	Unigene0069003	13.7435	29.7895	1.11606	9.51374e-06	0.00113755	--	PREDICTED: nucleolin 1 isoform X2 [Neodiprion lecontei]	-	-	-	-	-	-	-
miR-10174-y	1.95163	0.289133	-2.75488	0.00785859	Unigene0069758	4.47567	9.00657	1.00887	5.07922e-05	0.00451338	abcb6	ATP-binding cassette sub-family B member 6, mitochondrial [Zootermopsis nevadensis]	Environmental Information Processing	Membrane transport	ko02010//ABC transporters	K05661	-	-	-
miR-10174-y	1.95163	0.289133	-2.75488	0.00785859	Unigene0070457	2.0894	4.72187	1.17627	0.000375268	0.0216527	--	--	-	-	-	-	-	-	-
miR-10174-y	1.95163	0.289133	-2.75488	0.00785859	Unigene0071775	3.6217	8.29333	1.19529	3.26064e-06	0.000461326	mlec	Malectin-B [Zootermopsis nevadensis]	-	-	-	-	-	-	-
miR-10174-y	1.95163	0.289133	-2.75488	0.00785859	Unigene0072284	14.4483	42.4809	1.55591	9.53368e-08	2.01291e-05	AAEL008004	Elongation of very long chain fatty acids protein [Zootermopsis nevadensis]	-	-	-	-	GO:0016020//membrane	-	GO:0006631//fatty acid metabolic process
miR-10174-y	1.95163	0.289133	-2.75488	0.00785859	Unigene0072547	13.5107	27.0251	1.00019	5.36349e-05	0.00471175	CCT6A	T-complex protein 1 subunit zeta [Zootermopsis nevadensis]	-	-	-	-	GO:0044424//intracellular part	GO:0005515//protein binding;GO:0032550//purine ribonucleoside binding	GO:0044267//cellular protein metabolic process
miR-10174-y	1.95163	0.289133	-2.75488	0.00785859	Unigene0073915	0.0775333	47.1883	9.2494	2.4401e-05	0.00251577	--	CLUMA_CG000871, isoform A [Clunio marinus]	-	-	-	-	-	-	-
miR-10174-y	1.95163	0.289133	-2.75488	0.00785859	Unigene0075099	0.375067	1.11033	1.56577	0.000432056	0.0240819	--	Transposable element Tc3 transposase, partial [Anoplophora glabripennis]	-	-	-	-	-	-	-
miR-10174-y	1.95163	0.289133	-2.75488	0.00785859	Unigene0075113	9.41943	27.2963	1.53499	3.93053e-08	9.35413e-06	Ece1	Endothelin-converting enzyme 1 [Zootermopsis nevadensis]	-	-	-	-	-	-	-
miR-10174-y	1.95163	0.289133	-2.75488	0.00785859	Unigene0076411	1.70873	4.10457	1.2643	1.55565e-05	0.00170797	NHP2	H/ACA ribonucleoprotein complex subunit 2-like protein [Zootermopsis nevadensis]	Genetic Information Processing	Translation	ko03008//Ribosome biogenesis in eukaryotes	K11129	-	-	-
miR-10174-y	1.95163	0.289133	-2.75488	0.00785859	Unigene0078427	1.59387	4.2131	1.40235	9.09668e-07	0.000149412	RWDD2A	RWD domain-containing protein 2A [Zootermopsis nevadensis]	-	-	-	-	-	-	-
miR-10174-y	1.95163	0.289133	-2.75488	0.00785859	Unigene0081325	174.455	695.635	1.99547	7.84884e-15	6.4202e-12	Igfbpl1	Kazal-type serine protease inhibitor domain-containing protein 1 [Zootermopsis nevadensis]	-	-	-	-	-	-	-
miR-10174-y	1.95163	0.289133	-2.75488	0.00785859	Unigene0082396	1.57763	3.80533	1.27026	9.78908e-06	0.00116259	--	endonuclease-reverse transcriptase [Lasius niger]	-	-	-	-	-	-	-
miR-10174-y	1.95163	0.289133	-2.75488	0.00785859	Unigene0082409	0.0573	0.791733	3.78841	8.43811e-08	1.81574e-05	--	AGAP011943-PA, partial [Anopheles gambiae str. PEST] [Anopheles gambiae]	-	-	-	-	-	-	-
miR-10174-y	1.95163	0.289133	-2.75488	0.00785859	Unigene0107107	0.207433	11.7491	5.82376	2.23539e-22	4.92254e-19	--	Cuticle protein 5 [Zootermopsis nevadensis]	-	-	-	-	-	-	-
miR-101-y	54.6432	7.71453	-2.82439	0.000516992	Unigene0001076	1.12863	2.56927	1.18678	0.000190851	0.0128184	--	hypothetical protein L798_10476 [Zootermopsis nevadensis]	-	-	-	-	-	-	-
miR-101-y	54.6432	7.71453	-2.82439	0.000516992	Unigene0001785	1.41493	3.6649	1.37304	1.20764e-05	0.00138885	--	Mite allergen Lep d 7 [Zootermopsis nevadensis]	-	-	-	-	-	-	-
miR-101-y	54.6432	7.71453	-2.82439	0.000516992	Unigene0001848	2.1059	4.2861	1.02523	9.82357e-05	0.00761836	osgep	PREDICTED: probable tRNA N6-adenosine threonylcarbamoyltransferase [Anoplophora glabripennis]	-	-	-	-	GO:0044424//intracellular part	GO:0016746//transferase activity, transferring acyl groups;GO:0043169//cation binding	GO:0006400//tRNA modification
miR-101-y	54.6432	7.71453	-2.82439	0.000516992	Unigene0002500	8.97507	27.0564	1.59197	5.94896e-08	1.3433e-05	COL9A1	PREDICTED: collagen alpha-1(IX) chain-like isoform X1 [Aethina tumida]	Environmental Information Processing	Signaling molecules and interaction	ko04512//ECM-receptor interaction	K08131	-	-	-
miR-101-y	54.6432	7.71453	-2.82439	0.000516992	Unigene0002758	2.28233	8.3268	1.86725	1.87977e-09	5.89288e-07	--	Protein CREG1 [Zootermopsis nevadensis]	-	-	-	-	-	-	-
miR-101-y	54.6432	7.71453	-2.82439	0.000516992	Unigene0003250	4.2621	8.88633	1.06002	2.69332e-05	0.00271564	Glra4	PREDICTED: glycine receptor subunit alpha-4 isoform X19 [Cimex lectularius]	-	-	-	-	-	-	-
miR-101-y	54.6432	7.71453	-2.82439	0.000516992	Unigene0003691	3.84043	9.05497	1.23744	1.01013e-06	0.000164166	GRIK2	PREDICTED: glutamate receptor ionotropic, kainate 2 isoform X2 [Tribolium castaneum]	-	-	-	-	GO:0031224//intrinsic component of membrane;GO:0097060//synaptic membrane	GO:0005231//excitatory extracellular ligand-gated ion channel activity	GO:0006811//ion transport;GO:0007215//glutamate receptor signaling pathway
miR-101-y	54.6432	7.71453	-2.82439	0.000516992	Unigene0004289	5.49617	11.8199	1.10472	5.52324e-05	0.00481781	--	PREDICTED: histone-lysine N-methyltransferase ash1 isoform X3 [Halyomorpha halys]	Metabolism	Amino acid metabolism	ko00310//Lysine degradation	K06101	GO:0043231//intracellular membrane-bounded organelle	GO:0016279//protein-lysine N-methyltransferase activity;GO:0046914//transition metal ion binding	GO:0016571//histone methylation
miR-101-y	54.6432	7.71453	-2.82439	0.000516992	Unigene0004316	12.5618	38.4676	1.6146	3.15188e-09	9.36508e-07	ARL4C	ADP-ribosylation factor-like protein 4A [Zootermopsis nevadensis]	-	-	-	-	-	-	-
miR-101-y	54.6432	7.71453	-2.82439	0.000516992	Unigene0004647	1.9383	4.01037	1.04894	0.000118767	0.0088584	iHog	Interference hedgehog [Zootermopsis nevadensis]	Environmental Information Processing	Signal transduction	ko04341//Hedgehog signaling pathway - fly	K20245	-	-	-
miR-101-y	54.6432	7.71453	-2.82439	0.000516992	Unigene0004696	3.11633	6.3693	1.03129	8.68489e-05	0.00690737	bwa	Alkaline ceramidase [Zootermopsis nevadensis]	Metabolism	Lipid metabolism;Global and overview maps	ko01100//Metabolic pathways;ko00600//Sphingolipid metabolism	K01441	GO:0031224//intrinsic component of membrane	GO:0016810//hydrolase activity, acting on carbon-nitrogen (but not peptide) bonds	-
miR-101-y	54.6432	7.71453	-2.82439	0.000516992	Unigene0004964	3.0275	12.617	2.05917	1.68388e-10	6.37991e-08	Ggps1	Geranylgeranyl pyrophosphate synthetase [Zootermopsis nevadensis]	Metabolism	Metabolism of terpenoids and polyketides;Global and overview maps	ko01100//Metabolic pathways;ko00900//Terpenoid backbone biosynthesis	K00804	-	GO:0003824//catalytic activity	-
miR-101-y	54.6432	7.71453	-2.82439	0.000516992	Unigene0007263	5.3711	11.285	1.07111	7.99372e-05	0.00649142	per	Period circadian protein [Zootermopsis nevadensis]	Organismal Systems	Environmental adaptation	ko04711//Circadian rhythm - fly	K02633	-	-	-
miR-101-y	54.6432	7.71453	-2.82439	0.000516992	Unigene0007455	5.17893	11.7118	1.17723	6.31877e-06	0.00081243	--	WD repeat-containing protein 43 [Zootermopsis nevadensis]	Genetic Information Processing	Translation	ko03008//Ribosome biogenesis in eukaryotes	K14546	-	-	-
miR-101-y	54.6432	7.71453	-2.82439	0.000516992	Unigene0007992	11.0492	22.5135	1.02685	2.70308e-05	0.00272104	eRF1	Eukaryotic peptide chain release factor subunit 1 [Zootermopsis nevadensis]	Genetic Information Processing	Translation	ko03015//mRNA surveillance pathway	K03265	-	GO:0003747//translation release factor activity	GO:0043624//cellular protein complex disassembly
miR-101-y	54.6432	7.71453	-2.82439	0.000516992	Unigene0008233	1.27913	2.95137	1.20622	6.01322e-05	0.00516497	NLK	nemo-like protein [Nilaparvata lugens]	Environmental Information Processing	Signal transduction	ko04010//MAPK signaling pathway ;ko04310//Wnt signaling pathway ;ko04068//FoxO signaling pathway	K04468	-	GO:0004702//receptor signaling protein serine/threonine kinase activity;GO:0032550//purine ribonucleoside binding	GO:0006464//cellular protein modification process;GO:0006796//phosphate-containing compound metabolic process
miR-101-y	54.6432	7.71453	-2.82439	0.000516992	Unigene0009602	2.622	9.24147	1.81745	3.47193e-08	8.35937e-06	drm	Protein drumstick [Zootermopsis nevadensis]	-	-	-	-	-	GO:0043169//cation binding	-
miR-101-y	54.6432	7.71453	-2.82439	0.000516992	Unigene0010051	1.05373	66.8289	5.98689	6.28522e-06	0.000809509	--	AAEL017015-PA [Aedes aegypti]	-	-	-	-	-	-	-
miR-101-y	54.6432	7.71453	-2.82439	0.000516992	Unigene0010072	12.7435	26.7263	1.06849	3.45115e-05	0.00331726	ZFAND6	PREDICTED: mucin-3A isoform X2 [Acyrthosiphon pisum]	-	-	-	-	-	-	-
miR-101-y	54.6432	7.71453	-2.82439	0.000516992	Unigene0010594	0.679033	1.55313	1.19363	0.00037792	0.021782	tll1	Dorsal-ventral patterning tolloid-like protein 1, partial [Zootermopsis nevadensis]	-	-	-	-	-	-	-
miR-101-y	54.6432	7.71453	-2.82439	0.000516992	Unigene0011328	6.8301	16.0096	1.22896	4.06453e-06	0.000557811	HMT-2	Homocysteine S-methyltransferase 2 [Zootermopsis nevadensis]	Metabolism	Amino acid metabolism;Global and overview maps	ko01100//Metabolic pathways;ko00270//Cysteine and methionine metabolism	K00547	-	-	-
miR-101-y	54.6432	7.71453	-2.82439	0.000516992	Unigene0011775	5.37433	18.1411	1.7551	1.50722e-11	7.24373e-09	--	GM16903 [Drosophila sechellia]	-	-	-	-	-	-	-
miR-101-y	54.6432	7.71453	-2.82439	0.000516992	Unigene0013971	0.253233	0.915267	1.85372	1.15975e-05	0.00134251	--	hypothetical protein L798_03788 [Zootermopsis nevadensis]	-	-	-	-	-	-	-
miR-101-y	54.6432	7.71453	-2.82439	0.000516992	Unigene0014010	13.8877	36.1098	1.37858	6.63723e-08	1.47711e-05	twk-7	PREDICTED: TWiK family of potassium channels protein 7-like [Dufourea novaeangliae]	-	-	-	-	-	-	-
miR-101-y	54.6432	7.71453	-2.82439	0.000516992	Unigene0016188	7.0632	22.7924	1.69016	1.39506e-10	5.3347e-08	Ltv1	LTV1-like protein [Zootermopsis nevadensis]	-	-	-	-	-	-	-
miR-101-y	54.6432	7.71453	-2.82439	0.000516992	Unigene0024149	0.512667	1.4925	1.54164	0.000229309	0.01486	--	Protein abnormal spindle [Zootermopsis nevadensis]	-	-	-	-	-	-	-
miR-101-y	54.6432	7.71453	-2.82439	0.000516992	Unigene0029530	0.481	5.80183	3.5924	1.66522e-09	5.2874e-07	PCP20	Endocuticle structural glycoprotein SgAbd-2 [Zootermopsis nevadensis]	-	-	-	-	-	-	-
miR-101-y	54.6432	7.71453	-2.82439	0.000516992	Unigene0038271	0.001	21.5981	14.3986	4.46294e-05	0.00408326	--	chitin binding peritrophin-A domain containing protein [Coptotermes formosanus]	-	-	-	-	-	-	-
miR-101-y	54.6432	7.71453	-2.82439	0.000516992	Unigene0040109	0.8119	1.666	1.03701	0.000993429	0.0443773	--	Rho GTPase-activating protein 11A [Zootermopsis nevadensis]	-	-	-	-	-	-	-
miR-101-y	54.6432	7.71453	-2.82439	0.000516992	Unigene0040799	0.738467	4.66227	2.65843	3.47791e-15	3.06839e-12	Uro	urate oxidase [Blattella germanica]	Metabolism	Biosynthesis of other secondary metabolites;Nucleotide metabolism;Global and overview maps	ko01100//Metabolic pathways;ko00230//Purine metabolism ;ko00232//Caffeine metabolism	K00365	-	-	-
miR-101-y	54.6432	7.71453	-2.82439	0.000516992	Unigene0047040	1.16037	4.03847	1.79923	2.12034e-10	7.86467e-08	--	reverse transcriptase [Bactrocera tryoni]	-	-	-	-	-	-	-
miR-101-y	54.6432	7.71453	-2.82439	0.000516992	Unigene0047043	2.1238	6.4837	1.61017	3.83433e-09	1.11697e-06	tx	Helix-loop-helix protein delilah [Zootermopsis nevadensis]	-	-	-	-	-	-	-
miR-101-y	54.6432	7.71453	-2.82439	0.000516992	Unigene0047174	0.3804	1.27173	1.74121	7.06226e-06	0.00089283	Ccnjl	Cyclin-J-like protein [Zootermopsis nevadensis]	-	-	-	-	-	-	-
miR-101-y	54.6432	7.71453	-2.82439	0.000516992	Unigene0047332	1.3213	4.8121	1.86471	2.56398e-07	4.79107e-05	far1	Fatty acyl-CoA reductase 2 [Daphnia magna]	Organismal Systems;Cellular Processes	Transport and catabolism;Aging	ko04212//Longevity regulating pathway - worm ;ko04146//Peroxisome	K13356	-	GO:0016620//oxidoreductase activity, acting on the aldehyde or oxo group of donors, NAD or NADP as acceptor	-
miR-101-y	54.6432	7.71453	-2.82439	0.000516992	Unigene0047554	0.1097	0.5279	2.2667	0.000174771	0.0119462	--	hypothetical protein L798_11710 [Zootermopsis nevadensis]	-	-	-	-	-	-	-
miR-101-y	54.6432	7.71453	-2.82439	0.000516992	Unigene0047651	2.2342	4.7313	1.08248	0.000234263	0.0150703	--	hypothetical protein OCBIM_22037956mg, partial [Octopus bimaculoides]	-	-	-	-	-	-	-
miR-101-y	54.6432	7.71453	-2.82439	0.000516992	Unigene0048010	0.0193333	2.38197	6.94492	4.39877e-05	0.00404143	--	--	-	-	-	-	-	-	-
miR-101-y	54.6432	7.71453	-2.82439	0.000516992	Unigene0048643	41.8092	99.3696	1.24898	6.15812e-07	0.000105349	Inx3	PREDICTED: innexin inx3 [Papilio polytes]	-	-	-	-	GO:0031224//intrinsic component of membrane	-	GO:0044765//single-organism transport
miR-101-y	54.6432	7.71453	-2.82439	0.000516992	Unigene0048987	0.934533	2.4691	1.40167	9.73922e-06	0.0011589	CG7708	High-affinity choline transporter 1 [Zootermopsis nevadensis]	-	-	-	-	-	-	-
miR-101-y	54.6432	7.71453	-2.82439	0.000516992	Unigene0049212	2.59333	7.76173	1.58157	2.34712e-08	5.7981e-06	--	HEAT repeat-containing protein 3 [Zootermopsis nevadensis]	-	-	-	-	-	-	-
miR-101-y	54.6432	7.71453	-2.82439	0.000516992	Unigene0049318	2.1305	29.2256	3.77797	6.84247e-27	2.64109e-23	--	--	-	-	-	-	-	-	-
miR-101-y	54.6432	7.71453	-2.82439	0.000516992	Unigene0049347	10.2171	25.5257	1.32096	1.2343e-07	2.51576e-05	PSMC4	26S protease regulatory subunit 6B [Zootermopsis nevadensis]	Genetic Information Processing	Folding, sorting and degradation	ko03050//Proteasome	K03063	GO:0044424//intracellular part	GO:0032550//purine ribonucleoside binding;GO:0042623//ATPase activity, coupled	GO:0009057//macromolecule catabolic process;GO:0019538//protein metabolic process
miR-101-y	54.6432	7.71453	-2.82439	0.000516992	Unigene0049556	10.5948	22.3461	1.07666	2.43317e-05	0.00251214	Hars	Histidyl-tRNA synthetase, cytoplasmic [Zootermopsis nevadensis]	Genetic Information Processing	Translation	ko00970//Aminoacyl-tRNA biosynthesis	K01892	-	-	-
miR-101-y	54.6432	7.71453	-2.82439	0.000516992	Unigene0049610	0.0826	16.9744	7.68301	4.01104e-06	0.000551083	D11DS	PREDICTED: acyl-CoA Delta(11) desaturase-like [Copidosoma floridanum]	Metabolism;Organismal Systems	Lipid metabolism;Aging;Global and overview maps	ko04212//Longevity regulating pathway - worm ;ko01212//Fatty acid metabolism;ko01040//Biosynthesis of unsaturated fatty acids	K00507	-	GO:0016491//oxidoreductase activity	GO:0044710//single-organism metabolic process
miR-101-y	54.6432	7.71453	-2.82439	0.000516992	Unigene0049612	6.97003	39.4536	2.50092	8.99204e-18	1.12187e-14	--	Transcriptional regulator ICP4 domain-containing protein [Daphnia magna]	-	-	-	-	-	-	-
miR-101-y	54.6432	7.71453	-2.82439	0.000516992	Unigene0049615	7.00513	14.7307	1.07234	5.71811e-05	0.00496229	ABCE1	ATP-binding cassette sub-family E member 1 [Zootermopsis nevadensis]	-	-	-	-	-	GO:0005488//binding;GO:0017111//nucleoside-triphosphatase activity	GO:0044765//single-organism transport
miR-101-y	54.6432	7.71453	-2.82439	0.000516992	Unigene0049683	41.6646	86.0417	1.04622	1.79741e-05	0.00193723	ier5l	Immediate early response gene 5-like protein [Zootermopsis nevadensis]	-	-	-	-	-	-	-
miR-101-y	54.6432	7.71453	-2.82439	0.000516992	Unigene0049767	25.5394	103.758	2.02243	5.40726e-11	2.26399e-08	--	hypothetical protein L798_04498 [Zootermopsis nevadensis]	-	-	-	-	-	-	-
miR-101-y	54.6432	7.71453	-2.82439	0.000516992	Unigene0049970	3.90623	13.1317	1.74921	5.24015e-07	9.14177e-05	ACHE1	Esterase FE4 [Zootermopsis nevadensis]	Metabolism	Metabolism of terpenoids and polyketides	ko00981//Insect hormone biosynthesis	K01063	-	-	-
miR-101-y	54.6432	7.71453	-2.82439	0.000516992	Unigene0049990	18.5096	60.8344	1.71661	1.23944e-11	6.02713e-09	--	PREDICTED: sine oculis-binding protein homolog isoform X1 [Cimex lectularius]	-	-	-	-	-	-	-
miR-101-y	54.6432	7.71453	-2.82439	0.000516992	Unigene0050202	7.31317	19.2982	1.3999	5.66731e-08	1.29151e-05	Rtkn	Rhotekin [Zootermopsis nevadensis]	-	-	-	-	-	-	-
miR-101-y	54.6432	7.71453	-2.82439	0.000516992	Unigene0050707	5.36	39.7869	2.89199	2.2581e-21	4.35796e-18	Gadd45a	Growth arrest and DNA-damage-inducible protein GADD45 gamma [Zootermopsis nevadensis]	Environmental Information Processing	Signal transduction	ko04010//MAPK signaling pathway ;ko04068//FoxO signaling pathway	K04402	-	-	-
miR-101-y	54.6432	7.71453	-2.82439	0.000516992	Unigene0050825	1.92777	4.17357	1.11435	0.000189688	0.012761	Mcm6	DNA replication licensing factor Mcm6 [Zootermopsis nevadensis]	Genetic Information Processing	Replication and repair	ko03030//DNA replication	K02542	GO:0043231//intracellular membrane-bounded organelle;GO:0043234//protein complex	GO:0003676//nucleic acid binding;GO:0004386//helicase activity;GO:0032550//purine ribonucleoside binding	GO:0006259//DNA metabolic process;GO:0032392//DNA geometric change
miR-101-y	54.6432	7.71453	-2.82439	0.000516992	Unigene0051267	2.14583	4.386	1.03137	0.000307049	0.0184461	--	PREDICTED: SOSS complex subunit C homolog isoform X1 [Acromyrmex echinatior]	-	-	-	-	-	-	-
miR-101-y	54.6432	7.71453	-2.82439	0.000516992	Unigene0051581	0.2836	1.12937	1.99358	7.24011e-06	0.000910654	--	DNA polymerase V [Zootermopsis nevadensis]	-	-	-	-	-	-	-
miR-101-y	54.6432	7.71453	-2.82439	0.000516992	Unigene0051583	4.65023	10.2546	1.14089	8.57601e-06	0.00104464	mybbp1a	DNA polymerase V [Zootermopsis nevadensis]	-	-	-	-	-	-	-
miR-101-y	54.6432	7.71453	-2.82439	0.000516992	Unigene0051597	0.510533	5.1695	3.33995	2.90771e-07	5.40069e-05	mth2	G-protein coupled receptor Mth2 [Zootermopsis nevadensis]	-	-	-	-	-	-	-
miR-101-y	54.6432	7.71453	-2.82439	0.000516992	Unigene0051792	0.630433	1.39413	1.14495	9.34777e-05	0.0073196	B0563.6	PREDICTED: probable G-protein coupled receptor B0563.6 [Neodiprion lecontei]	-	-	-	-	-	-	-
miR-101-y	54.6432	7.71453	-2.82439	0.000516992	Unigene0052207	6.2589	20.5978	1.71851	7.44855e-11	3.02634e-08	AGPAT1	1-acyl-sn-glycerol-3-phosphate acyltransferase alpha [Zootermopsis nevadensis]	Metabolism	Lipid metabolism;Global and overview maps	ko01100//Metabolic pathways;ko00564//Glycerophospholipid metabolism ;ko00561//Glycerolipid metabolism	K13509	-	GO:0016740//transferase activity	GO:0006629//lipid metabolic process
miR-101-y	54.6432	7.71453	-2.82439	0.000516992	Unigene0052459	3.91307	8.19233	1.06597	5.13818e-05	0.00455267	CG9246	Nucleolar complex protein 2-like protein [Zootermopsis nevadensis]	-	-	-	-	-	-	-
miR-101-y	54.6432	7.71453	-2.82439	0.000516992	Unigene0052766	0.0711333	0.367367	2.36862	0.000656404	0.0329175	HYPK	Huntingtin-interacting protein K [Zootermopsis nevadensis]	-	-	-	-	-	-	-
miR-101-y	54.6432	7.71453	-2.82439	0.000516992	Unigene0053437	44.0491	104.024	1.23973	1.29392e-06	0.000204906	Klf11	Krueppel-like factor 10 [Zootermopsis nevadensis]	-	-	-	-	-	-	-
miR-101-y	54.6432	7.71453	-2.82439	0.000516992	Unigene0053447	0.949033	2.21263	1.22123	0.00011429	0.00859196	pain	Transient receptor potential cation channel protein painless [Zootermopsis nevadensis]	-	-	-	-	-	-	-
miR-101-y	54.6432	7.71453	-2.82439	0.000516992	Unigene0053533	7.338	15.6737	1.09488	8.26007e-06	0.00101618	BMS1	Ribosome biogenesis protein BMS1-like protein [Zootermopsis nevadensis]	Genetic Information Processing	Translation	ko03008//Ribosome biogenesis in eukaryotes	K14569	-	-	-
miR-101-y	54.6432	7.71453	-2.82439	0.000516992	Unigene0054032	1.43597	2.9589	1.04304	0.000295876	0.0179937	--	RNA exonuclease 1-like protein [Zootermopsis nevadensis]	Genetic Information Processing	Translation	ko03008//Ribosome biogenesis in eukaryotes	K14570	-	-	-
miR-101-y	54.6432	7.71453	-2.82439	0.000516992	Unigene0055053	1.72343	10.7253	2.63767	3.18473e-22	6.7821e-19	amdhd1	PREDICTED: probable imidazolonepropionase [Parasteatoda tepidariorum]	Metabolism	Global and overview maps;Amino acid metabolism	ko01100//Metabolic pathways;ko00340//Histidine metabolism	K01468	-	-	-
miR-101-y	54.6432	7.71453	-2.82439	0.000516992	Unigene0056734	16.4333	34.8725	1.08547	8.34645e-06	0.00102448	PSMA1	Proteasome subunit alpha type-1 [Zootermopsis nevadensis]	Genetic Information Processing	Folding, sorting and degradation	ko03050//Proteasome	K02725	-	-	-
miR-101-y	54.6432	7.71453	-2.82439	0.000516992	Unigene0056884	0.1328	37.5151	8.14207	9.82512e-06	0.00116463	--	PREDICTED: keratin, type II cytoskeletal 1-like [Anoplophora glabripennis]	-	-	-	-	-	-	-
miR-101-y	54.6432	7.71453	-2.82439	0.000516992	Unigene0057020	42.3286	89.9525	1.08753	1.28813e-05	0.00146639	--	PREDICTED: ras guanine nucleotide exchange factor P-like [Diaphorina citri]	-	-	-	-	-	-	-
miR-101-y	54.6432	7.71453	-2.82439	0.000516992	Unigene0057030	0.403033	1.2617	1.6464	0.000163521	0.0113852	HPD	PREDICTED: 4-hydroxyphenylpyruvate dioxygenase [Cimex lectularius]	Metabolism	Metabolism of cofactors and vitamins;Amino acid metabolism;Global and overview maps	ko01100//Metabolic pathways;ko00350//Tyrosine metabolism ;ko00360//Phenylalanine metabolism ;ko00130//Ubiquinone and other terpenoid-quinone biosynthesis	K00457	-	GO:0016491//oxidoreductase activity;GO:0043169//cation binding	GO:0006520//cellular amino acid metabolic process
miR-101-y	54.6432	7.71453	-2.82439	0.000516992	Unigene0057775	6.43987	14.5438	1.1753	5.83967e-06	0.00076246	--	PREDICTED: storkhead-box protein 2 isoform X2 [Megachile rotundata]	-	-	-	-	-	-	-
miR-101-y	54.6432	7.71453	-2.82439	0.000516992	Unigene0059154	13.8135	38.09	1.46334	2.50893e-09	7.65161e-07	Creg1	Protein CREG1 [Zootermopsis nevadensis]	-	-	-	-	-	-	-
miR-101-y	54.6432	7.71453	-2.82439	0.000516992	Unigene0059582	0.4167	8.8134	4.40262	1.72048e-08	4.4738e-06	Sb	trypsin-7 [Nilaparvata lugens]	-	-	-	-	-	GO:0004175//endopeptidase activity	GO:0019538//protein metabolic process
miR-101-y	54.6432	7.71453	-2.82439	0.000516992	Unigene0059721	3.4873	23.7964	2.77056	1.06481e-14	8.43076e-12	--	AGAP002550-PA [Anopheles gambiae str. PEST] [Anopheles gambiae]	-	-	-	-	-	-	-
miR-101-y	54.6432	7.71453	-2.82439	0.000516992	Unigene0059825	0.8207	3.3537	2.03083	1.41701e-10	5.40191e-08	LCP17	PREDICTED: endocuticle structural glycoprotein SgAbd-2-like isoform X1 [Agrilus planipennis]	-	-	-	-	-	-	-
miR-101-y	54.6432	7.71453	-2.82439	0.000516992	Unigene0062015	3.93237	8.3073	1.07898	2.52182e-05	0.00257636	Rsl1d1	Ribosomal L1 domain-containing protein 1 [Zootermopsis nevadensis]	-	-	-	-	-	-	-
miR-101-y	54.6432	7.71453	-2.82439	0.000516992	Unigene0062211	6.69353	13.5747	1.02008	3.90898e-05	0.00367721	PIK3AP1	Phosphoinositide 3-kinase adapter protein 1, partial [Zootermopsis nevadensis]	-	-	-	-	-	-	-
miR-101-y	54.6432	7.71453	-2.82439	0.000516992	Unigene0062477	10.239	36.4178	1.83056	4.8805e-11	2.05039e-08	Sox11	Transcription factor Sox-11-A [Zootermopsis nevadensis]	-	-	-	-	-	-	-
miR-101-y	54.6432	7.71453	-2.82439	0.000516992	Unigene0062571	4.6532	16.5872	1.83377	6.68959e-13	3.84309e-10	--	PREDICTED: protein eva-1 isoform X4 [Nicrophorus vespilloides]	-	-	-	-	-	-	-
miR-101-y	54.6432	7.71453	-2.82439	0.000516992	Unigene0064382	13.9801	40.2775	1.5266	2.32694e-09	7.1318e-07	tubb1	beta-tubulin 4 [Nilaparvata lugens]	Cellular Processes	Transport and catabolism	ko04145//Phagosome	K07375	-	-	-
miR-101-y	54.6432	7.71453	-2.82439	0.000516992	Unigene0064477	10.8912	23.8707	1.13208	5.11377e-05	0.0045343	--	hypothetical protein L798_09464 [Zootermopsis nevadensis]	-	-	-	-	-	-	-
miR-101-y	54.6432	7.71453	-2.82439	0.000516992	Unigene0068296	2.21887	5.25447	1.24372	5.85846e-06	0.000764105	--	hypothetical protein L798_14034 [Zootermopsis nevadensis]	-	-	-	-	-	-	-
miR-101-y	54.6432	7.71453	-2.82439	0.000516992	Unigene0069758	4.47567	9.00657	1.00887	5.07922e-05	0.00451338	abcb6	ATP-binding cassette sub-family B member 6, mitochondrial [Zootermopsis nevadensis]	Environmental Information Processing	Membrane transport	ko02010//ABC transporters	K05661	-	-	-
miR-101-y	54.6432	7.71453	-2.82439	0.000516992	Unigene0070492	5.088	10.698	1.07217	4.96891e-05	0.00444413	ASH1L	PREDICTED: histone-lysine N-methyltransferase ash1 isoform X2 [Cimex lectularius]	Metabolism	Amino acid metabolism	ko00310//Lysine degradation	K06101	-	GO:0005488//binding;GO:0016740//transferase activity	-
miR-101-y	54.6432	7.71453	-2.82439	0.000516992	Unigene0070778	0.366167	53.1106	7.18036	7.26372e-06	0.000911973	--	osiris 19 [Danaus plexippus]	-	-	-	-	-	-	-
miR-101-y	54.6432	7.71453	-2.82439	0.000516992	Unigene0071660	1.36	3.33333	1.29336	3.73303e-05	0.00354409	--	IP22107p, partial [Drosophila melanogaster]	-	-	-	-	-	-	-
miR-101-y	54.6432	7.71453	-2.82439	0.000516992	Unigene0071775	3.6217	8.29333	1.19529	3.26064e-06	0.000461326	mlec	Malectin-B [Zootermopsis nevadensis]	-	-	-	-	-	-	-
miR-101-y	54.6432	7.71453	-2.82439	0.000516992	Unigene0071973	323.181	1070.43	1.72778	2.12294e-07	4.07398e-05	--	Ejaculatory bulb-specific protein 3 [Zootermopsis nevadensis]	-	-	-	-	-	-	-
miR-101-y	54.6432	7.71453	-2.82439	0.000516992	Unigene0072081	1.0436	3.0214	1.53365	0.000536789	0.0283947	--	hypothetical protein L798_02999 [Zootermopsis nevadensis]	-	-	-	-	-	-	-
miR-101-y	54.6432	7.71453	-2.82439	0.000516992	Unigene0072935	0.155433	0.525267	1.75675	0.000459642	0.025266	HINFP	Histone H4 transcription factor [Zootermopsis nevadensis]	-	-	-	-	-	-	-
miR-101-y	54.6432	7.71453	-2.82439	0.000516992	Unigene0073429	1.56337	3.8765	1.3101	0.000996495	0.0444661	F11	PREDICTED: proclotting enzyme-like [Bemisia tabaci]	-	-	-	-	-	-	-
miR-101-y	54.6432	7.71453	-2.82439	0.000516992	Unigene0074012	324.781	1471.75	2.17999	1.69605e-14	1.29313e-11	--	Leucine-rich repeat-containing protein 20 [Zootermopsis nevadensis]	-	-	-	-	-	-	-
miR-101-y	54.6432	7.71453	-2.82439	0.000516992	Unigene0074083	4.76617	9.73917	1.03097	0.000120601	0.00895733	--	L-isoaspartate(D-aspartate) O-methyltransferase [Daphnia magna]	-	-	-	-	-	-	-
miR-101-y	54.6432	7.71453	-2.82439	0.000516992	Unigene0074261	357.29	851.187	1.25238	2.98134e-05	0.00292952	to	Protein takeout [Zootermopsis nevadensis]	-	-	-	-	-	-	-
miR-101-y	54.6432	7.71453	-2.82439	0.000516992	Unigene0074297	0.619433	1.35083	1.12483	0.00115769	0.0498576	--	Retinoblastoma-like protein 2 [Zootermopsis nevadensis]	-	-	-	-	-	-	-
miR-101-y	54.6432	7.71453	-2.82439	0.000516992	Unigene0076022	458.57	1046.52	1.19039	0.000300843	0.0181895	PebIII	serine/threonine protein kinase [Coptotermes formosanus]	-	-	-	-	-	-	-
miR-101-y	54.6432	7.71453	-2.82439	0.000516992	Unigene0076182	48.9193	104.611	1.09656	3.4155e-05	0.00328555	Tret1	Solute carrier family 2, facilitated glucose transporter member 8 [Zootermopsis nevadensis]	-	-	-	-	GO:0016020//membrane	GO:0022857//transmembrane transporter activity	GO:0044765//single-organism transport
miR-101-y	54.6432	7.71453	-2.82439	0.000516992	Unigene0076411	1.70873	4.10457	1.2643	1.55565e-05	0.00170797	NHP2	H/ACA ribonucleoprotein complex subunit 2-like protein [Zootermopsis nevadensis]	Genetic Information Processing	Translation	ko03008//Ribosome biogenesis in eukaryotes	K11129	-	-	-
miR-101-y	54.6432	7.71453	-2.82439	0.000516992	Unigene0078427	1.59387	4.2131	1.40235	9.09668e-07	0.000149412	RWDD2A	RWD domain-containing protein 2A [Zootermopsis nevadensis]	-	-	-	-	-	-	-
miR-101-y	54.6432	7.71453	-2.82439	0.000516992	Unigene0080190	0.281133	11.4669	5.35008	9.84728e-05	0.00762597	--	hypothetical protein L798_03153 [Zootermopsis nevadensis]	-	-	-	-	-	-	-
miR-103-y	12.2193	1.32373	-3.20648	0.00349642	Unigene0000793	0.705767	5.73307	3.02204	4.53817e-05	0.00414026	--	PREDICTED: LOW QUALITY PROTEIN: adhesive plaque matrix protein [Aethina tumida]	-	-	-	-	-	-	-
miR-103-y	12.2193	1.32373	-3.20648	0.00349642	Unigene0000972	3.5954	10.021	1.4788	1.76111e-06	0.000267556	Gyc32E	Guanylate cyclase 32E, partial [Zootermopsis nevadensis]	-	-	-	-	-	-	-
miR-103-y	12.2193	1.32373	-3.20648	0.00349642	Unigene0001123	5.67737	12.3958	1.12656	1.29497e-05	0.00146876	--	endonuclease-reverse transcriptase [Blattella germanica]	-	-	-	-	-	-	-
miR-103-y	12.2193	1.32373	-3.20648	0.00349642	Unigene0001636	2.5542	6.38673	1.32221	1.60163e-07	3.18048e-05	hgh1	Brain protein 16 [Zootermopsis nevadensis]	-	-	-	-	-	-	-
miR-103-y	12.2193	1.32373	-3.20648	0.00349642	Unigene0001848	2.1059	4.2861	1.02523	9.82357e-05	0.00761836	osgep	PREDICTED: probable tRNA N6-adenosine threonylcarbamoyltransferase [Anoplophora glabripennis]	-	-	-	-	GO:0044424//intracellular part	GO:0016746//transferase activity, transferring acyl groups;GO:0043169//cation binding	GO:0006400//tRNA modification
miR-103-y	12.2193	1.32373	-3.20648	0.00349642	Unigene0003550	1.6228	4.32087	1.41284	7.65509e-05	0.00630358	--	hypothetical protein [Coptotermes formosanus]	-	-	-	-	-	-	-
miR-103-y	12.2193	1.32373	-3.20648	0.00349642	Unigene0005553	1.73357	4.47997	1.36974	8.2194e-06	0.00101218	--	hypothetical protein g.3467, partial [Graphocephala atropunctata]	-	-	-	-	-	-	-
miR-103-y	12.2193	1.32373	-3.20648	0.00349642	Unigene0005998	5.99127	12.4726	1.05783	4.59602e-05	0.00417717	Nelf-E	Negative elongation factor E [Zootermopsis nevadensis]	-	-	-	-	-	GO:0008135//translation factor activity, RNA binding	GO:0034645//cellular macromolecule biosynthetic process
miR-103-y	12.2193	1.32373	-3.20648	0.00349642	Unigene0007992	11.0492	22.5135	1.02685	2.70308e-05	0.00272104	eRF1	Eukaryotic peptide chain release factor subunit 1 [Zootermopsis nevadensis]	Genetic Information Processing	Translation	ko03015//mRNA surveillance pathway	K03265	-	GO:0003747//translation release factor activity	GO:0043624//cellular protein complex disassembly
miR-103-y	12.2193	1.32373	-3.20648	0.00349642	Unigene0008360	3.29603	11.9306	1.85587	3.80386e-09	1.11072e-06	PCP36	PREDICTED: pupal cuticle protein 20 [Tribolium castaneum]	-	-	-	-	-	-	-
miR-103-y	12.2193	1.32373	-3.20648	0.00349642	Unigene0010072	12.7435	26.7263	1.06849	3.45115e-05	0.00331726	ZFAND6	PREDICTED: mucin-3A isoform X2 [Acyrthosiphon pisum]	-	-	-	-	-	-	-
miR-103-y	12.2193	1.32373	-3.20648	0.00349642	Unigene0011672	7.05787	42.5005	2.59018	5.45781e-10	1.86737e-07	TLL1	Dorsal-ventral patterning tolloid-like protein 1, partial [Zootermopsis nevadensis]	-	-	-	-	-	-	-
miR-103-y	12.2193	1.32373	-3.20648	0.00349642	Unigene0012084	28.6023	80.772	1.49772	6.25142e-09	1.75089e-06	slc36a4	PREDICTED: proton-coupled amino acid transporter 1-like isoform X3 [Halyomorpha halys]	-	-	-	-	-	-	-
miR-103-y	12.2193	1.32373	-3.20648	0.00349642	Unigene0014003	13.0964	27.5702	1.07394	4.07266e-05	0.0038051	celD	Endoglucanase F [Zootermopsis nevadensis]	Metabolism	Global and overview maps;Carbohydrate metabolism	ko01100//Metabolic pathways;ko00520//Amino sugar and nucleotide sugar metabolism ;ko00500//Starch and sucrose metabolism	K01179	GO:0031224//intrinsic component of membrane	GO:0004553//hydrolase activity, hydrolyzing O-glycosyl compounds	GO:0030243//cellulose metabolic process
miR-103-y	12.2193	1.32373	-3.20648	0.00349642	Unigene0014010	13.8877	36.1098	1.37858	6.63723e-08	1.47711e-05	twk-7	PREDICTED: TWiK family of potassium channels protein 7-like [Dufourea novaeangliae]	-	-	-	-	-	-	-
miR-103-y	12.2193	1.32373	-3.20648	0.00349642	Unigene0014629	0.211367	0.7032	1.73419	0.00112977	0.0489453	AURKB	Serine/threonine-protein kinase 12 [Zootermopsis nevadensis]	-	-	-	-	-	GO:0004672//protein kinase activity	-
miR-103-y	12.2193	1.32373	-3.20648	0.00349642	Unigene0032222	0.473233	1.47073	1.63591	5.47629e-05	0.00479261	--	hypothetical protein L798_06094 [Zootermopsis nevadensis]	-	-	-	-	-	-	-
miR-103-y	12.2193	1.32373	-3.20648	0.00349642	Unigene0034316	0.982433	21.3299	4.44037	0.000493478	0.0266282	--	PREDICTED: proline-rich protein 4-like [Nicrophorus vespilloides]	-	-	-	-	-	-	-
miR-103-y	12.2193	1.32373	-3.20648	0.00349642	Unigene0040109	0.8119	1.666	1.03701	0.000993429	0.0443773	--	Rho GTPase-activating protein 11A [Zootermopsis nevadensis]	-	-	-	-	-	-	-
miR-103-y	12.2193	1.32373	-3.20648	0.00349642	Unigene0044636	0.5683	3.91823	2.78548	3.21885e-12	1.68464e-09	AGAP002721	PREDICTED: tryptophan 2,3-dioxygenase [Nicrophorus vespilloides]	Metabolism	Amino acid metabolism;Global and overview maps	ko01100//Metabolic pathways;ko00380//Tryptophan metabolism	K00453	-	-	-
miR-103-y	12.2193	1.32373	-3.20648	0.00349642	Unigene0044835	0.802033	2.13193	1.41043	0.000301158	0.0181984	Actbeta	PREDICTED: inhibin beta chain [Bemisia tabaci]	Environmental Information Processing	Signal transduction	ko04350//TGF-beta signaling pathway	K22687	-	-	-
miR-103-y	12.2193	1.32373	-3.20648	0.00349642	Unigene0045529	0.3205	4.92387	3.9414	2.876e-18	3.77903e-15	--	PREDICTED: mucin-5AC [Bemisia tabaci]	-	-	-	-	-	-	-
miR-103-y	12.2193	1.32373	-3.20648	0.00349642	Unigene0047779	2.82043	6.02987	1.09621	5.84879e-05	0.00504831	--	hypothetical protein L798_00845 [Zootermopsis nevadensis]	-	-	-	-	-	-	-
miR-103-y	12.2193	1.32373	-3.20648	0.00349642	Unigene0048010	0.0193333	2.38197	6.94492	4.39877e-05	0.00404143	--	--	-	-	-	-	-	-	-
miR-103-y	12.2193	1.32373	-3.20648	0.00349642	Unigene0048331	0.686367	1.79593	1.38768	0.000126944	0.00932191	--	conserved Plasmodium protein, unknown function [Plasmodium vivax]	-	-	-	-	-	-	-
miR-103-y	12.2193	1.32373	-3.20648	0.00349642	Unigene0048884	0.159867	3.1238	4.28836	5.67072e-14	3.86972e-11	--	--	-	-	-	-	-	-	-
miR-103-y	12.2193	1.32373	-3.20648	0.00349642	Unigene0048910	4.5773	9.95963	1.1216	3.3284e-05	0.0032168	CG2614	Methyltransferase-like protein 13 [Zootermopsis nevadensis]	-	-	-	-	-	-	-
miR-103-y	12.2193	1.32373	-3.20648	0.00349642	Unigene0049515	3.5774	11.7483	1.71547	2.72112e-06	0.000394019	YPEL1	PREDICTED: protein yippee-like 2 [Bemisia tabaci]	-	-	-	-	-	-	-
miR-103-y	12.2193	1.32373	-3.20648	0.00349642	Unigene0049525	7.60823	33.7861	2.1508	1.08226e-15	1.03624e-12	h	Hairy protein [Periplaneta americana]	-	-	-	-	-	-	-
miR-103-y	12.2193	1.32373	-3.20648	0.00349642	Unigene0049561	3.12367	7.60997	1.28465	8.05426e-06	0.000994821	sgl	UDP-glucose 6-dehydrogenase [Zootermopsis nevadensis]	Metabolism	Global and overview maps;Carbohydrate metabolism	ko01100//Metabolic pathways;ko00040//Pentose and glucuronate interconversions ;ko00520//Amino sugar and nucleotide sugar metabolism ;ko00053//Ascorbate and aldarate metabolism	K00012	-	GO:0000166//nucleotide binding;GO:0016614//oxidoreductase activity, acting on CH-OH group of donors	GO:0044710//single-organism metabolic process
miR-103-y	12.2193	1.32373	-3.20648	0.00349642	Unigene0050437	13.0072	42.7001	1.71492	3.617e-11	1.5842e-08	--	P-selectin [Zootermopsis nevadensis]	-	-	-	-	-	-	-
miR-103-y	12.2193	1.32373	-3.20648	0.00349642	Unigene0050707	5.36	39.7869	2.89199	2.2581e-21	4.35796e-18	Gadd45a	Growth arrest and DNA-damage-inducible protein GADD45 gamma [Zootermopsis nevadensis]	Environmental Information Processing	Signal transduction	ko04010//MAPK signaling pathway ;ko04068//FoxO signaling pathway	K04402	-	-	-
miR-103-y	12.2193	1.32373	-3.20648	0.00349642	Unigene0050825	1.92777	4.17357	1.11435	0.000189688	0.012761	Mcm6	DNA replication licensing factor Mcm6 [Zootermopsis nevadensis]	Genetic Information Processing	Replication and repair	ko03030//DNA replication	K02542	GO:0043231//intracellular membrane-bounded organelle;GO:0043234//protein complex	GO:0003676//nucleic acid binding;GO:0004386//helicase activity;GO:0032550//purine ribonucleoside binding	GO:0006259//DNA metabolic process;GO:0032392//DNA geometric change
miR-103-y	12.2193	1.32373	-3.20648	0.00349642	Unigene0051718	10.9301	28.9282	1.40417	1.10014e-07	2.29534e-05	ITIH4	PREDICTED: inter-alpha-trypsin inhibitor heavy chain H4-like [Halyomorpha halys]	-	-	-	-	-	-	-
miR-103-y	12.2193	1.32373	-3.20648	0.00349642	Unigene0051736	4.77793	22.4584	2.2328	9.44148e-15	7.62199e-12	hes4-a	Transcription factor HES-4-A [Zootermopsis nevadensis]	-	-	-	-	-	-	-
miR-103-y	12.2193	1.32373	-3.20648	0.00349642	Unigene0052207	6.2589	20.5978	1.71851	7.44855e-11	3.02634e-08	AGPAT1	1-acyl-sn-glycerol-3-phosphate acyltransferase alpha [Zootermopsis nevadensis]	Metabolism	Lipid metabolism;Global and overview maps	ko01100//Metabolic pathways;ko00564//Glycerophospholipid metabolism ;ko00561//Glycerolipid metabolism	K13509	-	GO:0016740//transferase activity	GO:0006629//lipid metabolic process
miR-103-y	12.2193	1.32373	-3.20648	0.00349642	Unigene0052303	8.92197	21.5162	1.26999	0.000410955	0.0231565	MMEL1	Membrane metallo-endopeptidase-like 1 [Zootermopsis nevadensis]	-	-	-	-	-	GO:0070011//peptidase activity, acting on L-amino acid peptides	GO:0019538//protein metabolic process
miR-103-y	12.2193	1.32373	-3.20648	0.00349642	Unigene0053858	2.17043	6.27943	1.53265	1.86805e-06	0.000282761	CCND2	PREDICTED: G1/S-specific cyclin-D2 [Neodiprion lecontei]	Environmental Information Processing	Signal transduction	ko04310//Wnt signaling pathway ;ko04068//FoxO signaling pathway	K10151	-	-	-
miR-103-y	12.2193	1.32373	-3.20648	0.00349642	Unigene0055429	18.6865	62.3222	1.73775	3.16388e-11	1.40067e-08	NFIX	PREDICTED: nuclear factor 1 X-type isoform X4 [Bemisia tabaci]	-	-	-	-	-	-	-
miR-103-y	12.2193	1.32373	-3.20648	0.00349642	Unigene0055459	1.01217	9.84203	3.28151	4.42427e-05	0.00405991	KLKB1	seminal fluid protein CSSFP033 [Chilo suppressalis]	-	-	-	-	-	-	-
miR-103-y	12.2193	1.32373	-3.20648	0.00349642	Unigene0055978	17.6549	53.807	1.60772	2.01007e-10	7.52343e-08	--	PREDICTED: ankyrin repeat and SOCS box protein 14-like [Bemisia tabaci]	-	-	-	-	-	-	-
miR-103-y	12.2193	1.32373	-3.20648	0.00349642	Unigene0056609	4.4568	10.9774	1.30046	1.29473e-05	0.00146876	--	PREDICTED: sodium channel protein Nach-like [Cimex lectularius]	-	-	-	-	-	-	-
miR-103-y	12.2193	1.32373	-3.20648	0.00349642	Unigene0056652	17.4319	39.6782	1.18661	4.24778e-06	0.000577188	SERPINB6	Leukocyte elastase inhibitor C [Zootermopsis nevadensis]	-	-	-	-	-	-	-
miR-103-y	12.2193	1.32373	-3.20648	0.00349642	Unigene0056734	16.4333	34.8725	1.08547	8.34645e-06	0.00102448	PSMA1	Proteasome subunit alpha type-1 [Zootermopsis nevadensis]	Genetic Information Processing	Folding, sorting and degradation	ko03050//Proteasome	K02725	-	-	-
miR-103-y	12.2193	1.32373	-3.20648	0.00349642	Unigene0058520	7.2002	16.8883	1.22992	3.38918e-06	0.000476239	Nurf-38	inorganic pyrophosphatase, partial [Coptotermes formosanus]	Metabolism	Energy metabolism	ko00190//Oxidative phosphorylation	K11726	GO:0044424//intracellular part	GO:0016462//pyrophosphatase activity	GO:0006793//phosphorus metabolic process
miR-103-y	12.2193	1.32373	-3.20648	0.00349642	Unigene0059502	0.277067	2.91853	3.39694	4.80014e-05	0.00431506	--	PREDICTED: zinc finger BED domain-containing protein 5-like [Parasteatoda tepidariorum]	-	-	-	-	-	-	-
miR-103-y	12.2193	1.32373	-3.20648	0.00349642	Unigene0060481	0.658467	6.1772	3.22977	0.000780973	0.0376363	--	AAEL010623-PA [Aedes aegypti]	-	-	-	-	-	-	-
miR-103-y	12.2193	1.32373	-3.20648	0.00349642	Unigene0060492	2.60483	6.4716	1.31293	2.13466e-06	0.000319591	Nol4l	PREDICTED: nucleolar protein 4-like isoform X3 [Aethina tumida]	-	-	-	-	-	-	-
miR-103-y	12.2193	1.32373	-3.20648	0.00349642	Unigene0063640	0.859867	1.80147	1.06699	0.000619714	0.0316036	E2f7	Transcription factor E2F7 [Zootermopsis nevadensis]	-	-	-	-	-	-	-
miR-103-y	12.2193	1.32373	-3.20648	0.00349642	Unigene0065153	0.8471	2.35287	1.47382	1.02242e-05	0.00120385	--	Thyroid adenoma-associated protein-like protein [Zootermopsis nevadensis]	-	-	-	-	-	-	-
miR-103-y	12.2193	1.32373	-3.20648	0.00349642	Unigene0065387	26.3922	59.1841	1.1651	3.20548e-06	0.000455086	HSD17B13	Epidermal retinal dehydrogenase 2 [Zootermopsis nevadensis]	-	-	-	-	-	-	-
miR-103-y	12.2193	1.32373	-3.20648	0.00349642	Unigene0065410	11.3147	23.0624	1.02734	2.70927e-05	0.0027229	CdGAPr	PREDICTED: GTPase-activating protein CdGAPr isoform X1 [Cephus cinctus]	-	-	-	-	-	-	-
miR-103-y	12.2193	1.32373	-3.20648	0.00349642	Unigene0067793	4.89853	21.5688	2.13852	4.59066e-14	3.22168e-11	Suco	PREDICTED: SUN domain-containing ossification factor [Camponotus floridanus]	-	-	-	-	-	-	-
miR-103-y	12.2193	1.32373	-3.20648	0.00349642	Unigene0068590	66.6932	366.884	2.45971	5.13836e-20	8.2424e-17	--	endonuclease-reverse transcriptase [Blattella germanica]	-	-	-	-	-	-	-
miR-103-y	12.2193	1.32373	-3.20648	0.00349642	Unigene0070119	5.61073	15.4143	1.45801	4.33319e-06	0.000585573	col2a1	PREDICTED: fibril-forming collagen alpha chain-like [Neodiprion lecontei]	Environmental Information Processing	Signaling molecules and interaction	ko04512//ECM-receptor interaction	K19719	-	-	-
miR-103-y	12.2193	1.32373	-3.20648	0.00349642	Unigene0071775	3.6217	8.29333	1.19529	3.26064e-06	0.000461326	mlec	Malectin-B [Zootermopsis nevadensis]	-	-	-	-	-	-	-
miR-103-y	12.2193	1.32373	-3.20648	0.00349642	Unigene0072284	14.4483	42.4809	1.55591	9.53368e-08	2.01291e-05	AAEL008004	Elongation of very long chain fatty acids protein [Zootermopsis nevadensis]	-	-	-	-	GO:0016020//membrane	-	GO:0006631//fatty acid metabolic process
miR-103-y	12.2193	1.32373	-3.20648	0.00349642	Unigene0073093	2.9384	19.0661	2.6979	2.06618e-16	2.23863e-13	--	--	-	-	-	-	-	-	-
miR-103-y	12.2193	1.32373	-3.20648	0.00349642	Unigene0073516	0.24	18.5491	6.27217	1.52819e-06	0.000236831	--	PREDICTED: splicing factor, arginine/serine-rich 15-like [Bemisia tabaci]	-	-	-	-	-	-	-
miR-103-y	12.2193	1.32373	-3.20648	0.00349642	Unigene0076182	48.9193	104.611	1.09656	3.4155e-05	0.00328555	Tret1	Solute carrier family 2, facilitated glucose transporter member 8 [Zootermopsis nevadensis]	-	-	-	-	GO:0016020//membrane	GO:0022857//transmembrane transporter activity	GO:0044765//single-organism transport
miR-106-x	2.43893	0.319533	-2.93221	0.0373424	Unigene0001636	2.5542	6.38673	1.32221	1.60163e-07	3.18048e-05	hgh1	Brain protein 16 [Zootermopsis nevadensis]	-	-	-	-	-	-	-
miR-106-x	2.43893	0.319533	-2.93221	0.0373424	Unigene0003691	3.84043	9.05497	1.23744	1.01013e-06	0.000164166	GRIK2	PREDICTED: glutamate receptor ionotropic, kainate 2 isoform X2 [Tribolium castaneum]	-	-	-	-	GO:0031224//intrinsic component of membrane;GO:0097060//synaptic membrane	GO:0005231//excitatory extracellular ligand-gated ion channel activity	GO:0006811//ion transport;GO:0007215//glutamate receptor signaling pathway
miR-106-x	2.43893	0.319533	-2.93221	0.0373424	Unigene0004413	2.69953	13.0508	2.27335	2.03031e-14	1.52911e-11	Cyp6a14	cytochrome P450 [Hodotermopsis sjostedti]	-	-	-	-	-	GO:0016712//oxidoreductase activity, acting on paired donors, with incorporation or reduction of molecular oxygen, reduced flavin or flavoprotein as one donor, and incorporation of one atom of oxygen;GO:0046906//tetrapyrrole binding;GO:0046914//transition metal ion binding	GO:0044710//single-organism metabolic process
miR-106-x	2.43893	0.319533	-2.93221	0.0373424	Unigene0005553	1.73357	4.47997	1.36974	8.2194e-06	0.00101218	--	hypothetical protein g.3467, partial [Graphocephala atropunctata]	-	-	-	-	-	-	-
miR-106-x	2.43893	0.319533	-2.93221	0.0373424	Unigene0005733	9.52103	40.8393	2.10077	6.97205e-16	7.00124e-13	mariner\T	PREDICTED: histone-lysine N-methyltransferase SETMAR-like [Trachymyrmex septentrionalis]	Metabolism	Amino acid metabolism	ko00310//Lysine degradation	K11433	-	-	-
miR-106-x	2.43893	0.319533	-2.93221	0.0373424	Unigene0005937	0.884967	2.76893	1.64564	1.8624e-05	0.00199857	--	Transposable element Tc3 transposase [Anoplophora glabripennis]	-	-	-	-	-	-	-
miR-106-x	2.43893	0.319533	-2.93221	0.0373424	Unigene0007263	5.3711	11.285	1.07111	7.99372e-05	0.00649142	per	Period circadian protein [Zootermopsis nevadensis]	Organismal Systems	Environmental adaptation	ko04711//Circadian rhythm - fly	K02633	-	-	-
miR-106-x	2.43893	0.319533	-2.93221	0.0373424	Unigene0008298	4.08483	8.83737	1.11334	3.75518e-05	0.00355964	trmt10c	Mitochondrial ribonuclease P protein 1-like protein [Zootermopsis nevadensis]	-	-	-	-	-	-	-
miR-106-x	2.43893	0.319533	-2.93221	0.0373424	Unigene0008361	0.001	1.24213	10.2786	0.000981953	0.0440341	--	membrane protein [Tritrichomonas foetus]	-	-	-	-	-	-	-
miR-106-x	2.43893	0.319533	-2.93221	0.0373424	Unigene0008365	4.03787	10.0844	1.32046	2.11896e-07	4.07398e-05	TFAP2B	PREDICTED: transcription factor AP-2-epsilon isoform X2 [Megachile rotundata]	-	-	-	-	GO:0043231//intracellular membrane-bounded organelle	-	GO:0010468//regulation of gene expression
miR-106-x	2.43893	0.319533	-2.93221	0.0373424	Unigene0011525	14.6845	33.7571	1.20089	3.23821e-06	0.000458678	Zc2hc1b	PREDICTED: zinc finger C2HC domain-containing protein 1C-like [Aethina tumida]	-	-	-	-	-	-	-
miR-106-x	2.43893	0.319533	-2.93221	0.0373424	Unigene0012019	29.8838	62.9231	1.07423	2.72721e-05	0.00273261	msta	Protein msta, isoform B [Zootermopsis nevadensis]	-	-	-	-	-	-	-
miR-106-x	2.43893	0.319533	-2.93221	0.0373424	Unigene0013587	3.1894	10.5935	1.73182	2.49757e-11	1.12999e-08	--	Peptidyl-prolyl cis-trans isomerase SDCCAG10, partial [Zootermopsis nevadensis]	-	-	-	-	-	-	-
miR-106-x	2.43893	0.319533	-2.93221	0.0373424	Unigene0014003	13.0964	27.5702	1.07394	4.07266e-05	0.0038051	celD	Endoglucanase F [Zootermopsis nevadensis]	Metabolism	Global and overview maps;Carbohydrate metabolism	ko01100//Metabolic pathways;ko00520//Amino sugar and nucleotide sugar metabolism ;ko00500//Starch and sucrose metabolism	K01179	GO:0031224//intrinsic component of membrane	GO:0004553//hydrolase activity, hydrolyzing O-glycosyl compounds	GO:0030243//cellulose metabolic process
miR-106-x	2.43893	0.319533	-2.93221	0.0373424	Unigene0014010	13.8877	36.1098	1.37858	6.63723e-08	1.47711e-05	twk-7	PREDICTED: TWiK family of potassium channels protein 7-like [Dufourea novaeangliae]	-	-	-	-	-	-	-
miR-106-x	2.43893	0.319533	-2.93221	0.0373424	Unigene0014042	0.0137	3.87963	8.1456	0.000279241	0.0171509	--	AGAP013195-PA [Anopheles gambiae str. PEST] [Anopheles gambiae]	-	-	-	-	-	-	-
miR-106-x	2.43893	0.319533	-2.93221	0.0373424	Unigene0014266	50.8585	119.316	1.23023	3.53325e-07	6.43671e-05	Sam-S	S-adenosylmethionine synthetase [Zootermopsis nevadensis]	Metabolism	Amino acid metabolism;Global and overview maps	ko01100//Metabolic pathways;ko01230//Biosynthesis of amino acids;ko00270//Cysteine and methionine metabolism	K00789	-	-	-
miR-106-x	2.43893	0.319533	-2.93221	0.0373424	Unigene0040062	0.894033	6.86453	2.94076	7.93089e-05	0.00645516	COLEC12	Brevican core protein, partial [Zootermopsis nevadensis]	-	-	-	-	-	-	-
miR-106-x	2.43893	0.319533	-2.93221	0.0373424	Unigene0042219	8.191	25.9254	1.66225	0.000138278	0.00995656	--	prolixicin antimicrobial protein [Coptotermes formosanus]	-	-	-	-	-	-	-
miR-106-x	2.43893	0.319533	-2.93221	0.0373424	Unigene0044789	0.495133	1.64337	1.73077	0.000226697	0.0147216	--	Mite allergen Lep d 7 [Zootermopsis nevadensis]	-	-	-	-	-	-	-
miR-106-x	2.43893	0.319533	-2.93221	0.0373424	Unigene0045529	0.3205	4.92387	3.9414	2.876e-18	3.77903e-15	--	PREDICTED: mucin-5AC [Bemisia tabaci]	-	-	-	-	-	-	-
miR-106-x	2.43893	0.319533	-2.93221	0.0373424	Unigene0047040	1.16037	4.03847	1.79923	2.12034e-10	7.86467e-08	--	reverse transcriptase [Bactrocera tryoni]	-	-	-	-	-	-	-
miR-106-x	2.43893	0.319533	-2.93221	0.0373424	Unigene0047597	0.219633	2.49363	3.50508	0.000834776	0.039384	--	ryanodine receptor-like protein [Phlebotomus papatasi]	-	-	-	-	-	-	-
miR-106-x	2.43893	0.319533	-2.93221	0.0373424	Unigene0048058	1.89123	3.91743	1.05058	0.000530589	0.0281632	--	PREDICTED: zinc finger protein 91-like [Octopus bimaculoides]	-	-	-	-	-	-	-
miR-106-x	2.43893	0.319533	-2.93221	0.0373424	Unigene0048675	0.1957	6.02907	4.94522	0.000229759	0.0148813	--	PREDICTED: chondroitin proteoglycan 1-like [Agrilus planipennis]	-	-	-	-	-	-	-
miR-106-x	2.43893	0.319533	-2.93221	0.0373424	Unigene0048884	0.159867	3.1238	4.28836	5.67072e-14	3.86972e-11	--	--	-	-	-	-	-	-	-
miR-106-x	2.43893	0.319533	-2.93221	0.0373424	Unigene0049224	9.4626	69.5989	2.87876	2.84064e-18	3.77271e-15	--	hypothetical protein L798_05444 [Zootermopsis nevadensis]	-	-	-	-	-	-	-
miR-106-x	2.43893	0.319533	-2.93221	0.0373424	Unigene0050175	3.78403	8.14507	1.106	0.000197017	0.0131514	rasl11b	Ras-like protein family member 11B [Zootermopsis nevadensis]	-	-	-	-	-	-	-
miR-106-x	2.43893	0.319533	-2.93221	0.0373424	Unigene0051267	2.14583	4.386	1.03137	0.000307049	0.0184461	--	PREDICTED: SOSS complex subunit C homolog isoform X1 [Acromyrmex echinatior]	-	-	-	-	-	-	-
miR-106-x	2.43893	0.319533	-2.93221	0.0373424	Unigene0051571	0.9954	2.28797	1.20072	4.90191e-05	0.00439376	Mcm7	DNA replication licensing factor MCM7 [Zootermopsis nevadensis]	Genetic Information Processing	Replication and repair	ko03030//DNA replication	K02210	GO:0043231//intracellular membrane-bounded organelle;GO:0043234//protein complex	GO:0003676//nucleic acid binding;GO:0004386//helicase activity;GO:0032550//purine ribonucleoside binding	GO:0006259//DNA metabolic process;GO:0032392//DNA geometric change
miR-106-x	2.43893	0.319533	-2.93221	0.0373424	Unigene0051718	10.9301	28.9282	1.40417	1.10014e-07	2.29534e-05	ITIH4	PREDICTED: inter-alpha-trypsin inhibitor heavy chain H4-like [Halyomorpha halys]	-	-	-	-	-	-	-
miR-106-x	2.43893	0.319533	-2.93221	0.0373424	Unigene0051940	8.04857	17.3779	1.11045	3.13676e-05	0.00305068	nifk	MKI67 FHA domain-interacting nucleolar phosphoprotein-like [Zootermopsis nevadensis]	-	-	-	-	-	-	-
miR-106-x	2.43893	0.319533	-2.93221	0.0373424	Unigene0052303	8.92197	21.5162	1.26999	0.000410955	0.0231565	MMEL1	Membrane metallo-endopeptidase-like 1 [Zootermopsis nevadensis]	-	-	-	-	-	GO:0070011//peptidase activity, acting on L-amino acid peptides	GO:0019538//protein metabolic process
miR-106-x	2.43893	0.319533	-2.93221	0.0373424	Unigene0053514	12.8588	32.1893	1.32382	0.000344697	0.0202643	--	DNA topoisomerase 2-alpha [Orchesella cincta]	-	-	-	-	-	-	-
miR-106-x	2.43893	0.319533	-2.93221	0.0373424	Unigene0053611	5.22413	10.7558	1.04186	6.51059e-05	0.00550274	IPO4	Importin-4, partial [Zootermopsis nevadensis]	-	-	-	-	-	-	-
miR-106-x	2.43893	0.319533	-2.93221	0.0373424	Unigene0056327	1.6315	3.47177	1.08947	6.82871e-05	0.00572995	--	Unhealthy ribosome biogenesis protein 2-like protein [Zootermopsis nevadensis]	-	-	-	-	-	-	-
miR-106-x	2.43893	0.319533	-2.93221	0.0373424	Unigene0056734	16.4333	34.8725	1.08547	8.34645e-06	0.00102448	PSMA1	Proteasome subunit alpha type-1 [Zootermopsis nevadensis]	Genetic Information Processing	Folding, sorting and degradation	ko03050//Proteasome	K02725	-	-	-
miR-106-x	2.43893	0.319533	-2.93221	0.0373424	Unigene0057775	6.43987	14.5438	1.1753	5.83967e-06	0.00076246	--	PREDICTED: storkhead-box protein 2 isoform X2 [Megachile rotundata]	-	-	-	-	-	-	-
miR-106-x	2.43893	0.319533	-2.93221	0.0373424	Unigene0059825	0.8207	3.3537	2.03083	1.41701e-10	5.40191e-08	LCP17	PREDICTED: endocuticle structural glycoprotein SgAbd-2-like isoform X1 [Agrilus planipennis]	-	-	-	-	-	-	-
miR-106-x	2.43893	0.319533	-2.93221	0.0373424	Unigene0060907	83.0885	171.474	1.04527	2.91534e-05	0.0028872	MPDZ	PREDICTED: inaD-like protein [Bemisia tabaci]	-	-	-	-	-	-	-
miR-106-x	2.43893	0.319533	-2.93221	0.0373424	Unigene0063254	5.56083	33.7045	2.59957	1.63952e-19	2.53132e-16	--	AGAP011666-PA, partial [Anopheles gambiae str. PEST] [Anopheles gambiae]	-	-	-	-	-	-	-
miR-106-x	2.43893	0.319533	-2.93221	0.0373424	Unigene0064121	0.379367	1.09133	1.52443	0.000260329	0.0163056	CHIC2	PREDICTED: cysteine-rich hydrophobic domain-containing protein 2 [Neodiprion lecontei]	-	-	-	-	-	-	-
miR-106-x	2.43893	0.319533	-2.93221	0.0373424	Unigene0065114	2.15203	4.8902	1.18419	0.000106522	0.00809166	Sema5b	Semaphorin-5B [Zootermopsis nevadensis]	-	-	-	-	-	-	-
miR-106-x	2.43893	0.319533	-2.93221	0.0373424	Unigene0065387	26.3922	59.1841	1.1651	3.20548e-06	0.000455086	HSD17B13	Epidermal retinal dehydrogenase 2 [Zootermopsis nevadensis]	-	-	-	-	-	-	-
miR-106-x	2.43893	0.319533	-2.93221	0.0373424	Unigene0065755	7.45583	17.3465	1.2182	2.34398e-05	0.00243496	AAEL000263	PREDICTED: zinc finger protein jing [Cerapachys biroi]	-	-	-	-	-	-	-
miR-106-x	2.43893	0.319533	-2.93221	0.0373424	Unigene0068590	66.6932	366.884	2.45971	5.13836e-20	8.2424e-17	--	endonuclease-reverse transcriptase [Blattella germanica]	-	-	-	-	-	-	-
miR-106-x	2.43893	0.319533	-2.93221	0.0373424	Unigene0071540	0.284	1.01807	1.84187	1.41729e-05	0.00157851	--	period [Rhyparobia maderae]	Organismal Systems	Environmental adaptation	ko04711//Circadian rhythm - fly	K02633	-	-	GO:0010468//regulation of gene expression;GO:0050794//regulation of cellular process
miR-106-x	2.43893	0.319533	-2.93221	0.0373424	Unigene0071775	3.6217	8.29333	1.19529	3.26064e-06	0.000461326	mlec	Malectin-B [Zootermopsis nevadensis]	-	-	-	-	-	-	-
miR-106-x	2.43893	0.319533	-2.93221	0.0373424	Unigene0073280	14.5252	43.0512	1.5675	3.47353e-09	1.01908e-06	Sik2	Serine/threonine-protein kinase SIK2 [Zootermopsis nevadensis]	-	-	-	-	-	-	-
miR-106-x	2.43893	0.319533	-2.93221	0.0373424	Unigene0082409	0.0573	0.791733	3.78841	8.43811e-08	1.81574e-05	--	AGAP011943-PA, partial [Anopheles gambiae str. PEST] [Anopheles gambiae]	-	-	-	-	-	-	-
miR-106-y	0.9429	0.01	-6.55903	0.00848248	Unigene0004273	2.39807	10.1769	2.08535	2.8971e-12	1.54239e-09	--	PREDICTED: RNA-directed DNA polymerase from mobile element jockey-like [Linepithema humile]	-	-	-	-	-	-	-
miR-106-y	0.9429	0.01	-6.55903	0.00848248	Unigene0007761	2.40317	11.2756	2.2302	1.62226e-09	5.16425e-07	SUGTL3	Solute carrier family 2, facilitated glucose transporter member 8 [Zootermopsis nevadensis]	-	-	-	-	-	-	-
miR-106-y	0.9429	0.01	-6.55903	0.00848248	Unigene0013050	0.001	4.8724	12.2504	4.19488e-05	0.0038858	--	hypothetical protein [Daphnia magna]	-	-	-	-	-	-	-
miR-106-y	0.9429	0.01	-6.55903	0.00848248	Unigene0013597	0.370067	1.08667	1.55405	0.000872241	0.040502	--	DDE superfamily endonuclease [Nuttalliella namaqua]	-	-	-	-	-	-	-
miR-106-y	0.9429	0.01	-6.55903	0.00848248	Unigene0014682	2.02697	5.0476	1.31628	5.06812e-06	0.000670942	--	AMP deaminase 2 [Zootermopsis nevadensis]	Metabolism	Nucleotide metabolism;Global and overview maps	ko01100//Metabolic pathways;ko00230//Purine metabolism	K01490	-	-	GO:0009168//purine ribonucleoside monophosphate biosynthetic process
miR-106-y	0.9429	0.01	-6.55903	0.00848248	Unigene0051074	8.0671	27.1598	1.75135	7.38522e-09	2.03159e-06	--	Solute carrier family 2, facilitated glucose transporter member 6, partial [Zootermopsis nevadensis]	-	-	-	-	-	-	-
miR-106-y	0.9429	0.01	-6.55903	0.00848248	Unigene0053166	4.05667	9.00323	1.15015	9.01312e-06	0.00108929	PLA2G3	PREDICTED: phospholipase A2-like [Cephus cinctus]	Metabolism	Global and overview maps;Lipid metabolism	ko01100//Metabolic pathways;ko00564//Glycerophospholipid metabolism ;ko00565//Ether lipid metabolism ;ko00590//Arachidonic acid metabolism ;ko00592//alpha-Linolenic acid metabolism ;ko00591//Linoleic acid metabolism	K01047	-	-	-
miR-106-y	0.9429	0.01	-6.55903	0.00848248	Unigene0053340	0.0134333	2.3408	7.44504	0.000252992	0.0159511	--	cyclin-dependent serine threonine-protein kinase [Lasius niger]	-	-	-	-	-	-	-
miR-106-y	0.9429	0.01	-6.55903	0.00848248	Unigene0059394	1.2559	3.99853	1.67075	8.86593e-06	0.00107466	Crisp2	Cysteine-rich secretory protein 2 [Zootermopsis nevadensis]	-	-	-	-	-	-	-
miR-106-y	0.9429	0.01	-6.55903	0.00848248	Unigene0064507	4.19187	11.2092	1.41902	5.43362e-07	9.43929e-05	--	THAP domain-containing protein 9, partial [Stegodyphus mimosarum]	-	-	-	-	-	-	-
miR-106-y	0.9429	0.01	-6.55903	0.00848248	Unigene0067109	16.5921	38.299	1.20681	4.92743e-06	0.000656069	spon1	Spondin-1 [Zootermopsis nevadensis]	-	-	-	-	-	-	-
miR-106-y	0.9429	0.01	-6.55903	0.00848248	Unigene0071775	3.6217	8.29333	1.19529	3.26064e-06	0.000461326	mlec	Malectin-B [Zootermopsis nevadensis]	-	-	-	-	-	-	-
miR-106-y	0.9429	0.01	-6.55903	0.00848248	Unigene0073429	1.56337	3.8765	1.3101	0.000996495	0.0444661	F11	PREDICTED: proclotting enzyme-like [Bemisia tabaci]	-	-	-	-	-	-	-
miR-107-y	12.1449	1.32373	-3.19766	0.00358132	Unigene0000793	0.705767	5.73307	3.02204	4.53817e-05	0.00414026	--	PREDICTED: LOW QUALITY PROTEIN: adhesive plaque matrix protein [Aethina tumida]	-	-	-	-	-	-	-
miR-107-y	12.1449	1.32373	-3.19766	0.00358132	Unigene0000972	3.5954	10.021	1.4788	1.76111e-06	0.000267556	Gyc32E	Guanylate cyclase 32E, partial [Zootermopsis nevadensis]	-	-	-	-	-	-	-
miR-107-y	12.1449	1.32373	-3.19766	0.00358132	Unigene0001123	5.67737	12.3958	1.12656	1.29497e-05	0.00146876	--	endonuclease-reverse transcriptase [Blattella germanica]	-	-	-	-	-	-	-
miR-107-y	12.1449	1.32373	-3.19766	0.00358132	Unigene0001636	2.5542	6.38673	1.32221	1.60163e-07	3.18048e-05	hgh1	Brain protein 16 [Zootermopsis nevadensis]	-	-	-	-	-	-	-
miR-107-y	12.1449	1.32373	-3.19766	0.00358132	Unigene0001848	2.1059	4.2861	1.02523	9.82357e-05	0.00761836	osgep	PREDICTED: probable tRNA N6-adenosine threonylcarbamoyltransferase [Anoplophora glabripennis]	-	-	-	-	GO:0044424//intracellular part	GO:0016746//transferase activity, transferring acyl groups;GO:0043169//cation binding	GO:0006400//tRNA modification
miR-107-y	12.1449	1.32373	-3.19766	0.00358132	Unigene0003550	1.6228	4.32087	1.41284	7.65509e-05	0.00630358	--	hypothetical protein [Coptotermes formosanus]	-	-	-	-	-	-	-
miR-107-y	12.1449	1.32373	-3.19766	0.00358132	Unigene0005553	1.73357	4.47997	1.36974	8.2194e-06	0.00101218	--	hypothetical protein g.3467, partial [Graphocephala atropunctata]	-	-	-	-	-	-	-
miR-107-y	12.1449	1.32373	-3.19766	0.00358132	Unigene0005998	5.99127	12.4726	1.05783	4.59602e-05	0.00417717	Nelf-E	Negative elongation factor E [Zootermopsis nevadensis]	-	-	-	-	-	GO:0008135//translation factor activity, RNA binding	GO:0034645//cellular macromolecule biosynthetic process
miR-107-y	12.1449	1.32373	-3.19766	0.00358132	Unigene0007992	11.0492	22.5135	1.02685	2.70308e-05	0.00272104	eRF1	Eukaryotic peptide chain release factor subunit 1 [Zootermopsis nevadensis]	Genetic Information Processing	Translation	ko03015//mRNA surveillance pathway	K03265	-	GO:0003747//translation release factor activity	GO:0043624//cellular protein complex disassembly
miR-107-y	12.1449	1.32373	-3.19766	0.00358132	Unigene0008360	3.29603	11.9306	1.85587	3.80386e-09	1.11072e-06	PCP36	PREDICTED: pupal cuticle protein 20 [Tribolium castaneum]	-	-	-	-	-	-	-
miR-107-y	12.1449	1.32373	-3.19766	0.00358132	Unigene0010072	12.7435	26.7263	1.06849	3.45115e-05	0.00331726	ZFAND6	PREDICTED: mucin-3A isoform X2 [Acyrthosiphon pisum]	-	-	-	-	-	-	-
miR-107-y	12.1449	1.32373	-3.19766	0.00358132	Unigene0011672	7.05787	42.5005	2.59018	5.45781e-10	1.86737e-07	TLL1	Dorsal-ventral patterning tolloid-like protein 1, partial [Zootermopsis nevadensis]	-	-	-	-	-	-	-
miR-107-y	12.1449	1.32373	-3.19766	0.00358132	Unigene0012084	28.6023	80.772	1.49772	6.25142e-09	1.75089e-06	slc36a4	PREDICTED: proton-coupled amino acid transporter 1-like isoform X3 [Halyomorpha halys]	-	-	-	-	-	-	-
miR-107-y	12.1449	1.32373	-3.19766	0.00358132	Unigene0014003	13.0964	27.5702	1.07394	4.07266e-05	0.0038051	celD	Endoglucanase F [Zootermopsis nevadensis]	Metabolism	Global and overview maps;Carbohydrate metabolism	ko01100//Metabolic pathways;ko00520//Amino sugar and nucleotide sugar metabolism ;ko00500//Starch and sucrose metabolism	K01179	GO:0031224//intrinsic component of membrane	GO:0004553//hydrolase activity, hydrolyzing O-glycosyl compounds	GO:0030243//cellulose metabolic process
miR-107-y	12.1449	1.32373	-3.19766	0.00358132	Unigene0014010	13.8877	36.1098	1.37858	6.63723e-08	1.47711e-05	twk-7	PREDICTED: TWiK family of potassium channels protein 7-like [Dufourea novaeangliae]	-	-	-	-	-	-	-
miR-107-y	12.1449	1.32373	-3.19766	0.00358132	Unigene0014629	0.211367	0.7032	1.73419	0.00112977	0.0489453	AURKB	Serine/threonine-protein kinase 12 [Zootermopsis nevadensis]	-	-	-	-	-	GO:0004672//protein kinase activity	-
miR-107-y	12.1449	1.32373	-3.19766	0.00358132	Unigene0032222	0.473233	1.47073	1.63591	5.47629e-05	0.00479261	--	hypothetical protein L798_06094 [Zootermopsis nevadensis]	-	-	-	-	-	-	-
miR-107-y	12.1449	1.32373	-3.19766	0.00358132	Unigene0034316	0.982433	21.3299	4.44037	0.000493478	0.0266282	--	PREDICTED: proline-rich protein 4-like [Nicrophorus vespilloides]	-	-	-	-	-	-	-
miR-107-y	12.1449	1.32373	-3.19766	0.00358132	Unigene0040109	0.8119	1.666	1.03701	0.000993429	0.0443773	--	Rho GTPase-activating protein 11A [Zootermopsis nevadensis]	-	-	-	-	-	-	-
miR-107-y	12.1449	1.32373	-3.19766	0.00358132	Unigene0044636	0.5683	3.91823	2.78548	3.21885e-12	1.68464e-09	AGAP002721	PREDICTED: tryptophan 2,3-dioxygenase [Nicrophorus vespilloides]	Metabolism	Amino acid metabolism;Global and overview maps	ko01100//Metabolic pathways;ko00380//Tryptophan metabolism	K00453	-	-	-
miR-107-y	12.1449	1.32373	-3.19766	0.00358132	Unigene0044835	0.802033	2.13193	1.41043	0.000301158	0.0181984	Actbeta	PREDICTED: inhibin beta chain [Bemisia tabaci]	Environmental Information Processing	Signal transduction	ko04350//TGF-beta signaling pathway	K22687	-	-	-
miR-107-y	12.1449	1.32373	-3.19766	0.00358132	Unigene0045529	0.3205	4.92387	3.9414	2.876e-18	3.77903e-15	--	PREDICTED: mucin-5AC [Bemisia tabaci]	-	-	-	-	-	-	-
miR-107-y	12.1449	1.32373	-3.19766	0.00358132	Unigene0047779	2.82043	6.02987	1.09621	5.84879e-05	0.00504831	--	hypothetical protein L798_00845 [Zootermopsis nevadensis]	-	-	-	-	-	-	-
miR-107-y	12.1449	1.32373	-3.19766	0.00358132	Unigene0048010	0.0193333	2.38197	6.94492	4.39877e-05	0.00404143	--	--	-	-	-	-	-	-	-
miR-107-y	12.1449	1.32373	-3.19766	0.00358132	Unigene0048331	0.686367	1.79593	1.38768	0.000126944	0.00932191	--	conserved Plasmodium protein, unknown function [Plasmodium vivax]	-	-	-	-	-	-	-
miR-107-y	12.1449	1.32373	-3.19766	0.00358132	Unigene0048884	0.159867	3.1238	4.28836	5.67072e-14	3.86972e-11	--	--	-	-	-	-	-	-	-
miR-107-y	12.1449	1.32373	-3.19766	0.00358132	Unigene0048910	4.5773	9.95963	1.1216	3.3284e-05	0.0032168	CG2614	Methyltransferase-like protein 13 [Zootermopsis nevadensis]	-	-	-	-	-	-	-
miR-107-y	12.1449	1.32373	-3.19766	0.00358132	Unigene0049515	3.5774	11.7483	1.71547	2.72112e-06	0.000394019	YPEL1	PREDICTED: protein yippee-like 2 [Bemisia tabaci]	-	-	-	-	-	-	-
miR-107-y	12.1449	1.32373	-3.19766	0.00358132	Unigene0049525	7.60823	33.7861	2.1508	1.08226e-15	1.03624e-12	h	Hairy protein [Periplaneta americana]	-	-	-	-	-	-	-
miR-107-y	12.1449	1.32373	-3.19766	0.00358132	Unigene0049561	3.12367	7.60997	1.28465	8.05426e-06	0.000994821	sgl	UDP-glucose 6-dehydrogenase [Zootermopsis nevadensis]	Metabolism	Global and overview maps;Carbohydrate metabolism	ko01100//Metabolic pathways;ko00040//Pentose and glucuronate interconversions ;ko00520//Amino sugar and nucleotide sugar metabolism ;ko00053//Ascorbate and aldarate metabolism	K00012	-	GO:0000166//nucleotide binding;GO:0016614//oxidoreductase activity, acting on CH-OH group of donors	GO:0044710//single-organism metabolic process
miR-107-y	12.1449	1.32373	-3.19766	0.00358132	Unigene0050437	13.0072	42.7001	1.71492	3.617e-11	1.5842e-08	--	P-selectin [Zootermopsis nevadensis]	-	-	-	-	-	-	-
miR-107-y	12.1449	1.32373	-3.19766	0.00358132	Unigene0050707	5.36	39.7869	2.89199	2.2581e-21	4.35796e-18	Gadd45a	Growth arrest and DNA-damage-inducible protein GADD45 gamma [Zootermopsis nevadensis]	Environmental Information Processing	Signal transduction	ko04010//MAPK signaling pathway ;ko04068//FoxO signaling pathway	K04402	-	-	-
miR-107-y	12.1449	1.32373	-3.19766	0.00358132	Unigene0050825	1.92777	4.17357	1.11435	0.000189688	0.012761	Mcm6	DNA replication licensing factor Mcm6 [Zootermopsis nevadensis]	Genetic Information Processing	Replication and repair	ko03030//DNA replication	K02542	GO:0043231//intracellular membrane-bounded organelle;GO:0043234//protein complex	GO:0003676//nucleic acid binding;GO:0004386//helicase activity;GO:0032550//purine ribonucleoside binding	GO:0006259//DNA metabolic process;GO:0032392//DNA geometric change
miR-107-y	12.1449	1.32373	-3.19766	0.00358132	Unigene0051718	10.9301	28.9282	1.40417	1.10014e-07	2.29534e-05	ITIH4	PREDICTED: inter-alpha-trypsin inhibitor heavy chain H4-like [Halyomorpha halys]	-	-	-	-	-	-	-
miR-107-y	12.1449	1.32373	-3.19766	0.00358132	Unigene0051736	4.77793	22.4584	2.2328	9.44148e-15	7.62199e-12	hes4-a	Transcription factor HES-4-A [Zootermopsis nevadensis]	-	-	-	-	-	-	-
miR-107-y	12.1449	1.32373	-3.19766	0.00358132	Unigene0052207	6.2589	20.5978	1.71851	7.44855e-11	3.02634e-08	AGPAT1	1-acyl-sn-glycerol-3-phosphate acyltransferase alpha [Zootermopsis nevadensis]	Metabolism	Lipid metabolism;Global and overview maps	ko01100//Metabolic pathways;ko00564//Glycerophospholipid metabolism ;ko00561//Glycerolipid metabolism	K13509	-	GO:0016740//transferase activity	GO:0006629//lipid metabolic process
miR-107-y	12.1449	1.32373	-3.19766	0.00358132	Unigene0052303	8.92197	21.5162	1.26999	0.000410955	0.0231565	MMEL1	Membrane metallo-endopeptidase-like 1 [Zootermopsis nevadensis]	-	-	-	-	-	GO:0070011//peptidase activity, acting on L-amino acid peptides	GO:0019538//protein metabolic process
miR-107-y	12.1449	1.32373	-3.19766	0.00358132	Unigene0053858	2.17043	6.27943	1.53265	1.86805e-06	0.000282761	CCND2	PREDICTED: G1/S-specific cyclin-D2 [Neodiprion lecontei]	Environmental Information Processing	Signal transduction	ko04310//Wnt signaling pathway ;ko04068//FoxO signaling pathway	K10151	-	-	-
miR-107-y	12.1449	1.32373	-3.19766	0.00358132	Unigene0055429	18.6865	62.3222	1.73775	3.16388e-11	1.40067e-08	NFIX	PREDICTED: nuclear factor 1 X-type isoform X4 [Bemisia tabaci]	-	-	-	-	-	-	-
miR-107-y	12.1449	1.32373	-3.19766	0.00358132	Unigene0055459	1.01217	9.84203	3.28151	4.42427e-05	0.00405991	KLKB1	seminal fluid protein CSSFP033 [Chilo suppressalis]	-	-	-	-	-	-	-
miR-107-y	12.1449	1.32373	-3.19766	0.00358132	Unigene0055978	17.6549	53.807	1.60772	2.01007e-10	7.52343e-08	--	PREDICTED: ankyrin repeat and SOCS box protein 14-like [Bemisia tabaci]	-	-	-	-	-	-	-
miR-107-y	12.1449	1.32373	-3.19766	0.00358132	Unigene0056609	4.4568	10.9774	1.30046	1.29473e-05	0.00146876	--	PREDICTED: sodium channel protein Nach-like [Cimex lectularius]	-	-	-	-	-	-	-
miR-107-y	12.1449	1.32373	-3.19766	0.00358132	Unigene0056652	17.4319	39.6782	1.18661	4.24778e-06	0.000577188	SERPINB6	Leukocyte elastase inhibitor C [Zootermopsis nevadensis]	-	-	-	-	-	-	-
miR-107-y	12.1449	1.32373	-3.19766	0.00358132	Unigene0056734	16.4333	34.8725	1.08547	8.34645e-06	0.00102448	PSMA1	Proteasome subunit alpha type-1 [Zootermopsis nevadensis]	Genetic Information Processing	Folding, sorting and degradation	ko03050//Proteasome	K02725	-	-	-
miR-107-y	12.1449	1.32373	-3.19766	0.00358132	Unigene0058520	7.2002	16.8883	1.22992	3.38918e-06	0.000476239	Nurf-38	inorganic pyrophosphatase, partial [Coptotermes formosanus]	Metabolism	Energy metabolism	ko00190//Oxidative phosphorylation	K11726	GO:0044424//intracellular part	GO:0016462//pyrophosphatase activity	GO:0006793//phosphorus metabolic process
miR-107-y	12.1449	1.32373	-3.19766	0.00358132	Unigene0059502	0.277067	2.91853	3.39694	4.80014e-05	0.00431506	--	PREDICTED: zinc finger BED domain-containing protein 5-like [Parasteatoda tepidariorum]	-	-	-	-	-	-	-
miR-107-y	12.1449	1.32373	-3.19766	0.00358132	Unigene0060481	0.658467	6.1772	3.22977	0.000780973	0.0376363	--	AAEL010623-PA [Aedes aegypti]	-	-	-	-	-	-	-
miR-107-y	12.1449	1.32373	-3.19766	0.00358132	Unigene0060492	2.60483	6.4716	1.31293	2.13466e-06	0.000319591	Nol4l	PREDICTED: nucleolar protein 4-like isoform X3 [Aethina tumida]	-	-	-	-	-	-	-
miR-107-y	12.1449	1.32373	-3.19766	0.00358132	Unigene0063640	0.859867	1.80147	1.06699	0.000619714	0.0316036	E2f7	Transcription factor E2F7 [Zootermopsis nevadensis]	-	-	-	-	-	-	-
miR-107-y	12.1449	1.32373	-3.19766	0.00358132	Unigene0065153	0.8471	2.35287	1.47382	1.02242e-05	0.00120385	--	Thyroid adenoma-associated protein-like protein [Zootermopsis nevadensis]	-	-	-	-	-	-	-
miR-107-y	12.1449	1.32373	-3.19766	0.00358132	Unigene0065387	26.3922	59.1841	1.1651	3.20548e-06	0.000455086	HSD17B13	Epidermal retinal dehydrogenase 2 [Zootermopsis nevadensis]	-	-	-	-	-	-	-
miR-107-y	12.1449	1.32373	-3.19766	0.00358132	Unigene0065410	11.3147	23.0624	1.02734	2.70927e-05	0.0027229	CdGAPr	PREDICTED: GTPase-activating protein CdGAPr isoform X1 [Cephus cinctus]	-	-	-	-	-	-	-
miR-107-y	12.1449	1.32373	-3.19766	0.00358132	Unigene0067793	4.89853	21.5688	2.13852	4.59066e-14	3.22168e-11	Suco	PREDICTED: SUN domain-containing ossification factor [Camponotus floridanus]	-	-	-	-	-	-	-
miR-107-y	12.1449	1.32373	-3.19766	0.00358132	Unigene0068590	66.6932	366.884	2.45971	5.13836e-20	8.2424e-17	--	endonuclease-reverse transcriptase [Blattella germanica]	-	-	-	-	-	-	-
miR-107-y	12.1449	1.32373	-3.19766	0.00358132	Unigene0070119	5.61073	15.4143	1.45801	4.33319e-06	0.000585573	col2a1	PREDICTED: fibril-forming collagen alpha chain-like [Neodiprion lecontei]	Environmental Information Processing	Signaling molecules and interaction	ko04512//ECM-receptor interaction	K19719	-	-	-
miR-107-y	12.1449	1.32373	-3.19766	0.00358132	Unigene0071775	3.6217	8.29333	1.19529	3.26064e-06	0.000461326	mlec	Malectin-B [Zootermopsis nevadensis]	-	-	-	-	-	-	-
miR-107-y	12.1449	1.32373	-3.19766	0.00358132	Unigene0072284	14.4483	42.4809	1.55591	9.53368e-08	2.01291e-05	AAEL008004	Elongation of very long chain fatty acids protein [Zootermopsis nevadensis]	-	-	-	-	GO:0016020//membrane	-	GO:0006631//fatty acid metabolic process
miR-107-y	12.1449	1.32373	-3.19766	0.00358132	Unigene0073093	2.9384	19.0661	2.6979	2.06618e-16	2.23863e-13	--	--	-	-	-	-	-	-	-
miR-107-y	12.1449	1.32373	-3.19766	0.00358132	Unigene0073516	0.24	18.5491	6.27217	1.52819e-06	0.000236831	--	PREDICTED: splicing factor, arginine/serine-rich 15-like [Bemisia tabaci]	-	-	-	-	-	-	-
miR-107-y	12.1449	1.32373	-3.19766	0.00358132	Unigene0076182	48.9193	104.611	1.09656	3.4155e-05	0.00328555	Tret1	Solute carrier family 2, facilitated glucose transporter member 8 [Zootermopsis nevadensis]	-	-	-	-	GO:0016020//membrane	GO:0022857//transmembrane transporter activity	GO:0044765//single-organism transport
miR-10955-y	5.1398	0.424733	-3.59708	0.00479253	Unigene0008360	3.29603	11.9306	1.85587	3.80386e-09	1.11072e-06	PCP36	PREDICTED: pupal cuticle protein 20 [Tribolium castaneum]	-	-	-	-	-	-	-
miR-10955-y	5.1398	0.424733	-3.59708	0.00479253	Unigene0027805	0.001	0.955167	9.89961	0.000934299	0.0425542	--	Sugar transporter ERD6-like 4 [Zootermopsis nevadensis]	-	-	-	-	GO:0031224//intrinsic component of membrane	GO:0022857//transmembrane transporter activity	GO:0044763//single-organism cellular process;GO:0051234//establishment of localization
miR-10955-y	5.1398	0.424733	-3.59708	0.00479253	Unigene0045098	0.1809	0.867267	2.26128	0.000250923	0.0158812	--	Palmitoyltransferase [Operophtera brumata]	-	-	-	-	-	-	-
miR-10955-y	5.1398	0.424733	-3.59708	0.00479253	Unigene0047043	2.1238	6.4837	1.61017	3.83433e-09	1.11697e-06	tx	Helix-loop-helix protein delilah [Zootermopsis nevadensis]	-	-	-	-	-	-	-
miR-10955-y	5.1398	0.424733	-3.59708	0.00479253	Unigene0050100	3.063	26.2877	3.10137	8.28191e-05	0.00666514	--	chemosensory protein [Blattella germanica]	-	-	-	-	-	-	-
miR-10955-y	5.1398	0.424733	-3.59708	0.00479253	Unigene0053514	12.8588	32.1893	1.32382	0.000344697	0.0202643	--	DNA topoisomerase 2-alpha [Orchesella cincta]	-	-	-	-	-	-	-
miR-10955-y	5.1398	0.424733	-3.59708	0.00479253	Unigene0072081	1.0436	3.0214	1.53365	0.000536789	0.0283947	--	hypothetical protein L798_02999 [Zootermopsis nevadensis]	-	-	-	-	-	-	-
miR-1175-x	0.3441	8.7513	4.6686	0.00238452	Unigene0002645	2.1593	0.479533	-2.17086	2.33032e-07	4.40106e-05	Jrk	PREDICTED: jerky protein-like [Halyomorpha halys]	-	-	-	-	-	-	-
miR-1175-x	0.3441	8.7513	4.6686	0.00238452	Unigene0002651	4.90573	0.3816	-3.68434	9.93172e-19	1.394e-15	--	endonuclease-reverse transcriptase [Blattella germanica]	-	-	-	-	-	-	-
miR-1175-x	0.3441	8.7513	4.6686	0.00238452	Unigene0005790	13.1031	5.30943	-1.30328	4.90309e-07	8.60235e-05	4CL	PREDICTED: probable 4-coumarate--CoA ligase 5 [Diachasma alloeum]	-	-	-	-	-	-	-
miR-1175-x	0.3441	8.7513	4.6686	0.00238452	Unigene0013870	12.6527	4.35147	-1.53988	4.89322e-07	8.59725e-05	--	--	-	-	-	-	-	-	-
miR-1175-x	0.3441	8.7513	4.6686	0.00238452	Unigene0015814	8.06393	3.99913	-1.0118	0.000122479	0.0090587	LCT	Lactase-phlorizin hydrolase [Zootermopsis nevadensis]	Metabolism	Carbohydrate metabolism;Global and overview maps	ko01100//Metabolic pathways;ko00052//Galactose metabolism	K01229	-	-	-
miR-1175-x	0.3441	8.7513	4.6686	0.00238452	Unigene0035290	21.4717	9.6722	-1.15052	2.67511e-05	0.00270188	TpnC47D	troponin C-like protein [Coptotermes formosanus]	-	-	-	-	-	-	-
miR-1175-x	0.3441	8.7513	4.6686	0.00238452	Unigene0050014	29.2112	12.9694	-1.17141	5.58608e-06	0.000730894	CYP9E2	Cytochrome P450 9e2 [Zootermopsis nevadensis]	-	-	-	-	-	GO:0005488//binding	-
miR-1175-x	0.3441	8.7513	4.6686	0.00238452	Unigene0053540	18.6235	7.4982	-1.31251	2.0365e-07	3.93028e-05	UNC13D	BAI1-associated protein 3 [Zootermopsis nevadensis]	-	-	-	-	-	-	-
miR-1175-x	0.3441	8.7513	4.6686	0.00238452	Unigene0054204	2.17323	0.329633	-2.72091	1.74935e-09	5.52613e-07	--	hypothetical protein L798_15358 [Zootermopsis nevadensis]	-	-	-	-	-	-	-
miR-1175-x	0.3441	8.7513	4.6686	0.00238452	Unigene0054907	10.1622	3.30483	-1.62057	8.98447e-09	2.42296e-06	PTPRK	Receptor-type tyrosine-protein phosphatase kappa, partial [Zootermopsis nevadensis]	-	-	-	-	-	GO:0004721//phosphoprotein phosphatase activity	GO:0006470//protein dephosphorylation
miR-1175-x	0.3441	8.7513	4.6686	0.00238452	Unigene0059716	42.1694	15.3399	-1.45891	8.37552e-08	1.80541e-05	--	Transforming growth factor beta-2 protein [Daphnia magna]	-	-	-	-	-	-	-
miR-1175-x	0.3441	8.7513	4.6686	0.00238452	Unigene0060922	19.14	3.6447	-2.39272	9.92936e-08	2.09287e-05	Ddc	Aromatic-L-amino-acid decarboxylase, partial [Zootermopsis nevadensis]	Metabolism	Amino acid metabolism;Global and overview maps	ko01100//Metabolic pathways;ko00380//Tryptophan metabolism ;ko00350//Tyrosine metabolism ;ko00360//Phenylalanine metabolism	K01593	-	-	-
miR-1175-x	0.3441	8.7513	4.6686	0.00238452	Unigene0065396	2.25623	0.8013	-1.4935	5.60611e-07	9.71163e-05	--	AGAP002718-PB [Anopheles gambiae str. PEST] [Anopheles gambiae]	-	-	-	-	-	-	-
miR-1175-x	0.3441	8.7513	4.6686	0.00238452	Unigene0069196	316.487	85.3538	-1.89062	5.4973e-14	3.77221e-11	--	similar to CG34038 [Papilio xuthus]	-	-	-	-	-	-	-
miR-1175-x	0.3441	8.7513	4.6686	0.00238452	Unigene0072146	4.6638	2.23957	-1.05829	6.37501e-05	0.00541175	Abcg1	PREDICTED: ATP-binding cassette sub-family G member 4 [Bemisia tabaci]	-	-	-	-	-	-	-
miR-1175-x	0.3441	8.7513	4.6686	0.00238452	Unigene0073425	8.64133	2.33293	-1.88911	1.14211e-07	2.36332e-05	--	hypothetical protein L798_08243 [Zootermopsis nevadensis]	-	-	-	-	-	-	-
miR-1175-x	0.3441	8.7513	4.6686	0.00238452	Unigene0076661	23.2904	10.1898	-1.1926	2.20358e-05	0.00230712	spns2	PREDICTED: protein spinster homolog 2 isoform X1 [Wasmannia auropunctata]	-	-	-	-	-	-	-
miR-1175-x	0.3441	8.7513	4.6686	0.00238452	Unigene0077298	2.13247	0.763333	-1.48214	0.000621199	0.0316663	--	hypothetical protein L798_15668 [Zootermopsis nevadensis]	-	-	-	-	-	-	-
miR-1175-y	63.0857	134.111	1.08804	0.0393478	Unigene0001669	18.6315	3.06277	-2.60484	1.60385e-11	7.6192e-09	--	Muscle M-line assembly protein unc-89 [Zootermopsis nevadensis]	-	-	-	-	-	-	-
miR-1175-y	63.0857	134.111	1.08804	0.0393478	Unigene0003480	11.056	5.15027	-1.10211	6.99546e-05	0.00583814	--	Protein Tob2 [Zootermopsis nevadensis]	Genetic Information Processing	Folding, sorting and degradation	ko03018//RNA degradation	K14443	-	-	-
miR-1175-y	63.0857	134.111	1.08804	0.0393478	Unigene0004370	11.5462	4.28227	-1.43097	3.91406e-07	7.08864e-05	SDR-1	enkurin [Coptotermes formosanus]	-	-	-	-	-	GO:0003824//catalytic activity	GO:0044710//single-organism metabolic process
miR-1175-y	63.0857	134.111	1.08804	0.0393478	Unigene0004579	9.1876	2.4447	-1.91003	2.51501e-11	1.13373e-08	SDR-1	enkurin [Coptotermes formosanus]	-	-	-	-	-	-	-
miR-1175-y	63.0857	134.111	1.08804	0.0393478	Unigene0008481	4.7343	1.92427	-1.29884	8.57056e-07	0.000141523	NLGN4X	AGAP003570-PA-like protein [Anopheles sinensis]	-	-	-	-	-	-	-
miR-1175-y	63.0857	134.111	1.08804	0.0393478	Unigene0011457	10.938	5.25733	-1.05695	3.11026e-05	0.00303208	TY3B-G	reverse ribonuclease integrase [Lasius niger]	-	-	-	-	-	-	-
miR-1175-y	63.0857	134.111	1.08804	0.0393478	Unigene0014069	8.43747	4.0271	-1.06707	9.5005e-05	0.00741754	--	cuticular protein SD [Laodelphax striatella]	-	-	-	-	-	-	-
miR-1175-y	63.0857	134.111	1.08804	0.0393478	Unigene0045863	1.9016	0.204633	-3.2161	8.2832e-05	0.00666514	--	daphnid bacterial-ribosomal-RNA-like, possible HGT, partial [Daphnia magna]	-	-	-	-	-	-	-
miR-1175-y	63.0857	134.111	1.08804	0.0393478	Unigene0053692	8.55067	3.36313	-1.34623	4.04923e-07	7.29068e-05	--	uncharacterized LOC100141786 [Tribolium castaneum]	-	-	-	-	-	-	-
miR-1175-y	63.0857	134.111	1.08804	0.0393478	Unigene0053922	13.7007	6.6175	-1.04989	6.14007e-05	0.00524838	REEP4	Receptor expression-enhancing protein 2 [Zootermopsis nevadensis]	-	-	-	-	-	-	-
miR-1175-y	63.0857	134.111	1.08804	0.0393478	Unigene0054091	108.62	30.979	-1.80993	2.4181e-12	1.30997e-09	--	Cuticle protein 6 [Zootermopsis nevadensis]	-	-	-	-	-	-	-
miR-1175-y	63.0857	134.111	1.08804	0.0393478	Unigene0054907	10.1622	3.30483	-1.62057	8.98447e-09	2.42296e-06	PTPRK	Receptor-type tyrosine-protein phosphatase kappa, partial [Zootermopsis nevadensis]	-	-	-	-	-	GO:0004721//phosphoprotein phosphatase activity	GO:0006470//protein dephosphorylation
miR-1175-y	63.0857	134.111	1.08804	0.0393478	Unigene0056907	1.466	0.570767	-1.36091	0.000116364	0.00870019	--	Protein msta, isoform A [Zootermopsis nevadensis]	-	-	-	-	-	-	-
miR-1175-y	63.0857	134.111	1.08804	0.0393478	Unigene0057283	12.1929	4.03763	-1.59446	4.61337e-10	1.60062e-07	Plb1	Phospholipase B1, membrane-associated [Zootermopsis nevadensis]	Metabolism	Lipid metabolism;Global and overview maps	ko01100//Metabolic pathways;ko00564//Glycerophospholipid metabolism ;ko00565//Ether lipid metabolism ;ko00590//Arachidonic acid metabolism ;ko00592//alpha-Linolenic acid metabolism ;ko00591//Linoleic acid metabolism	K14621	-	-	-
miR-1175-y	63.0857	134.111	1.08804	0.0393478	Unigene0069196	316.487	85.3538	-1.89062	5.4973e-14	3.77221e-11	--	similar to CG34038 [Papilio xuthus]	-	-	-	-	-	-	-
miR-1175-y	63.0857	134.111	1.08804	0.0393478	Unigene0069883	29.0182	12.6131	-1.20203	2.62989e-06	0.000384415	--	PREDICTED: serine/arginine repetitive matrix protein 2-like, partial [Halyomorpha halys]	-	-	-	-	-	-	-
miR-1175-y	63.0857	134.111	1.08804	0.0393478	Unigene0070819	1.15277	0.1865	-2.62785	8.74372e-08	1.86848e-05	fln	Flightin [Zootermopsis nevadensis]	-	-	-	-	-	-	-
miR-1175-y	63.0857	134.111	1.08804	0.0393478	Unigene0070821	92.1038	30.7313	-1.58355	3.83522e-10	1.34959e-07	fln	Flightin [Zootermopsis nevadensis]	-	-	-	-	-	-	-
miR-1175-y	63.0857	134.111	1.08804	0.0393478	Unigene0072582	43.1572	8.98283	-2.26436	2.02933e-16	2.21816e-13	--	Dehydrogenase/reductase SDR family member 11 [Zootermopsis nevadensis]	-	-	-	-	-	-	-
miR-1175-y	63.0857	134.111	1.08804	0.0393478	Unigene0073750	10.6482	3.54403	-1.58715	1.14116e-07	2.36332e-05	Cel	Esterase E4 [Zootermopsis nevadensis]	Metabolism	Global and overview maps;Xenobiotics biodegradation and metabolism	ko01100//Metabolic pathways;ko00983//Drug metabolism - other enzymes	K01044	-	-	-
miR-1175-y	63.0857	134.111	1.08804	0.0393478	Unigene0074348	16.1397	1.36437	-3.56431	4.64335e-26	1.73795e-22	--	PREDICTED: fibrillin-1-like [Limulus polyphemus]	-	-	-	-	-	-	-
miR-125-y	42.3734	123.658	1.54513	0.000189282	Unigene0001252	14.8552	3.96117	-1.90697	3.24531e-10	1.15517e-07	GAS2	PREDICTED: growth arrest-specific protein 2 isoform X1 [Harpegnathos saltator]	-	-	-	-	-	-	-
miR-125-y	42.3734	123.658	1.54513	0.000189282	Unigene0001376	4.10447	0.604433	-2.76354	4.13091e-05	0.00385079	--	hypothetical protein L798_15668 [Zootermopsis nevadensis]	-	-	-	-	-	-	-
miR-125-y	42.3734	123.658	1.54513	0.000189282	Unigene0008280	77.3719	23.2799	-1.73273	4.03822e-07	7.28147e-05	--	hypothetical protein L798_11021 [Zootermopsis nevadensis]	-	-	-	-	-	-	-
miR-125-y	42.3734	123.658	1.54513	0.000189282	Unigene0050765	7.59323	3.05197	-1.31498	3.85787e-05	0.00363744	ple	PREDICTED: tyrosine 3-monooxygenase [Bemisia tabaci]	Metabolism	Amino acid metabolism;Global and overview maps;Metabolism of cofactors and vitamins	ko01100//Metabolic pathways;ko00790//Folate biosynthesis ;ko00350//Tyrosine metabolism	K00501	-	-	-
miR-125-y	42.3734	123.658	1.54513	0.000189282	Unigene0050820	11.6435	0.877567	-3.72987	3.08095e-29	1.40942e-25	--	Protein takeout [Zootermopsis nevadensis]	-	-	-	-	-	-	-
miR-125-y	42.3734	123.658	1.54513	0.000189282	Unigene0053310	2.84303	0.515	-2.46479	6.59452e-14	4.35573e-11	CA2	Carbonic anhydrase 2 [Zootermopsis nevadensis]	Metabolism	Energy metabolism	ko00910//Nitrogen metabolism	K01672	-	-	-
miR-125-y	42.3734	123.658	1.54513	0.000189282	Unigene0055601	40.8845	6.42833	-2.66904	1.5372e-23	4.12754e-20	Trp53inp1	Tumor protein p53-inducible nuclear protein 1 [Zootermopsis nevadensis]	Cellular Processes	Transport and catabolism	ko04140//Autophagy - animal	K21247	-	-	-
miR-125-y	42.3734	123.658	1.54513	0.000189282	Unigene0060145	1.80827	0.9014	-1.00437	0.000728483	0.0356069	--	Transposable element Tc3 transposase [Anoplophora glabripennis]	-	-	-	-	-	-	-
miR-125-y	42.3734	123.658	1.54513	0.000189282	Unigene0065396	2.25623	0.8013	-1.4935	5.60611e-07	9.71163e-05	--	AGAP002718-PB [Anopheles gambiae str. PEST] [Anopheles gambiae]	-	-	-	-	-	-	-
miR-125-y	42.3734	123.658	1.54513	0.000189282	Unigene0071896	156.169	26.4973	-2.55919	8.42023e-24	2.36369e-20	AAEL002956	PREDICTED: probable citrate synthase 2, mitochondrial [Diaphorina citri]	Metabolism	Global and overview maps;Carbohydrate metabolism	ko01100//Metabolic pathways;ko01200//Carbon metabolism;ko01230//Biosynthesis of amino acids;ko00020//Citrate cycle (TCA cycle) ;ko00630//Glyoxylate and dicarboxylate metabolism ;ko01210//2-Oxocarboxylic acid metabolism	K01647	-	-	-
miR-125-y	42.3734	123.658	1.54513	0.000189282	Unigene0072582	43.1572	8.98283	-2.26436	2.02933e-16	2.21816e-13	--	Dehydrogenase/reductase SDR family member 11 [Zootermopsis nevadensis]	-	-	-	-	-	-	-
miR-125-y	42.3734	123.658	1.54513	0.000189282	Unigene0073580	10.2363	1.87237	-2.45075	6.32531e-16	6.51059e-13	wupA	Troponin I [Papilio machaon]	-	-	-	-	-	-	-
miR-125-y	42.3734	123.658	1.54513	0.000189282	Unigene0076661	23.2904	10.1898	-1.1926	2.20358e-05	0.00230712	spns2	PREDICTED: protein spinster homolog 2 isoform X1 [Wasmannia auropunctata]	-	-	-	-	-	-	-
miR-125-y	42.3734	123.658	1.54513	0.000189282	Unigene0077391	182.676	84.9512	-1.10458	1.00893e-05	0.00119138	unc-22	PREDICTED: twitchin isoform X18 [Cephus cinctus]	-	-	-	-	-	-	-
miR-125-y	42.3734	123.658	1.54513	0.000189282	Unigene0078913	13.6611	6.7448	-1.01823	0.000204206	0.0135024	--	troponin I [Coptotermes formosanus]	-	-	-	-	-	-	-
miR-125-y	42.3734	123.658	1.54513	0.000189282	Unigene0080464	863.216	424.091	-1.02535	6.53962e-05	0.00551736	Mlc2	EF-hand domain containing protein [Coptotermes formosanus]	-	-	-	-	-	-	-
miR-126-x	18.5519	3.47	-2.41856	0.00155255	Unigene0002500	8.97507	27.0564	1.59197	5.94896e-08	1.3433e-05	COL9A1	PREDICTED: collagen alpha-1(IX) chain-like isoform X1 [Aethina tumida]	Environmental Information Processing	Signaling molecules and interaction	ko04512//ECM-receptor interaction	K08131	-	-	-
miR-126-x	18.5519	3.47	-2.41856	0.00155255	Unigene0003266	4.68583	9.4515	1.01224	8.1783e-05	0.00660656	--	myotubularin-related protein 10-b [Lasius niger]	-	-	-	-	-	-	-
miR-126-x	18.5519	3.47	-2.41856	0.00155255	Unigene0003691	3.84043	9.05497	1.23744	1.01013e-06	0.000164166	GRIK2	PREDICTED: glutamate receptor ionotropic, kainate 2 isoform X2 [Tribolium castaneum]	-	-	-	-	GO:0031224//intrinsic component of membrane;GO:0097060//synaptic membrane	GO:0005231//excitatory extracellular ligand-gated ion channel activity	GO:0006811//ion transport;GO:0007215//glutamate receptor signaling pathway
miR-126-x	18.5519	3.47	-2.41856	0.00155255	Unigene0005154	17.4145	43.5875	1.32362	7.26537e-06	0.000911973	--	--	-	-	-	-	-	-	-
miR-126-x	18.5519	3.47	-2.41856	0.00155255	Unigene0005998	5.99127	12.4726	1.05783	4.59602e-05	0.00417717	Nelf-E	Negative elongation factor E [Zootermopsis nevadensis]	-	-	-	-	-	GO:0008135//translation factor activity, RNA binding	GO:0034645//cellular macromolecule biosynthetic process
miR-126-x	18.5519	3.47	-2.41856	0.00155255	Unigene0006787	0.853267	2.17113	1.34738	0.000824593	0.0390828	--	Retrotransposable element, partial [Anoplophora glabripennis]	-	-	-	-	-	-	-
miR-126-x	18.5519	3.47	-2.41856	0.00155255	Unigene0008823	0.1934	8.6854	5.48893	5.03089e-05	0.00447534	--	hypothetical protein L798_11378 [Zootermopsis nevadensis]	-	-	-	-	-	-	-
miR-126-x	18.5519	3.47	-2.41856	0.00155255	Unigene0009639	11.191	29.5584	1.40122	8.81905e-08	1.87808e-05	CDK5RAP3	PREDICTED: CDK5 regulatory subunit-associated protein 3 [Athalia rosae]	-	-	-	-	-	-	-
miR-126-x	18.5519	3.47	-2.41856	0.00155255	Unigene0010051	1.05373	66.8289	5.98689	6.28522e-06	0.000809509	--	AAEL017015-PA [Aedes aegypti]	-	-	-	-	-	-	-
miR-126-x	18.5519	3.47	-2.41856	0.00155255	Unigene0011460	4.35247	10.3797	1.25386	3.05522e-06	0.000438288	mex3b	RNA-binding protein MEX3B [Zootermopsis nevadensis]	-	-	-	-	-	-	-
miR-126-x	18.5519	3.47	-2.41856	0.00155255	Unigene0041122	0.438967	32.7162	6.21975	2.34833e-05	0.00243743	--	PREDICTED: protein SEY1-like [Fopius arisanus]	-	-	-	-	-	-	-
miR-126-x	18.5519	3.47	-2.41856	0.00155255	Unigene0043439	3.3603	8.70217	1.37278	1.19533e-06	0.00019075	ski	Ski oncogene [Zootermopsis nevadensis]	-	-	-	-	-	-	-
miR-126-x	18.5519	3.47	-2.41856	0.00155255	Unigene0046199	22.2273	64.0992	1.52798	1.63689e-08	4.30171e-06	--	protein phum phum308880 pediculus us corporis, partial [Nyssomyia neivai]	Environmental Information Processing	Signal transduction	ko04310//Wnt signaling pathway	K03096	-	-	-
miR-126-x	18.5519	3.47	-2.41856	0.00155255	Unigene0047597	0.219633	2.49363	3.50508	0.000834776	0.039384	--	ryanodine receptor-like protein [Phlebotomus papatasi]	-	-	-	-	-	-	-
miR-126-x	18.5519	3.47	-2.41856	0.00155255	Unigene0047779	2.82043	6.02987	1.09621	5.84879e-05	0.00504831	--	hypothetical protein L798_00845 [Zootermopsis nevadensis]	-	-	-	-	-	-	-
miR-126-x	18.5519	3.47	-2.41856	0.00155255	Unigene0048675	0.1957	6.02907	4.94522	0.000229759	0.0148813	--	PREDICTED: chondroitin proteoglycan 1-like [Agrilus planipennis]	-	-	-	-	-	-	-
miR-126-x	18.5519	3.47	-2.41856	0.00155255	Unigene0050233	0.0829	7.8928	6.57302	5.46085e-06	0.00071755	Sb	Serine proteinase stubble [Zootermopsis nevadensis]	-	-	-	-	-	-	-
miR-126-x	18.5519	3.47	-2.41856	0.00155255	Unigene0052207	6.2589	20.5978	1.71851	7.44855e-11	3.02634e-08	AGPAT1	1-acyl-sn-glycerol-3-phosphate acyltransferase alpha [Zootermopsis nevadensis]	Metabolism	Lipid metabolism;Global and overview maps	ko01100//Metabolic pathways;ko00564//Glycerophospholipid metabolism ;ko00561//Glycerolipid metabolism	K13509	-	GO:0016740//transferase activity	GO:0006629//lipid metabolic process
miR-126-x	18.5519	3.47	-2.41856	0.00155255	Unigene0052766	0.0711333	0.367367	2.36862	0.000656404	0.0329175	HYPK	Huntingtin-interacting protein K [Zootermopsis nevadensis]	-	-	-	-	-	-	-
miR-126-x	18.5519	3.47	-2.41856	0.00155255	Unigene0053345	0.973067	5.528	2.50615	3.83951e-11	1.66399e-08	--	hypothetical protein L798_09305 [Zootermopsis nevadensis]	-	-	-	-	-	-	-
miR-126-x	18.5519	3.47	-2.41856	0.00155255	Unigene0055707	1.45373	4.21943	1.53729	2.42535e-06	0.000357905	--	PREDICTED: sialin [Cerapachys biroi]	-	-	-	-	-	-	-
miR-126-x	18.5519	3.47	-2.41856	0.00155255	Unigene0057363	26.4465	81.4372	1.62261	1.01934e-10	4.02248e-08	--	PREDICTED: glycogenin-1 isoform X2 [Apis cerana]	Metabolism	Carbohydrate metabolism;Global and overview maps	ko01100//Metabolic pathways;ko00500//Starch and sucrose metabolism	K00750	-	-	-
miR-126-x	18.5519	3.47	-2.41856	0.00155255	Unigene0057853	12.0515	30.0889	1.32001	5.10367e-06	0.000674925	sbk1	Serine/threonine-protein kinase SBK1 [Zootermopsis nevadensis]	-	-	-	-	-	-	-
miR-126-x	18.5519	3.47	-2.41856	0.00155255	Unigene0058927	0.714333	2.33523	1.7089	2.92769e-05	0.0028906	--	Apolipophorin [Zootermopsis nevadensis]	-	-	-	-	-	-	-
miR-126-x	18.5519	3.47	-2.41856	0.00155255	Unigene0060331	3.341	8.79647	1.39664	1.3146e-06	0.000207373	--	Cyclin-dependent kinase inhibitor 1B [Lepeophtheirus salmonis]	-	-	-	-	-	-	-
miR-126-x	18.5519	3.47	-2.41856	0.00155255	Unigene0062469	51.8015	110.257	1.0898	4.46762e-05	0.00408452	Sesn	Sestrin-like protein [Zootermopsis nevadensis]	-	-	-	-	-	-	GO:1902882//regulation of response to oxidative stress
miR-126-x	18.5519	3.47	-2.41856	0.00155255	Unigene0062616	1.78627	6.22527	1.80119	0.000199865	0.0132865	--	Chondroitin proteoglycan-2 [Zootermopsis nevadensis]	-	-	-	-	-	GO:0097367//carbohydrate derivative binding	GO:0006022//aminoglycan metabolic process
miR-126-x	18.5519	3.47	-2.41856	0.00155255	Unigene0064477	10.8912	23.8707	1.13208	5.11377e-05	0.0045343	--	hypothetical protein L798_09464 [Zootermopsis nevadensis]	-	-	-	-	-	-	-
miR-126-x	18.5519	3.47	-2.41856	0.00155255	Unigene0067549	4.38553	11.249	1.35897	7.44544e-08	1.63054e-05	KEAP1	Kelch-like ECH-associated protein 1 [Zootermopsis nevadensis]	Genetic Information Processing	Folding, sorting and degradation	ko04120//Ubiquitin mediated proteolysis	K10456	-	-	-
miR-126-x	18.5519	3.47	-2.41856	0.00155255	Unigene0071540	0.284	1.01807	1.84187	1.41729e-05	0.00157851	--	period [Rhyparobia maderae]	Organismal Systems	Environmental adaptation	ko04711//Circadian rhythm - fly	K02633	-	-	GO:0010468//regulation of gene expression;GO:0050794//regulation of cellular process
miR-126-x	18.5519	3.47	-2.41856	0.00155255	Unigene0074012	324.781	1471.75	2.17999	1.69605e-14	1.29313e-11	--	Leucine-rich repeat-containing protein 20 [Zootermopsis nevadensis]	-	-	-	-	-	-	-
miR-126-x	18.5519	3.47	-2.41856	0.00155255	Unigene0074963	0.382833	0.896633	1.2278	0.000585952	0.0303327	--	Bystin [Zootermopsis nevadensis]	-	-	-	-	-	-	-
miR-126-x	18.5519	3.47	-2.41856	0.00155255	Unigene0076182	48.9193	104.611	1.09656	3.4155e-05	0.00328555	Tret1	Solute carrier family 2, facilitated glucose transporter member 8 [Zootermopsis nevadensis]	-	-	-	-	GO:0016020//membrane	GO:0022857//transmembrane transporter activity	GO:0044765//single-organism transport
miR-126-x	18.5519	3.47	-2.41856	0.00155255	Unigene0076411	1.70873	4.10457	1.2643	1.55565e-05	0.00170797	NHP2	H/ACA ribonucleoprotein complex subunit 2-like protein [Zootermopsis nevadensis]	Genetic Information Processing	Translation	ko03008//Ribosome biogenesis in eukaryotes	K11129	-	-	-
miR-126-y	14.0503	2.67327	-2.39393	0.00206524	Unigene0004749	6.82943	14.5877	1.09491	8.03722e-06	0.000993711	dan	Protein distal antenna [Zootermopsis nevadensis]	-	-	-	-	-	-	-
miR-126-y	14.0503	2.67327	-2.39393	0.00206524	Unigene0005052	1.61817	3.50507	1.11508	9.31012e-05	0.00731048	RCL1	PREDICTED: probable RNA 3'-terminal phosphate cyclase-like protein [Rhagoletis zephyria]	Genetic Information Processing	Translation	ko03008//Ribosome biogenesis in eukaryotes	K11108	-	GO:0003824//catalytic activity	-
miR-126-y	14.0503	2.67327	-2.39393	0.00206524	Unigene0048944	3.21467	8.95827	1.47855	2.29319e-08	5.68762e-06	brat	B-box type zinc finger protein ncl-1, partial [Zootermopsis nevadensis]	-	-	-	-	-	-	-
miR-126-y	14.0503	2.67327	-2.39393	0.00206524	Unigene0049397	0.444733	2.93903	2.72433	1.23264e-11	6.01778e-09	B1	carboxylesterase [Oxya chinensis]	Metabolism	Xenobiotics biodegradation and metabolism	ko00983//Drug metabolism - other enzymes	K03927	-	-	-
miR-126-y	14.0503	2.67327	-2.39393	0.00206524	Unigene0050159	0.911867	1.97053	1.11169	0.000383318	0.0220007	HLHmgamma	Enhancer of split mgamma protein [Zootermopsis nevadensis]	-	-	-	-	-	-	GO:0010467//gene expression;GO:0034645//cellular macromolecule biosynthetic process
miR-126-y	14.0503	2.67327	-2.39393	0.00206524	Unigene0052522	1.148	2.9417	1.35753	0.000990625	0.0442841	nrf-6	Nose resistant to fluoxetine protein 6 [Zootermopsis nevadensis]	-	-	-	-	-	-	-
miR-126-y	14.0503	2.67327	-2.39393	0.00206524	Unigene0058350	1.7937	27.4054	3.93345	3.20108e-10	1.14272e-07	SCD5	Acyl-CoA Delta(11) desaturase [Zootermopsis nevadensis]	Organismal Systems;Metabolism	Aging;Global and overview maps;Lipid metabolism	ko04212//Longevity regulating pathway - worm ;ko01212//Fatty acid metabolism;ko01040//Biosynthesis of unsaturated fatty acids	K00507	-	GO:0016491//oxidoreductase activity	GO:0006629//lipid metabolic process
miR-126-y	14.0503	2.67327	-2.39393	0.00206524	Unigene0062139	0.0251333	3.13707	6.96367	8.1513e-05	0.00658905	--	Beadex/dlmo protein [Daphnia magna]	-	-	-	-	-	-	-
miR-126-y	14.0503	2.67327	-2.39393	0.00206524	Unigene0068590	66.6932	366.884	2.45971	5.13836e-20	8.2424e-17	--	endonuclease-reverse transcriptase [Blattella germanica]	-	-	-	-	-	-	-
miR-126-y	14.0503	2.67327	-2.39393	0.00206524	Unigene0068832	5.03107	10.7148	1.09067	4.86702e-05	0.00436565	--	Alpha-tocopherol transfer protein-like [Zootermopsis nevadensis]	-	-	-	-	-	-	-
miR-126-y	14.0503	2.67327	-2.39393	0.00206524	Unigene0069646	7.40337	26.4141	1.83506	7.29486e-08	1.6061e-05	PebIII	chemosensory protein [Blattella germanica]	-	-	-	-	-	-	-
miR-126-y	14.0503	2.67327	-2.39393	0.00206524	Unigene0073631	16.1623	44.4846	1.46067	2.54259e-08	6.24349e-06	SLC16A14	Monocarboxylate transporter 5 [Zootermopsis nevadensis]	-	-	-	-	-	-	-
miR-126-y	14.0503	2.67327	-2.39393	0.00206524	Unigene0120798	0.8247	2.24323	1.44364	7.08251e-06	0.000894475	Shh	Sonic hedgehog protein, partial [Zootermopsis nevadensis]	Environmental Information Processing	Signal transduction	ko04341//Hedgehog signaling pathway - fly	K06224	-	-	-
miR-128-y	3.2046	0.417133	-2.94156	0.0176767	Unigene0001076	1.12863	2.56927	1.18678	0.000190851	0.0128184	--	hypothetical protein L798_10476 [Zootermopsis nevadensis]	-	-	-	-	-	-	-
miR-128-y	3.2046	0.417133	-2.94156	0.0176767	Unigene0001268	3.68483	8.4953	1.20507	9.86403e-06	0.00116813	--	histone-lysine n-methyltransferase setmar [Lasius niger]	-	-	-	-	-	-	-
miR-128-y	3.2046	0.417133	-2.94156	0.0176767	Unigene0001703	1.36947	3.38927	1.30736	2.64405e-05	0.00267908	--	Apolipoprotein D [Zootermopsis nevadensis]	-	-	-	-	-	-	-
miR-128-y	3.2046	0.417133	-2.94156	0.0176767	Unigene0002500	8.97507	27.0564	1.59197	5.94896e-08	1.3433e-05	COL9A1	PREDICTED: collagen alpha-1(IX) chain-like isoform X1 [Aethina tumida]	Environmental Information Processing	Signaling molecules and interaction	ko04512//ECM-receptor interaction	K08131	-	-	-
miR-128-y	3.2046	0.417133	-2.94156	0.0176767	Unigene0004647	1.9383	4.01037	1.04894	0.000118767	0.0088584	iHog	Interference hedgehog [Zootermopsis nevadensis]	Environmental Information Processing	Signal transduction	ko04341//Hedgehog signaling pathway - fly	K20245	-	-	-
miR-128-y	3.2046	0.417133	-2.94156	0.0176767	Unigene0004792	56.0035	191.945	1.77711	1.27667e-12	7.24518e-10	FAM184A	Protein FAM184A, partial [Exaiptasia pallida]	-	-	-	-	-	-	-
miR-128-y	3.2046	0.417133	-2.94156	0.0176767	Unigene0006523	12.0191	51.1425	2.08919	2.14646e-07	4.10402e-05	Tll2	PREDICTED: tolloid-like protein 1, partial [Cimex lectularius]	-	-	-	-	-	-	-
miR-128-y	3.2046	0.417133	-2.94156	0.0176767	Unigene0006524	6.25787	32.7384	2.38724	2.34088e-06	0.000347517	--	--	-	-	-	-	-	-	-
miR-128-y	3.2046	0.417133	-2.94156	0.0176767	Unigene0007761	2.40317	11.2756	2.2302	1.62226e-09	5.16425e-07	SUGTL3	Solute carrier family 2, facilitated glucose transporter member 8 [Zootermopsis nevadensis]	-	-	-	-	-	-	-
miR-128-y	3.2046	0.417133	-2.94156	0.0176767	Unigene0008365	4.03787	10.0844	1.32046	2.11896e-07	4.07398e-05	TFAP2B	PREDICTED: transcription factor AP-2-epsilon isoform X2 [Megachile rotundata]	-	-	-	-	GO:0043231//intracellular membrane-bounded organelle	-	GO:0010468//regulation of gene expression
miR-128-y	3.2046	0.417133	-2.94156	0.0176767	Unigene0008504	0.2728	5.40907	4.30946	2.21303e-08	5.51094e-06	--	Stress protein DDR48 [Zootermopsis nevadensis]	-	-	-	-	-	-	-
miR-128-y	3.2046	0.417133	-2.94156	0.0176767	Unigene0008581	0.682467	2.96967	2.12147	7.44051e-07	0.000124866	--	PREDICTED: calcium-binding protein P [Strongylocentrotus purpuratus]	-	-	-	-	-	-	-
miR-128-y	3.2046	0.417133	-2.94156	0.0176767	Unigene0008794	17.8669	45.042	1.33398	1.5934e-06	0.000246011	--	PREDICTED: paternally-expressed gene 3 protein-like [Hyalella azteca]	-	-	-	-	-	-	-
miR-128-y	3.2046	0.417133	-2.94156	0.0176767	Unigene0009541	0.584233	5.75893	3.30119	0.000137405	0.00991336	--	PREDICTED: location of vulva defective 1 isoform X1 [Cimex lectularius]	-	-	-	-	-	-	-
miR-128-y	3.2046	0.417133	-2.94156	0.0176767	Unigene0009639	11.191	29.5584	1.40122	8.81905e-08	1.87808e-05	CDK5RAP3	PREDICTED: CDK5 regulatory subunit-associated protein 3 [Athalia rosae]	-	-	-	-	-	-	-
miR-128-y	3.2046	0.417133	-2.94156	0.0176767	Unigene0010072	12.7435	26.7263	1.06849	3.45115e-05	0.00331726	ZFAND6	PREDICTED: mucin-3A isoform X2 [Acyrthosiphon pisum]	-	-	-	-	-	-	-
miR-128-y	3.2046	0.417133	-2.94156	0.0176767	Unigene0010941	2.24127	8.09233	1.85224	6.25871e-05	0.00532033	PXDN	PREDICTED: lactoperoxidase [Athalia rosae]	-	-	-	-	-	-	-
miR-128-y	3.2046	0.417133	-2.94156	0.0176767	Unigene0011319	0.1757	3.51097	4.32068	1.20552e-05	0.0013877	AAEL008004	Elongation of very long chain fatty acids protein 7 [Zootermopsis nevadensis]	-	-	-	-	-	-	-
miR-128-y	3.2046	0.417133	-2.94156	0.0176767	Unigene0012084	28.6023	80.772	1.49772	6.25142e-09	1.75089e-06	slc36a4	PREDICTED: proton-coupled amino acid transporter 1-like isoform X3 [Halyomorpha halys]	-	-	-	-	-	-	-
miR-128-y	3.2046	0.417133	-2.94156	0.0176767	Unigene0012644	0.116767	1.30813	3.48581	4.14193e-08	9.75033e-06	--	--	-	-	-	-	-	-	-
miR-128-y	3.2046	0.417133	-2.94156	0.0176767	Unigene0014629	0.211367	0.7032	1.73419	0.00112977	0.0489453	AURKB	Serine/threonine-protein kinase 12 [Zootermopsis nevadensis]	-	-	-	-	-	GO:0004672//protein kinase activity	-
miR-128-y	3.2046	0.417133	-2.94156	0.0176767	Unigene0040109	0.8119	1.666	1.03701	0.000993429	0.0443773	--	Rho GTPase-activating protein 11A [Zootermopsis nevadensis]	-	-	-	-	-	-	-
miR-128-y	3.2046	0.417133	-2.94156	0.0176767	Unigene0044789	0.495133	1.64337	1.73077	0.000226697	0.0147216	--	Mite allergen Lep d 7 [Zootermopsis nevadensis]	-	-	-	-	-	-	-
miR-128-y	3.2046	0.417133	-2.94156	0.0176767	Unigene0045063	6.5793	13.8842	1.07743	8.14981e-05	0.00658905	--	Growth factor receptor-bound protein 2 [Zootermopsis nevadensis]	-	-	-	-	-	-	-
miR-128-y	3.2046	0.417133	-2.94156	0.0176767	Unigene0046265	1.86063	4.96443	1.41584	3.16065e-07	5.818e-05	--	PREDICTED: zinc finger protein 253-like, partial [Octopus bimaculoides]	-	-	-	-	-	-	-
miR-128-y	3.2046	0.417133	-2.94156	0.0176767	Unigene0047043	2.1238	6.4837	1.61017	3.83433e-09	1.11697e-06	tx	Helix-loop-helix protein delilah [Zootermopsis nevadensis]	-	-	-	-	-	-	-
miR-128-y	3.2046	0.417133	-2.94156	0.0176767	Unigene0048608	5.60423	13.3221	1.24923	2.33006e-06	0.000346327	CG11837	PREDICTED: probable dimethyladenosine transferase [Cephus cinctus]	-	-	-	-	-	GO:0008170//N-methyltransferase activity;GO:0008173//RNA methyltransferase activity	GO:0000154//rRNA modification
miR-128-y	3.2046	0.417133	-2.94156	0.0176767	Unigene0048928	10.3317	26.59	1.3638	1.34202e-07	2.69967e-05	Lrrn4	Insulin-like growth factor-binding protein complex acid labile chain [Zootermopsis nevadensis]	-	-	-	-	-	-	-
miR-128-y	3.2046	0.417133	-2.94156	0.0176767	Unigene0049498	6.05953	15.998	1.40062	1.42868e-07	2.85539e-05	CG9987	PREDICTED: tRNA-splicing ligase RtcB homolog [Tribolium castaneum]	-	-	-	-	GO:0043234//protein complex	GO:0008452//RNA ligase activity;GO:0032550//purine ribonucleoside binding;GO:0043169//cation binding	GO:0000394//RNA splicing, via endonucleolytic cleavage and ligation;GO:0006399//tRNA metabolic process
miR-128-y	3.2046	0.417133	-2.94156	0.0176767	Unigene0049674	0.286467	4.77213	4.0582	3.0549e-05	0.00299039	LCC5	PREDICTED: laccase-5-like [Cephus cinctus]	-	-	-	-	-	-	-
miR-128-y	3.2046	0.417133	-2.94156	0.0176767	Unigene0050266	18.2496	38.8362	1.08954	9.61776e-05	0.00748543	--	PREDICTED: probable chitinase 3 [Bemisia tabaci]	-	-	-	-	-	-	-
miR-128-y	3.2046	0.417133	-2.94156	0.0176767	Unigene0050377	0.2181	13.5864	5.96103	6.72363e-07	0.00011439	--	PREDICTED: serine-rich adhesin for platelets-like [Habropoda laboriosa]	-	-	-	-	-	-	-
miR-128-y	3.2046	0.417133	-2.94156	0.0176767	Unigene0051583	4.65023	10.2546	1.14089	8.57601e-06	0.00104464	mybbp1a	DNA polymerase V [Zootermopsis nevadensis]	-	-	-	-	-	-	-
miR-128-y	3.2046	0.417133	-2.94156	0.0176767	Unigene0051732	1.41313	5.40687	1.9359	0.00115745	0.0498576	--	hypothetical protein L798_00817 [Zootermopsis nevadensis]	-	-	-	-	-	-	-
miR-128-y	3.2046	0.417133	-2.94156	0.0176767	Unigene0051940	8.04857	17.3779	1.11045	3.13676e-05	0.00305068	nifk	MKI67 FHA domain-interacting nucleolar phosphoprotein-like [Zootermopsis nevadensis]	-	-	-	-	-	-	-
miR-128-y	3.2046	0.417133	-2.94156	0.0176767	Unigene0052336	9.20593	21.9978	1.25672	1.07701e-05	0.00125856	LCT	Lactase-phlorizin hydrolase [Zootermopsis nevadensis]	Metabolism	Carbohydrate metabolism;Global and overview maps	ko01100//Metabolic pathways;ko00052//Galactose metabolism	K01229	-	-	-
miR-128-y	3.2046	0.417133	-2.94156	0.0176767	Unigene0052415	3.61913	11.818	1.70727	0.000406798	0.0230802	Gnpda1	PREDICTED: glucosamine-6-phosphate isomerase isoform X2 [Cephus cinctus]	Metabolism	Carbohydrate metabolism;Global and overview maps	ko01100//Metabolic pathways;ko00520//Amino sugar and nucleotide sugar metabolism	K02564	GO:0044424//intracellular part	GO:0003824//catalytic activity	GO:0044238//primary metabolic process;GO:1901071//glucosamine-containing compound metabolic process
miR-128-y	3.2046	0.417133	-2.94156	0.0176767	Unigene0053339	0.001	1.52437	10.574	0.00030081	0.0181895	--	cyclin-dependent serine threonine-protein kinase [Lasius niger]	-	-	-	-	-	-	-
miR-128-y	3.2046	0.417133	-2.94156	0.0176767	Unigene0053340	0.0134333	2.3408	7.44504	0.000252992	0.0159511	--	cyclin-dependent serine threonine-protein kinase [Lasius niger]	-	-	-	-	-	-	-
miR-128-y	3.2046	0.417133	-2.94156	0.0176767	Unigene0054408	6.33227	14.6165	1.2068	5.54616e-06	0.000727212	ck	Myosin-VIIa [Zootermopsis nevadensis]	-	-	-	-	-	-	-
miR-128-y	3.2046	0.417133	-2.94156	0.0176767	Unigene0055459	1.01217	9.84203	3.28151	4.42427e-05	0.00405991	KLKB1	seminal fluid protein CSSFP033 [Chilo suppressalis]	-	-	-	-	-	-	-
miR-128-y	3.2046	0.417133	-2.94156	0.0176767	Unigene0055492	4.47857	9.64333	1.10649	1.36947e-05	0.00153634	MDN1	Midasin [Zootermopsis nevadensis]	Genetic Information Processing	Translation	ko03008//Ribosome biogenesis in eukaryotes	K14572	-	-	-
miR-128-y	3.2046	0.417133	-2.94156	0.0176767	Unigene0055874	5.66167	11.3793	1.00711	0.000139273	0.0100098	--	LAS1-like protein [Zootermopsis nevadensis]	-	-	-	-	-	-	-
miR-128-y	3.2046	0.417133	-2.94156	0.0176767	Unigene0057029	3.43937	27.5807	3.00344	5.972e-19	8.67802e-16	HPD	4-hydroxyphenylpyruvate dioxygenase [Zootermopsis nevadensis]	Metabolism	Metabolism of cofactors and vitamins;Global and overview maps;Amino acid metabolism	ko01100//Metabolic pathways;ko00350//Tyrosine metabolism ;ko00360//Phenylalanine metabolism ;ko00130//Ubiquinone and other terpenoid-quinone biosynthesis	K00457	-	-	-
miR-128-y	3.2046	0.417133	-2.94156	0.0176767	Unigene0057775	6.43987	14.5438	1.1753	5.83967e-06	0.00076246	--	PREDICTED: storkhead-box protein 2 isoform X2 [Megachile rotundata]	-	-	-	-	-	-	-
miR-128-y	3.2046	0.417133	-2.94156	0.0176767	Unigene0058447	0.5795	1.7115	1.56238	4.80483e-06	0.000641588	--	hypothetical protein g.55293, partial [Homalodisca liturata]	-	-	-	-	-	-	-
miR-128-y	3.2046	0.417133	-2.94156	0.0176767	Unigene0059154	13.8135	38.09	1.46334	2.50893e-09	7.65161e-07	Creg1	Protein CREG1 [Zootermopsis nevadensis]	-	-	-	-	-	-	-
miR-128-y	3.2046	0.417133	-2.94156	0.0176767	Unigene0059721	3.4873	23.7964	2.77056	1.06481e-14	8.43076e-12	--	AGAP002550-PA [Anopheles gambiae str. PEST] [Anopheles gambiae]	-	-	-	-	-	-	-
miR-128-y	3.2046	0.417133	-2.94156	0.0176767	Unigene0059837	43.144	962.985	4.48028	1.2634e-13	8.0854e-11	HexA	hexamerin II [Reticulitermes flavipes]	-	-	-	-	-	-	-
miR-128-y	3.2046	0.417133	-2.94156	0.0176767	Unigene0060331	3.341	8.79647	1.39664	1.3146e-06	0.000207373	--	Cyclin-dependent kinase inhibitor 1B [Lepeophtheirus salmonis]	-	-	-	-	-	-	-
miR-128-y	3.2046	0.417133	-2.94156	0.0176767	Unigene0061358	2.30363	6.23277	1.43596	4.58738e-05	0.00417478	--	PREDICTED: protein NDNF [Anoplophora glabripennis]	-	-	-	-	-	-	-
miR-128-y	3.2046	0.417133	-2.94156	0.0176767	Unigene0062015	3.93237	8.3073	1.07898	2.52182e-05	0.00257636	Rsl1d1	Ribosomal L1 domain-containing protein 1 [Zootermopsis nevadensis]	-	-	-	-	-	-	-
miR-128-y	3.2046	0.417133	-2.94156	0.0176767	Unigene0062469	51.8015	110.257	1.0898	4.46762e-05	0.00408452	Sesn	Sestrin-like protein [Zootermopsis nevadensis]	-	-	-	-	-	-	GO:1902882//regulation of response to oxidative stress
miR-128-y	3.2046	0.417133	-2.94156	0.0176767	Unigene0062877	9.78077	24.7357	1.33858	2.43455e-05	0.00251214	--	seminal fluid protein [Nilaparvata lugens]	-	-	-	-	-	-	-
miR-128-y	3.2046	0.417133	-2.94156	0.0176767	Unigene0064382	13.9801	40.2775	1.5266	2.32694e-09	7.1318e-07	tubb1	beta-tubulin 4 [Nilaparvata lugens]	Cellular Processes	Transport and catabolism	ko04145//Phagosome	K07375	-	-	-
miR-128-y	3.2046	0.417133	-2.94156	0.0176767	Unigene0065154	5.2931	12.4275	1.23135	1.64684e-06	0.000251744	Tbl3	Transducin beta-like protein 3 [Zootermopsis nevadensis]	Genetic Information Processing	Translation	ko03008//Ribosome biogenesis in eukaryotes	K14555	-	-	-
miR-128-y	3.2046	0.417133	-2.94156	0.0176767	Unigene0065410	11.3147	23.0624	1.02734	2.70927e-05	0.0027229	CdGAPr	PREDICTED: GTPase-activating protein CdGAPr isoform X1 [Cephus cinctus]	-	-	-	-	-	-	-
miR-128-y	3.2046	0.417133	-2.94156	0.0176767	Unigene0067549	4.38553	11.249	1.35897	7.44544e-08	1.63054e-05	KEAP1	Kelch-like ECH-associated protein 1 [Zootermopsis nevadensis]	Genetic Information Processing	Folding, sorting and degradation	ko04120//Ubiquitin mediated proteolysis	K10456	-	-	-
miR-128-y	3.2046	0.417133	-2.94156	0.0176767	Unigene0069646	7.40337	26.4141	1.83506	7.29486e-08	1.6061e-05	PebIII	chemosensory protein [Blattella germanica]	-	-	-	-	-	-	-
miR-128-y	3.2046	0.417133	-2.94156	0.0176767	Unigene0070492	5.088	10.698	1.07217	4.96891e-05	0.00444413	ASH1L	PREDICTED: histone-lysine N-methyltransferase ash1 isoform X2 [Cimex lectularius]	Metabolism	Amino acid metabolism	ko00310//Lysine degradation	K06101	-	GO:0005488//binding;GO:0016740//transferase activity	-
miR-128-y	3.2046	0.417133	-2.94156	0.0176767	Unigene0070982	4.05897	10.3508	1.35056	3.45759e-07	6.31753e-05	RECK	Reversion-inducing cysteine-rich protein with Kazal motifs, partial [Zootermopsis nevadensis]	-	-	-	-	-	-	-
miR-128-y	3.2046	0.417133	-2.94156	0.0176767	Unigene0071775	3.6217	8.29333	1.19529	3.26064e-06	0.000461326	mlec	Malectin-B [Zootermopsis nevadensis]	-	-	-	-	-	-	-
miR-128-y	3.2046	0.417133	-2.94156	0.0176767	Unigene0072595	4.10717	10.4111	1.34191	0.000149475	0.0106167	IL16	Pro-interleukin-16 [Zootermopsis nevadensis]	-	-	-	-	-	-	-
miR-128-y	3.2046	0.417133	-2.94156	0.0176767	Unigene0072690	26.3386	74.9158	1.50809	9.87941e-10	3.24536e-07	Tret1	Sugar transporter ERD6-like 4 [Zootermopsis nevadensis]	-	-	-	-	-	-	-
miR-128-y	3.2046	0.417133	-2.94156	0.0176767	Unigene0073307	217.202	500.149	1.20332	8.35244e-06	0.00102448	l(2)efl	heat shock protein-like protein [Coptotermes formosanus]	Genetic Information Processing;Organismal Systems	Aging;Folding, sorting and degradation	ko04141//Protein processing in endoplasmic reticulum ;ko04213//Longevity regulating pathway - multiple species	K09542	-	-	-
miR-128-y	3.2046	0.417133	-2.94156	0.0176767	Unigene0073631	16.1623	44.4846	1.46067	2.54259e-08	6.24349e-06	SLC16A14	Monocarboxylate transporter 5 [Zootermopsis nevadensis]	-	-	-	-	-	-	-
miR-128-y	3.2046	0.417133	-2.94156	0.0176767	Unigene0073643	3.04197	7.15737	1.23442	8.7329e-06	0.00106251	ASNS	Asparagine synthetase [glutamine-hydrolyzing] [Zootermopsis nevadensis]	Metabolism	Amino acid metabolism;Global and overview maps	ko01100//Metabolic pathways;ko01230//Biosynthesis of amino acids;ko00250//Alanine, aspartate and glutamate metabolism	K01953	-	GO:0016884//carbon-nitrogen ligase activity, with glutamine as amido-N-donor;GO:0032550//purine ribonucleoside binding	GO:0006529//asparagine biosynthetic process
miR-128-y	3.2046	0.417133	-2.94156	0.0176767	Unigene0074012	324.781	1471.75	2.17999	1.69605e-14	1.29313e-11	--	Leucine-rich repeat-containing protein 20 [Zootermopsis nevadensis]	-	-	-	-	-	-	-
miR-128-y	3.2046	0.417133	-2.94156	0.0176767	Unigene0074261	357.29	851.187	1.25238	2.98134e-05	0.00292952	to	Protein takeout [Zootermopsis nevadensis]	-	-	-	-	-	-	-
miR-128-y	3.2046	0.417133	-2.94156	0.0176767	Unigene0074499	13.5278	27.3773	1.01705	6.14896e-05	0.00525221	IYD	Iodotyrosine dehalogenase 1, partial [Zootermopsis nevadensis]	-	-	-	-	-	-	-
miR-128-y	3.2046	0.417133	-2.94156	0.0176767	Unigene0078427	1.59387	4.2131	1.40235	9.09668e-07	0.000149412	RWDD2A	RWD domain-containing protein 2A [Zootermopsis nevadensis]	-	-	-	-	-	-	-
miR-128-y	3.2046	0.417133	-2.94156	0.0176767	Unigene0078998	0.8486	3.49557	2.04237	2.0614e-08	5.21751e-06	--	PREDICTED: dopamine N-acetyltransferase isoform X1 [Athalia rosae]	-	-	-	-	-	-	-
miR-128-y	3.2046	0.417133	-2.94156	0.0176767	Unigene0079894	5.48247	20.0211	1.86863	1.55127e-09	4.9634e-07	CYP6K1	Cytochrome P450 6k1, partial [Zootermopsis nevadensis]	-	-	-	-	-	GO:0005488//binding	-
miR-1307-x	1.6856	0.1699	-3.3105	0.0178853	Unigene0008581	0.682467	2.96967	2.12147	7.44051e-07	0.000124866	--	PREDICTED: calcium-binding protein P [Strongylocentrotus purpuratus]	-	-	-	-	-	-	-
miR-1307-x	1.6856	0.1699	-3.3105	0.0178853	Unigene0049397	0.444733	2.93903	2.72433	1.23264e-11	6.01778e-09	B1	carboxylesterase [Oxya chinensis]	Metabolism	Xenobiotics biodegradation and metabolism	ko00983//Drug metabolism - other enzymes	K03927	-	-	-
miR-1307-x	1.6856	0.1699	-3.3105	0.0178853	Unigene0049612	6.97003	39.4536	2.50092	8.99204e-18	1.12187e-14	--	Transcriptional regulator ICP4 domain-containing protein [Daphnia magna]	-	-	-	-	-	-	-
miR-1307-x	1.6856	0.1699	-3.3105	0.0178853	Unigene0050175	3.78403	8.14507	1.106	0.000197017	0.0131514	rasl11b	Ras-like protein family member 11B [Zootermopsis nevadensis]	-	-	-	-	-	-	-
miR-1307-x	1.6856	0.1699	-3.3105	0.0178853	Unigene0068832	5.03107	10.7148	1.09067	4.86702e-05	0.00436565	--	Alpha-tocopherol transfer protein-like [Zootermopsis nevadensis]	-	-	-	-	-	-	-
miR-1307-y	1.17107	0.01	-6.87168	0.00299375	Unigene0007761	2.40317	11.2756	2.2302	1.62226e-09	5.16425e-07	SUGTL3	Solute carrier family 2, facilitated glucose transporter member 8 [Zootermopsis nevadensis]	-	-	-	-	-	-	-
miR-1307-y	1.17107	0.01	-6.87168	0.00299375	Unigene0045529	0.3205	4.92387	3.9414	2.876e-18	3.77903e-15	--	PREDICTED: mucin-5AC [Bemisia tabaci]	-	-	-	-	-	-	-
miR-1357-x	14.5085	4.0337	-1.84673	0.0204594	Unigene0001123	5.67737	12.3958	1.12656	1.29497e-05	0.00146876	--	endonuclease-reverse transcriptase [Blattella germanica]	-	-	-	-	-	-	-
miR-1357-x	14.5085	4.0337	-1.84673	0.0204594	Unigene0001173	0.8575	4.3125	2.33032	3.92926e-10	1.37876e-07	--	soldier-caste specific protein [Coptotermes formosanus]	-	-	-	-	-	-	-
miR-1357-x	14.5085	4.0337	-1.84673	0.0204594	Unigene0001636	2.5542	6.38673	1.32221	1.60163e-07	3.18048e-05	hgh1	Brain protein 16 [Zootermopsis nevadensis]	-	-	-	-	-	-	-
miR-1357-x	14.5085	4.0337	-1.84673	0.0204594	Unigene0001848	2.1059	4.2861	1.02523	9.82357e-05	0.00761836	osgep	PREDICTED: probable tRNA N6-adenosine threonylcarbamoyltransferase [Anoplophora glabripennis]	-	-	-	-	GO:0044424//intracellular part	GO:0016746//transferase activity, transferring acyl groups;GO:0043169//cation binding	GO:0006400//tRNA modification
miR-1357-x	14.5085	4.0337	-1.84673	0.0204594	Unigene0002758	2.28233	8.3268	1.86725	1.87977e-09	5.89288e-07	--	Protein CREG1 [Zootermopsis nevadensis]	-	-	-	-	-	-	-
miR-1357-x	14.5085	4.0337	-1.84673	0.0204594	Unigene0004749	6.82943	14.5877	1.09491	8.03722e-06	0.000993711	dan	Protein distal antenna [Zootermopsis nevadensis]	-	-	-	-	-	-	-
miR-1357-x	14.5085	4.0337	-1.84673	0.0204594	Unigene0013143	2.21657	6.58213	1.57023	2.42356e-07	4.54933e-05	--	Transposase, partial [Anoplophora glabripennis]	-	-	-	-	-	-	-
miR-1357-x	14.5085	4.0337	-1.84673	0.0204594	Unigene0015824	1.5256	3.11297	1.02891	0.000572294	0.029788	--	Leucine-rich repeat-containing protein [Zootermopsis nevadensis]	-	-	-	-	-	-	-
miR-1357-x	14.5085	4.0337	-1.84673	0.0204594	Unigene0016188	7.0632	22.7924	1.69016	1.39506e-10	5.3347e-08	Ltv1	LTV1-like protein [Zootermopsis nevadensis]	-	-	-	-	-	-	-
miR-1357-x	14.5085	4.0337	-1.84673	0.0204594	Unigene0045098	0.1809	0.867267	2.26128	0.000250923	0.0158812	--	Palmitoyltransferase [Operophtera brumata]	-	-	-	-	-	-	-
miR-1357-x	14.5085	4.0337	-1.84673	0.0204594	Unigene0050377	0.2181	13.5864	5.96103	6.72363e-07	0.00011439	--	PREDICTED: serine-rich adhesin for platelets-like [Habropoda laboriosa]	-	-	-	-	-	-	-
miR-1357-x	14.5085	4.0337	-1.84673	0.0204594	Unigene0050437	13.0072	42.7001	1.71492	3.617e-11	1.5842e-08	--	P-selectin [Zootermopsis nevadensis]	-	-	-	-	-	-	-
miR-1357-x	14.5085	4.0337	-1.84673	0.0204594	Unigene0053817	7.66773	15.7791	1.04115	6.88206e-05	0.00575998	SPON1	Spondin-1 [Zootermopsis nevadensis]	-	-	-	-	-	-	-
miR-1357-x	14.5085	4.0337	-1.84673	0.0204594	Unigene0054408	6.33227	14.6165	1.2068	5.54616e-06	0.000727212	ck	Myosin-VIIa [Zootermopsis nevadensis]	-	-	-	-	-	-	-
miR-1357-x	14.5085	4.0337	-1.84673	0.0204594	Unigene0056884	0.1328	37.5151	8.14207	9.82512e-06	0.00116463	--	PREDICTED: keratin, type II cytoskeletal 1-like [Anoplophora glabripennis]	-	-	-	-	-	-	-
miR-1357-x	14.5085	4.0337	-1.84673	0.0204594	Unigene0057020	42.3286	89.9525	1.08753	1.28813e-05	0.00146639	--	PREDICTED: ras guanine nucleotide exchange factor P-like [Diaphorina citri]	-	-	-	-	-	-	-
miR-1357-x	14.5085	4.0337	-1.84673	0.0204594	Unigene0057853	12.0515	30.0889	1.32001	5.10367e-06	0.000674925	sbk1	Serine/threonine-protein kinase SBK1 [Zootermopsis nevadensis]	-	-	-	-	-	-	-
miR-1357-x	14.5085	4.0337	-1.84673	0.0204594	Unigene0059154	13.8135	38.09	1.46334	2.50893e-09	7.65161e-07	Creg1	Protein CREG1 [Zootermopsis nevadensis]	-	-	-	-	-	-	-
miR-1357-x	14.5085	4.0337	-1.84673	0.0204594	Unigene0060427	1.7656	7.9993	2.17972	7.02686e-07	0.000119057	--	Sphingomyelin phosphodiesterase [Zootermopsis nevadensis]	Cellular Processes;Metabolism	Global and overview maps;Transport and catabolism;Lipid metabolism	ko01100//Metabolic pathways;ko04142//Lysosome ;ko00600//Sphingolipid metabolism	K12350	-	-	-
miR-1357-x	14.5085	4.0337	-1.84673	0.0204594	Unigene0062571	4.6532	16.5872	1.83377	6.68959e-13	3.84309e-10	--	PREDICTED: protein eva-1 isoform X4 [Nicrophorus vespilloides]	-	-	-	-	-	-	-
miR-1357-x	14.5085	4.0337	-1.84673	0.0204594	Unigene0064477	10.8912	23.8707	1.13208	5.11377e-05	0.0045343	--	hypothetical protein L798_09464 [Zootermopsis nevadensis]	-	-	-	-	-	-	-
miR-1357-x	14.5085	4.0337	-1.84673	0.0204594	Unigene0065387	26.3922	59.1841	1.1651	3.20548e-06	0.000455086	HSD17B13	Epidermal retinal dehydrogenase 2 [Zootermopsis nevadensis]	-	-	-	-	-	-	-
miR-1357-x	14.5085	4.0337	-1.84673	0.0204594	Unigene0065410	11.3147	23.0624	1.02734	2.70927e-05	0.0027229	CdGAPr	PREDICTED: GTPase-activating protein CdGAPr isoform X1 [Cephus cinctus]	-	-	-	-	-	-	-
miR-1357-x	14.5085	4.0337	-1.84673	0.0204594	Unigene0066333	0.505933	5.70397	3.49495	0.000363045	0.0211776	nrf-6	Nose resistant to fluoxetine protein 6 [Zootermopsis nevadensis]	-	-	-	-	-	-	-
miR-1357-x	14.5085	4.0337	-1.84673	0.0204594	Unigene0068296	2.21887	5.25447	1.24372	5.85846e-06	0.000764105	--	hypothetical protein L798_14034 [Zootermopsis nevadensis]	-	-	-	-	-	-	-
miR-1357-x	14.5085	4.0337	-1.84673	0.0204594	Unigene0069758	4.47567	9.00657	1.00887	5.07922e-05	0.00451338	abcb6	ATP-binding cassette sub-family B member 6, mitochondrial [Zootermopsis nevadensis]	Environmental Information Processing	Membrane transport	ko02010//ABC transporters	K05661	-	-	-
miR-1357-x	14.5085	4.0337	-1.84673	0.0204594	Unigene0071775	3.6217	8.29333	1.19529	3.26064e-06	0.000461326	mlec	Malectin-B [Zootermopsis nevadensis]	-	-	-	-	-	-	-
miR-1357-x	14.5085	4.0337	-1.84673	0.0204594	Unigene0071999	146.686	332.008	1.17849	2.44163e-06	0.000359878	ubq-1	PREDICTED: polyubiquitin-C isoform X2 [Apis mellifera]	-	-	-	-	-	-	-
miR-1357-x	14.5085	4.0337	-1.84673	0.0204594	Unigene0072690	26.3386	74.9158	1.50809	9.87941e-10	3.24536e-07	Tret1	Sugar transporter ERD6-like 4 [Zootermopsis nevadensis]	-	-	-	-	-	-	-
miR-140-y	17.3067	2.01977	-3.09907	0.0175065	Unigene0000041	0.0616667	10.8153	7.45437	2.26916e-05	0.00236519	--	osiris 16-like protein [Lasius niger]	-	-	-	-	-	-	-
miR-140-y	17.3067	2.01977	-3.09907	0.0175065	Unigene0001076	1.12863	2.56927	1.18678	0.000190851	0.0128184	--	hypothetical protein L798_10476 [Zootermopsis nevadensis]	-	-	-	-	-	-	-
miR-140-y	17.3067	2.01977	-3.09907	0.0175065	Unigene0001123	5.67737	12.3958	1.12656	1.29497e-05	0.00146876	--	endonuclease-reverse transcriptase [Blattella germanica]	-	-	-	-	-	-	-
miR-140-y	17.3067	2.01977	-3.09907	0.0175065	Unigene0001268	3.68483	8.4953	1.20507	9.86403e-06	0.00116813	--	histone-lysine n-methyltransferase setmar [Lasius niger]	-	-	-	-	-	-	-
miR-140-y	17.3067	2.01977	-3.09907	0.0175065	Unigene0003650	1.2396	5.2796	2.09055	2.38466e-10	8.71424e-08	--	--	-	-	-	-	-	-	-
miR-140-y	17.3067	2.01977	-3.09907	0.0175065	Unigene0003691	3.84043	9.05497	1.23744	1.01013e-06	0.000164166	GRIK2	PREDICTED: glutamate receptor ionotropic, kainate 2 isoform X2 [Tribolium castaneum]	-	-	-	-	GO:0031224//intrinsic component of membrane;GO:0097060//synaptic membrane	GO:0005231//excitatory extracellular ligand-gated ion channel activity	GO:0006811//ion transport;GO:0007215//glutamate receptor signaling pathway
miR-140-y	17.3067	2.01977	-3.09907	0.0175065	Unigene0004413	2.69953	13.0508	2.27335	2.03031e-14	1.52911e-11	Cyp6a14	cytochrome P450 [Hodotermopsis sjostedti]	-	-	-	-	-	GO:0016712//oxidoreductase activity, acting on paired donors, with incorporation or reduction of molecular oxygen, reduced flavin or flavoprotein as one donor, and incorporation of one atom of oxygen;GO:0046906//tetrapyrrole binding;GO:0046914//transition metal ion binding	GO:0044710//single-organism metabolic process
miR-140-y	17.3067	2.01977	-3.09907	0.0175065	Unigene0004734	0.614533	3.88113	2.65891	8.63868e-10	2.8838e-07	GGPS1	Geranylgeranyl pyrophosphate synthetase [Zootermopsis nevadensis]	Metabolism	Global and overview maps;Metabolism of terpenoids and polyketides	ko01100//Metabolic pathways;ko00900//Terpenoid backbone biosynthesis	K00804	-	-	-
miR-140-y	17.3067	2.01977	-3.09907	0.0175065	Unigene0005052	1.61817	3.50507	1.11508	9.31012e-05	0.00731048	RCL1	PREDICTED: probable RNA 3'-terminal phosphate cyclase-like protein [Rhagoletis zephyria]	Genetic Information Processing	Translation	ko03008//Ribosome biogenesis in eukaryotes	K11108	-	GO:0003824//catalytic activity	-
miR-140-y	17.3067	2.01977	-3.09907	0.0175065	Unigene0005195	186.44	495.912	1.41138	3.41216e-05	0.00328491	PebIII	ejaculatory bulb-specific protein III [Coptotermes formosanus]	-	-	-	-	-	-	-
miR-140-y	17.3067	2.01977	-3.09907	0.0175065	Unigene0006524	6.25787	32.7384	2.38724	2.34088e-06	0.000347517	--	--	-	-	-	-	-	-	-
miR-140-y	17.3067	2.01977	-3.09907	0.0175065	Unigene0007263	5.3711	11.285	1.07111	7.99372e-05	0.00649142	per	Period circadian protein [Zootermopsis nevadensis]	Organismal Systems	Environmental adaptation	ko04711//Circadian rhythm - fly	K02633	-	-	-
miR-140-y	17.3067	2.01977	-3.09907	0.0175065	Unigene0008365	4.03787	10.0844	1.32046	2.11896e-07	4.07398e-05	TFAP2B	PREDICTED: transcription factor AP-2-epsilon isoform X2 [Megachile rotundata]	-	-	-	-	GO:0043231//intracellular membrane-bounded organelle	-	GO:0010468//regulation of gene expression
miR-140-y	17.3067	2.01977	-3.09907	0.0175065	Unigene0011319	0.1757	3.51097	4.32068	1.20552e-05	0.0013877	AAEL008004	Elongation of very long chain fatty acids protein 7 [Zootermopsis nevadensis]	-	-	-	-	-	-	-
miR-140-y	17.3067	2.01977	-3.09907	0.0175065	Unigene0011328	6.8301	16.0096	1.22896	4.06453e-06	0.000557811	HMT-2	Homocysteine S-methyltransferase 2 [Zootermopsis nevadensis]	Metabolism	Amino acid metabolism;Global and overview maps	ko01100//Metabolic pathways;ko00270//Cysteine and methionine metabolism	K00547	-	-	-
miR-140-y	17.3067	2.01977	-3.09907	0.0175065	Unigene0011775	5.37433	18.1411	1.7551	1.50722e-11	7.24373e-09	--	GM16903 [Drosophila sechellia]	-	-	-	-	-	-	-
miR-140-y	17.3067	2.01977	-3.09907	0.0175065	Unigene0013587	3.1894	10.5935	1.73182	2.49757e-11	1.12999e-08	--	Peptidyl-prolyl cis-trans isomerase SDCCAG10, partial [Zootermopsis nevadensis]	-	-	-	-	-	-	-
miR-140-y	17.3067	2.01977	-3.09907	0.0175065	Unigene0013971	0.253233	0.915267	1.85372	1.15975e-05	0.00134251	--	hypothetical protein L798_03788 [Zootermopsis nevadensis]	-	-	-	-	-	-	-
miR-140-y	17.3067	2.01977	-3.09907	0.0175065	Unigene0041253	0.141833	3.87333	4.77131	0.00084452	0.0397072	Sb	PREDICTED: trypsin-1-like isoform X1 [Cimex lectularius]	-	-	-	-	-	-	-
miR-140-y	17.3067	2.01977	-3.09907	0.0175065	Unigene0043439	3.3603	8.70217	1.37278	1.19533e-06	0.00019075	ski	Ski oncogene [Zootermopsis nevadensis]	-	-	-	-	-	-	-
miR-140-y	17.3067	2.01977	-3.09907	0.0175065	Unigene0046101	0.001	1.22097	10.2538	0.000217491	0.014236	--	EB module, partial [Coptotermes formosanus]	-	-	-	-	-	-	-
miR-140-y	17.3067	2.01977	-3.09907	0.0175065	Unigene0046265	1.86063	4.96443	1.41584	3.16065e-07	5.818e-05	--	PREDICTED: zinc finger protein 253-like, partial [Octopus bimaculoides]	-	-	-	-	-	-	-
miR-140-y	17.3067	2.01977	-3.09907	0.0175065	Unigene0046309	1.76823	3.9214	1.14906	4.98704e-05	0.00444846	Polr3e	DNA-directed RNA polymerase III subunit RPC5 [Zootermopsis nevadensis]	Genetic Information Processing;Metabolism	Transcription;Nucleotide metabolism	ko00230//Purine metabolism ;ko00240//Pyrimidine metabolism ;ko03020//RNA polymerase	K14721	-	-	-
miR-140-y	17.3067	2.01977	-3.09907	0.0175065	Unigene0046640	0.123967	1.5776	3.66971	2.99398e-05	0.0029396	GGH	Gamma-glutamyl hydrolase [Zootermopsis nevadensis]	Metabolism	Metabolism of cofactors and vitamins	ko00790//Folate biosynthesis	K01307	-	-	-
miR-140-y	17.3067	2.01977	-3.09907	0.0175065	Unigene0048058	1.89123	3.91743	1.05058	0.000530589	0.0281632	--	PREDICTED: zinc finger protein 91-like [Octopus bimaculoides]	-	-	-	-	-	-	-
miR-140-y	17.3067	2.01977	-3.09907	0.0175065	Unigene0048643	41.8092	99.3696	1.24898	6.15812e-07	0.000105349	Inx3	PREDICTED: innexin inx3 [Papilio polytes]	-	-	-	-	GO:0031224//intrinsic component of membrane	-	GO:0044765//single-organism transport
miR-140-y	17.3067	2.01977	-3.09907	0.0175065	Unigene0048723	3.22943	6.8708	1.0892	1.84292e-05	0.00197938	Mblk-1	Mushroom body large-type Kenyon cell-specific protein 1 [Zootermopsis nevadensis]	Cellular Processes	Cell growth and death	ko04214//Apoptosis - fly	K20015	-	-	-
miR-140-y	17.3067	2.01977	-3.09907	0.0175065	Unigene0048910	4.5773	9.95963	1.1216	3.3284e-05	0.0032168	CG2614	Methyltransferase-like protein 13 [Zootermopsis nevadensis]	-	-	-	-	-	-	-
miR-140-y	17.3067	2.01977	-3.09907	0.0175065	Unigene0049515	3.5774	11.7483	1.71547	2.72112e-06	0.000394019	YPEL1	PREDICTED: protein yippee-like 2 [Bemisia tabaci]	-	-	-	-	-	-	-
miR-140-y	17.3067	2.01977	-3.09907	0.0175065	Unigene0049525	7.60823	33.7861	2.1508	1.08226e-15	1.03624e-12	h	Hairy protein [Periplaneta americana]	-	-	-	-	-	-	-
miR-140-y	17.3067	2.01977	-3.09907	0.0175065	Unigene0050233	0.0829	7.8928	6.57302	5.46085e-06	0.00071755	Sb	Serine proteinase stubble [Zootermopsis nevadensis]	-	-	-	-	-	-	-
miR-140-y	17.3067	2.01977	-3.09907	0.0175065	Unigene0050422	2.4043	5.72143	1.25076	6.66941e-06	0.000851884	Aats-cys	PREDICTED: cysteine--tRNA ligase, cytoplasmic [Neodiprion lecontei]	Genetic Information Processing	Translation	ko00970//Aminoacyl-tRNA biosynthesis	K01883	-	GO:0004812//aminoacyl-tRNA ligase activity;GO:0032550//purine ribonucleoside binding	GO:0006418//tRNA aminoacylation for protein translation
miR-140-y	17.3067	2.01977	-3.09907	0.0175065	Unigene0050825	1.92777	4.17357	1.11435	0.000189688	0.012761	Mcm6	DNA replication licensing factor Mcm6 [Zootermopsis nevadensis]	Genetic Information Processing	Replication and repair	ko03030//DNA replication	K02542	GO:0043231//intracellular membrane-bounded organelle;GO:0043234//protein complex	GO:0003676//nucleic acid binding;GO:0004386//helicase activity;GO:0032550//purine ribonucleoside binding	GO:0006259//DNA metabolic process;GO:0032392//DNA geometric change
miR-140-y	17.3067	2.01977	-3.09907	0.0175065	Unigene0051718	10.9301	28.9282	1.40417	1.10014e-07	2.29534e-05	ITIH4	PREDICTED: inter-alpha-trypsin inhibitor heavy chain H4-like [Halyomorpha halys]	-	-	-	-	-	-	-
miR-140-y	17.3067	2.01977	-3.09907	0.0175065	Unigene0051940	8.04857	17.3779	1.11045	3.13676e-05	0.00305068	nifk	MKI67 FHA domain-interacting nucleolar phosphoprotein-like [Zootermopsis nevadensis]	-	-	-	-	-	-	-
miR-140-y	17.3067	2.01977	-3.09907	0.0175065	Unigene0053447	0.949033	2.21263	1.22123	0.00011429	0.00859196	pain	Transient receptor potential cation channel protein painless [Zootermopsis nevadensis]	-	-	-	-	-	-	-
miR-140-y	17.3067	2.01977	-3.09907	0.0175065	Unigene0054032	1.43597	2.9589	1.04304	0.000295876	0.0179937	--	RNA exonuclease 1-like protein [Zootermopsis nevadensis]	Genetic Information Processing	Translation	ko03008//Ribosome biogenesis in eukaryotes	K14570	-	-	-
miR-140-y	17.3067	2.01977	-3.09907	0.0175065	Unigene0054500	28.6996	59.2881	1.04671	1.90856e-05	0.00203396	ADAMTS2	A disintegrin and metalloproteinase with thrombospondin motifs 3 [Zootermopsis nevadensis]	-	-	-	-	-	-	-
miR-140-y	17.3067	2.01977	-3.09907	0.0175065	Unigene0056734	16.4333	34.8725	1.08547	8.34645e-06	0.00102448	PSMA1	Proteasome subunit alpha type-1 [Zootermopsis nevadensis]	Genetic Information Processing	Folding, sorting and degradation	ko03050//Proteasome	K02725	-	-	-
miR-140-y	17.3067	2.01977	-3.09907	0.0175065	Unigene0057363	26.4465	81.4372	1.62261	1.01934e-10	4.02248e-08	--	PREDICTED: glycogenin-1 isoform X2 [Apis cerana]	Metabolism	Carbohydrate metabolism;Global and overview maps	ko01100//Metabolic pathways;ko00500//Starch and sucrose metabolism	K00750	-	-	-
miR-140-y	17.3067	2.01977	-3.09907	0.0175065	Unigene0059582	0.4167	8.8134	4.40262	1.72048e-08	4.4738e-06	Sb	trypsin-7 [Nilaparvata lugens]	-	-	-	-	-	GO:0004175//endopeptidase activity	GO:0019538//protein metabolic process
miR-140-y	17.3067	2.01977	-3.09907	0.0175065	Unigene0059721	3.4873	23.7964	2.77056	1.06481e-14	8.43076e-12	--	AGAP002550-PA [Anopheles gambiae str. PEST] [Anopheles gambiae]	-	-	-	-	-	-	-
miR-140-y	17.3067	2.01977	-3.09907	0.0175065	Unigene0062469	51.8015	110.257	1.0898	4.46762e-05	0.00408452	Sesn	Sestrin-like protein [Zootermopsis nevadensis]	-	-	-	-	-	-	GO:1902882//regulation of response to oxidative stress
miR-140-y	17.3067	2.01977	-3.09907	0.0175065	Unigene0062477	10.239	36.4178	1.83056	4.8805e-11	2.05039e-08	Sox11	Transcription factor Sox-11-A [Zootermopsis nevadensis]	-	-	-	-	-	-	-
miR-140-y	17.3067	2.01977	-3.09907	0.0175065	Unigene0062571	4.6532	16.5872	1.83377	6.68959e-13	3.84309e-10	--	PREDICTED: protein eva-1 isoform X4 [Nicrophorus vespilloides]	-	-	-	-	-	-	-
miR-140-y	17.3067	2.01977	-3.09907	0.0175065	Unigene0064382	13.9801	40.2775	1.5266	2.32694e-09	7.1318e-07	tubb1	beta-tubulin 4 [Nilaparvata lugens]	Cellular Processes	Transport and catabolism	ko04145//Phagosome	K07375	-	-	-
miR-140-y	17.3067	2.01977	-3.09907	0.0175065	Unigene0065154	5.2931	12.4275	1.23135	1.64684e-06	0.000251744	Tbl3	Transducin beta-like protein 3 [Zootermopsis nevadensis]	Genetic Information Processing	Translation	ko03008//Ribosome biogenesis in eukaryotes	K14555	-	-	-
miR-140-y	17.3067	2.01977	-3.09907	0.0175065	Unigene0065410	11.3147	23.0624	1.02734	2.70927e-05	0.0027229	CdGAPr	PREDICTED: GTPase-activating protein CdGAPr isoform X1 [Cephus cinctus]	-	-	-	-	-	-	-
miR-140-y	17.3067	2.01977	-3.09907	0.0175065	Unigene0067549	4.38553	11.249	1.35897	7.44544e-08	1.63054e-05	KEAP1	Kelch-like ECH-associated protein 1 [Zootermopsis nevadensis]	Genetic Information Processing	Folding, sorting and degradation	ko04120//Ubiquitin mediated proteolysis	K10456	-	-	-
miR-140-y	17.3067	2.01977	-3.09907	0.0175065	Unigene0067588	1.17457	3.73193	1.66779	2.2799e-07	4.325e-05	Ush1g	PREDICTED: Usher syndrome type-1G protein homolog isoform X1 [Athalia rosae]	-	-	-	-	-	-	-
miR-140-y	17.3067	2.01977	-3.09907	0.0175065	Unigene0069758	4.47567	9.00657	1.00887	5.07922e-05	0.00451338	abcb6	ATP-binding cassette sub-family B member 6, mitochondrial [Zootermopsis nevadensis]	Environmental Information Processing	Membrane transport	ko02010//ABC transporters	K05661	-	-	-
miR-140-y	17.3067	2.01977	-3.09907	0.0175065	Unigene0071775	3.6217	8.29333	1.19529	3.26064e-06	0.000461326	mlec	Malectin-B [Zootermopsis nevadensis]	-	-	-	-	-	-	-
miR-140-y	17.3067	2.01977	-3.09907	0.0175065	Unigene0072595	4.10717	10.4111	1.34191	0.000149475	0.0106167	IL16	Pro-interleukin-16 [Zootermopsis nevadensis]	-	-	-	-	-	-	-
miR-140-y	17.3067	2.01977	-3.09907	0.0175065	Unigene0072690	26.3386	74.9158	1.50809	9.87941e-10	3.24536e-07	Tret1	Sugar transporter ERD6-like 4 [Zootermopsis nevadensis]	-	-	-	-	-	-	-
miR-140-y	17.3067	2.01977	-3.09907	0.0175065	Unigene0073643	3.04197	7.15737	1.23442	8.7329e-06	0.00106251	ASNS	Asparagine synthetase [glutamine-hydrolyzing] [Zootermopsis nevadensis]	Metabolism	Amino acid metabolism;Global and overview maps	ko01100//Metabolic pathways;ko01230//Biosynthesis of amino acids;ko00250//Alanine, aspartate and glutamate metabolism	K01953	-	GO:0016884//carbon-nitrogen ligase activity, with glutamine as amido-N-donor;GO:0032550//purine ribonucleoside binding	GO:0006529//asparagine biosynthetic process
miR-140-y	17.3067	2.01977	-3.09907	0.0175065	Unigene0074012	324.781	1471.75	2.17999	1.69605e-14	1.29313e-11	--	Leucine-rich repeat-containing protein 20 [Zootermopsis nevadensis]	-	-	-	-	-	-	-
miR-140-y	17.3067	2.01977	-3.09907	0.0175065	Unigene0074261	357.29	851.187	1.25238	2.98134e-05	0.00292952	to	Protein takeout [Zootermopsis nevadensis]	-	-	-	-	-	-	-
miR-140-y	17.3067	2.01977	-3.09907	0.0175065	Unigene0074473	2.13533	4.63633	1.11852	0.000107436	0.00815606	--	hypothetical protein L798_15543 [Zootermopsis nevadensis]	-	-	-	-	-	-	-
miR-140-y	17.3067	2.01977	-3.09907	0.0175065	Unigene0074499	13.5278	27.3773	1.01705	6.14896e-05	0.00525221	IYD	Iodotyrosine dehalogenase 1, partial [Zootermopsis nevadensis]	-	-	-	-	-	-	-
miR-140-y	17.3067	2.01977	-3.09907	0.0175065	Unigene0075113	9.41943	27.2963	1.53499	3.93053e-08	9.35413e-06	Ece1	Endothelin-converting enzyme 1 [Zootermopsis nevadensis]	-	-	-	-	-	-	-
miR-140-y	17.3067	2.01977	-3.09907	0.0175065	Unigene0078427	1.59387	4.2131	1.40235	9.09668e-07	0.000149412	RWDD2A	RWD domain-containing protein 2A [Zootermopsis nevadensis]	-	-	-	-	-	-	-
miR-140-y	17.3067	2.01977	-3.09907	0.0175065	Unigene0103894	2.52573	8.7385	1.79068	9.24782e-08	1.95925e-05	--	PREDICTED: uncharacterized protein LOC108678312 [Hyalella azteca]	-	-	-	-	-	-	-
miR-142-x	418.947	47.2821	-3.1474	0.0017022	Unigene0001082	5.81447	12.1796	1.06675	6.04212e-05	0.00518619	Usp45	Ubiquitin carboxyl-terminal hydrolase 16, partial [Zootermopsis nevadensis]	-	-	-	-	-	-	-
miR-142-x	418.947	47.2821	-3.1474	0.0017022	Unigene0004696	3.11633	6.3693	1.03129	8.68489e-05	0.00690737	bwa	Alkaline ceramidase [Zootermopsis nevadensis]	Metabolism	Lipid metabolism;Global and overview maps	ko01100//Metabolic pathways;ko00600//Sphingolipid metabolism	K01441	GO:0031224//intrinsic component of membrane	GO:0016810//hydrolase activity, acting on carbon-nitrogen (but not peptide) bonds	-
miR-142-x	418.947	47.2821	-3.1474	0.0017022	Unigene0005998	5.99127	12.4726	1.05783	4.59602e-05	0.00417717	Nelf-E	Negative elongation factor E [Zootermopsis nevadensis]	-	-	-	-	-	GO:0008135//translation factor activity, RNA binding	GO:0034645//cellular macromolecule biosynthetic process
miR-142-x	418.947	47.2821	-3.1474	0.0017022	Unigene0006524	6.25787	32.7384	2.38724	2.34088e-06	0.000347517	--	--	-	-	-	-	-	-	-
miR-142-x	418.947	47.2821	-3.1474	0.0017022	Unigene0007263	5.3711	11.285	1.07111	7.99372e-05	0.00649142	per	Period circadian protein [Zootermopsis nevadensis]	Organismal Systems	Environmental adaptation	ko04711//Circadian rhythm - fly	K02633	-	-	-
miR-142-x	418.947	47.2821	-3.1474	0.0017022	Unigene0008233	1.27913	2.95137	1.20622	6.01322e-05	0.00516497	NLK	nemo-like protein [Nilaparvata lugens]	Environmental Information Processing	Signal transduction	ko04010//MAPK signaling pathway ;ko04310//Wnt signaling pathway ;ko04068//FoxO signaling pathway	K04468	-	GO:0004702//receptor signaling protein serine/threonine kinase activity;GO:0032550//purine ribonucleoside binding	GO:0006464//cellular protein modification process;GO:0006796//phosphate-containing compound metabolic process
miR-142-x	418.947	47.2821	-3.1474	0.0017022	Unigene0008365	4.03787	10.0844	1.32046	2.11896e-07	4.07398e-05	TFAP2B	PREDICTED: transcription factor AP-2-epsilon isoform X2 [Megachile rotundata]	-	-	-	-	GO:0043231//intracellular membrane-bounded organelle	-	GO:0010468//regulation of gene expression
miR-142-x	418.947	47.2821	-3.1474	0.0017022	Unigene0011770	1.55633	4.98463	1.67934	5.51245e-09	1.5545e-06	--	PREDICTED: tumor necrosis factor receptor superfamily member 14-like [Cephus cinctus]	-	-	-	-	-	-	-
miR-142-x	418.947	47.2821	-3.1474	0.0017022	Unigene0013607	0.578567	1.50983	1.38383	0.00105702	0.0464121	--	putative lian-aa1 retrotransposon protein, partial [Corethrella appendiculata]	-	-	-	-	-	-	-
miR-142-x	418.947	47.2821	-3.1474	0.0017022	Unigene0013982	20.6721	67.1745	1.70023	3.50716e-10	1.23768e-07	BNIP3	BCL2/adenovirus E1B 19 kDa protein-interacting protein 3-like [Zootermopsis nevadensis]	Cellular Processes;Environmental Information Processing	Signal transduction;Transport and catabolism	ko04140//Autophagy - animal ;ko04068//FoxO signaling pathway ;ko04137//Mitophagy - animal	K15464	GO:0031224//intrinsic component of membrane	-	GO:0042981//regulation of apoptotic process
miR-142-x	418.947	47.2821	-3.1474	0.0017022	Unigene0014003	13.0964	27.5702	1.07394	4.07266e-05	0.0038051	celD	Endoglucanase F [Zootermopsis nevadensis]	Metabolism	Global and overview maps;Carbohydrate metabolism	ko01100//Metabolic pathways;ko00520//Amino sugar and nucleotide sugar metabolism ;ko00500//Starch and sucrose metabolism	K01179	GO:0031224//intrinsic component of membrane	GO:0004553//hydrolase activity, hydrolyzing O-glycosyl compounds	GO:0030243//cellulose metabolic process
miR-142-x	418.947	47.2821	-3.1474	0.0017022	Unigene0014266	50.8585	119.316	1.23023	3.53325e-07	6.43671e-05	Sam-S	S-adenosylmethionine synthetase [Zootermopsis nevadensis]	Metabolism	Amino acid metabolism;Global and overview maps	ko01100//Metabolic pathways;ko01230//Biosynthesis of amino acids;ko00270//Cysteine and methionine metabolism	K00789	-	-	-
miR-142-x	418.947	47.2821	-3.1474	0.0017022	Unigene0032281	0.0296667	14.6347	8.94634	1.67127e-06	0.000255056	--	hypothetical protein L798_02768 [Zootermopsis nevadensis]	-	-	-	-	-	-	-
miR-142-x	418.947	47.2821	-3.1474	0.0017022	Unigene0035078	0.145133	17.5516	6.91808	0.000857335	0.0400203	--	PREDICTED: osiris 20 isoform X1 [Bombyx mori]	-	-	-	-	-	-	-
miR-142-x	418.947	47.2821	-3.1474	0.0017022	Unigene0041049	0.001	1.90363	10.8945	0.000191663	0.0128394	ndk	PREDICTED: nucleoside diphosphate kinase [Ceratitis capitata]	Metabolism	Xenobiotics biodegradation and metabolism;Global and overview maps;Nucleotide metabolism	ko01100//Metabolic pathways;ko00230//Purine metabolism ;ko00240//Pyrimidine metabolism ;ko00983//Drug metabolism - other enzymes	K00940	GO:0015630//microtubule cytoskeleton;GO:0016020//membrane;GO:0043234//protein complex	GO:0015631//tubulin binding;GO:0016776//phosphotransferase activity, phosphate group as acceptor;GO:0032550//purine ribonucleoside binding;GO:0046872//metal ion binding	GO:0000280//nuclear division;GO:0006468//protein phosphorylation;GO:0007163//establishment or maintenance of cell polarity;GO:0009132//nucleoside diphosphate metabolic process;GO:0009209//pyrimidine ribonucleoside triphosphate biosynthetic process;GO:0009260//ribonucleotide biosynthetic process;GO:0010631//epithelial cell migration;GO:0045216//cell-cell junction organization;GO:0060541//respirato…
miR-142-x	418.947	47.2821	-3.1474	0.0017022	Unigene0041253	0.141833	3.87333	4.77131	0.00084452	0.0397072	Sb	PREDICTED: trypsin-1-like isoform X1 [Cimex lectularius]	-	-	-	-	-	-	-
miR-142-x	418.947	47.2821	-3.1474	0.0017022	Unigene0044789	0.495133	1.64337	1.73077	0.000226697	0.0147216	--	Mite allergen Lep d 7 [Zootermopsis nevadensis]	-	-	-	-	-	-	-
miR-142-x	418.947	47.2821	-3.1474	0.0017022	Unigene0046825	18.1032	43.5442	1.26623	0.000170324	0.0117594	Spon1	PREDICTED: somatomedin-B and thrombospondin type-1 domain-containing protein [Acyrthosiphon pisum]	-	-	-	-	-	-	-
miR-142-x	418.947	47.2821	-3.1474	0.0017022	Unigene0047409	4.09213	8.36887	1.03218	5.81545e-05	0.00502305	Utp14b	U3 small nucleolar RNA-associated protein 14-like protein A [Zootermopsis nevadensis]	Genetic Information Processing	Translation	ko03008//Ribosome biogenesis in eukaryotes	K14567	-	-	-
miR-142-x	418.947	47.2821	-3.1474	0.0017022	Unigene0048331	0.686367	1.79593	1.38768	0.000126944	0.00932191	--	conserved Plasmodium protein, unknown function [Plasmodium vivax]	-	-	-	-	-	-	-
miR-142-x	418.947	47.2821	-3.1474	0.0017022	Unigene0048608	5.60423	13.3221	1.24923	2.33006e-06	0.000346327	CG11837	PREDICTED: probable dimethyladenosine transferase [Cephus cinctus]	-	-	-	-	-	GO:0008170//N-methyltransferase activity;GO:0008173//RNA methyltransferase activity	GO:0000154//rRNA modification
miR-142-x	418.947	47.2821	-3.1474	0.0017022	Unigene0048643	41.8092	99.3696	1.24898	6.15812e-07	0.000105349	Inx3	PREDICTED: innexin inx3 [Papilio polytes]	-	-	-	-	GO:0031224//intrinsic component of membrane	-	GO:0044765//single-organism transport
miR-142-x	418.947	47.2821	-3.1474	0.0017022	Unigene0048690	1.5928	5.88413	1.88526	6.21172e-12	3.14443e-09	--	GD10515 [Drosophila simulans]	-	-	-	-	-	-	-
miR-142-x	418.947	47.2821	-3.1474	0.0017022	Unigene0049105	0.266133	4.48067	4.07349	3.15382e-28	1.39123e-24	ACP21	PREDICTED: cuticle protein 19 [Cimex lectularius]	-	-	-	-	-	-	-
miR-142-x	418.947	47.2821	-3.1474	0.0017022	Unigene0049212	2.59333	7.76173	1.58157	2.34712e-08	5.7981e-06	--	HEAT repeat-containing protein 3 [Zootermopsis nevadensis]	-	-	-	-	-	-	-
miR-142-x	418.947	47.2821	-3.1474	0.0017022	Unigene0049711	0.001	3.17673	11.6333	0.000173362	0.0118828	--	putative unknown product, partial [Corethrella appendiculata]	-	-	-	-	-	-	-
miR-142-x	418.947	47.2821	-3.1474	0.0017022	Unigene0049767	25.5394	103.758	2.02243	5.40726e-11	2.26399e-08	--	hypothetical protein L798_04498 [Zootermopsis nevadensis]	-	-	-	-	-	-	-
miR-142-x	418.947	47.2821	-3.1474	0.0017022	Unigene0050202	7.31317	19.2982	1.3999	5.66731e-08	1.29151e-05	Rtkn	Rhotekin [Zootermopsis nevadensis]	-	-	-	-	-	-	-
miR-142-x	418.947	47.2821	-3.1474	0.0017022	Unigene0050354	0.001	13.6662	13.7383	2.11336e-05	0.00222914	--	endonuclease-reverse transcriptase [Blattella germanica]	-	-	-	-	-	-	-
miR-142-x	418.947	47.2821	-3.1474	0.0017022	Unigene0050355	0.001	0.9022	9.8173	0.000490808	0.0265421	--	endonuclease-reverse transcriptase [Blattella germanica]	-	-	-	-	-	-	-
miR-142-x	418.947	47.2821	-3.1474	0.0017022	Unigene0051581	0.2836	1.12937	1.99358	7.24011e-06	0.000910654	--	DNA polymerase V [Zootermopsis nevadensis]	-	-	-	-	-	-	-
miR-142-x	418.947	47.2821	-3.1474	0.0017022	Unigene0051632	36.1932	107.896	1.57585	2.39977e-07	4.51153e-05	--	juvenile hormone binding protein domain protein [Coptotermes formosanus]	-	-	-	-	-	-	-
miR-142-x	418.947	47.2821	-3.1474	0.0017022	Unigene0051792	0.630433	1.39413	1.14495	9.34777e-05	0.0073196	B0563.6	PREDICTED: probable G-protein coupled receptor B0563.6 [Neodiprion lecontei]	-	-	-	-	-	-	-
miR-142-x	418.947	47.2821	-3.1474	0.0017022	Unigene0052670	0.79	3.35567	2.08667	1.46775e-07	2.92402e-05	Abhd3	Abhydrolase domain-containing protein 3 [Zootermopsis nevadensis]	-	-	-	-	-	-	-
miR-142-x	418.947	47.2821	-3.1474	0.0017022	Unigene0053611	5.22413	10.7558	1.04186	6.51059e-05	0.00550274	IPO4	Importin-4, partial [Zootermopsis nevadensis]	-	-	-	-	-	-	-
miR-142-x	418.947	47.2821	-3.1474	0.0017022	Unigene0054032	1.43597	2.9589	1.04304	0.000295876	0.0179937	--	RNA exonuclease 1-like protein [Zootermopsis nevadensis]	Genetic Information Processing	Translation	ko03008//Ribosome biogenesis in eukaryotes	K14570	-	-	-
miR-142-x	418.947	47.2821	-3.1474	0.0017022	Unigene0054500	28.6996	59.2881	1.04671	1.90856e-05	0.00203396	ADAMTS2	A disintegrin and metalloproteinase with thrombospondin motifs 3 [Zootermopsis nevadensis]	-	-	-	-	-	-	-
miR-142-x	418.947	47.2821	-3.1474	0.0017022	Unigene0055492	4.47857	9.64333	1.10649	1.36947e-05	0.00153634	MDN1	Midasin [Zootermopsis nevadensis]	Genetic Information Processing	Translation	ko03008//Ribosome biogenesis in eukaryotes	K14572	-	-	-
miR-142-x	418.947	47.2821	-3.1474	0.0017022	Unigene0055663	0.438067	5.18573	3.56533	0.000956884	0.0433475	--	PREDICTED: zinc finger CCCH domain-containing protein 4-like [Halyomorpha halys]	-	-	-	-	-	-	-
miR-142-x	418.947	47.2821	-3.1474	0.0017022	Unigene0057020	42.3286	89.9525	1.08753	1.28813e-05	0.00146639	--	PREDICTED: ras guanine nucleotide exchange factor P-like [Diaphorina citri]	-	-	-	-	-	-	-
miR-142-x	418.947	47.2821	-3.1474	0.0017022	Unigene0057091	32.667	84.0628	1.36363	4.07551e-07	7.32732e-05	PebIII	chemosensory protein [Blattella germanica]	-	-	-	-	-	-	-
miR-142-x	418.947	47.2821	-3.1474	0.0017022	Unigene0057363	26.4465	81.4372	1.62261	1.01934e-10	4.02248e-08	--	PREDICTED: glycogenin-1 isoform X2 [Apis cerana]	Metabolism	Carbohydrate metabolism;Global and overview maps	ko01100//Metabolic pathways;ko00500//Starch and sucrose metabolism	K00750	-	-	-
miR-142-x	418.947	47.2821	-3.1474	0.0017022	Unigene0059154	13.8135	38.09	1.46334	2.50893e-09	7.65161e-07	Creg1	Protein CREG1 [Zootermopsis nevadensis]	-	-	-	-	-	-	-
miR-142-x	418.947	47.2821	-3.1474	0.0017022	Unigene0059825	0.8207	3.3537	2.03083	1.41701e-10	5.40191e-08	LCP17	PREDICTED: endocuticle structural glycoprotein SgAbd-2-like isoform X1 [Agrilus planipennis]	-	-	-	-	-	-	-
miR-142-x	418.947	47.2821	-3.1474	0.0017022	Unigene0060481	0.658467	6.1772	3.22977	0.000780973	0.0376363	--	AAEL010623-PA [Aedes aegypti]	-	-	-	-	-	-	-
miR-142-x	418.947	47.2821	-3.1474	0.0017022	Unigene0061594	6.12603	16.8085	1.45616	2.52043e-07	4.71683e-05	--	PREDICTED: anosmin-1 [Anoplophora glabripennis]	-	-	-	-	-	-	-
miR-142-x	418.947	47.2821	-3.1474	0.0017022	Unigene0062477	10.239	36.4178	1.83056	4.8805e-11	2.05039e-08	Sox11	Transcription factor Sox-11-A [Zootermopsis nevadensis]	-	-	-	-	-	-	-
miR-142-x	418.947	47.2821	-3.1474	0.0017022	Unigene0062571	4.6532	16.5872	1.83377	6.68959e-13	3.84309e-10	--	PREDICTED: protein eva-1 isoform X4 [Nicrophorus vespilloides]	-	-	-	-	-	-	-
miR-142-x	418.947	47.2821	-3.1474	0.0017022	Unigene0063308	1.4262	3.97167	1.47757	1.84668e-07	3.62628e-05	Vegfc	Platelet-derived growth factor subunit A [Zootermopsis nevadensis]	Environmental Information Processing	Signal transduction	ko04010//MAPK signaling pathway	K04359	-	-	-
miR-142-x	418.947	47.2821	-3.1474	0.0017022	Unigene0064457	7.99983	20.7579	1.37562	2.43538e-07	4.56458e-05	UGT2B7	UDP-glucuronosyltransferase 2B7, partial [Zootermopsis nevadensis]	Metabolism	Xenobiotics biodegradation and metabolism;Metabolism of cofactors and vitamins;Carbohydrate metabolism;Global and overview maps	ko01100//Metabolic pathways;ko00983//Drug metabolism - other enzymes ;ko00040//Pentose and glucuronate interconversions ;ko00860//Porphyrin and chlorophyll metabolism ;ko00980//Metabolism of xenobiotics by cytochrome P450 ;ko00982//Drug metabolism - cytochrome P450 ;ko00053//Ascorbate and aldarate metabolism ;ko00830//Retinol metabolism	K00699	-	-	-
miR-142-x	418.947	47.2821	-3.1474	0.0017022	Unigene0064507	4.19187	11.2092	1.41902	5.43362e-07	9.43929e-05	--	THAP domain-containing protein 9, partial [Stegodyphus mimosarum]	-	-	-	-	-	-	-
miR-142-x	418.947	47.2821	-3.1474	0.0017022	Unigene0066235	2.0088	5.167	1.36299	5.9963e-06	0.000778793	--	Noggin-2 [Zootermopsis nevadensis]	Environmental Information Processing	Signal transduction	ko04350//TGF-beta signaling pathway	K04658	-	-	-
miR-142-x	418.947	47.2821	-3.1474	0.0017022	Unigene0069758	4.47567	9.00657	1.00887	5.07922e-05	0.00451338	abcb6	ATP-binding cassette sub-family B member 6, mitochondrial [Zootermopsis nevadensis]	Environmental Information Processing	Membrane transport	ko02010//ABC transporters	K05661	-	-	-
miR-142-x	418.947	47.2821	-3.1474	0.0017022	Unigene0070982	4.05897	10.3508	1.35056	3.45759e-07	6.31753e-05	RECK	Reversion-inducing cysteine-rich protein with Kazal motifs, partial [Zootermopsis nevadensis]	-	-	-	-	-	-	-
miR-142-x	418.947	47.2821	-3.1474	0.0017022	Unigene0071775	3.6217	8.29333	1.19529	3.26064e-06	0.000461326	mlec	Malectin-B [Zootermopsis nevadensis]	-	-	-	-	-	-	-
miR-142-x	418.947	47.2821	-3.1474	0.0017022	Unigene0073843	5.84577	11.8636	1.02108	0.000102318	0.00784473	DDX56	PREDICTED: probable ATP-dependent RNA helicase DDX56 [Megachile rotundata]	-	-	-	-	-	-	-
miR-142-x	418.947	47.2821	-3.1474	0.0017022	Unigene0073996	3.79303	13.8296	1.86633	2.57233e-06	0.000377341	--	PREDICTED: mucin-5AC [Linepithema humile]	-	-	-	-	-	-	-
miR-142-x	418.947	47.2821	-3.1474	0.0017022	Unigene0074012	324.781	1471.75	2.17999	1.69605e-14	1.29313e-11	--	Leucine-rich repeat-containing protein 20 [Zootermopsis nevadensis]	-	-	-	-	-	-	-
miR-142-x	418.947	47.2821	-3.1474	0.0017022	Unigene0075754	2.55733	5.75473	1.17011	2.17987e-05	0.00228756	DDX52	PREDICTED: probable ATP-dependent RNA helicase DDX52 [Neodiprion lecontei]	-	-	-	-	-	-	-
miR-142-x	418.947	47.2821	-3.1474	0.0017022	Unigene0076022	458.57	1046.52	1.19039	0.000300843	0.0181895	PebIII	serine/threonine protein kinase [Coptotermes formosanus]	-	-	-	-	-	-	-
miR-142-x	418.947	47.2821	-3.1474	0.0017022	Unigene0076411	1.70873	4.10457	1.2643	1.55565e-05	0.00170797	NHP2	H/ACA ribonucleoprotein complex subunit 2-like protein [Zootermopsis nevadensis]	Genetic Information Processing	Translation	ko03008//Ribosome biogenesis in eukaryotes	K11129	-	-	-
miR-142-y	10.2535	0.724	-3.82398	0.000736816	Unigene0000986	0.001	2.05243	11.0031	1.31878e-06	0.000207502	TRYP6	PREDICTED: trypsin alpha-3 [Apis mellifera]	Environmental Information Processing	Signaling molecules and interaction	ko04080//Neuroactive ligand-receptor interaction	K01312	-	-	-
miR-142-y	10.2535	0.724	-3.82398	0.000736816	Unigene0001268	3.68483	8.4953	1.20507	9.86403e-06	0.00116813	--	histone-lysine n-methyltransferase setmar [Lasius niger]	-	-	-	-	-	-	-
miR-142-y	10.2535	0.724	-3.82398	0.000736816	Unigene0001848	2.1059	4.2861	1.02523	9.82357e-05	0.00761836	osgep	PREDICTED: probable tRNA N6-adenosine threonylcarbamoyltransferase [Anoplophora glabripennis]	-	-	-	-	GO:0044424//intracellular part	GO:0016746//transferase activity, transferring acyl groups;GO:0043169//cation binding	GO:0006400//tRNA modification
miR-142-y	10.2535	0.724	-3.82398	0.000736816	Unigene0003193	5.41677	11.57	1.09489	9.35136e-05	0.0073196	SelD	PREDICTED: LOW QUALITY PROTEIN: selenide, water dikinase [Megachile rotundata]	Metabolism	Metabolism of other amino acids;Global and overview maps	ko01100//Metabolic pathways;ko00450//Selenocompound metabolism	K01008	-	-	-
miR-142-y	10.2535	0.724	-3.82398	0.000736816	Unigene0003266	4.68583	9.4515	1.01224	8.1783e-05	0.00660656	--	myotubularin-related protein 10-b [Lasius niger]	-	-	-	-	-	-	-
miR-142-y	10.2535	0.724	-3.82398	0.000736816	Unigene0003691	3.84043	9.05497	1.23744	1.01013e-06	0.000164166	GRIK2	PREDICTED: glutamate receptor ionotropic, kainate 2 isoform X2 [Tribolium castaneum]	-	-	-	-	GO:0031224//intrinsic component of membrane;GO:0097060//synaptic membrane	GO:0005231//excitatory extracellular ligand-gated ion channel activity	GO:0006811//ion transport;GO:0007215//glutamate receptor signaling pathway
miR-142-y	10.2535	0.724	-3.82398	0.000736816	Unigene0004316	12.5618	38.4676	1.6146	3.15188e-09	9.36508e-07	ARL4C	ADP-ribosylation factor-like protein 4A [Zootermopsis nevadensis]	-	-	-	-	-	-	-
miR-142-y	10.2535	0.724	-3.82398	0.000736816	Unigene0005195	186.44	495.912	1.41138	3.41216e-05	0.00328491	PebIII	ejaculatory bulb-specific protein III [Coptotermes formosanus]	-	-	-	-	-	-	-
miR-142-y	10.2535	0.724	-3.82398	0.000736816	Unigene0005754	0.691533	6.03523	3.12554	5.45128e-14	3.76154e-11	--	cuticular protein analogous to peritrophins 1-D precursor [Tribolium castaneum]	-	-	-	-	-	-	-
miR-142-y	10.2535	0.724	-3.82398	0.000736816	Unigene0007263	5.3711	11.285	1.07111	7.99372e-05	0.00649142	per	Period circadian protein [Zootermopsis nevadensis]	Organismal Systems	Environmental adaptation	ko04711//Circadian rhythm - fly	K02633	-	-	-
miR-142-y	10.2535	0.724	-3.82398	0.000736816	Unigene0008365	4.03787	10.0844	1.32046	2.11896e-07	4.07398e-05	TFAP2B	PREDICTED: transcription factor AP-2-epsilon isoform X2 [Megachile rotundata]	-	-	-	-	GO:0043231//intracellular membrane-bounded organelle	-	GO:0010468//regulation of gene expression
miR-142-y	10.2535	0.724	-3.82398	0.000736816	Unigene0008697	0.568	2.19597	1.95089	5.43617e-08	1.24342e-05	GGPS1	geranylgeranyl diphosphate synthase [Reticulitermes speratus]	Metabolism	Metabolism of terpenoids and polyketides;Global and overview maps	ko01100//Metabolic pathways;ko00900//Terpenoid backbone biosynthesis	K00804	-	-	-
miR-142-y	10.2535	0.724	-3.82398	0.000736816	Unigene0009541	0.584233	5.75893	3.30119	0.000137405	0.00991336	--	PREDICTED: location of vulva defective 1 isoform X1 [Cimex lectularius]	-	-	-	-	-	-	-
miR-142-y	10.2535	0.724	-3.82398	0.000736816	Unigene0010072	12.7435	26.7263	1.06849	3.45115e-05	0.00331726	ZFAND6	PREDICTED: mucin-3A isoform X2 [Acyrthosiphon pisum]	-	-	-	-	-	-	-
miR-142-y	10.2535	0.724	-3.82398	0.000736816	Unigene0011460	4.35247	10.3797	1.25386	3.05522e-06	0.000438288	mex3b	RNA-binding protein MEX3B [Zootermopsis nevadensis]	-	-	-	-	-	-	-
miR-142-y	10.2535	0.724	-3.82398	0.000736816	Unigene0012084	28.6023	80.772	1.49772	6.25142e-09	1.75089e-06	slc36a4	PREDICTED: proton-coupled amino acid transporter 1-like isoform X3 [Halyomorpha halys]	-	-	-	-	-	-	-
miR-142-y	10.2535	0.724	-3.82398	0.000736816	Unigene0012597	10.9679	33.9444	1.62988	5.71166e-06	0.000746535	--	soldier-specific protein-1 [Nasutitermes takasagoensis]	-	-	-	-	-	-	-
miR-142-y	10.2535	0.724	-3.82398	0.000736816	Unigene0013956	0.2329	3.49627	3.90803	2.80967e-13	1.70116e-10	Pxt	PREDICTED: chorion peroxidase [Neodiprion lecontei]	-	-	-	-	-	GO:0003824//catalytic activity;GO:0046906//tetrapyrrole binding	GO:0006950//response to stress;GO:0044710//single-organism metabolic process
miR-142-y	10.2535	0.724	-3.82398	0.000736816	Unigene0032107	0.0651	1.41213	4.43907	1.05389e-06	0.000169936	--	Ejaculatory bulb-specific protein 3 [Zootermopsis nevadensis]	-	-	-	-	-	-	-
miR-142-y	10.2535	0.724	-3.82398	0.000736816	Unigene0040424	1.15277	4.10013	1.83057	3.87973e-06	0.000534826	--	PREDICTED: adhesive plaque matrix protein [Halyomorpha halys]	-	-	-	-	-	-	-
miR-142-y	10.2535	0.724	-3.82398	0.000736816	Unigene0043439	3.3603	8.70217	1.37278	1.19533e-06	0.00019075	ski	Ski oncogene [Zootermopsis nevadensis]	-	-	-	-	-	-	-
miR-142-y	10.2535	0.724	-3.82398	0.000736816	Unigene0043925	0.531833	88.7271	7.38226	7.17453e-06	0.000904306	--	GL24061 [Drosophila persimilis]	-	-	-	-	-	GO:0004672//protein kinase activity	-
miR-142-y	10.2535	0.724	-3.82398	0.000736816	Unigene0045529	0.3205	4.92387	3.9414	2.876e-18	3.77903e-15	--	PREDICTED: mucin-5AC [Bemisia tabaci]	-	-	-	-	-	-	-
miR-142-y	10.2535	0.724	-3.82398	0.000736816	Unigene0046531	0.891467	2.10527	1.23975	0.000559036	0.0293328	--	histone-lysine n-methyltransferase setmar-like protein [Lasius niger]	-	-	-	-	-	-	-
miR-142-y	10.2535	0.724	-3.82398	0.000736816	Unigene0046935	6.00677	15.1777	1.33729	4.17064e-06	0.000569212	Aimp1	Aminoacyl tRNA synthetase complex-interacting multifunctional protein 1 [Zootermopsis nevadensis]	-	-	-	-	-	-	-
miR-142-y	10.2535	0.724	-3.82398	0.000736816	Unigene0047040	1.16037	4.03847	1.79923	2.12034e-10	7.86467e-08	--	reverse transcriptase [Bactrocera tryoni]	-	-	-	-	-	-	-
miR-142-y	10.2535	0.724	-3.82398	0.000736816	Unigene0047597	0.219633	2.49363	3.50508	0.000834776	0.039384	--	ryanodine receptor-like protein [Phlebotomus papatasi]	-	-	-	-	-	-	-
miR-142-y	10.2535	0.724	-3.82398	0.000736816	Unigene0048690	1.5928	5.88413	1.88526	6.21172e-12	3.14443e-09	--	GD10515 [Drosophila simulans]	-	-	-	-	-	-	-
miR-142-y	10.2535	0.724	-3.82398	0.000736816	Unigene0049347	10.2171	25.5257	1.32096	1.2343e-07	2.51576e-05	PSMC4	26S protease regulatory subunit 6B [Zootermopsis nevadensis]	Genetic Information Processing	Folding, sorting and degradation	ko03050//Proteasome	K03063	GO:0044424//intracellular part	GO:0032550//purine ribonucleoside binding;GO:0042623//ATPase activity, coupled	GO:0009057//macromolecule catabolic process;GO:0019538//protein metabolic process
miR-142-y	10.2535	0.724	-3.82398	0.000736816	Unigene0050377	0.2181	13.5864	5.96103	6.72363e-07	0.00011439	--	PREDICTED: serine-rich adhesin for platelets-like [Habropoda laboriosa]	-	-	-	-	-	-	-
miR-142-y	10.2535	0.724	-3.82398	0.000736816	Unigene0051074	8.0671	27.1598	1.75135	7.38522e-09	2.03159e-06	--	Solute carrier family 2, facilitated glucose transporter member 6, partial [Zootermopsis nevadensis]	-	-	-	-	-	-	-
miR-142-y	10.2535	0.724	-3.82398	0.000736816	Unigene0051718	10.9301	28.9282	1.40417	1.10014e-07	2.29534e-05	ITIH4	PREDICTED: inter-alpha-trypsin inhibitor heavy chain H4-like [Halyomorpha halys]	-	-	-	-	-	-	-
miR-142-y	10.2535	0.724	-3.82398	0.000736816	Unigene0051792	0.630433	1.39413	1.14495	9.34777e-05	0.0073196	B0563.6	PREDICTED: probable G-protein coupled receptor B0563.6 [Neodiprion lecontei]	-	-	-	-	-	-	-
miR-142-y	10.2535	0.724	-3.82398	0.000736816	Unigene0052522	1.148	2.9417	1.35753	0.000990625	0.0442841	nrf-6	Nose resistant to fluoxetine protein 6 [Zootermopsis nevadensis]	-	-	-	-	-	-	-
miR-142-y	10.2535	0.724	-3.82398	0.000736816	Unigene0056652	17.4319	39.6782	1.18661	4.24778e-06	0.000577188	SERPINB6	Leukocyte elastase inhibitor C [Zootermopsis nevadensis]	-	-	-	-	-	-	-
miR-142-y	10.2535	0.724	-3.82398	0.000736816	Unigene0058927	0.714333	2.33523	1.7089	2.92769e-05	0.0028906	--	Apolipophorin [Zootermopsis nevadensis]	-	-	-	-	-	-	-
miR-142-y	10.2535	0.724	-3.82398	0.000736816	Unigene0059029	3.70873	9.56397	1.36668	9.36926e-06	0.00112354	--	hypothetical protein [Coptotermes formosanus]	-	-	-	-	-	-	-
miR-142-y	10.2535	0.724	-3.82398	0.000736816	Unigene0059582	0.4167	8.8134	4.40262	1.72048e-08	4.4738e-06	Sb	trypsin-7 [Nilaparvata lugens]	-	-	-	-	-	GO:0004175//endopeptidase activity	GO:0019538//protein metabolic process
miR-142-y	10.2535	0.724	-3.82398	0.000736816	Unigene0062211	6.69353	13.5747	1.02008	3.90898e-05	0.00367721	PIK3AP1	Phosphoinositide 3-kinase adapter protein 1, partial [Zootermopsis nevadensis]	-	-	-	-	-	-	-
miR-142-y	10.2535	0.724	-3.82398	0.000736816	Unigene0062616	1.78627	6.22527	1.80119	0.000199865	0.0132865	--	Chondroitin proteoglycan-2 [Zootermopsis nevadensis]	-	-	-	-	-	GO:0097367//carbohydrate derivative binding	GO:0006022//aminoglycan metabolic process
miR-142-y	10.2535	0.724	-3.82398	0.000736816	Unigene0062877	9.78077	24.7357	1.33858	2.43455e-05	0.00251214	--	seminal fluid protein [Nilaparvata lugens]	-	-	-	-	-	-	-
miR-142-y	10.2535	0.724	-3.82398	0.000736816	Unigene0066235	2.0088	5.167	1.36299	5.9963e-06	0.000778793	--	Noggin-2 [Zootermopsis nevadensis]	Environmental Information Processing	Signal transduction	ko04350//TGF-beta signaling pathway	K04658	-	-	-
miR-142-y	10.2535	0.724	-3.82398	0.000736816	Unigene0067979	0.0844667	5.93193	6.13398	8.54034e-05	0.00682932	--	Pro-resilin [Zootermopsis nevadensis]	-	-	-	-	-	-	-
miR-142-y	10.2535	0.724	-3.82398	0.000736816	Unigene0068296	2.21887	5.25447	1.24372	5.85846e-06	0.000764105	--	hypothetical protein L798_14034 [Zootermopsis nevadensis]	-	-	-	-	-	-	-
miR-142-y	10.2535	0.724	-3.82398	0.000736816	Unigene0069003	13.7435	29.7895	1.11606	9.51374e-06	0.00113755	--	PREDICTED: nucleolin 1 isoform X2 [Neodiprion lecontei]	-	-	-	-	-	-	-
miR-142-y	10.2535	0.724	-3.82398	0.000736816	Unigene0069758	4.47567	9.00657	1.00887	5.07922e-05	0.00451338	abcb6	ATP-binding cassette sub-family B member 6, mitochondrial [Zootermopsis nevadensis]	Environmental Information Processing	Membrane transport	ko02010//ABC transporters	K05661	-	-	-
miR-142-y	10.2535	0.724	-3.82398	0.000736816	Unigene0071775	3.6217	8.29333	1.19529	3.26064e-06	0.000461326	mlec	Malectin-B [Zootermopsis nevadensis]	-	-	-	-	-	-	-
miR-142-y	10.2535	0.724	-3.82398	0.000736816	Unigene0073429	1.56337	3.8765	1.3101	0.000996495	0.0444661	F11	PREDICTED: proclotting enzyme-like [Bemisia tabaci]	-	-	-	-	-	-	-
miR-142-y	10.2535	0.724	-3.82398	0.000736816	Unigene0073996	3.79303	13.8296	1.86633	2.57233e-06	0.000377341	--	PREDICTED: mucin-5AC [Linepithema humile]	-	-	-	-	-	-	-
miR-142-y	10.2535	0.724	-3.82398	0.000736816	Unigene0074499	13.5278	27.3773	1.01705	6.14896e-05	0.00525221	IYD	Iodotyrosine dehalogenase 1, partial [Zootermopsis nevadensis]	-	-	-	-	-	-	-
miR-142-y	10.2535	0.724	-3.82398	0.000736816	Unigene0075099	0.375067	1.11033	1.56577	0.000432056	0.0240819	--	Transposable element Tc3 transposase, partial [Anoplophora glabripennis]	-	-	-	-	-	-	-
miR-142-y	10.2535	0.724	-3.82398	0.000736816	Unigene0075754	2.55733	5.75473	1.17011	2.17987e-05	0.00228756	DDX52	PREDICTED: probable ATP-dependent RNA helicase DDX52 [Neodiprion lecontei]	-	-	-	-	-	-	-
miR-142-y	10.2535	0.724	-3.82398	0.000736816	Unigene0078289	41.5705	83.3943	1.00439	9.00602e-05	0.0071215	RNF31	RING finger protein 31 [Zootermopsis nevadensis]	-	-	-	-	-	-	-
miR-142-y	10.2535	0.724	-3.82398	0.000736816	Unigene0078427	1.59387	4.2131	1.40235	9.09668e-07	0.000149412	RWDD2A	RWD domain-containing protein 2A [Zootermopsis nevadensis]	-	-	-	-	-	-	-
miR-142-y	10.2535	0.724	-3.82398	0.000736816	Unigene0083910	0.0263	4.4639	7.4071	0.000247793	0.0157606	HPN	PREDICTED: trypsin-7-like [Nicrophorus vespilloides]	Environmental Information Processing	Signaling molecules and interaction	ko04080//Neuroactive ligand-receptor interaction	K01312	-	-	-
miR-142-y	10.2535	0.724	-3.82398	0.000736816	Unigene0097223	0.0605667	1.30527	4.42968	1.07762e-05	0.00125856	LYZ	PREDICTED: lysozyme c-1-like [Hyalella azteca]	-	-	-	-	-	-	-
miR-143-y	14.5371	5.59623	-1.37721	0.0194128	Unigene0000359	6.35037	18.9198	1.57499	2.91942e-06	0.000420761	AMBP	PREDICTED: papilin [Crassostrea gigas]	-	-	-	-	-	-	-
miR-143-y	14.5371	5.59623	-1.37721	0.0194128	Unigene0001785	1.41493	3.6649	1.37304	1.20764e-05	0.00138885	--	Mite allergen Lep d 7 [Zootermopsis nevadensis]	-	-	-	-	-	-	-
miR-143-y	14.5371	5.59623	-1.37721	0.0194128	Unigene0004647	1.9383	4.01037	1.04894	0.000118767	0.0088584	iHog	Interference hedgehog [Zootermopsis nevadensis]	Environmental Information Processing	Signal transduction	ko04341//Hedgehog signaling pathway - fly	K20245	-	-	-
miR-143-y	14.5371	5.59623	-1.37721	0.0194128	Unigene0004749	6.82943	14.5877	1.09491	8.03722e-06	0.000993711	dan	Protein distal antenna [Zootermopsis nevadensis]	-	-	-	-	-	-	-
miR-143-y	14.5371	5.59623	-1.37721	0.0194128	Unigene0007263	5.3711	11.285	1.07111	7.99372e-05	0.00649142	per	Period circadian protein [Zootermopsis nevadensis]	Organismal Systems	Environmental adaptation	ko04711//Circadian rhythm - fly	K02633	-	-	-
miR-143-y	14.5371	5.59623	-1.37721	0.0194128	Unigene0008233	1.27913	2.95137	1.20622	6.01322e-05	0.00516497	NLK	nemo-like protein [Nilaparvata lugens]	Environmental Information Processing	Signal transduction	ko04010//MAPK signaling pathway ;ko04310//Wnt signaling pathway ;ko04068//FoxO signaling pathway	K04468	-	GO:0004702//receptor signaling protein serine/threonine kinase activity;GO:0032550//purine ribonucleoside binding	GO:0006464//cellular protein modification process;GO:0006796//phosphate-containing compound metabolic process
miR-143-y	14.5371	5.59623	-1.37721	0.0194128	Unigene0008504	0.2728	5.40907	4.30946	2.21303e-08	5.51094e-06	--	Stress protein DDR48 [Zootermopsis nevadensis]	-	-	-	-	-	-	-
miR-143-y	14.5371	5.59623	-1.37721	0.0194128	Unigene0010072	12.7435	26.7263	1.06849	3.45115e-05	0.00331726	ZFAND6	PREDICTED: mucin-3A isoform X2 [Acyrthosiphon pisum]	-	-	-	-	-	-	-
miR-143-y	14.5371	5.59623	-1.37721	0.0194128	Unigene0010594	0.679033	1.55313	1.19363	0.00037792	0.021782	tll1	Dorsal-ventral patterning tolloid-like protein 1, partial [Zootermopsis nevadensis]	-	-	-	-	-	-	-
miR-143-y	14.5371	5.59623	-1.37721	0.0194128	Unigene0012019	29.8838	62.9231	1.07423	2.72721e-05	0.00273261	msta	Protein msta, isoform B [Zootermopsis nevadensis]	-	-	-	-	-	-	-
miR-143-y	14.5371	5.59623	-1.37721	0.0194128	Unigene0013060	0.001	0.897967	9.81052	0.000981971	0.0440341	--	hypothetical protein, partial [Daphnia magna]	-	-	-	-	-	-	-
miR-143-y	14.5371	5.59623	-1.37721	0.0194128	Unigene0014266	50.8585	119.316	1.23023	3.53325e-07	6.43671e-05	Sam-S	S-adenosylmethionine synthetase [Zootermopsis nevadensis]	Metabolism	Amino acid metabolism;Global and overview maps	ko01100//Metabolic pathways;ko01230//Biosynthesis of amino acids;ko00270//Cysteine and methionine metabolism	K00789	-	-	-
miR-143-y	14.5371	5.59623	-1.37721	0.0194128	Unigene0015824	1.5256	3.11297	1.02891	0.000572294	0.029788	--	Leucine-rich repeat-containing protein [Zootermopsis nevadensis]	-	-	-	-	-	-	-
miR-143-y	14.5371	5.59623	-1.37721	0.0194128	Unigene0025819	0.001	2.122	11.0512	0.000141224	0.010112	--	PREDICTED: loricrin-like isoform X1 [Aedes albopictus]	-	-	-	-	-	-	-
miR-143-y	14.5371	5.59623	-1.37721	0.0194128	Unigene0040109	0.8119	1.666	1.03701	0.000993429	0.0443773	--	Rho GTPase-activating protein 11A [Zootermopsis nevadensis]	-	-	-	-	-	-	-
miR-143-y	14.5371	5.59623	-1.37721	0.0194128	Unigene0043816	0.3842	1.3659	1.82992	3.36112e-05	0.00324335	--	RT08035p, partial [Drosophila melanogaster]	-	-	-	-	-	-	-
miR-143-y	14.5371	5.59623	-1.37721	0.0194128	Unigene0044569	1.65023	4.67903	1.50354	0.000125165	0.00921869	Obp70	chemosensory protein [Blattella germanica]	-	-	-	-	-	-	-
miR-143-y	14.5371	5.59623	-1.37721	0.0194128	Unigene0044752	1.78177	5.26343	1.5627	4.71573e-07	8.3209e-05	vg	vg [Blattella germanica]	-	-	-	-	-	-	-
miR-143-y	14.5371	5.59623	-1.37721	0.0194128	Unigene0046802	0.953433	2.0067	1.07362	0.00013124	0.00956273	ems	PREDICTED: homeotic protein empty spiracles-like [Bemisia tabaci]	-	-	-	-	GO:0043231//intracellular membrane-bounded organelle	GO:0003677//DNA binding	GO:0010468//regulation of gene expression
miR-143-y	14.5371	5.59623	-1.37721	0.0194128	Unigene0047159	5.29713	11.0784	1.06447	4.61442e-05	0.00419081	--	Clarin-3 [Zootermopsis nevadensis]	-	-	-	-	-	-	-
miR-143-y	14.5371	5.59623	-1.37721	0.0194128	Unigene0047332	1.3213	4.8121	1.86471	2.56398e-07	4.79107e-05	far1	Fatty acyl-CoA reductase 2 [Daphnia magna]	Organismal Systems;Cellular Processes	Transport and catabolism;Aging	ko04212//Longevity regulating pathway - worm ;ko04146//Peroxisome	K13356	-	GO:0016620//oxidoreductase activity, acting on the aldehyde or oxo group of donors, NAD or NADP as acceptor	-
miR-143-y	14.5371	5.59623	-1.37721	0.0194128	Unigene0047651	2.2342	4.7313	1.08248	0.000234263	0.0150703	--	hypothetical protein OCBIM_22037956mg, partial [Octopus bimaculoides]	-	-	-	-	-	-	-
miR-143-y	14.5371	5.59623	-1.37721	0.0194128	Unigene0048643	41.8092	99.3696	1.24898	6.15812e-07	0.000105349	Inx3	PREDICTED: innexin inx3 [Papilio polytes]	-	-	-	-	GO:0031224//intrinsic component of membrane	-	GO:0044765//single-organism transport
miR-143-y	14.5371	5.59623	-1.37721	0.0194128	Unigene0050086	3.62173	11.4111	1.65569	5.85909e-10	1.98815e-07	--	BTB/POZ domain-containing protein 2 [Zootermopsis nevadensis]	-	-	-	-	-	-	-
miR-143-y	14.5371	5.59623	-1.37721	0.0194128	Unigene0050422	2.4043	5.72143	1.25076	6.66941e-06	0.000851884	Aats-cys	PREDICTED: cysteine--tRNA ligase, cytoplasmic [Neodiprion lecontei]	Genetic Information Processing	Translation	ko00970//Aminoacyl-tRNA biosynthesis	K01883	-	GO:0004812//aminoacyl-tRNA ligase activity;GO:0032550//purine ribonucleoside binding	GO:0006418//tRNA aminoacylation for protein translation
miR-143-y	14.5371	5.59623	-1.37721	0.0194128	Unigene0051581	0.2836	1.12937	1.99358	7.24011e-06	0.000910654	--	DNA polymerase V [Zootermopsis nevadensis]	-	-	-	-	-	-	-
miR-143-y	14.5371	5.59623	-1.37721	0.0194128	Unigene0051718	10.9301	28.9282	1.40417	1.10014e-07	2.29534e-05	ITIH4	PREDICTED: inter-alpha-trypsin inhibitor heavy chain H4-like [Halyomorpha halys]	-	-	-	-	-	-	-
miR-143-y	14.5371	5.59623	-1.37721	0.0194128	Unigene0052415	3.61913	11.818	1.70727	0.000406798	0.0230802	Gnpda1	PREDICTED: glucosamine-6-phosphate isomerase isoform X2 [Cephus cinctus]	Metabolism	Carbohydrate metabolism;Global and overview maps	ko01100//Metabolic pathways;ko00520//Amino sugar and nucleotide sugar metabolism	K02564	GO:0044424//intracellular part	GO:0003824//catalytic activity	GO:0044238//primary metabolic process;GO:1901071//glucosamine-containing compound metabolic process
miR-143-y	14.5371	5.59623	-1.37721	0.0194128	Unigene0054408	6.33227	14.6165	1.2068	5.54616e-06	0.000727212	ck	Myosin-VIIa [Zootermopsis nevadensis]	-	-	-	-	-	-	-
miR-143-y	14.5371	5.59623	-1.37721	0.0194128	Unigene0055663	0.438067	5.18573	3.56533	0.000956884	0.0433475	--	PREDICTED: zinc finger CCCH domain-containing protein 4-like [Halyomorpha halys]	-	-	-	-	-	-	-
miR-143-y	14.5371	5.59623	-1.37721	0.0194128	Unigene0057029	3.43937	27.5807	3.00344	5.972e-19	8.67802e-16	HPD	4-hydroxyphenylpyruvate dioxygenase [Zootermopsis nevadensis]	Metabolism	Metabolism of cofactors and vitamins;Global and overview maps;Amino acid metabolism	ko01100//Metabolic pathways;ko00350//Tyrosine metabolism ;ko00360//Phenylalanine metabolism ;ko00130//Ubiquinone and other terpenoid-quinone biosynthesis	K00457	-	-	-
miR-143-y	14.5371	5.59623	-1.37721	0.0194128	Unigene0057090	86.0838	230.965	1.42386	1.15711e-07	2.38202e-05	PebIII	Ejaculatory bulb-specific protein 3 [Zootermopsis nevadensis]	-	-	-	-	-	-	-
miR-143-y	14.5371	5.59623	-1.37721	0.0194128	Unigene0060492	2.60483	6.4716	1.31293	2.13466e-06	0.000319591	Nol4l	PREDICTED: nucleolar protein 4-like isoform X3 [Aethina tumida]	-	-	-	-	-	-	-
miR-143-y	14.5371	5.59623	-1.37721	0.0194128	Unigene0062469	51.8015	110.257	1.0898	4.46762e-05	0.00408452	Sesn	Sestrin-like protein [Zootermopsis nevadensis]	-	-	-	-	-	-	GO:1902882//regulation of response to oxidative stress
miR-143-y	14.5371	5.59623	-1.37721	0.0194128	Unigene0064382	13.9801	40.2775	1.5266	2.32694e-09	7.1318e-07	tubb1	beta-tubulin 4 [Nilaparvata lugens]	Cellular Processes	Transport and catabolism	ko04145//Phagosome	K07375	-	-	-
miR-143-y	14.5371	5.59623	-1.37721	0.0194128	Unigene0064477	10.8912	23.8707	1.13208	5.11377e-05	0.0045343	--	hypothetical protein L798_09464 [Zootermopsis nevadensis]	-	-	-	-	-	-	-
miR-143-y	14.5371	5.59623	-1.37721	0.0194128	Unigene0065410	11.3147	23.0624	1.02734	2.70927e-05	0.0027229	CdGAPr	PREDICTED: GTPase-activating protein CdGAPr isoform X1 [Cephus cinctus]	-	-	-	-	-	-	-
miR-143-y	14.5371	5.59623	-1.37721	0.0194128	Unigene0066235	2.0088	5.167	1.36299	5.9963e-06	0.000778793	--	Noggin-2 [Zootermopsis nevadensis]	Environmental Information Processing	Signal transduction	ko04350//TGF-beta signaling pathway	K04658	-	-	-
miR-143-y	14.5371	5.59623	-1.37721	0.0194128	Unigene0066333	0.505933	5.70397	3.49495	0.000363045	0.0211776	nrf-6	Nose resistant to fluoxetine protein 6 [Zootermopsis nevadensis]	-	-	-	-	-	-	-
miR-143-y	14.5371	5.59623	-1.37721	0.0194128	Unigene0067549	4.38553	11.249	1.35897	7.44544e-08	1.63054e-05	KEAP1	Kelch-like ECH-associated protein 1 [Zootermopsis nevadensis]	Genetic Information Processing	Folding, sorting and degradation	ko04120//Ubiquitin mediated proteolysis	K10456	-	-	-
miR-143-y	14.5371	5.59623	-1.37721	0.0194128	Unigene0069361	0.0281333	30.6616	10.0899	2.92265e-05	0.00288793	--	--	-	-	-	-	-	-	-
miR-143-y	14.5371	5.59623	-1.37721	0.0194128	Unigene0069758	4.47567	9.00657	1.00887	5.07922e-05	0.00451338	abcb6	ATP-binding cassette sub-family B member 6, mitochondrial [Zootermopsis nevadensis]	Environmental Information Processing	Membrane transport	ko02010//ABC transporters	K05661	-	-	-
miR-143-y	14.5371	5.59623	-1.37721	0.0194128	Unigene0070119	5.61073	15.4143	1.45801	4.33319e-06	0.000585573	col2a1	PREDICTED: fibril-forming collagen alpha chain-like [Neodiprion lecontei]	Environmental Information Processing	Signaling molecules and interaction	ko04512//ECM-receptor interaction	K19719	-	-	-
miR-143-y	14.5371	5.59623	-1.37721	0.0194128	Unigene0071708	4.7143	10.2846	1.12537	4.77912e-05	0.00429929	--	28S ribosomal protein S23, mitochondrial [Zootermopsis nevadensis]	-	-	-	-	-	-	-
miR-143-y	14.5371	5.59623	-1.37721	0.0194128	Unigene0079894	5.48247	20.0211	1.86863	1.55127e-09	4.9634e-07	CYP6K1	Cytochrome P450 6k1, partial [Zootermopsis nevadensis]	-	-	-	-	-	GO:0005488//binding	-
miR-144-y	32.7378	4.57457	-2.83925	0.00146916	Unigene0000972	3.5954	10.021	1.4788	1.76111e-06	0.000267556	Gyc32E	Guanylate cyclase 32E, partial [Zootermopsis nevadensis]	-	-	-	-	-	-	-
miR-144-y	32.7378	4.57457	-2.83925	0.00146916	Unigene0001123	5.67737	12.3958	1.12656	1.29497e-05	0.00146876	--	endonuclease-reverse transcriptase [Blattella germanica]	-	-	-	-	-	-	-
miR-144-y	32.7378	4.57457	-2.83925	0.00146916	Unigene0001636	2.5542	6.38673	1.32221	1.60163e-07	3.18048e-05	hgh1	Brain protein 16 [Zootermopsis nevadensis]	-	-	-	-	-	-	-
miR-144-y	32.7378	4.57457	-2.83925	0.00146916	Unigene0001848	2.1059	4.2861	1.02523	9.82357e-05	0.00761836	osgep	PREDICTED: probable tRNA N6-adenosine threonylcarbamoyltransferase [Anoplophora glabripennis]	-	-	-	-	GO:0044424//intracellular part	GO:0016746//transferase activity, transferring acyl groups;GO:0043169//cation binding	GO:0006400//tRNA modification
miR-144-y	32.7378	4.57457	-2.83925	0.00146916	Unigene0003250	4.2621	8.88633	1.06002	2.69332e-05	0.00271564	Glra4	PREDICTED: glycine receptor subunit alpha-4 isoform X19 [Cimex lectularius]	-	-	-	-	-	-	-
miR-144-y	32.7378	4.57457	-2.83925	0.00146916	Unigene0004696	3.11633	6.3693	1.03129	8.68489e-05	0.00690737	bwa	Alkaline ceramidase [Zootermopsis nevadensis]	Metabolism	Lipid metabolism;Global and overview maps	ko01100//Metabolic pathways;ko00600//Sphingolipid metabolism	K01441	GO:0031224//intrinsic component of membrane	GO:0016810//hydrolase activity, acting on carbon-nitrogen (but not peptide) bonds	-
miR-144-y	32.7378	4.57457	-2.83925	0.00146916	Unigene0005195	186.44	495.912	1.41138	3.41216e-05	0.00328491	PebIII	ejaculatory bulb-specific protein III [Coptotermes formosanus]	-	-	-	-	-	-	-
miR-144-y	32.7378	4.57457	-2.83925	0.00146916	Unigene0005998	5.99127	12.4726	1.05783	4.59602e-05	0.00417717	Nelf-E	Negative elongation factor E [Zootermopsis nevadensis]	-	-	-	-	-	GO:0008135//translation factor activity, RNA binding	GO:0034645//cellular macromolecule biosynthetic process
miR-144-y	32.7378	4.57457	-2.83925	0.00146916	Unigene0007263	5.3711	11.285	1.07111	7.99372e-05	0.00649142	per	Period circadian protein [Zootermopsis nevadensis]	Organismal Systems	Environmental adaptation	ko04711//Circadian rhythm - fly	K02633	-	-	-
miR-144-y	32.7378	4.57457	-2.83925	0.00146916	Unigene0007952	1.286	3.6533	1.50631	6.21583e-08	1.39591e-05	Fbln7	PREDICTED: fibrillin-3-like isoform X1 [Cephus cinctus]	-	-	-	-	-	-	-
miR-144-y	32.7378	4.57457	-2.83925	0.00146916	Unigene0008233	1.27913	2.95137	1.20622	6.01322e-05	0.00516497	NLK	nemo-like protein [Nilaparvata lugens]	Environmental Information Processing	Signal transduction	ko04010//MAPK signaling pathway ;ko04310//Wnt signaling pathway ;ko04068//FoxO signaling pathway	K04468	-	GO:0004702//receptor signaling protein serine/threonine kinase activity;GO:0032550//purine ribonucleoside binding	GO:0006464//cellular protein modification process;GO:0006796//phosphate-containing compound metabolic process
miR-144-y	32.7378	4.57457	-2.83925	0.00146916	Unigene0008298	4.08483	8.83737	1.11334	3.75518e-05	0.00355964	trmt10c	Mitochondrial ribonuclease P protein 1-like protein [Zootermopsis nevadensis]	-	-	-	-	-	-	-
miR-144-y	32.7378	4.57457	-2.83925	0.00146916	Unigene0008365	4.03787	10.0844	1.32046	2.11896e-07	4.07398e-05	TFAP2B	PREDICTED: transcription factor AP-2-epsilon isoform X2 [Megachile rotundata]	-	-	-	-	GO:0043231//intracellular membrane-bounded organelle	-	GO:0010468//regulation of gene expression
miR-144-y	32.7378	4.57457	-2.83925	0.00146916	Unigene0008794	17.8669	45.042	1.33398	1.5934e-06	0.000246011	--	PREDICTED: paternally-expressed gene 3 protein-like [Hyalella azteca]	-	-	-	-	-	-	-
miR-144-y	32.7378	4.57457	-2.83925	0.00146916	Unigene0009740	3.7077	10.2804	1.4713	1.00425e-06	0.000163426	KLF2	PREDICTED: Krueppel-like factor 9 [Anoplophora glabripennis]	-	-	-	-	-	GO:0043169//cation binding	-
miR-144-y	32.7378	4.57457	-2.83925	0.00146916	Unigene0010072	12.7435	26.7263	1.06849	3.45115e-05	0.00331726	ZFAND6	PREDICTED: mucin-3A isoform X2 [Acyrthosiphon pisum]	-	-	-	-	-	-	-
miR-144-y	32.7378	4.57457	-2.83925	0.00146916	Unigene0011460	4.35247	10.3797	1.25386	3.05522e-06	0.000438288	mex3b	RNA-binding protein MEX3B [Zootermopsis nevadensis]	-	-	-	-	-	-	-
miR-144-y	32.7378	4.57457	-2.83925	0.00146916	Unigene0011775	5.37433	18.1411	1.7551	1.50722e-11	7.24373e-09	--	GM16903 [Drosophila sechellia]	-	-	-	-	-	-	-
miR-144-y	32.7378	4.57457	-2.83925	0.00146916	Unigene0012019	29.8838	62.9231	1.07423	2.72721e-05	0.00273261	msta	Protein msta, isoform B [Zootermopsis nevadensis]	-	-	-	-	-	-	-
miR-144-y	32.7378	4.57457	-2.83925	0.00146916	Unigene0012138	0.994433	3.33987	1.74784	5.00149e-06	0.000663543	--	hypothetical protein L798_09722 [Zootermopsis nevadensis]	-	-	-	-	-	-	-
miR-144-y	32.7378	4.57457	-2.83925	0.00146916	Unigene0012686	7.5242	22.3062	1.56783	2.02109e-06	0.000304432	--	juvenile hormone binding protein domain protein [Coptotermes formosanus]	-	-	-	-	-	-	-
miR-144-y	32.7378	4.57457	-2.83925	0.00146916	Unigene0013587	3.1894	10.5935	1.73182	2.49757e-11	1.12999e-08	--	Peptidyl-prolyl cis-trans isomerase SDCCAG10, partial [Zootermopsis nevadensis]	-	-	-	-	-	-	-
miR-144-y	32.7378	4.57457	-2.83925	0.00146916	Unigene0013597	0.370067	1.08667	1.55405	0.000872241	0.040502	--	DDE superfamily endonuclease [Nuttalliella namaqua]	-	-	-	-	-	-	-
miR-144-y	32.7378	4.57457	-2.83925	0.00146916	Unigene0013971	0.253233	0.915267	1.85372	1.15975e-05	0.00134251	--	hypothetical protein L798_03788 [Zootermopsis nevadensis]	-	-	-	-	-	-	-
miR-144-y	32.7378	4.57457	-2.83925	0.00146916	Unigene0014010	13.8877	36.1098	1.37858	6.63723e-08	1.47711e-05	twk-7	PREDICTED: TWiK family of potassium channels protein 7-like [Dufourea novaeangliae]	-	-	-	-	-	-	-
miR-144-y	32.7378	4.57457	-2.83925	0.00146916	Unigene0014173	0.0899333	2.1223	4.56063	0.000111766	0.00842783	--	Leucine-rich repeat neuronal protein 2 [Zootermopsis nevadensis]	-	-	-	-	-	-	-
miR-144-y	32.7378	4.57457	-2.83925	0.00146916	Unigene0014266	50.8585	119.316	1.23023	3.53325e-07	6.43671e-05	Sam-S	S-adenosylmethionine synthetase [Zootermopsis nevadensis]	Metabolism	Amino acid metabolism;Global and overview maps	ko01100//Metabolic pathways;ko01230//Biosynthesis of amino acids;ko00270//Cysteine and methionine metabolism	K00789	-	-	-
miR-144-y	32.7378	4.57457	-2.83925	0.00146916	Unigene0014324	0.102867	8.4119	6.35358	0.000896586	0.0412907	--	CLUMA_CG000856, isoform A [Clunio marinus]	-	-	-	-	-	-	-
miR-144-y	32.7378	4.57457	-2.83925	0.00146916	Unigene0014554	9.1624	18.3996	1.00588	7.77433e-05	0.00638038	DARS	Aspartyl-tRNA synthetase, cytoplasmic [Zootermopsis nevadensis]	Genetic Information Processing	Translation	ko00970//Aminoacyl-tRNA biosynthesis	K22503	GO:0044424//intracellular part	GO:0004812//aminoacyl-tRNA ligase activity;GO:0032550//purine ribonucleoside binding	GO:0006418//tRNA aminoacylation for protein translation
miR-144-y	32.7378	4.57457	-2.83925	0.00146916	Unigene0015824	1.5256	3.11297	1.02891	0.000572294	0.029788	--	Leucine-rich repeat-containing protein [Zootermopsis nevadensis]	-	-	-	-	-	-	-
miR-144-y	32.7378	4.57457	-2.83925	0.00146916	Unigene0021937	0.787867	1.84887	1.23062	6.53376e-05	0.00551618	--	hypothetical protein L798_02333 [Zootermopsis nevadensis]	-	-	-	-	-	-	-
miR-144-y	32.7378	4.57457	-2.83925	0.00146916	Unigene0040109	0.8119	1.666	1.03701	0.000993429	0.0443773	--	Rho GTPase-activating protein 11A [Zootermopsis nevadensis]	-	-	-	-	-	-	-
miR-144-y	32.7378	4.57457	-2.83925	0.00146916	Unigene0041122	0.438967	32.7162	6.21975	2.34833e-05	0.00243743	--	PREDICTED: protein SEY1-like [Fopius arisanus]	-	-	-	-	-	-	-
miR-144-y	32.7378	4.57457	-2.83925	0.00146916	Unigene0041753	8.35707	16.9103	1.01683	0.000178312	0.0121345	CG4766	Protein mab-21 [Zootermopsis nevadensis]	-	-	-	-	-	-	-
miR-144-y	32.7378	4.57457	-2.83925	0.00146916	Unigene0044789	0.495133	1.64337	1.73077	0.000226697	0.0147216	--	Mite allergen Lep d 7 [Zootermopsis nevadensis]	-	-	-	-	-	-	-
miR-144-y	32.7378	4.57457	-2.83925	0.00146916	Unigene0046265	1.86063	4.96443	1.41584	3.16065e-07	5.818e-05	--	PREDICTED: zinc finger protein 253-like, partial [Octopus bimaculoides]	-	-	-	-	-	-	-
miR-144-y	32.7378	4.57457	-2.83925	0.00146916	Unigene0046640	0.123967	1.5776	3.66971	2.99398e-05	0.0029396	GGH	Gamma-glutamyl hydrolase [Zootermopsis nevadensis]	Metabolism	Metabolism of cofactors and vitamins	ko00790//Folate biosynthesis	K01307	-	-	-
miR-144-y	32.7378	4.57457	-2.83925	0.00146916	Unigene0046825	18.1032	43.5442	1.26623	0.000170324	0.0117594	Spon1	PREDICTED: somatomedin-B and thrombospondin type-1 domain-containing protein [Acyrthosiphon pisum]	-	-	-	-	-	-	-
miR-144-y	32.7378	4.57457	-2.83925	0.00146916	Unigene0047040	1.16037	4.03847	1.79923	2.12034e-10	7.86467e-08	--	reverse transcriptase [Bactrocera tryoni]	-	-	-	-	-	-	-
miR-144-y	32.7378	4.57457	-2.83925	0.00146916	Unigene0047554	0.1097	0.5279	2.2667	0.000174771	0.0119462	--	hypothetical protein L798_11710 [Zootermopsis nevadensis]	-	-	-	-	-	-	-
miR-144-y	32.7378	4.57457	-2.83925	0.00146916	Unigene0048608	5.60423	13.3221	1.24923	2.33006e-06	0.000346327	CG11837	PREDICTED: probable dimethyladenosine transferase [Cephus cinctus]	-	-	-	-	-	GO:0008170//N-methyltransferase activity;GO:0008173//RNA methyltransferase activity	GO:0000154//rRNA modification
miR-144-y	32.7378	4.57457	-2.83925	0.00146916	Unigene0048928	10.3317	26.59	1.3638	1.34202e-07	2.69967e-05	Lrrn4	Insulin-like growth factor-binding protein complex acid labile chain [Zootermopsis nevadensis]	-	-	-	-	-	-	-
miR-144-y	32.7378	4.57457	-2.83925	0.00146916	Unigene0049224	9.4626	69.5989	2.87876	2.84064e-18	3.77271e-15	--	hypothetical protein L798_05444 [Zootermopsis nevadensis]	-	-	-	-	-	-	-
miR-144-y	32.7378	4.57457	-2.83925	0.00146916	Unigene0049767	25.5394	103.758	2.02243	5.40726e-11	2.26399e-08	--	hypothetical protein L798_04498 [Zootermopsis nevadensis]	-	-	-	-	-	-	-
miR-144-y	32.7378	4.57457	-2.83925	0.00146916	Unigene0050086	3.62173	11.4111	1.65569	5.85909e-10	1.98815e-07	--	BTB/POZ domain-containing protein 2 [Zootermopsis nevadensis]	-	-	-	-	-	-	-
miR-144-y	32.7378	4.57457	-2.83925	0.00146916	Unigene0050159	0.911867	1.97053	1.11169	0.000383318	0.0220007	HLHmgamma	Enhancer of split mgamma protein [Zootermopsis nevadensis]	-	-	-	-	-	-	GO:0010467//gene expression;GO:0034645//cellular macromolecule biosynthetic process
miR-144-y	32.7378	4.57457	-2.83925	0.00146916	Unigene0050233	0.0829	7.8928	6.57302	5.46085e-06	0.00071755	Sb	Serine proteinase stubble [Zootermopsis nevadensis]	-	-	-	-	-	-	-
miR-144-y	32.7378	4.57457	-2.83925	0.00146916	Unigene0050357	0.0587	54.6264	9.86202	1.03391e-05	0.00121391	--	Postacrosomal sheath WW domain-binding protein [Melipona quadrifasciata]	-	-	-	-	-	-	-
miR-144-y	32.7378	4.57457	-2.83925	0.00146916	Unigene0050422	2.4043	5.72143	1.25076	6.66941e-06	0.000851884	Aats-cys	PREDICTED: cysteine--tRNA ligase, cytoplasmic [Neodiprion lecontei]	Genetic Information Processing	Translation	ko00970//Aminoacyl-tRNA biosynthesis	K01883	-	GO:0004812//aminoacyl-tRNA ligase activity;GO:0032550//purine ribonucleoside binding	GO:0006418//tRNA aminoacylation for protein translation
miR-144-y	32.7378	4.57457	-2.83925	0.00146916	Unigene0052303	8.92197	21.5162	1.26999	0.000410955	0.0231565	MMEL1	Membrane metallo-endopeptidase-like 1 [Zootermopsis nevadensis]	-	-	-	-	-	GO:0070011//peptidase activity, acting on L-amino acid peptides	GO:0019538//protein metabolic process
miR-144-y	32.7378	4.57457	-2.83925	0.00146916	Unigene0052415	3.61913	11.818	1.70727	0.000406798	0.0230802	Gnpda1	PREDICTED: glucosamine-6-phosphate isomerase isoform X2 [Cephus cinctus]	Metabolism	Carbohydrate metabolism;Global and overview maps	ko01100//Metabolic pathways;ko00520//Amino sugar and nucleotide sugar metabolism	K02564	GO:0044424//intracellular part	GO:0003824//catalytic activity	GO:0044238//primary metabolic process;GO:1901071//glucosamine-containing compound metabolic process
miR-144-y	32.7378	4.57457	-2.83925	0.00146916	Unigene0052432	2.62433	6.2716	1.25688	3.58852e-06	0.000501966	Rrp9	U3 small nucleolar RNA-interacting protein 2 [Zootermopsis nevadensis]	-	-	-	-	-	-	-
miR-144-y	32.7378	4.57457	-2.83925	0.00146916	Unigene0052670	0.79	3.35567	2.08667	1.46775e-07	2.92402e-05	Abhd3	Abhydrolase domain-containing protein 3 [Zootermopsis nevadensis]	-	-	-	-	-	-	-
miR-144-y	32.7378	4.57457	-2.83925	0.00146916	Unigene0053611	5.22413	10.7558	1.04186	6.51059e-05	0.00550274	IPO4	Importin-4, partial [Zootermopsis nevadensis]	-	-	-	-	-	-	-
miR-144-y	32.7378	4.57457	-2.83925	0.00146916	Unigene0053817	7.66773	15.7791	1.04115	6.88206e-05	0.00575998	SPON1	Spondin-1 [Zootermopsis nevadensis]	-	-	-	-	-	-	-
miR-144-y	32.7378	4.57457	-2.83925	0.00146916	Unigene0053858	2.17043	6.27943	1.53265	1.86805e-06	0.000282761	CCND2	PREDICTED: G1/S-specific cyclin-D2 [Neodiprion lecontei]	Environmental Information Processing	Signal transduction	ko04310//Wnt signaling pathway ;ko04068//FoxO signaling pathway	K10151	-	-	-
miR-144-y	32.7378	4.57457	-2.83925	0.00146916	Unigene0054500	28.6996	59.2881	1.04671	1.90856e-05	0.00203396	ADAMTS2	A disintegrin and metalloproteinase with thrombospondin motifs 3 [Zootermopsis nevadensis]	-	-	-	-	-	-	-
miR-144-y	32.7378	4.57457	-2.83925	0.00146916	Unigene0055459	1.01217	9.84203	3.28151	4.42427e-05	0.00405991	KLKB1	seminal fluid protein CSSFP033 [Chilo suppressalis]	-	-	-	-	-	-	-
miR-144-y	32.7378	4.57457	-2.83925	0.00146916	Unigene0056327	1.6315	3.47177	1.08947	6.82871e-05	0.00572995	--	Unhealthy ribosome biogenesis protein 2-like protein [Zootermopsis nevadensis]	-	-	-	-	-	-	-
miR-144-y	32.7378	4.57457	-2.83925	0.00146916	Unigene0056734	16.4333	34.8725	1.08547	8.34645e-06	0.00102448	PSMA1	Proteasome subunit alpha type-1 [Zootermopsis nevadensis]	Genetic Information Processing	Folding, sorting and degradation	ko03050//Proteasome	K02725	-	-	-
miR-144-y	32.7378	4.57457	-2.83925	0.00146916	Unigene0056884	0.1328	37.5151	8.14207	9.82512e-06	0.00116463	--	PREDICTED: keratin, type II cytoskeletal 1-like [Anoplophora glabripennis]	-	-	-	-	-	-	-
miR-144-y	32.7378	4.57457	-2.83925	0.00146916	Unigene0057020	42.3286	89.9525	1.08753	1.28813e-05	0.00146639	--	PREDICTED: ras guanine nucleotide exchange factor P-like [Diaphorina citri]	-	-	-	-	-	-	-
miR-144-y	32.7378	4.57457	-2.83925	0.00146916	Unigene0057363	26.4465	81.4372	1.62261	1.01934e-10	4.02248e-08	--	PREDICTED: glycogenin-1 isoform X2 [Apis cerana]	Metabolism	Carbohydrate metabolism;Global and overview maps	ko01100//Metabolic pathways;ko00500//Starch and sucrose metabolism	K00750	-	-	-
miR-144-y	32.7378	4.57457	-2.83925	0.00146916	Unigene0058927	0.714333	2.33523	1.7089	2.92769e-05	0.0028906	--	Apolipophorin [Zootermopsis nevadensis]	-	-	-	-	-	-	-
miR-144-y	32.7378	4.57457	-2.83925	0.00146916	Unigene0060481	0.658467	6.1772	3.22977	0.000780973	0.0376363	--	AAEL010623-PA [Aedes aegypti]	-	-	-	-	-	-	-
miR-144-y	32.7378	4.57457	-2.83925	0.00146916	Unigene0060733	0.9832	2.32663	1.24269	1.70128e-05	0.00184814	--	NFX1-type zinc finger-containing protein 1 [Zootermopsis nevadensis]	-	-	-	-	-	-	-
miR-144-y	32.7378	4.57457	-2.83925	0.00146916	Unigene0061358	2.30363	6.23277	1.43596	4.58738e-05	0.00417478	--	PREDICTED: protein NDNF [Anoplophora glabripennis]	-	-	-	-	-	-	-
miR-144-y	32.7378	4.57457	-2.83925	0.00146916	Unigene0061594	6.12603	16.8085	1.45616	2.52043e-07	4.71683e-05	--	PREDICTED: anosmin-1 [Anoplophora glabripennis]	-	-	-	-	-	-	-
miR-144-y	32.7378	4.57457	-2.83925	0.00146916	Unigene0062211	6.69353	13.5747	1.02008	3.90898e-05	0.00367721	PIK3AP1	Phosphoinositide 3-kinase adapter protein 1, partial [Zootermopsis nevadensis]	-	-	-	-	-	-	-
miR-144-y	32.7378	4.57457	-2.83925	0.00146916	Unigene0062219	2.9216	29.3234	3.32722	0.000335228	0.0197924	--	LisH domain-containing protein ARMC9 [Zootermopsis nevadensis]	-	-	-	-	-	-	-
miR-144-y	32.7378	4.57457	-2.83925	0.00146916	Unigene0062469	51.8015	110.257	1.0898	4.46762e-05	0.00408452	Sesn	Sestrin-like protein [Zootermopsis nevadensis]	-	-	-	-	-	-	GO:1902882//regulation of response to oxidative stress
miR-144-y	32.7378	4.57457	-2.83925	0.00146916	Unigene0062477	10.239	36.4178	1.83056	4.8805e-11	2.05039e-08	Sox11	Transcription factor Sox-11-A [Zootermopsis nevadensis]	-	-	-	-	-	-	-
miR-144-y	32.7378	4.57457	-2.83925	0.00146916	Unigene0062571	4.6532	16.5872	1.83377	6.68959e-13	3.84309e-10	--	PREDICTED: protein eva-1 isoform X4 [Nicrophorus vespilloides]	-	-	-	-	-	-	-
miR-144-y	32.7378	4.57457	-2.83925	0.00146916	Unigene0062616	1.78627	6.22527	1.80119	0.000199865	0.0132865	--	Chondroitin proteoglycan-2 [Zootermopsis nevadensis]	-	-	-	-	-	GO:0097367//carbohydrate derivative binding	GO:0006022//aminoglycan metabolic process
miR-144-y	32.7378	4.57457	-2.83925	0.00146916	Unigene0062877	9.78077	24.7357	1.33858	2.43455e-05	0.00251214	--	seminal fluid protein [Nilaparvata lugens]	-	-	-	-	-	-	-
miR-144-y	32.7378	4.57457	-2.83925	0.00146916	Unigene0063568	6.65283	13.4464	1.01518	0.000250982	0.0158812	hsf1	Heat shock factor protein [Zootermopsis nevadensis]	Organismal Systems	Aging	ko04212//Longevity regulating pathway - worm	K09414	-	-	-
miR-144-y	32.7378	4.57457	-2.83925	0.00146916	Unigene0064121	0.379367	1.09133	1.52443	0.000260329	0.0163056	CHIC2	PREDICTED: cysteine-rich hydrophobic domain-containing protein 2 [Neodiprion lecontei]	-	-	-	-	-	-	-
miR-144-y	32.7378	4.57457	-2.83925	0.00146916	Unigene0064332	1.78327	3.60613	1.01593	0.000328433	0.019475	foxo	FoxO protein [Blattella germanica]	Organismal Systems;Cellular Processes;Environmental Information Processing	Signal transduction;Transport and catabolism;Aging	ko04212//Longevity regulating pathway - worm ;ko04068//FoxO signaling pathway ;ko04213//Longevity regulating pathway - multiple species ;ko04137//Mitophagy - animal	K09408	-	-	-
miR-144-y	32.7378	4.57457	-2.83925	0.00146916	Unigene0064382	13.9801	40.2775	1.5266	2.32694e-09	7.1318e-07	tubb1	beta-tubulin 4 [Nilaparvata lugens]	Cellular Processes	Transport and catabolism	ko04145//Phagosome	K07375	-	-	-
miR-144-y	32.7378	4.57457	-2.83925	0.00146916	Unigene0065114	2.15203	4.8902	1.18419	0.000106522	0.00809166	Sema5b	Semaphorin-5B [Zootermopsis nevadensis]	-	-	-	-	-	-	-
miR-144-y	32.7378	4.57457	-2.83925	0.00146916	Unigene0065410	11.3147	23.0624	1.02734	2.70927e-05	0.0027229	CdGAPr	PREDICTED: GTPase-activating protein CdGAPr isoform X1 [Cephus cinctus]	-	-	-	-	-	-	-
miR-144-y	32.7378	4.57457	-2.83925	0.00146916	Unigene0066333	0.505933	5.70397	3.49495	0.000363045	0.0211776	nrf-6	Nose resistant to fluoxetine protein 6 [Zootermopsis nevadensis]	-	-	-	-	-	-	-
miR-144-y	32.7378	4.57457	-2.83925	0.00146916	Unigene0067109	16.5921	38.299	1.20681	4.92743e-06	0.000656069	spon1	Spondin-1 [Zootermopsis nevadensis]	-	-	-	-	-	-	-
miR-144-y	32.7378	4.57457	-2.83925	0.00146916	Unigene0067549	4.38553	11.249	1.35897	7.44544e-08	1.63054e-05	KEAP1	Kelch-like ECH-associated protein 1 [Zootermopsis nevadensis]	Genetic Information Processing	Folding, sorting and degradation	ko04120//Ubiquitin mediated proteolysis	K10456	-	-	-
miR-144-y	32.7378	4.57457	-2.83925	0.00146916	Unigene0068296	2.21887	5.25447	1.24372	5.85846e-06	0.000764105	--	hypothetical protein L798_14034 [Zootermopsis nevadensis]	-	-	-	-	-	-	-
miR-144-y	32.7378	4.57457	-2.83925	0.00146916	Unigene0069003	13.7435	29.7895	1.11606	9.51374e-06	0.00113755	--	PREDICTED: nucleolin 1 isoform X2 [Neodiprion lecontei]	-	-	-	-	-	-	-
miR-144-y	32.7378	4.57457	-2.83925	0.00146916	Unigene0069688	2.76497	13.1001	2.24424	5.81448e-14	3.92446e-11	GGPS1	geranylgeranyl diphosphate synthase [Reticulitermes speratus]	Metabolism	Global and overview maps;Metabolism of terpenoids and polyketides	ko01100//Metabolic pathways;ko00900//Terpenoid backbone biosynthesis	K00804	-	GO:0003824//catalytic activity	-
miR-144-y	32.7378	4.57457	-2.83925	0.00146916	Unigene0069724	3.40107	19.0303	2.48424	3.30332e-17	3.93256e-14	r	PREDICTED: CAD protein [Athalia rosae]	Metabolism	Amino acid metabolism;Global and overview maps;Nucleotide metabolism	ko01100//Metabolic pathways;ko00240//Pyrimidine metabolism ;ko00250//Alanine, aspartate and glutamate metabolism	K11540	-	-	-
miR-144-y	32.7378	4.57457	-2.83925	0.00146916	Unigene0069758	4.47567	9.00657	1.00887	5.07922e-05	0.00451338	abcb6	ATP-binding cassette sub-family B member 6, mitochondrial [Zootermopsis nevadensis]	Environmental Information Processing	Membrane transport	ko02010//ABC transporters	K05661	-	-	-
miR-144-y	32.7378	4.57457	-2.83925	0.00146916	Unigene0070119	5.61073	15.4143	1.45801	4.33319e-06	0.000585573	col2a1	PREDICTED: fibril-forming collagen alpha chain-like [Neodiprion lecontei]	Environmental Information Processing	Signaling molecules and interaction	ko04512//ECM-receptor interaction	K19719	-	-	-
miR-144-y	32.7378	4.57457	-2.83925	0.00146916	Unigene0070778	0.366167	53.1106	7.18036	7.26372e-06	0.000911973	--	osiris 19 [Danaus plexippus]	-	-	-	-	-	-	-
miR-144-y	32.7378	4.57457	-2.83925	0.00146916	Unigene0071540	0.284	1.01807	1.84187	1.41729e-05	0.00157851	--	period [Rhyparobia maderae]	Organismal Systems	Environmental adaptation	ko04711//Circadian rhythm - fly	K02633	-	-	GO:0010468//regulation of gene expression;GO:0050794//regulation of cellular process
miR-144-y	32.7378	4.57457	-2.83925	0.00146916	Unigene0071660	1.36	3.33333	1.29336	3.73303e-05	0.00354409	--	IP22107p, partial [Drosophila melanogaster]	-	-	-	-	-	-	-
miR-144-y	32.7378	4.57457	-2.83925	0.00146916	Unigene0073429	1.56337	3.8765	1.3101	0.000996495	0.0444661	F11	PREDICTED: proclotting enzyme-like [Bemisia tabaci]	-	-	-	-	-	-	-
miR-144-y	32.7378	4.57457	-2.83925	0.00146916	Unigene0074012	324.781	1471.75	2.17999	1.69605e-14	1.29313e-11	--	Leucine-rich repeat-containing protein 20 [Zootermopsis nevadensis]	-	-	-	-	-	-	-
miR-144-y	32.7378	4.57457	-2.83925	0.00146916	Unigene0074473	2.13533	4.63633	1.11852	0.000107436	0.00815606	--	hypothetical protein L798_15543 [Zootermopsis nevadensis]	-	-	-	-	-	-	-
miR-144-y	32.7378	4.57457	-2.83925	0.00146916	Unigene0078221	25.8967	55.2942	1.09436	2.66681e-05	0.00269771	SmD3	Small nuclear ribonucleoprotein Sm D3 [Zootermopsis nevadensis]	Genetic Information Processing	Transcription	ko03040//Spliceosome	K11088	-	-	-
miR-144-y	32.7378	4.57457	-2.83925	0.00146916	Unigene0078427	1.59387	4.2131	1.40235	9.09668e-07	0.000149412	RWDD2A	RWD domain-containing protein 2A [Zootermopsis nevadensis]	-	-	-	-	-	-	-
miR-146-x	123.41	9.74213	-3.66308	5.96394e-05	Unigene0000359	6.35037	18.9198	1.57499	2.91942e-06	0.000420761	AMBP	PREDICTED: papilin [Crassostrea gigas]	-	-	-	-	-	-	-
miR-146-x	123.41	9.74213	-3.66308	5.96394e-05	Unigene0001123	5.67737	12.3958	1.12656	1.29497e-05	0.00146876	--	endonuclease-reverse transcriptase [Blattella germanica]	-	-	-	-	-	-	-
miR-146-x	123.41	9.74213	-3.66308	5.96394e-05	Unigene0001785	1.41493	3.6649	1.37304	1.20764e-05	0.00138885	--	Mite allergen Lep d 7 [Zootermopsis nevadensis]	-	-	-	-	-	-	-
miR-146-x	123.41	9.74213	-3.66308	5.96394e-05	Unigene0001848	2.1059	4.2861	1.02523	9.82357e-05	0.00761836	osgep	PREDICTED: probable tRNA N6-adenosine threonylcarbamoyltransferase [Anoplophora glabripennis]	-	-	-	-	GO:0044424//intracellular part	GO:0016746//transferase activity, transferring acyl groups;GO:0043169//cation binding	GO:0006400//tRNA modification
miR-146-x	123.41	9.74213	-3.66308	5.96394e-05	Unigene0002500	8.97507	27.0564	1.59197	5.94896e-08	1.3433e-05	COL9A1	PREDICTED: collagen alpha-1(IX) chain-like isoform X1 [Aethina tumida]	Environmental Information Processing	Signaling molecules and interaction	ko04512//ECM-receptor interaction	K08131	-	-	-
miR-146-x	123.41	9.74213	-3.66308	5.96394e-05	Unigene0002758	2.28233	8.3268	1.86725	1.87977e-09	5.89288e-07	--	Protein CREG1 [Zootermopsis nevadensis]	-	-	-	-	-	-	-
miR-146-x	123.41	9.74213	-3.66308	5.96394e-05	Unigene0003691	3.84043	9.05497	1.23744	1.01013e-06	0.000164166	GRIK2	PREDICTED: glutamate receptor ionotropic, kainate 2 isoform X2 [Tribolium castaneum]	-	-	-	-	GO:0031224//intrinsic component of membrane;GO:0097060//synaptic membrane	GO:0005231//excitatory extracellular ligand-gated ion channel activity	GO:0006811//ion transport;GO:0007215//glutamate receptor signaling pathway
miR-146-x	123.41	9.74213	-3.66308	5.96394e-05	Unigene0004749	6.82943	14.5877	1.09491	8.03722e-06	0.000993711	dan	Protein distal antenna [Zootermopsis nevadensis]	-	-	-	-	-	-	-
miR-146-x	123.41	9.74213	-3.66308	5.96394e-05	Unigene0008233	1.27913	2.95137	1.20622	6.01322e-05	0.00516497	NLK	nemo-like protein [Nilaparvata lugens]	Environmental Information Processing	Signal transduction	ko04010//MAPK signaling pathway ;ko04310//Wnt signaling pathway ;ko04068//FoxO signaling pathway	K04468	-	GO:0004702//receptor signaling protein serine/threonine kinase activity;GO:0032550//purine ribonucleoside binding	GO:0006464//cellular protein modification process;GO:0006796//phosphate-containing compound metabolic process
miR-146-x	123.41	9.74213	-3.66308	5.96394e-05	Unigene0008504	0.2728	5.40907	4.30946	2.21303e-08	5.51094e-06	--	Stress protein DDR48 [Zootermopsis nevadensis]	-	-	-	-	-	-	-
miR-146-x	123.41	9.74213	-3.66308	5.96394e-05	Unigene0010072	12.7435	26.7263	1.06849	3.45115e-05	0.00331726	ZFAND6	PREDICTED: mucin-3A isoform X2 [Acyrthosiphon pisum]	-	-	-	-	-	-	-
miR-146-x	123.41	9.74213	-3.66308	5.96394e-05	Unigene0010457	0.4222	9.2542	4.45411	4.73318e-05	0.00427353	--	Stress protein DDR48 [Zootermopsis nevadensis]	-	-	-	-	-	-	-
miR-146-x	123.41	9.74213	-3.66308	5.96394e-05	Unigene0010941	2.24127	8.09233	1.85224	6.25871e-05	0.00532033	PXDN	PREDICTED: lactoperoxidase [Athalia rosae]	-	-	-	-	-	-	-
miR-146-x	123.41	9.74213	-3.66308	5.96394e-05	Unigene0014010	13.8877	36.1098	1.37858	6.63723e-08	1.47711e-05	twk-7	PREDICTED: TWiK family of potassium channels protein 7-like [Dufourea novaeangliae]	-	-	-	-	-	-	-
miR-146-x	123.41	9.74213	-3.66308	5.96394e-05	Unigene0025819	0.001	2.122	11.0512	0.000141224	0.010112	--	PREDICTED: loricrin-like isoform X1 [Aedes albopictus]	-	-	-	-	-	-	-
miR-146-x	123.41	9.74213	-3.66308	5.96394e-05	Unigene0043925	0.531833	88.7271	7.38226	7.17453e-06	0.000904306	--	GL24061 [Drosophila persimilis]	-	-	-	-	-	GO:0004672//protein kinase activity	-
miR-146-x	123.41	9.74213	-3.66308	5.96394e-05	Unigene0045451	0.108367	11.476	6.72656	4.70773e-05	0.00426302	--	Cuticlin-1 [Zootermopsis nevadensis]	-	-	-	-	-	-	-
miR-146-x	123.41	9.74213	-3.66308	5.96394e-05	Unigene0049397	0.444733	2.93903	2.72433	1.23264e-11	6.01778e-09	B1	carboxylesterase [Oxya chinensis]	Metabolism	Xenobiotics biodegradation and metabolism	ko00983//Drug metabolism - other enzymes	K03927	-	-	-
miR-146-x	123.41	9.74213	-3.66308	5.96394e-05	Unigene0049525	7.60823	33.7861	2.1508	1.08226e-15	1.03624e-12	h	Hairy protein [Periplaneta americana]	-	-	-	-	-	-	-
miR-146-x	123.41	9.74213	-3.66308	5.96394e-05	Unigene0050377	0.2181	13.5864	5.96103	6.72363e-07	0.00011439	--	PREDICTED: serine-rich adhesin for platelets-like [Habropoda laboriosa]	-	-	-	-	-	-	-
miR-146-x	123.41	9.74213	-3.66308	5.96394e-05	Unigene0051597	0.510533	5.1695	3.33995	2.90771e-07	5.40069e-05	mth2	G-protein coupled receptor Mth2 [Zootermopsis nevadensis]	-	-	-	-	-	-	-
miR-146-x	123.41	9.74213	-3.66308	5.96394e-05	Unigene0052670	0.79	3.35567	2.08667	1.46775e-07	2.92402e-05	Abhd3	Abhydrolase domain-containing protein 3 [Zootermopsis nevadensis]	-	-	-	-	-	-	-
miR-146-x	123.41	9.74213	-3.66308	5.96394e-05	Unigene0053164	21.8915	98.5152	2.16997	2.72857e-13	1.66019e-10	--	AAEL004588-PA [Aedes aegypti]	-	-	-	-	-	-	-
miR-146-x	123.41	9.74213	-3.66308	5.96394e-05	Unigene0053166	4.05667	9.00323	1.15015	9.01312e-06	0.00108929	PLA2G3	PREDICTED: phospholipase A2-like [Cephus cinctus]	Metabolism	Global and overview maps;Lipid metabolism	ko01100//Metabolic pathways;ko00564//Glycerophospholipid metabolism ;ko00565//Ether lipid metabolism ;ko00590//Arachidonic acid metabolism ;ko00592//alpha-Linolenic acid metabolism ;ko00591//Linoleic acid metabolism	K01047	-	-	-
miR-146-x	123.41	9.74213	-3.66308	5.96394e-05	Unigene0053533	7.338	15.6737	1.09488	8.26007e-06	0.00101618	BMS1	Ribosome biogenesis protein BMS1-like protein [Zootermopsis nevadensis]	Genetic Information Processing	Translation	ko03008//Ribosome biogenesis in eukaryotes	K14569	-	-	-
miR-146-x	123.41	9.74213	-3.66308	5.96394e-05	Unigene0059721	3.4873	23.7964	2.77056	1.06481e-14	8.43076e-12	--	AGAP002550-PA [Anopheles gambiae str. PEST] [Anopheles gambiae]	-	-	-	-	-	-	-
miR-146-x	123.41	9.74213	-3.66308	5.96394e-05	Unigene0061358	2.30363	6.23277	1.43596	4.58738e-05	0.00417478	--	PREDICTED: protein NDNF [Anoplophora glabripennis]	-	-	-	-	-	-	-
miR-146-x	123.41	9.74213	-3.66308	5.96394e-05	Unigene0062211	6.69353	13.5747	1.02008	3.90898e-05	0.00367721	PIK3AP1	Phosphoinositide 3-kinase adapter protein 1, partial [Zootermopsis nevadensis]	-	-	-	-	-	-	-
miR-146-x	123.41	9.74213	-3.66308	5.96394e-05	Unigene0063254	5.56083	33.7045	2.59957	1.63952e-19	2.53132e-16	--	AGAP011666-PA, partial [Anopheles gambiae str. PEST] [Anopheles gambiae]	-	-	-	-	-	-	-
miR-146-x	123.41	9.74213	-3.66308	5.96394e-05	Unigene0064382	13.9801	40.2775	1.5266	2.32694e-09	7.1318e-07	tubb1	beta-tubulin 4 [Nilaparvata lugens]	Cellular Processes	Transport and catabolism	ko04145//Phagosome	K07375	-	-	-
miR-146-x	123.41	9.74213	-3.66308	5.96394e-05	Unigene0064457	7.99983	20.7579	1.37562	2.43538e-07	4.56458e-05	UGT2B7	UDP-glucuronosyltransferase 2B7, partial [Zootermopsis nevadensis]	Metabolism	Xenobiotics biodegradation and metabolism;Metabolism of cofactors and vitamins;Carbohydrate metabolism;Global and overview maps	ko01100//Metabolic pathways;ko00983//Drug metabolism - other enzymes ;ko00040//Pentose and glucuronate interconversions ;ko00860//Porphyrin and chlorophyll metabolism ;ko00980//Metabolism of xenobiotics by cytochrome P450 ;ko00982//Drug metabolism - cytochrome P450 ;ko00053//Ascorbate and aldarate metabolism ;ko00830//Retinol metabolism	K00699	-	-	-
miR-146-x	123.41	9.74213	-3.66308	5.96394e-05	Unigene0065114	2.15203	4.8902	1.18419	0.000106522	0.00809166	Sema5b	Semaphorin-5B [Zootermopsis nevadensis]	-	-	-	-	-	-	-
miR-146-x	123.41	9.74213	-3.66308	5.96394e-05	Unigene0065410	11.3147	23.0624	1.02734	2.70927e-05	0.0027229	CdGAPr	PREDICTED: GTPase-activating protein CdGAPr isoform X1 [Cephus cinctus]	-	-	-	-	-	-	-
miR-146-x	123.41	9.74213	-3.66308	5.96394e-05	Unigene0066333	0.505933	5.70397	3.49495	0.000363045	0.0211776	nrf-6	Nose resistant to fluoxetine protein 6 [Zootermopsis nevadensis]	-	-	-	-	-	-	-
miR-146-x	123.41	9.74213	-3.66308	5.96394e-05	Unigene0069003	13.7435	29.7895	1.11606	9.51374e-06	0.00113755	--	PREDICTED: nucleolin 1 isoform X2 [Neodiprion lecontei]	-	-	-	-	-	-	-
miR-146-x	123.41	9.74213	-3.66308	5.96394e-05	Unigene0072690	26.3386	74.9158	1.50809	9.87941e-10	3.24536e-07	Tret1	Sugar transporter ERD6-like 4 [Zootermopsis nevadensis]	-	-	-	-	-	-	-
miR-146-x	123.41	9.74213	-3.66308	5.96394e-05	Unigene0073307	217.202	500.149	1.20332	8.35244e-06	0.00102448	l(2)efl	heat shock protein-like protein [Coptotermes formosanus]	Genetic Information Processing;Organismal Systems	Aging;Folding, sorting and degradation	ko04141//Protein processing in endoplasmic reticulum ;ko04213//Longevity regulating pathway - multiple species	K09542	-	-	-
miR-146-x	123.41	9.74213	-3.66308	5.96394e-05	Unigene0076411	1.70873	4.10457	1.2643	1.55565e-05	0.00170797	NHP2	H/ACA ribonucleoprotein complex subunit 2-like protein [Zootermopsis nevadensis]	Genetic Information Processing	Translation	ko03008//Ribosome biogenesis in eukaryotes	K11129	-	-	-
miR-146-x	123.41	9.74213	-3.66308	5.96394e-05	Unigene0120798	0.8247	2.24323	1.44364	7.08251e-06	0.000894475	Shh	Sonic hedgehog protein, partial [Zootermopsis nevadensis]	Environmental Information Processing	Signal transduction	ko04341//Hedgehog signaling pathway - fly	K06224	-	-	-
miR-148-y	39.2066	9.92267	-1.9823	0.0039985	Unigene0000986	0.001	2.05243	11.0031	1.31878e-06	0.000207502	TRYP6	PREDICTED: trypsin alpha-3 [Apis mellifera]	Environmental Information Processing	Signaling molecules and interaction	ko04080//Neuroactive ligand-receptor interaction	K01312	-	-	-
miR-148-y	39.2066	9.92267	-1.9823	0.0039985	Unigene0001076	1.12863	2.56927	1.18678	0.000190851	0.0128184	--	hypothetical protein L798_10476 [Zootermopsis nevadensis]	-	-	-	-	-	-	-
miR-148-y	39.2066	9.92267	-1.9823	0.0039985	Unigene0001123	5.67737	12.3958	1.12656	1.29497e-05	0.00146876	--	endonuclease-reverse transcriptase [Blattella germanica]	-	-	-	-	-	-	-
miR-148-y	39.2066	9.92267	-1.9823	0.0039985	Unigene0001128	0.0681	1.78413	4.71142	0.000486921	0.0264128	--	PREDICTED: slit homolog 2 protein-like isoform X1 [Solenopsis invicta]	-	-	-	-	-	-	-
miR-148-y	39.2066	9.92267	-1.9823	0.0039985	Unigene0001636	2.5542	6.38673	1.32221	1.60163e-07	3.18048e-05	hgh1	Brain protein 16 [Zootermopsis nevadensis]	-	-	-	-	-	-	-
miR-148-y	39.2066	9.92267	-1.9823	0.0039985	Unigene0001848	2.1059	4.2861	1.02523	9.82357e-05	0.00761836	osgep	PREDICTED: probable tRNA N6-adenosine threonylcarbamoyltransferase [Anoplophora glabripennis]	-	-	-	-	GO:0044424//intracellular part	GO:0016746//transferase activity, transferring acyl groups;GO:0043169//cation binding	GO:0006400//tRNA modification
miR-148-y	39.2066	9.92267	-1.9823	0.0039985	Unigene0003266	4.68583	9.4515	1.01224	8.1783e-05	0.00660656	--	myotubularin-related protein 10-b [Lasius niger]	-	-	-	-	-	-	-
miR-148-y	39.2066	9.92267	-1.9823	0.0039985	Unigene0003650	1.2396	5.2796	2.09055	2.38466e-10	8.71424e-08	--	--	-	-	-	-	-	-	-
miR-148-y	39.2066	9.92267	-1.9823	0.0039985	Unigene0004749	6.82943	14.5877	1.09491	8.03722e-06	0.000993711	dan	Protein distal antenna [Zootermopsis nevadensis]	-	-	-	-	-	-	-
miR-148-y	39.2066	9.92267	-1.9823	0.0039985	Unigene0007263	5.3711	11.285	1.07111	7.99372e-05	0.00649142	per	Period circadian protein [Zootermopsis nevadensis]	Organismal Systems	Environmental adaptation	ko04711//Circadian rhythm - fly	K02633	-	-	-
miR-148-y	39.2066	9.92267	-1.9823	0.0039985	Unigene0008794	17.8669	45.042	1.33398	1.5934e-06	0.000246011	--	PREDICTED: paternally-expressed gene 3 protein-like [Hyalella azteca]	-	-	-	-	-	-	-
miR-148-y	39.2066	9.92267	-1.9823	0.0039985	Unigene0008823	0.1934	8.6854	5.48893	5.03089e-05	0.00447534	--	hypothetical protein L798_11378 [Zootermopsis nevadensis]	-	-	-	-	-	-	-
miR-148-y	39.2066	9.92267	-1.9823	0.0039985	Unigene0009740	3.7077	10.2804	1.4713	1.00425e-06	0.000163426	KLF2	PREDICTED: Krueppel-like factor 9 [Anoplophora glabripennis]	-	-	-	-	-	GO:0043169//cation binding	-
miR-148-y	39.2066	9.92267	-1.9823	0.0039985	Unigene0010195	0.559	2.95653	2.40299	0.000261403	0.0163479	--	Filamentous hemagglutinin [Zootermopsis nevadensis]	-	-	-	-	-	-	-
miR-148-y	39.2066	9.92267	-1.9823	0.0039985	Unigene0010594	0.679033	1.55313	1.19363	0.00037792	0.021782	tll1	Dorsal-ventral patterning tolloid-like protein 1, partial [Zootermopsis nevadensis]	-	-	-	-	-	-	-
miR-148-y	39.2066	9.92267	-1.9823	0.0039985	Unigene0011751	1.10223	8.57803	2.96022	8.58792e-08	1.84476e-05	--	PREDICTED: mucin-5AC [Apis florea]	-	-	-	-	-	-	-
miR-148-y	39.2066	9.92267	-1.9823	0.0039985	Unigene0012019	29.8838	62.9231	1.07423	2.72721e-05	0.00273261	msta	Protein msta, isoform B [Zootermopsis nevadensis]	-	-	-	-	-	-	-
miR-148-y	39.2066	9.92267	-1.9823	0.0039985	Unigene0012597	10.9679	33.9444	1.62988	5.71166e-06	0.000746535	--	soldier-specific protein-1 [Nasutitermes takasagoensis]	-	-	-	-	-	-	-
miR-148-y	39.2066	9.92267	-1.9823	0.0039985	Unigene0012644	0.116767	1.30813	3.48581	4.14193e-08	9.75033e-06	--	--	-	-	-	-	-	-	-
miR-148-y	39.2066	9.92267	-1.9823	0.0039985	Unigene0013035	0.214833	0.913067	2.0875	3.04329e-05	0.00298327	--	PiggyBac transposable element-derived protein 4, partial [Stegodyphus mimosarum]	-	-	-	-	-	-	-
miR-148-y	39.2066	9.92267	-1.9823	0.0039985	Unigene0014554	9.1624	18.3996	1.00588	7.77433e-05	0.00638038	DARS	Aspartyl-tRNA synthetase, cytoplasmic [Zootermopsis nevadensis]	Genetic Information Processing	Translation	ko00970//Aminoacyl-tRNA biosynthesis	K22503	GO:0044424//intracellular part	GO:0004812//aminoacyl-tRNA ligase activity;GO:0032550//purine ribonucleoside binding	GO:0006418//tRNA aminoacylation for protein translation
miR-148-y	39.2066	9.92267	-1.9823	0.0039985	Unigene0015824	1.5256	3.11297	1.02891	0.000572294	0.029788	--	Leucine-rich repeat-containing protein [Zootermopsis nevadensis]	-	-	-	-	-	-	-
miR-148-y	39.2066	9.92267	-1.9823	0.0039985	Unigene0035117	0.5986	1.2915	1.10938	0.000833385	0.0393334	CDC7	Cell division cycle 7-related protein kinase [Zootermopsis nevadensis]	-	-	-	-	-	-	-
miR-148-y	39.2066	9.92267	-1.9823	0.0039985	Unigene0039539	0.027	2.6538	6.61896	0.000663844	0.0332501	ACP20	PREDICTED: cuticle protein 19-like [Cimex lectularius]	-	-	-	-	-	-	-
miR-148-y	39.2066	9.92267	-1.9823	0.0039985	Unigene0040109	0.8119	1.666	1.03701	0.000993429	0.0443773	--	Rho GTPase-activating protein 11A [Zootermopsis nevadensis]	-	-	-	-	-	-	-
miR-148-y	39.2066	9.92267	-1.9823	0.0039985	Unigene0040661	1.2922	3.1242	1.27366	0.000465618	0.0254844	LCP17	Endocuticle structural glycoprotein SgAbd-9, partial [Zootermopsis nevadensis]	-	-	-	-	-	-	-
miR-148-y	39.2066	9.92267	-1.9823	0.0039985	Unigene0041390	3.8005	12.6658	1.73668	1.70378e-09	5.39597e-07	--	Myc protein [Zootermopsis nevadensis]	Environmental Information Processing	Signal transduction	ko04010//MAPK signaling pathway ;ko04310//Wnt signaling pathway ;ko04391//Hippo signaling pathway -fly ;ko04350//TGF-beta signaling pathway ;ko04012//ErbB signaling pathway	K04377	-	-	-
miR-148-y	39.2066	9.92267	-1.9823	0.0039985	Unigene0043439	3.3603	8.70217	1.37278	1.19533e-06	0.00019075	ski	Ski oncogene [Zootermopsis nevadensis]	-	-	-	-	-	-	-
miR-148-y	39.2066	9.92267	-1.9823	0.0039985	Unigene0043488	3.4484	11.8447	1.78024	2.64283e-08	6.45116e-06	HSDL1	PREDICTED: inactive hydroxysteroid dehydrogenase-like protein 1 [Bemisia tabaci]	-	-	-	-	-	GO:0003824//catalytic activity	GO:0044710//single-organism metabolic process
miR-148-y	39.2066	9.92267	-1.9823	0.0039985	Unigene0043816	0.3842	1.3659	1.82992	3.36112e-05	0.00324335	--	RT08035p, partial [Drosophila melanogaster]	-	-	-	-	-	-	-
miR-148-y	39.2066	9.92267	-1.9823	0.0039985	Unigene0045451	0.108367	11.476	6.72656	4.70773e-05	0.00426302	--	Cuticlin-1 [Zootermopsis nevadensis]	-	-	-	-	-	-	-
miR-148-y	39.2066	9.92267	-1.9823	0.0039985	Unigene0045913	0.785967	2.694	1.77721	1.63887e-06	0.000250837	MEOX2	PREDICTED: homeobox protein MOX-2 [Tribolium castaneum]	-	-	-	-	-	-	-
miR-148-y	39.2066	9.92267	-1.9823	0.0039985	Unigene0046264	4.06833	9.17387	1.17309	1.55333e-05	0.00170797	RMND1	Required for meiotic nuclear division protein 1-like protein [Zootermopsis nevadensis]	-	-	-	-	-	-	-
miR-148-y	39.2066	9.92267	-1.9823	0.0039985	Unigene0047040	1.16037	4.03847	1.79923	2.12034e-10	7.86467e-08	--	reverse transcriptase [Bactrocera tryoni]	-	-	-	-	-	-	-
miR-148-y	39.2066	9.92267	-1.9823	0.0039985	Unigene0047651	2.2342	4.7313	1.08248	0.000234263	0.0150703	--	hypothetical protein OCBIM_22037956mg, partial [Octopus bimaculoides]	-	-	-	-	-	-	-
miR-148-y	39.2066	9.92267	-1.9823	0.0039985	Unigene0048029	116.992	279.159	1.25468	8.58964e-07	0.000141649	--	Parcxpwnx03 [Periplaneta americana]	-	-	-	-	-	-	-
miR-148-y	39.2066	9.92267	-1.9823	0.0039985	Unigene0048690	1.5928	5.88413	1.88526	6.21172e-12	3.14443e-09	--	GD10515 [Drosophila simulans]	-	-	-	-	-	-	-
miR-148-y	39.2066	9.92267	-1.9823	0.0039985	Unigene0048928	10.3317	26.59	1.3638	1.34202e-07	2.69967e-05	Lrrn4	Insulin-like growth factor-binding protein complex acid labile chain [Zootermopsis nevadensis]	-	-	-	-	-	-	-
miR-148-y	39.2066	9.92267	-1.9823	0.0039985	Unigene0049515	3.5774	11.7483	1.71547	2.72112e-06	0.000394019	YPEL1	PREDICTED: protein yippee-like 2 [Bemisia tabaci]	-	-	-	-	-	-	-
miR-148-y	39.2066	9.92267	-1.9823	0.0039985	Unigene0049556	10.5948	22.3461	1.07666	2.43317e-05	0.00251214	Hars	Histidyl-tRNA synthetase, cytoplasmic [Zootermopsis nevadensis]	Genetic Information Processing	Translation	ko00970//Aminoacyl-tRNA biosynthesis	K01892	-	-	-
miR-148-y	39.2066	9.92267	-1.9823	0.0039985	Unigene0049615	7.00513	14.7307	1.07234	5.71811e-05	0.00496229	ABCE1	ATP-binding cassette sub-family E member 1 [Zootermopsis nevadensis]	-	-	-	-	-	GO:0005488//binding;GO:0017111//nucleoside-triphosphatase activity	GO:0044765//single-organism transport
miR-148-y	39.2066	9.92267	-1.9823	0.0039985	Unigene0049683	41.6646	86.0417	1.04622	1.79741e-05	0.00193723	ier5l	Immediate early response gene 5-like protein [Zootermopsis nevadensis]	-	-	-	-	-	-	-
miR-148-y	39.2066	9.92267	-1.9823	0.0039985	Unigene0049767	25.5394	103.758	2.02243	5.40726e-11	2.26399e-08	--	hypothetical protein L798_04498 [Zootermopsis nevadensis]	-	-	-	-	-	-	-
miR-148-y	39.2066	9.92267	-1.9823	0.0039985	Unigene0050159	0.911867	1.97053	1.11169	0.000383318	0.0220007	HLHmgamma	Enhancer of split mgamma protein [Zootermopsis nevadensis]	-	-	-	-	-	-	GO:0010467//gene expression;GO:0034645//cellular macromolecule biosynthetic process
miR-148-y	39.2066	9.92267	-1.9823	0.0039985	Unigene0050437	13.0072	42.7001	1.71492	3.617e-11	1.5842e-08	--	P-selectin [Zootermopsis nevadensis]	-	-	-	-	-	-	-
miR-148-y	39.2066	9.92267	-1.9823	0.0039985	Unigene0050825	1.92777	4.17357	1.11435	0.000189688	0.012761	Mcm6	DNA replication licensing factor Mcm6 [Zootermopsis nevadensis]	Genetic Information Processing	Replication and repair	ko03030//DNA replication	K02542	GO:0043231//intracellular membrane-bounded organelle;GO:0043234//protein complex	GO:0003676//nucleic acid binding;GO:0004386//helicase activity;GO:0032550//purine ribonucleoside binding	GO:0006259//DNA metabolic process;GO:0032392//DNA geometric change
miR-148-y	39.2066	9.92267	-1.9823	0.0039985	Unigene0051138	0.993567	2.36393	1.2505	1.00271e-05	0.00118614	p	PREDICTED: Hermansky-Pudlak syndrome 5 protein homolog [Ceratina calcarata]	-	-	-	-	-	-	-
miR-148-y	39.2066	9.92267	-1.9823	0.0039985	Unigene0051583	4.65023	10.2546	1.14089	8.57601e-06	0.00104464	mybbp1a	DNA polymerase V [Zootermopsis nevadensis]	-	-	-	-	-	-	-
miR-148-y	39.2066	9.92267	-1.9823	0.0039985	Unigene0051732	1.41313	5.40687	1.9359	0.00115745	0.0498576	--	hypothetical protein L798_00817 [Zootermopsis nevadensis]	-	-	-	-	-	-	-
miR-148-y	39.2066	9.92267	-1.9823	0.0039985	Unigene0051736	4.77793	22.4584	2.2328	9.44148e-15	7.62199e-12	hes4-a	Transcription factor HES-4-A [Zootermopsis nevadensis]	-	-	-	-	-	-	-
miR-148-y	39.2066	9.92267	-1.9823	0.0039985	Unigene0051792	0.630433	1.39413	1.14495	9.34777e-05	0.0073196	B0563.6	PREDICTED: probable G-protein coupled receptor B0563.6 [Neodiprion lecontei]	-	-	-	-	-	-	-
miR-148-y	39.2066	9.92267	-1.9823	0.0039985	Unigene0052303	8.92197	21.5162	1.26999	0.000410955	0.0231565	MMEL1	Membrane metallo-endopeptidase-like 1 [Zootermopsis nevadensis]	-	-	-	-	-	GO:0070011//peptidase activity, acting on L-amino acid peptides	GO:0019538//protein metabolic process
miR-148-y	39.2066	9.92267	-1.9823	0.0039985	Unigene0052522	1.148	2.9417	1.35753	0.000990625	0.0442841	nrf-6	Nose resistant to fluoxetine protein 6 [Zootermopsis nevadensis]	-	-	-	-	-	-	-
miR-148-y	39.2066	9.92267	-1.9823	0.0039985	Unigene0053437	44.0491	104.024	1.23973	1.29392e-06	0.000204906	Klf11	Krueppel-like factor 10 [Zootermopsis nevadensis]	-	-	-	-	-	-	-
miR-148-y	39.2066	9.92267	-1.9823	0.0039985	Unigene0053533	7.338	15.6737	1.09488	8.26007e-06	0.00101618	BMS1	Ribosome biogenesis protein BMS1-like protein [Zootermopsis nevadensis]	Genetic Information Processing	Translation	ko03008//Ribosome biogenesis in eukaryotes	K14569	-	-	-
miR-148-y	39.2066	9.92267	-1.9823	0.0039985	Unigene0055053	1.72343	10.7253	2.63767	3.18473e-22	6.7821e-19	amdhd1	PREDICTED: probable imidazolonepropionase [Parasteatoda tepidariorum]	Metabolism	Global and overview maps;Amino acid metabolism	ko01100//Metabolic pathways;ko00340//Histidine metabolism	K01468	-	-	-
miR-148-y	39.2066	9.92267	-1.9823	0.0039985	Unigene0055471	9.76947	21.0043	1.10433	4.37199e-05	0.00402089	PDPK1	3-phosphoinositide-dependent protein kinase 1 [Zootermopsis nevadensis]	Cellular Processes;Environmental Information Processing	Signal transduction;Transport and catabolism	ko04140//Autophagy - animal ;ko04150//mTOR signaling pathway ;ko04068//FoxO signaling pathway	K06276	-	GO:0004672//protein kinase activity	-
miR-148-y	39.2066	9.92267	-1.9823	0.0039985	Unigene0055978	17.6549	53.807	1.60772	2.01007e-10	7.52343e-08	--	PREDICTED: ankyrin repeat and SOCS box protein 14-like [Bemisia tabaci]	-	-	-	-	-	-	-
miR-148-y	39.2066	9.92267	-1.9823	0.0039985	Unigene0057020	42.3286	89.9525	1.08753	1.28813e-05	0.00146639	--	PREDICTED: ras guanine nucleotide exchange factor P-like [Diaphorina citri]	-	-	-	-	-	-	-
miR-148-y	39.2066	9.92267	-1.9823	0.0039985	Unigene0057775	6.43987	14.5438	1.1753	5.83967e-06	0.00076246	--	PREDICTED: storkhead-box protein 2 isoform X2 [Megachile rotundata]	-	-	-	-	-	-	-
miR-148-y	39.2066	9.92267	-1.9823	0.0039985	Unigene0058927	0.714333	2.33523	1.7089	2.92769e-05	0.0028906	--	Apolipophorin [Zootermopsis nevadensis]	-	-	-	-	-	-	-
miR-148-y	39.2066	9.92267	-1.9823	0.0039985	Unigene0059029	3.70873	9.56397	1.36668	9.36926e-06	0.00112354	--	hypothetical protein [Coptotermes formosanus]	-	-	-	-	-	-	-
miR-148-y	39.2066	9.92267	-1.9823	0.0039985	Unigene0062015	3.93237	8.3073	1.07898	2.52182e-05	0.00257636	Rsl1d1	Ribosomal L1 domain-containing protein 1 [Zootermopsis nevadensis]	-	-	-	-	-	-	-
miR-148-y	39.2066	9.92267	-1.9823	0.0039985	Unigene0062139	0.0251333	3.13707	6.96367	8.1513e-05	0.00658905	--	Beadex/dlmo protein [Daphnia magna]	-	-	-	-	-	-	-
miR-148-y	39.2066	9.92267	-1.9823	0.0039985	Unigene0062469	51.8015	110.257	1.0898	4.46762e-05	0.00408452	Sesn	Sestrin-like protein [Zootermopsis nevadensis]	-	-	-	-	-	-	GO:1902882//regulation of response to oxidative stress
miR-148-y	39.2066	9.92267	-1.9823	0.0039985	Unigene0062877	9.78077	24.7357	1.33858	2.43455e-05	0.00251214	--	seminal fluid protein [Nilaparvata lugens]	-	-	-	-	-	-	-
miR-148-y	39.2066	9.92267	-1.9823	0.0039985	Unigene0065410	11.3147	23.0624	1.02734	2.70927e-05	0.0027229	CdGAPr	PREDICTED: GTPase-activating protein CdGAPr isoform X1 [Cephus cinctus]	-	-	-	-	-	-	-
miR-148-y	39.2066	9.92267	-1.9823	0.0039985	Unigene0065755	7.45583	17.3465	1.2182	2.34398e-05	0.00243496	AAEL000263	PREDICTED: zinc finger protein jing [Cerapachys biroi]	-	-	-	-	-	-	-
miR-148-y	39.2066	9.92267	-1.9823	0.0039985	Unigene0066235	2.0088	5.167	1.36299	5.9963e-06	0.000778793	--	Noggin-2 [Zootermopsis nevadensis]	Environmental Information Processing	Signal transduction	ko04350//TGF-beta signaling pathway	K04658	-	-	-
miR-148-y	39.2066	9.92267	-1.9823	0.0039985	Unigene0066333	0.505933	5.70397	3.49495	0.000363045	0.0211776	nrf-6	Nose resistant to fluoxetine protein 6 [Zootermopsis nevadensis]	-	-	-	-	-	-	-
miR-148-y	39.2066	9.92267	-1.9823	0.0039985	Unigene0066418	7.1687	16.7756	1.22658	1.42947e-06	0.00022293	Mical	PREDICTED: protein-methionine sulfoxide oxidase Mical isoform X10 [Cephus cinctus]	-	-	-	-	-	-	-
miR-148-y	39.2066	9.92267	-1.9823	0.0039985	Unigene0067549	4.38553	11.249	1.35897	7.44544e-08	1.63054e-05	KEAP1	Kelch-like ECH-associated protein 1 [Zootermopsis nevadensis]	Genetic Information Processing	Folding, sorting and degradation	ko04120//Ubiquitin mediated proteolysis	K10456	-	-	-
miR-148-y	39.2066	9.92267	-1.9823	0.0039985	Unigene0069003	13.7435	29.7895	1.11606	9.51374e-06	0.00113755	--	PREDICTED: nucleolin 1 isoform X2 [Neodiprion lecontei]	-	-	-	-	-	-	-
miR-148-y	39.2066	9.92267	-1.9823	0.0039985	Unigene0070009	1.98873	4.4343	1.15686	2.97923e-05	0.00292952	SUCLG2	Succinyl-CoA ligase [GDP-forming] subunit beta, mitochondrial [Zootermopsis nevadensis]	Metabolism	Global and overview maps;Carbohydrate metabolism	ko01100//Metabolic pathways;ko01200//Carbon metabolism;ko00020//Citrate cycle (TCA cycle) ;ko00640//Propanoate metabolism	K01900	-	-	-
miR-148-y	39.2066	9.92267	-1.9823	0.0039985	Unigene0070982	4.05897	10.3508	1.35056	3.45759e-07	6.31753e-05	RECK	Reversion-inducing cysteine-rich protein with Kazal motifs, partial [Zootermopsis nevadensis]	-	-	-	-	-	-	-
miR-148-y	39.2066	9.92267	-1.9823	0.0039985	Unigene0071775	3.6217	8.29333	1.19529	3.26064e-06	0.000461326	mlec	Malectin-B [Zootermopsis nevadensis]	-	-	-	-	-	-	-
miR-148-y	39.2066	9.92267	-1.9823	0.0039985	Unigene0072081	1.0436	3.0214	1.53365	0.000536789	0.0283947	--	hypothetical protein L798_02999 [Zootermopsis nevadensis]	-	-	-	-	-	-	-
miR-148-y	39.2066	9.92267	-1.9823	0.0039985	Unigene0076182	48.9193	104.611	1.09656	3.4155e-05	0.00328555	Tret1	Solute carrier family 2, facilitated glucose transporter member 8 [Zootermopsis nevadensis]	-	-	-	-	GO:0016020//membrane	GO:0022857//transmembrane transporter activity	GO:0044765//single-organism transport
miR-148-y	39.2066	9.92267	-1.9823	0.0039985	Unigene0078427	1.59387	4.2131	1.40235	9.09668e-07	0.000149412	RWDD2A	RWD domain-containing protein 2A [Zootermopsis nevadensis]	-	-	-	-	-	-	-
miR-148-y	39.2066	9.92267	-1.9823	0.0039985	Unigene0086759	0.0202333	0.649333	5.00415	9.71193e-05	0.00753972	--	Cuticular protein analogous to peritrophins 1-D [Daphnia magna]	-	-	-	-	-	-	-
miR-148-y	39.2066	9.92267	-1.9823	0.0039985	Unigene0111691	1.73673	3.8207	1.13746	0.000604866	0.0311681	GRP	gram negative bacteria binding protein 1 [Nasutitermes exitiosus]	-	-	-	-	-	-	-
miR-150-x	98.4107	10.015	-3.29666	0.000895003	Unigene0001082	5.81447	12.1796	1.06675	6.04212e-05	0.00518619	Usp45	Ubiquitin carboxyl-terminal hydrolase 16, partial [Zootermopsis nevadensis]	-	-	-	-	-	-	-
miR-150-x	98.4107	10.015	-3.29666	0.000895003	Unigene0001848	2.1059	4.2861	1.02523	9.82357e-05	0.00761836	osgep	PREDICTED: probable tRNA N6-adenosine threonylcarbamoyltransferase [Anoplophora glabripennis]	-	-	-	-	GO:0044424//intracellular part	GO:0016746//transferase activity, transferring acyl groups;GO:0043169//cation binding	GO:0006400//tRNA modification
miR-150-x	98.4107	10.015	-3.29666	0.000895003	Unigene0003250	4.2621	8.88633	1.06002	2.69332e-05	0.00271564	Glra4	PREDICTED: glycine receptor subunit alpha-4 isoform X19 [Cimex lectularius]	-	-	-	-	-	-	-
miR-150-x	98.4107	10.015	-3.29666	0.000895003	Unigene0004696	3.11633	6.3693	1.03129	8.68489e-05	0.00690737	bwa	Alkaline ceramidase [Zootermopsis nevadensis]	Metabolism	Lipid metabolism;Global and overview maps	ko01100//Metabolic pathways;ko00600//Sphingolipid metabolism	K01441	GO:0031224//intrinsic component of membrane	GO:0016810//hydrolase activity, acting on carbon-nitrogen (but not peptide) bonds	-
miR-150-x	98.4107	10.015	-3.29666	0.000895003	Unigene0004792	56.0035	191.945	1.77711	1.27667e-12	7.24518e-10	FAM184A	Protein FAM184A, partial [Exaiptasia pallida]	-	-	-	-	-	-	-
miR-150-x	98.4107	10.015	-3.29666	0.000895003	Unigene0007992	11.0492	22.5135	1.02685	2.70308e-05	0.00272104	eRF1	Eukaryotic peptide chain release factor subunit 1 [Zootermopsis nevadensis]	Genetic Information Processing	Translation	ko03015//mRNA surveillance pathway	K03265	-	GO:0003747//translation release factor activity	GO:0043624//cellular protein complex disassembly
miR-150-x	98.4107	10.015	-3.29666	0.000895003	Unigene0011241	4.48763	11.9419	1.41201	5.97569e-07	0.000102845	Slc16a10	Monocarboxylate transporter 10, partial [Zootermopsis nevadensis]	-	-	-	-	-	-	-
miR-150-x	98.4107	10.015	-3.29666	0.000895003	Unigene0041122	0.438967	32.7162	6.21975	2.34833e-05	0.00243743	--	PREDICTED: protein SEY1-like [Fopius arisanus]	-	-	-	-	-	-	-
miR-150-x	98.4107	10.015	-3.29666	0.000895003	Unigene0041786	0.428267	1.63833	1.93565	1.226e-08	3.24956e-06	--	hypothetical protein L798_06094 [Zootermopsis nevadensis]	-	-	-	-	-	-	-
miR-150-x	98.4107	10.015	-3.29666	0.000895003	Unigene0042703	0.461067	1.45577	1.65873	1.39493e-05	0.00155641	--	PREDICTED: selenoprotein H [Crassostrea gigas]	-	-	-	-	-	-	-
miR-150-x	98.4107	10.015	-3.29666	0.000895003	Unigene0044569	1.65023	4.67903	1.50354	0.000125165	0.00921869	Obp70	chemosensory protein [Blattella germanica]	-	-	-	-	-	-	-
miR-150-x	98.4107	10.015	-3.29666	0.000895003	Unigene0045389	0.001	1.34443	10.3928	0.000853362	0.0398908	--	carbohydrate binding module, partial [Coptotermes formosanus]	-	-	-	-	-	-	-
miR-150-x	98.4107	10.015	-3.29666	0.000895003	Unigene0049612	6.97003	39.4536	2.50092	8.99204e-18	1.12187e-14	--	Transcriptional regulator ICP4 domain-containing protein [Daphnia magna]	-	-	-	-	-	-	-
miR-150-x	98.4107	10.015	-3.29666	0.000895003	Unigene0051479	0.001	1.48147	10.5328	0.000193936	0.0129762	ain1	alpha actinin, partial [Coptotermes formosanus]	-	-	-	-	-	-	-
miR-150-x	98.4107	10.015	-3.29666	0.000895003	Unigene0053858	2.17043	6.27943	1.53265	1.86805e-06	0.000282761	CCND2	PREDICTED: G1/S-specific cyclin-D2 [Neodiprion lecontei]	Environmental Information Processing	Signal transduction	ko04310//Wnt signaling pathway ;ko04068//FoxO signaling pathway	K10151	-	-	-
miR-150-x	98.4107	10.015	-3.29666	0.000895003	Unigene0054032	1.43597	2.9589	1.04304	0.000295876	0.0179937	--	RNA exonuclease 1-like protein [Zootermopsis nevadensis]	Genetic Information Processing	Translation	ko03008//Ribosome biogenesis in eukaryotes	K14570	-	-	-
miR-150-x	98.4107	10.015	-3.29666	0.000895003	Unigene0055492	4.47857	9.64333	1.10649	1.36947e-05	0.00153634	MDN1	Midasin [Zootermopsis nevadensis]	Genetic Information Processing	Translation	ko03008//Ribosome biogenesis in eukaryotes	K14572	-	-	-
miR-150-x	98.4107	10.015	-3.29666	0.000895003	Unigene0055978	17.6549	53.807	1.60772	2.01007e-10	7.52343e-08	--	PREDICTED: ankyrin repeat and SOCS box protein 14-like [Bemisia tabaci]	-	-	-	-	-	-	-
miR-150-x	98.4107	10.015	-3.29666	0.000895003	Unigene0057030	0.403033	1.2617	1.6464	0.000163521	0.0113852	HPD	PREDICTED: 4-hydroxyphenylpyruvate dioxygenase [Cimex lectularius]	Metabolism	Metabolism of cofactors and vitamins;Amino acid metabolism;Global and overview maps	ko01100//Metabolic pathways;ko00350//Tyrosine metabolism ;ko00360//Phenylalanine metabolism ;ko00130//Ubiquinone and other terpenoid-quinone biosynthesis	K00457	-	GO:0016491//oxidoreductase activity;GO:0043169//cation binding	GO:0006520//cellular amino acid metabolic process
miR-150-x	98.4107	10.015	-3.29666	0.000895003	Unigene0059394	1.2559	3.99853	1.67075	8.86593e-06	0.00107466	Crisp2	Cysteine-rich secretory protein 2 [Zootermopsis nevadensis]	-	-	-	-	-	-	-
miR-150-x	98.4107	10.015	-3.29666	0.000895003	Unigene0062469	51.8015	110.257	1.0898	4.46762e-05	0.00408452	Sesn	Sestrin-like protein [Zootermopsis nevadensis]	-	-	-	-	-	-	GO:1902882//regulation of response to oxidative stress
miR-150-x	98.4107	10.015	-3.29666	0.000895003	Unigene0064477	10.8912	23.8707	1.13208	5.11377e-05	0.0045343	--	hypothetical protein L798_09464 [Zootermopsis nevadensis]	-	-	-	-	-	-	-
miR-150-x	98.4107	10.015	-3.29666	0.000895003	Unigene0065410	11.3147	23.0624	1.02734	2.70927e-05	0.0027229	CdGAPr	PREDICTED: GTPase-activating protein CdGAPr isoform X1 [Cephus cinctus]	-	-	-	-	-	-	-
miR-150-x	98.4107	10.015	-3.29666	0.000895003	Unigene0069934	1.1028	2.4727	1.16492	0.000197087	0.0131514	--	hypothetical protein L798_15697 [Zootermopsis nevadensis]	Metabolism	Nucleotide metabolism;Global and overview maps	ko01100//Metabolic pathways;ko00230//Purine metabolism	K01490	-	-	-
miR-150-x	98.4107	10.015	-3.29666	0.000895003	Unigene0076531	3.02857	26.7106	3.1407	1.98715e-07	3.84104e-05	Cyp6a13	Cytochrome P450 6k1 [Zootermopsis nevadensis]	-	-	-	-	-	-	-
miR-150-y	0.7567	0.01	-6.24165	0.0168191	Unigene0000041	0.0616667	10.8153	7.45437	2.26916e-05	0.00236519	--	osiris 16-like protein [Lasius niger]	-	-	-	-	-	-	-
miR-150-y	0.7567	0.01	-6.24165	0.0168191	Unigene0000380	0.402833	1.90827	2.24401	0.00108884	0.0475777	PNLIP	Phospholipase A1 member A [Zootermopsis nevadensis]	-	-	-	-	-	-	-
miR-150-y	0.7567	0.01	-6.24165	0.0168191	Unigene0000972	3.5954	10.021	1.4788	1.76111e-06	0.000267556	Gyc32E	Guanylate cyclase 32E, partial [Zootermopsis nevadensis]	-	-	-	-	-	-	-
miR-150-y	0.7567	0.01	-6.24165	0.0168191	Unigene0001268	3.68483	8.4953	1.20507	9.86403e-06	0.00116813	--	histone-lysine n-methyltransferase setmar [Lasius niger]	-	-	-	-	-	-	-
miR-150-y	0.7567	0.01	-6.24165	0.0168191	Unigene0001703	1.36947	3.38927	1.30736	2.64405e-05	0.00267908	--	Apolipoprotein D [Zootermopsis nevadensis]	-	-	-	-	-	-	-
miR-150-y	0.7567	0.01	-6.24165	0.0168191	Unigene0002108	3.55747	8.12907	1.19224	4.43643e-05	0.00406503	--	hypothetical protein L798_03788 [Zootermopsis nevadensis]	-	-	-	-	-	-	-
miR-150-y	0.7567	0.01	-6.24165	0.0168191	Unigene0003846	8.02523	25.2436	1.6533	4.33574e-10	1.51279e-07	Rasl11a	PREDICTED: ras-related and estrogen-regulated growth inhibitor [Neodiprion lecontei]	-	-	-	-	GO:0044464//cell part	GO:0032550//purine ribonucleoside binding	GO:0008104//protein localization;GO:0035556//intracellular signal transduction
miR-150-y	0.7567	0.01	-6.24165	0.0168191	Unigene0004749	6.82943	14.5877	1.09491	8.03722e-06	0.000993711	dan	Protein distal antenna [Zootermopsis nevadensis]	-	-	-	-	-	-	-
miR-150-y	0.7567	0.01	-6.24165	0.0168191	Unigene0010072	12.7435	26.7263	1.06849	3.45115e-05	0.00331726	ZFAND6	PREDICTED: mucin-3A isoform X2 [Acyrthosiphon pisum]	-	-	-	-	-	-	-
miR-150-y	0.7567	0.01	-6.24165	0.0168191	Unigene0011775	5.37433	18.1411	1.7551	1.50722e-11	7.24373e-09	--	GM16903 [Drosophila sechellia]	-	-	-	-	-	-	-
miR-150-y	0.7567	0.01	-6.24165	0.0168191	Unigene0012138	0.994433	3.33987	1.74784	5.00149e-06	0.000663543	--	hypothetical protein L798_09722 [Zootermopsis nevadensis]	-	-	-	-	-	-	-
miR-150-y	0.7567	0.01	-6.24165	0.0168191	Unigene0012597	10.9679	33.9444	1.62988	5.71166e-06	0.000746535	--	soldier-specific protein-1 [Nasutitermes takasagoensis]	-	-	-	-	-	-	-
miR-150-y	0.7567	0.01	-6.24165	0.0168191	Unigene0013597	0.370067	1.08667	1.55405	0.000872241	0.040502	--	DDE superfamily endonuclease [Nuttalliella namaqua]	-	-	-	-	-	-	-
miR-150-y	0.7567	0.01	-6.24165	0.0168191	Unigene0014554	9.1624	18.3996	1.00588	7.77433e-05	0.00638038	DARS	Aspartyl-tRNA synthetase, cytoplasmic [Zootermopsis nevadensis]	Genetic Information Processing	Translation	ko00970//Aminoacyl-tRNA biosynthesis	K22503	GO:0044424//intracellular part	GO:0004812//aminoacyl-tRNA ligase activity;GO:0032550//purine ribonucleoside binding	GO:0006418//tRNA aminoacylation for protein translation
miR-150-y	0.7567	0.01	-6.24165	0.0168191	Unigene0015559	0.0989667	1.45643	3.87935	0.000199741	0.0132854	Drice	PREDICTED: caspase-1-like isoform X2 [Cephus cinctus]	Cellular Processes	Cell growth and death	ko04214//Apoptosis - fly ;ko04215//Apoptosis - multiple species	K04397	-	-	-
miR-150-y	0.7567	0.01	-6.24165	0.0168191	Unigene0038271	0.001	21.5981	14.3986	4.46294e-05	0.00408326	--	chitin binding peritrophin-A domain containing protein [Coptotermes formosanus]	-	-	-	-	-	-	-
miR-150-y	0.7567	0.01	-6.24165	0.0168191	Unigene0044814	0.770433	3.58107	2.21665	1.11029e-10	4.35355e-08	--	Lysozyme 1 [Zootermopsis nevadensis]	-	-	-	-	-	-	-
miR-150-y	0.7567	0.01	-6.24165	0.0168191	Unigene0047159	5.29713	11.0784	1.06447	4.61442e-05	0.00419081	--	Clarin-3 [Zootermopsis nevadensis]	-	-	-	-	-	-	-
miR-150-y	0.7567	0.01	-6.24165	0.0168191	Unigene0047174	0.3804	1.27173	1.74121	7.06226e-06	0.00089283	Ccnjl	Cyclin-J-like protein [Zootermopsis nevadensis]	-	-	-	-	-	-	-
miR-150-y	0.7567	0.01	-6.24165	0.0168191	Unigene0048058	1.89123	3.91743	1.05058	0.000530589	0.0281632	--	PREDICTED: zinc finger protein 91-like [Octopus bimaculoides]	-	-	-	-	-	-	-
miR-150-y	0.7567	0.01	-6.24165	0.0168191	Unigene0048690	1.5928	5.88413	1.88526	6.21172e-12	3.14443e-09	--	GD10515 [Drosophila simulans]	-	-	-	-	-	-	-
miR-150-y	0.7567	0.01	-6.24165	0.0168191	Unigene0048723	3.22943	6.8708	1.0892	1.84292e-05	0.00197938	Mblk-1	Mushroom body large-type Kenyon cell-specific protein 1 [Zootermopsis nevadensis]	Cellular Processes	Cell growth and death	ko04214//Apoptosis - fly	K20015	-	-	-
miR-150-y	0.7567	0.01	-6.24165	0.0168191	Unigene0049212	2.59333	7.76173	1.58157	2.34712e-08	5.7981e-06	--	HEAT repeat-containing protein 3 [Zootermopsis nevadensis]	-	-	-	-	-	-	-
miR-150-y	0.7567	0.01	-6.24165	0.0168191	Unigene0049990	18.5096	60.8344	1.71661	1.23944e-11	6.02713e-09	--	PREDICTED: sine oculis-binding protein homolog isoform X1 [Cimex lectularius]	-	-	-	-	-	-	-
miR-150-y	0.7567	0.01	-6.24165	0.0168191	Unigene0050422	2.4043	5.72143	1.25076	6.66941e-06	0.000851884	Aats-cys	PREDICTED: cysteine--tRNA ligase, cytoplasmic [Neodiprion lecontei]	Genetic Information Processing	Translation	ko00970//Aminoacyl-tRNA biosynthesis	K01883	-	GO:0004812//aminoacyl-tRNA ligase activity;GO:0032550//purine ribonucleoside binding	GO:0006418//tRNA aminoacylation for protein translation
miR-150-y	0.7567	0.01	-6.24165	0.0168191	Unigene0051008	2.72877	5.85103	1.10044	7.71335e-05	0.00633875	CG11583	Brix domain-containing protein 2-like protein [Zootermopsis nevadensis]	-	-	-	-	-	-	-
miR-150-y	0.7567	0.01	-6.24165	0.0168191	Unigene0052020	0.361333	1.32157	1.87085	2.65875e-05	0.00269177	--	PREDICTED: kinesin-like protein KIF20A isoform X2 [Polistes canadensis]	-	-	-	-	-	-	-
miR-150-y	0.7567	0.01	-6.24165	0.0168191	Unigene0053611	5.22413	10.7558	1.04186	6.51059e-05	0.00550274	IPO4	Importin-4, partial [Zootermopsis nevadensis]	-	-	-	-	-	-	-
miR-150-y	0.7567	0.01	-6.24165	0.0168191	Unigene0055053	1.72343	10.7253	2.63767	3.18473e-22	6.7821e-19	amdhd1	PREDICTED: probable imidazolonepropionase [Parasteatoda tepidariorum]	Metabolism	Global and overview maps;Amino acid metabolism	ko01100//Metabolic pathways;ko00340//Histidine metabolism	K01468	-	-	-
miR-150-y	0.7567	0.01	-6.24165	0.0168191	Unigene0057853	12.0515	30.0889	1.32001	5.10367e-06	0.000674925	sbk1	Serine/threonine-protein kinase SBK1 [Zootermopsis nevadensis]	-	-	-	-	-	-	-
miR-150-y	0.7567	0.01	-6.24165	0.0168191	Unigene0061309	28.2786	61.9532	1.13147	7.51649e-05	0.00621468	DUSP14	Dual specificity protein phosphatase 14 [Zootermopsis nevadensis]	-	-	-	-	-	GO:0016787//hydrolase activity	GO:0016311//dephosphorylation
miR-150-y	0.7567	0.01	-6.24165	0.0168191	Unigene0062211	6.69353	13.5747	1.02008	3.90898e-05	0.00367721	PIK3AP1	Phosphoinositide 3-kinase adapter protein 1, partial [Zootermopsis nevadensis]	-	-	-	-	-	-	-
miR-150-y	0.7567	0.01	-6.24165	0.0168191	Unigene0065387	26.3922	59.1841	1.1651	3.20548e-06	0.000455086	HSD17B13	Epidermal retinal dehydrogenase 2 [Zootermopsis nevadensis]	-	-	-	-	-	-	-
miR-150-y	0.7567	0.01	-6.24165	0.0168191	Unigene0065755	7.45583	17.3465	1.2182	2.34398e-05	0.00243496	AAEL000263	PREDICTED: zinc finger protein jing [Cerapachys biroi]	-	-	-	-	-	-	-
miR-150-y	0.7567	0.01	-6.24165	0.0168191	Unigene0066418	7.1687	16.7756	1.22658	1.42947e-06	0.00022293	Mical	PREDICTED: protein-methionine sulfoxide oxidase Mical isoform X10 [Cephus cinctus]	-	-	-	-	-	-	-
miR-150-y	0.7567	0.01	-6.24165	0.0168191	Unigene0070119	5.61073	15.4143	1.45801	4.33319e-06	0.000585573	col2a1	PREDICTED: fibril-forming collagen alpha chain-like [Neodiprion lecontei]	Environmental Information Processing	Signaling molecules and interaction	ko04512//ECM-receptor interaction	K19719	-	-	-
miR-150-y	0.7567	0.01	-6.24165	0.0168191	Unigene0072284	14.4483	42.4809	1.55591	9.53368e-08	2.01291e-05	AAEL008004	Elongation of very long chain fatty acids protein [Zootermopsis nevadensis]	-	-	-	-	GO:0016020//membrane	-	GO:0006631//fatty acid metabolic process
miR-150-y	0.7567	0.01	-6.24165	0.0168191	Unigene0072690	26.3386	74.9158	1.50809	9.87941e-10	3.24536e-07	Tret1	Sugar transporter ERD6-like 4 [Zootermopsis nevadensis]	-	-	-	-	-	-	-
miR-150-y	0.7567	0.01	-6.24165	0.0168191	Unigene0078826	1.09843	15.2586	3.7961	0.000161986	0.011305	--	Retinaldehyde-binding protein 1-like protein 2 [Zootermopsis nevadensis]	-	-	-	-	-	-	-
miR-151-x	23.1824	2.5062	-3.20946	0.000600348	Unigene0000205	0.0291	48.7056	10.7089	8.08929e-05	0.00655179	--	Retrovirus-related Pol polyprotein from type-1 retrotransposable element [Trichinella patagoniensis]	-	-	-	-	-	-	-
miR-151-x	23.1824	2.5062	-3.20946	0.000600348	Unigene0001636	2.5542	6.38673	1.32221	1.60163e-07	3.18048e-05	hgh1	Brain protein 16 [Zootermopsis nevadensis]	-	-	-	-	-	-	-
miR-151-x	23.1824	2.5062	-3.20946	0.000600348	Unigene0044752	1.78177	5.26343	1.5627	4.71573e-07	8.3209e-05	vg	vg [Blattella germanica]	-	-	-	-	-	-	-
miR-151-x	23.1824	2.5062	-3.20946	0.000600348	Unigene0046309	1.76823	3.9214	1.14906	4.98704e-05	0.00444846	Polr3e	DNA-directed RNA polymerase III subunit RPC5 [Zootermopsis nevadensis]	Genetic Information Processing;Metabolism	Transcription;Nucleotide metabolism	ko00230//Purine metabolism ;ko00240//Pyrimidine metabolism ;ko03020//RNA polymerase	K14721	-	-	-
miR-151-x	23.1824	2.5062	-3.20946	0.000600348	Unigene0052294	0.001	3.59613	11.8122	1.08054e-05	0.00126028	CPVL	serine carboxypeptidase [Coptotermes formosanus]	-	-	-	-	-	GO:0016787//hydrolase activity	-
miR-151-x	23.1824	2.5062	-3.20946	0.000600348	Unigene0068407	0.761433	2.37163	1.63909	4.15845e-05	0.00386771	l(3)mbn	PREDICTED: protein lethal(3)malignant blood neoplasm 1 isoform X1 [Halyomorpha halys]	-	-	-	-	-	-	-
miR-151-y	2.92843	0.1699	-4.10737	0.0177211	Unigene0001123	5.67737	12.3958	1.12656	1.29497e-05	0.00146876	--	endonuclease-reverse transcriptase [Blattella germanica]	-	-	-	-	-	-	-
miR-151-y	2.92843	0.1699	-4.10737	0.0177211	Unigene0001785	1.41493	3.6649	1.37304	1.20764e-05	0.00138885	--	Mite allergen Lep d 7 [Zootermopsis nevadensis]	-	-	-	-	-	-	-
miR-151-y	2.92843	0.1699	-4.10737	0.0177211	Unigene0003250	4.2621	8.88633	1.06002	2.69332e-05	0.00271564	Glra4	PREDICTED: glycine receptor subunit alpha-4 isoform X19 [Cimex lectularius]	-	-	-	-	-	-	-
miR-151-y	2.92843	0.1699	-4.10737	0.0177211	Unigene0004458	7.1191	26.5809	1.90062	1.06533e-09	3.49029e-07	--	enzymatic polyprotein endonuclease reverse [Lasius niger]	-	-	-	-	-	-	-
miR-151-y	2.92843	0.1699	-4.10737	0.0177211	Unigene0005733	9.52103	40.8393	2.10077	6.97205e-16	7.00124e-13	mariner\T	PREDICTED: histone-lysine N-methyltransferase SETMAR-like [Trachymyrmex septentrionalis]	Metabolism	Amino acid metabolism	ko00310//Lysine degradation	K11433	-	-	-
miR-151-y	2.92843	0.1699	-4.10737	0.0177211	Unigene0008365	4.03787	10.0844	1.32046	2.11896e-07	4.07398e-05	TFAP2B	PREDICTED: transcription factor AP-2-epsilon isoform X2 [Megachile rotundata]	-	-	-	-	GO:0043231//intracellular membrane-bounded organelle	-	GO:0010468//regulation of gene expression
miR-151-y	2.92843	0.1699	-4.10737	0.0177211	Unigene0008591	0.00556667	3.0958	9.11928	3.72309e-05	0.00353737	--	CLUMA_CG011727, isoform A [Clunio marinus]	-	-	-	-	-	-	-
miR-151-y	2.92843	0.1699	-4.10737	0.0177211	Unigene0010072	12.7435	26.7263	1.06849	3.45115e-05	0.00331726	ZFAND6	PREDICTED: mucin-3A isoform X2 [Acyrthosiphon pisum]	-	-	-	-	-	-	-
miR-151-y	2.92843	0.1699	-4.10737	0.0177211	Unigene0012084	28.6023	80.772	1.49772	6.25142e-09	1.75089e-06	slc36a4	PREDICTED: proton-coupled amino acid transporter 1-like isoform X3 [Halyomorpha halys]	-	-	-	-	-	-	-
miR-151-y	2.92843	0.1699	-4.10737	0.0177211	Unigene0014554	9.1624	18.3996	1.00588	7.77433e-05	0.00638038	DARS	Aspartyl-tRNA synthetase, cytoplasmic [Zootermopsis nevadensis]	Genetic Information Processing	Translation	ko00970//Aminoacyl-tRNA biosynthesis	K22503	GO:0044424//intracellular part	GO:0004812//aminoacyl-tRNA ligase activity;GO:0032550//purine ribonucleoside binding	GO:0006418//tRNA aminoacylation for protein translation
miR-151-y	2.92843	0.1699	-4.10737	0.0177211	Unigene0044242	0.0773667	1.2311	3.99209	0.00104123	0.0459315	CYP4C1	Cytochrome P450 4c3 [Zootermopsis nevadensis]	-	-	-	-	-	-	-
miR-151-y	2.92843	0.1699	-4.10737	0.0177211	Unigene0044636	0.5683	3.91823	2.78548	3.21885e-12	1.68464e-09	AGAP002721	PREDICTED: tryptophan 2,3-dioxygenase [Nicrophorus vespilloides]	Metabolism	Amino acid metabolism;Global and overview maps	ko01100//Metabolic pathways;ko00380//Tryptophan metabolism	K00453	-	-	-
miR-151-y	2.92843	0.1699	-4.10737	0.0177211	Unigene0047674	0.705933	45.6173	6.01391	8.51068e-06	0.00104079	--	hypothetical protein L798_02767 [Zootermopsis nevadensis]	-	-	-	-	-	-	-
miR-151-y	2.92843	0.1699	-4.10737	0.0177211	Unigene0047779	2.82043	6.02987	1.09621	5.84879e-05	0.00504831	--	hypothetical protein L798_00845 [Zootermopsis nevadensis]	-	-	-	-	-	-	-
miR-151-y	2.92843	0.1699	-4.10737	0.0177211	Unigene0048225	4.1924	9.33613	1.15505	2.9425e-05	0.00290059	IMP3	PREDICTED: U3 small nucleolar ribonucleoprotein protein IMP3 [Cimex lectularius]	Genetic Information Processing	Translation	ko03008//Ribosome biogenesis in eukaryotes	K14560	GO:0032991//macromolecular complex;GO:0044423//virion part;GO:0044464//cell part	GO:0003723//RNA binding	-
miR-151-y	2.92843	0.1699	-4.10737	0.0177211	Unigene0048541	7.53327	109.899	3.86676	5.97835e-21	1.04002e-17	MSTN	PREDICTED: growth/differentiation factor 8 [Cimex lectularius]	-	-	-	-	-	-	-
miR-151-y	2.92843	0.1699	-4.10737	0.0177211	Unigene0048643	41.8092	99.3696	1.24898	6.15812e-07	0.000105349	Inx3	PREDICTED: innexin inx3 [Papilio polytes]	-	-	-	-	GO:0031224//intrinsic component of membrane	-	GO:0044765//single-organism transport
miR-151-y	2.92843	0.1699	-4.10737	0.0177211	Unigene0048723	3.22943	6.8708	1.0892	1.84292e-05	0.00197938	Mblk-1	Mushroom body large-type Kenyon cell-specific protein 1 [Zootermopsis nevadensis]	Cellular Processes	Cell growth and death	ko04214//Apoptosis - fly	K20015	-	-	-
miR-151-y	2.92843	0.1699	-4.10737	0.0177211	Unigene0048928	10.3317	26.59	1.3638	1.34202e-07	2.69967e-05	Lrrn4	Insulin-like growth factor-binding protein complex acid labile chain [Zootermopsis nevadensis]	-	-	-	-	-	-	-
miR-151-y	2.92843	0.1699	-4.10737	0.0177211	Unigene0050159	0.911867	1.97053	1.11169	0.000383318	0.0220007	HLHmgamma	Enhancer of split mgamma protein [Zootermopsis nevadensis]	-	-	-	-	-	-	GO:0010467//gene expression;GO:0034645//cellular macromolecule biosynthetic process
miR-151-y	2.92843	0.1699	-4.10737	0.0177211	Unigene0050311	1.9186	4.0467	1.07669	0.000684601	0.0340276	--	E3 ubiquitin-protein ligase RAD18 [Zootermopsis nevadensis]	-	-	-	-	-	-	-
miR-151-y	2.92843	0.1699	-4.10737	0.0177211	Unigene0050437	13.0072	42.7001	1.71492	3.617e-11	1.5842e-08	--	P-selectin [Zootermopsis nevadensis]	-	-	-	-	-	-	-
miR-151-y	2.92843	0.1699	-4.10737	0.0177211	Unigene0051718	10.9301	28.9282	1.40417	1.10014e-07	2.29534e-05	ITIH4	PREDICTED: inter-alpha-trypsin inhibitor heavy chain H4-like [Halyomorpha halys]	-	-	-	-	-	-	-
miR-151-y	2.92843	0.1699	-4.10737	0.0177211	Unigene0052303	8.92197	21.5162	1.26999	0.000410955	0.0231565	MMEL1	Membrane metallo-endopeptidase-like 1 [Zootermopsis nevadensis]	-	-	-	-	-	GO:0070011//peptidase activity, acting on L-amino acid peptides	GO:0019538//protein metabolic process
miR-151-y	2.92843	0.1699	-4.10737	0.0177211	Unigene0053533	7.338	15.6737	1.09488	8.26007e-06	0.00101618	BMS1	Ribosome biogenesis protein BMS1-like protein [Zootermopsis nevadensis]	Genetic Information Processing	Translation	ko03008//Ribosome biogenesis in eukaryotes	K14569	-	-	-
miR-151-y	2.92843	0.1699	-4.10737	0.0177211	Unigene0054032	1.43597	2.9589	1.04304	0.000295876	0.0179937	--	RNA exonuclease 1-like protein [Zootermopsis nevadensis]	Genetic Information Processing	Translation	ko03008//Ribosome biogenesis in eukaryotes	K14570	-	-	-
miR-151-y	2.92843	0.1699	-4.10737	0.0177211	Unigene0054500	28.6996	59.2881	1.04671	1.90856e-05	0.00203396	ADAMTS2	A disintegrin and metalloproteinase with thrombospondin motifs 3 [Zootermopsis nevadensis]	-	-	-	-	-	-	-
miR-151-y	2.92843	0.1699	-4.10737	0.0177211	Unigene0054973	1.00457	5.2512	2.38607	6.19551e-06	0.000800458	Far1	CLUMA_CG013629, isoform A [Clunio marinus]	Cellular Processes;Organismal Systems	Transport and catabolism;Aging	ko04212//Longevity regulating pathway - worm ;ko04146//Peroxisome	K13356	-	-	-
miR-151-y	2.92843	0.1699	-4.10737	0.0177211	Unigene0055978	17.6549	53.807	1.60772	2.01007e-10	7.52343e-08	--	PREDICTED: ankyrin repeat and SOCS box protein 14-like [Bemisia tabaci]	-	-	-	-	-	-	-
miR-151-y	2.92843	0.1699	-4.10737	0.0177211	Unigene0056609	4.4568	10.9774	1.30046	1.29473e-05	0.00146876	--	PREDICTED: sodium channel protein Nach-like [Cimex lectularius]	-	-	-	-	-	-	-
miR-151-y	2.92843	0.1699	-4.10737	0.0177211	Unigene0060481	0.658467	6.1772	3.22977	0.000780973	0.0376363	--	AAEL010623-PA [Aedes aegypti]	-	-	-	-	-	-	-
miR-151-y	2.92843	0.1699	-4.10737	0.0177211	Unigene0060530	1.13893	2.85417	1.32539	7.73989e-06	0.000962731	NINJ2	PREDICTED: ninjurin-2-like isoform X3 [Anoplophora glabripennis]	-	-	-	-	-	-	-
miR-151-y	2.92843	0.1699	-4.10737	0.0177211	Unigene0061309	28.2786	61.9532	1.13147	7.51649e-05	0.00621468	DUSP14	Dual specificity protein phosphatase 14 [Zootermopsis nevadensis]	-	-	-	-	-	GO:0016787//hydrolase activity	GO:0016311//dephosphorylation
miR-151-y	2.92843	0.1699	-4.10737	0.0177211	Unigene0062571	4.6532	16.5872	1.83377	6.68959e-13	3.84309e-10	--	PREDICTED: protein eva-1 isoform X4 [Nicrophorus vespilloides]	-	-	-	-	-	-	-
miR-151-y	2.92843	0.1699	-4.10737	0.0177211	Unigene0062877	9.78077	24.7357	1.33858	2.43455e-05	0.00251214	--	seminal fluid protein [Nilaparvata lugens]	-	-	-	-	-	-	-
miR-151-y	2.92843	0.1699	-4.10737	0.0177211	Unigene0064382	13.9801	40.2775	1.5266	2.32694e-09	7.1318e-07	tubb1	beta-tubulin 4 [Nilaparvata lugens]	Cellular Processes	Transport and catabolism	ko04145//Phagosome	K07375	-	-	-
miR-151-y	2.92843	0.1699	-4.10737	0.0177211	Unigene0065410	11.3147	23.0624	1.02734	2.70927e-05	0.0027229	CdGAPr	PREDICTED: GTPase-activating protein CdGAPr isoform X1 [Cephus cinctus]	-	-	-	-	-	-	-
miR-151-y	2.92843	0.1699	-4.10737	0.0177211	Unigene0068832	5.03107	10.7148	1.09067	4.86702e-05	0.00436565	--	Alpha-tocopherol transfer protein-like [Zootermopsis nevadensis]	-	-	-	-	-	-	-
miR-155-x	4.19103	0.0849333	-5.62483	2.01378e-06	Unigene0000041	0.0616667	10.8153	7.45437	2.26916e-05	0.00236519	--	osiris 16-like protein [Lasius niger]	-	-	-	-	-	-	-
miR-155-x	4.19103	0.0849333	-5.62483	2.01378e-06	Unigene0000261	0.3418	4.415	3.69119	1.48456e-05	0.00164306	--	PREDICTED: centrosome-associated protein CEP250-like [Dendroctonus ponderosae]	-	-	-	-	-	-	-
miR-155-x	4.19103	0.0849333	-5.62483	2.01378e-06	Unigene0000972	3.5954	10.021	1.4788	1.76111e-06	0.000267556	Gyc32E	Guanylate cyclase 32E, partial [Zootermopsis nevadensis]	-	-	-	-	-	-	-
miR-155-x	4.19103	0.0849333	-5.62483	2.01378e-06	Unigene0001785	1.41493	3.6649	1.37304	1.20764e-05	0.00138885	--	Mite allergen Lep d 7 [Zootermopsis nevadensis]	-	-	-	-	-	-	-
miR-155-x	4.19103	0.0849333	-5.62483	2.01378e-06	Unigene0003846	8.02523	25.2436	1.6533	4.33574e-10	1.51279e-07	Rasl11a	PREDICTED: ras-related and estrogen-regulated growth inhibitor [Neodiprion lecontei]	-	-	-	-	GO:0044464//cell part	GO:0032550//purine ribonucleoside binding	GO:0008104//protein localization;GO:0035556//intracellular signal transduction
miR-155-x	4.19103	0.0849333	-5.62483	2.01378e-06	Unigene0004316	12.5618	38.4676	1.6146	3.15188e-09	9.36508e-07	ARL4C	ADP-ribosylation factor-like protein 4A [Zootermopsis nevadensis]	-	-	-	-	-	-	-
miR-155-x	4.19103	0.0849333	-5.62483	2.01378e-06	Unigene0004413	2.69953	13.0508	2.27335	2.03031e-14	1.52911e-11	Cyp6a14	cytochrome P450 [Hodotermopsis sjostedti]	-	-	-	-	-	GO:0016712//oxidoreductase activity, acting on paired donors, with incorporation or reduction of molecular oxygen, reduced flavin or flavoprotein as one donor, and incorporation of one atom of oxygen;GO:0046906//tetrapyrrole binding;GO:0046914//transition metal ion binding	GO:0044710//single-organism metabolic process
miR-155-x	4.19103	0.0849333	-5.62483	2.01378e-06	Unigene0005998	5.99127	12.4726	1.05783	4.59602e-05	0.00417717	Nelf-E	Negative elongation factor E [Zootermopsis nevadensis]	-	-	-	-	-	GO:0008135//translation factor activity, RNA binding	GO:0034645//cellular macromolecule biosynthetic process
miR-155-x	4.19103	0.0849333	-5.62483	2.01378e-06	Unigene0009740	3.7077	10.2804	1.4713	1.00425e-06	0.000163426	KLF2	PREDICTED: Krueppel-like factor 9 [Anoplophora glabripennis]	-	-	-	-	-	GO:0043169//cation binding	-
miR-155-x	4.19103	0.0849333	-5.62483	2.01378e-06	Unigene0011775	5.37433	18.1411	1.7551	1.50722e-11	7.24373e-09	--	GM16903 [Drosophila sechellia]	-	-	-	-	-	-	-
miR-155-x	4.19103	0.0849333	-5.62483	2.01378e-06	Unigene0013587	3.1894	10.5935	1.73182	2.49757e-11	1.12999e-08	--	Peptidyl-prolyl cis-trans isomerase SDCCAG10, partial [Zootermopsis nevadensis]	-	-	-	-	-	-	-
miR-155-x	4.19103	0.0849333	-5.62483	2.01378e-06	Unigene0013754	3.24617	8.3187	1.35762	2.34253e-07	4.41737e-05	Lrrc47	Leucine-rich repeat-containing protein 47 [Zootermopsis nevadensis]	-	-	-	-	-	-	-
miR-155-x	4.19103	0.0849333	-5.62483	2.01378e-06	Unigene0014173	0.0899333	2.1223	4.56063	0.000111766	0.00842783	--	Leucine-rich repeat neuronal protein 2 [Zootermopsis nevadensis]	-	-	-	-	-	-	-
miR-155-x	4.19103	0.0849333	-5.62483	2.01378e-06	Unigene0015824	1.5256	3.11297	1.02891	0.000572294	0.029788	--	Leucine-rich repeat-containing protein [Zootermopsis nevadensis]	-	-	-	-	-	-	-
miR-155-x	4.19103	0.0849333	-5.62483	2.01378e-06	Unigene0024149	0.512667	1.4925	1.54164	0.000229309	0.01486	--	Protein abnormal spindle [Zootermopsis nevadensis]	-	-	-	-	-	-	-
miR-155-x	4.19103	0.0849333	-5.62483	2.01378e-06	Unigene0046825	18.1032	43.5442	1.26623	0.000170324	0.0117594	Spon1	PREDICTED: somatomedin-B and thrombospondin type-1 domain-containing protein [Acyrthosiphon pisum]	-	-	-	-	-	-	-
miR-155-x	4.19103	0.0849333	-5.62483	2.01378e-06	Unigene0048225	4.1924	9.33613	1.15505	2.9425e-05	0.00290059	IMP3	PREDICTED: U3 small nucleolar ribonucleoprotein protein IMP3 [Cimex lectularius]	Genetic Information Processing	Translation	ko03008//Ribosome biogenesis in eukaryotes	K14560	GO:0032991//macromolecular complex;GO:0044423//virion part;GO:0044464//cell part	GO:0003723//RNA binding	-
miR-155-x	4.19103	0.0849333	-5.62483	2.01378e-06	Unigene0048521	4.12033	17.7322	2.10554	5.30039e-10	1.82361e-07	--	hypothetical protein L798_04620 [Zootermopsis nevadensis]	-	-	-	-	-	-	-
miR-155-x	4.19103	0.0849333	-5.62483	2.01378e-06	Unigene0049105	0.266133	4.48067	4.07349	3.15382e-28	1.39123e-24	ACP21	PREDICTED: cuticle protein 19 [Cimex lectularius]	-	-	-	-	-	-	-
miR-155-x	4.19103	0.0849333	-5.62483	2.01378e-06	Unigene0049498	6.05953	15.998	1.40062	1.42868e-07	2.85539e-05	CG9987	PREDICTED: tRNA-splicing ligase RtcB homolog [Tribolium castaneum]	-	-	-	-	GO:0043234//protein complex	GO:0008452//RNA ligase activity;GO:0032550//purine ribonucleoside binding;GO:0043169//cation binding	GO:0000394//RNA splicing, via endonucleolytic cleavage and ligation;GO:0006399//tRNA metabolic process
miR-155-x	4.19103	0.0849333	-5.62483	2.01378e-06	Unigene0050100	3.063	26.2877	3.10137	8.28191e-05	0.00666514	--	chemosensory protein [Blattella germanica]	-	-	-	-	-	-	-
miR-155-x	4.19103	0.0849333	-5.62483	2.01378e-06	Unigene0050437	13.0072	42.7001	1.71492	3.617e-11	1.5842e-08	--	P-selectin [Zootermopsis nevadensis]	-	-	-	-	-	-	-
miR-155-x	4.19103	0.0849333	-5.62483	2.01378e-06	Unigene0051581	0.2836	1.12937	1.99358	7.24011e-06	0.000910654	--	DNA polymerase V [Zootermopsis nevadensis]	-	-	-	-	-	-	-
miR-155-x	4.19103	0.0849333	-5.62483	2.01378e-06	Unigene0051719	0.4049	1.32207	1.70716	0.000515738	0.0274931	--	clip domain serine protease [Coptotermes formosanus]	-	-	-	-	-	-	-
miR-155-x	4.19103	0.0849333	-5.62483	2.01378e-06	Unigene0053611	5.22413	10.7558	1.04186	6.51059e-05	0.00550274	IPO4	Importin-4, partial [Zootermopsis nevadensis]	-	-	-	-	-	-	-
miR-155-x	4.19103	0.0849333	-5.62483	2.01378e-06	Unigene0055429	18.6865	62.3222	1.73775	3.16388e-11	1.40067e-08	NFIX	PREDICTED: nuclear factor 1 X-type isoform X4 [Bemisia tabaci]	-	-	-	-	-	-	-
miR-155-x	4.19103	0.0849333	-5.62483	2.01378e-06	Unigene0055978	17.6549	53.807	1.60772	2.01007e-10	7.52343e-08	--	PREDICTED: ankyrin repeat and SOCS box protein 14-like [Bemisia tabaci]	-	-	-	-	-	-	-
miR-155-x	4.19103	0.0849333	-5.62483	2.01378e-06	Unigene0056734	16.4333	34.8725	1.08547	8.34645e-06	0.00102448	PSMA1	Proteasome subunit alpha type-1 [Zootermopsis nevadensis]	Genetic Information Processing	Folding, sorting and degradation	ko03050//Proteasome	K02725	-	-	-
miR-155-x	4.19103	0.0849333	-5.62483	2.01378e-06	Unigene0057363	26.4465	81.4372	1.62261	1.01934e-10	4.02248e-08	--	PREDICTED: glycogenin-1 isoform X2 [Apis cerana]	Metabolism	Carbohydrate metabolism;Global and overview maps	ko01100//Metabolic pathways;ko00500//Starch and sucrose metabolism	K00750	-	-	-
miR-155-x	4.19103	0.0849333	-5.62483	2.01378e-06	Unigene0057853	12.0515	30.0889	1.32001	5.10367e-06	0.000674925	sbk1	Serine/threonine-protein kinase SBK1 [Zootermopsis nevadensis]	-	-	-	-	-	-	-
miR-155-x	4.19103	0.0849333	-5.62483	2.01378e-06	Unigene0059394	1.2559	3.99853	1.67075	8.86593e-06	0.00107466	Crisp2	Cysteine-rich secretory protein 2 [Zootermopsis nevadensis]	-	-	-	-	-	-	-
miR-155-x	4.19103	0.0849333	-5.62483	2.01378e-06	Unigene0059721	3.4873	23.7964	2.77056	1.06481e-14	8.43076e-12	--	AGAP002550-PA [Anopheles gambiae str. PEST] [Anopheles gambiae]	-	-	-	-	-	-	-
miR-155-x	4.19103	0.0849333	-5.62483	2.01378e-06	Unigene0060530	1.13893	2.85417	1.32539	7.73989e-06	0.000962731	NINJ2	PREDICTED: ninjurin-2-like isoform X3 [Anoplophora glabripennis]	-	-	-	-	-	-	-
miR-155-x	4.19103	0.0849333	-5.62483	2.01378e-06	Unigene0061358	2.30363	6.23277	1.43596	4.58738e-05	0.00417478	--	PREDICTED: protein NDNF [Anoplophora glabripennis]	-	-	-	-	-	-	-
miR-155-x	4.19103	0.0849333	-5.62483	2.01378e-06	Unigene0062015	3.93237	8.3073	1.07898	2.52182e-05	0.00257636	Rsl1d1	Ribosomal L1 domain-containing protein 1 [Zootermopsis nevadensis]	-	-	-	-	-	-	-
miR-155-x	4.19103	0.0849333	-5.62483	2.01378e-06	Unigene0069003	13.7435	29.7895	1.11606	9.51374e-06	0.00113755	--	PREDICTED: nucleolin 1 isoform X2 [Neodiprion lecontei]	-	-	-	-	-	-	-
miR-155-x	4.19103	0.0849333	-5.62483	2.01378e-06	Unigene0070119	5.61073	15.4143	1.45801	4.33319e-06	0.000585573	col2a1	PREDICTED: fibril-forming collagen alpha chain-like [Neodiprion lecontei]	Environmental Information Processing	Signaling molecules and interaction	ko04512//ECM-receptor interaction	K19719	-	-	-
miR-155-x	4.19103	0.0849333	-5.62483	2.01378e-06	Unigene0072595	4.10717	10.4111	1.34191	0.000149475	0.0106167	IL16	Pro-interleukin-16 [Zootermopsis nevadensis]	-	-	-	-	-	-	-
miR-155-x	4.19103	0.0849333	-5.62483	2.01378e-06	Unigene0073996	3.79303	13.8296	1.86633	2.57233e-06	0.000377341	--	PREDICTED: mucin-5AC [Linepithema humile]	-	-	-	-	-	-	-
miR-155-x	4.19103	0.0849333	-5.62483	2.01378e-06	Unigene0074012	324.781	1471.75	2.17999	1.69605e-14	1.29313e-11	--	Leucine-rich repeat-containing protein 20 [Zootermopsis nevadensis]	-	-	-	-	-	-	-
miR-155-x	4.19103	0.0849333	-5.62483	2.01378e-06	Unigene0074297	0.619433	1.35083	1.12483	0.00115769	0.0498576	--	Retinoblastoma-like protein 2 [Zootermopsis nevadensis]	-	-	-	-	-	-	-
miR-155-x	4.19103	0.0849333	-5.62483	2.01378e-06	Unigene0078289	41.5705	83.3943	1.00439	9.00602e-05	0.0071215	RNF31	RING finger protein 31 [Zootermopsis nevadensis]	-	-	-	-	-	-	-
miR-15-x	8.84493	0.896433	-3.30258	0.000857024	Unigene0001076	1.12863	2.56927	1.18678	0.000190851	0.0128184	--	hypothetical protein L798_10476 [Zootermopsis nevadensis]	-	-	-	-	-	-	-
miR-15-x	8.84493	0.896433	-3.30258	0.000857024	Unigene0001636	2.5542	6.38673	1.32221	1.60163e-07	3.18048e-05	hgh1	Brain protein 16 [Zootermopsis nevadensis]	-	-	-	-	-	-	-
miR-15-x	8.84493	0.896433	-3.30258	0.000857024	Unigene0003250	4.2621	8.88633	1.06002	2.69332e-05	0.00271564	Glra4	PREDICTED: glycine receptor subunit alpha-4 isoform X19 [Cimex lectularius]	-	-	-	-	-	-	-
miR-15-x	8.84493	0.896433	-3.30258	0.000857024	Unigene0003691	3.84043	9.05497	1.23744	1.01013e-06	0.000164166	GRIK2	PREDICTED: glutamate receptor ionotropic, kainate 2 isoform X2 [Tribolium castaneum]	-	-	-	-	GO:0031224//intrinsic component of membrane;GO:0097060//synaptic membrane	GO:0005231//excitatory extracellular ligand-gated ion channel activity	GO:0006811//ion transport;GO:0007215//glutamate receptor signaling pathway
miR-15-x	8.84493	0.896433	-3.30258	0.000857024	Unigene0004316	12.5618	38.4676	1.6146	3.15188e-09	9.36508e-07	ARL4C	ADP-ribosylation factor-like protein 4A [Zootermopsis nevadensis]	-	-	-	-	-	-	-
miR-15-x	8.84493	0.896433	-3.30258	0.000857024	Unigene0004647	1.9383	4.01037	1.04894	0.000118767	0.0088584	iHog	Interference hedgehog [Zootermopsis nevadensis]	Environmental Information Processing	Signal transduction	ko04341//Hedgehog signaling pathway - fly	K20245	-	-	-
miR-15-x	8.84493	0.896433	-3.30258	0.000857024	Unigene0005998	5.99127	12.4726	1.05783	4.59602e-05	0.00417717	Nelf-E	Negative elongation factor E [Zootermopsis nevadensis]	-	-	-	-	-	GO:0008135//translation factor activity, RNA binding	GO:0034645//cellular macromolecule biosynthetic process
miR-15-x	8.84493	0.896433	-3.30258	0.000857024	Unigene0007263	5.3711	11.285	1.07111	7.99372e-05	0.00649142	per	Period circadian protein [Zootermopsis nevadensis]	Organismal Systems	Environmental adaptation	ko04711//Circadian rhythm - fly	K02633	-	-	-
miR-15-x	8.84493	0.896433	-3.30258	0.000857024	Unigene0008407	11.2096	23.1519	1.0464	3.46065e-05	0.00332191	--	obstructor B [Locusta migratoria]	-	-	-	-	-	GO:0043169//cation binding	-
miR-15-x	8.84493	0.896433	-3.30258	0.000857024	Unigene0010594	0.679033	1.55313	1.19363	0.00037792	0.021782	tll1	Dorsal-ventral patterning tolloid-like protein 1, partial [Zootermopsis nevadensis]	-	-	-	-	-	-	-
miR-15-x	8.84493	0.896433	-3.30258	0.000857024	Unigene0011525	14.6845	33.7571	1.20089	3.23821e-06	0.000458678	Zc2hc1b	PREDICTED: zinc finger C2HC domain-containing protein 1C-like [Aethina tumida]	-	-	-	-	-	-	-
miR-15-x	8.84493	0.896433	-3.30258	0.000857024	Unigene0013956	0.2329	3.49627	3.90803	2.80967e-13	1.70116e-10	Pxt	PREDICTED: chorion peroxidase [Neodiprion lecontei]	-	-	-	-	-	GO:0003824//catalytic activity;GO:0046906//tetrapyrrole binding	GO:0006950//response to stress;GO:0044710//single-organism metabolic process
miR-15-x	8.84493	0.896433	-3.30258	0.000857024	Unigene0013971	0.253233	0.915267	1.85372	1.15975e-05	0.00134251	--	hypothetical protein L798_03788 [Zootermopsis nevadensis]	-	-	-	-	-	-	-
miR-15-x	8.84493	0.896433	-3.30258	0.000857024	Unigene0035211	0.0263333	33.3717	10.3075	0.000228948	0.0148444	--	osiris 8 precursor [Nasonia vitripennis]	-	-	-	-	-	-	-
miR-15-x	8.84493	0.896433	-3.30258	0.000857024	Unigene0035706	1.6188	3.65663	1.17559	0.000568407	0.0296858	RpS14a	40S ribosomal protein S14 [Zootermopsis nevadensis]	Genetic Information Processing	Translation	ko03010//Ribosome	K02955	GO:0030529//intracellular ribonucleoprotein complex	-	GO:0010467//gene expression
miR-15-x	8.84493	0.896433	-3.30258	0.000857024	Unigene0040109	0.8119	1.666	1.03701	0.000993429	0.0443773	--	Rho GTPase-activating protein 11A [Zootermopsis nevadensis]	-	-	-	-	-	-	-
miR-15-x	8.84493	0.896433	-3.30258	0.000857024	Unigene0043439	3.3603	8.70217	1.37278	1.19533e-06	0.00019075	ski	Ski oncogene [Zootermopsis nevadensis]	-	-	-	-	-	-	-
miR-15-x	8.84493	0.896433	-3.30258	0.000857024	Unigene0044636	0.5683	3.91823	2.78548	3.21885e-12	1.68464e-09	AGAP002721	PREDICTED: tryptophan 2,3-dioxygenase [Nicrophorus vespilloides]	Metabolism	Amino acid metabolism;Global and overview maps	ko01100//Metabolic pathways;ko00380//Tryptophan metabolism	K00453	-	-	-
miR-15-x	8.84493	0.896433	-3.30258	0.000857024	Unigene0045562	3.4092	13.1115	1.94332	6.45435e-12	3.25391e-09	Chac1	PREDICTED: glutathione-specific gamma-glutamylcyclotransferase 1 [Athalia rosae]	Metabolism	Global and overview maps;Metabolism of other amino acids	ko01100//Metabolic pathways;ko00480//Glutathione metabolism	K07232	-	-	-
miR-15-x	8.84493	0.896433	-3.30258	0.000857024	Unigene0046716	0.055	8.30053	7.23763	2.04891e-05	0.0021667	--	tudor and kh domain-containing protein, partial [Lasius niger]	-	-	-	-	-	-	-
miR-15-x	8.84493	0.896433	-3.30258	0.000857024	Unigene0047409	4.09213	8.36887	1.03218	5.81545e-05	0.00502305	Utp14b	U3 small nucleolar RNA-associated protein 14-like protein A [Zootermopsis nevadensis]	Genetic Information Processing	Translation	ko03008//Ribosome biogenesis in eukaryotes	K14567	-	-	-
miR-15-x	8.84493	0.896433	-3.30258	0.000857024	Unigene0047651	2.2342	4.7313	1.08248	0.000234263	0.0150703	--	hypothetical protein OCBIM_22037956mg, partial [Octopus bimaculoides]	-	-	-	-	-	-	-
miR-15-x	8.84493	0.896433	-3.30258	0.000857024	Unigene0048153	1.84653	3.99657	1.11394	0.000115047	0.00862675	--	PREDICTED: transcription factor Adf-1-like [Acyrthosiphon pisum]	-	-	-	-	-	-	-
miR-15-x	8.84493	0.896433	-3.30258	0.000857024	Unigene0048723	3.22943	6.8708	1.0892	1.84292e-05	0.00197938	Mblk-1	Mushroom body large-type Kenyon cell-specific protein 1 [Zootermopsis nevadensis]	Cellular Processes	Cell growth and death	ko04214//Apoptosis - fly	K20015	-	-	-
miR-15-x	8.84493	0.896433	-3.30258	0.000857024	Unigene0048910	4.5773	9.95963	1.1216	3.3284e-05	0.0032168	CG2614	Methyltransferase-like protein 13 [Zootermopsis nevadensis]	-	-	-	-	-	-	-
miR-15-x	8.84493	0.896433	-3.30258	0.000857024	Unigene0048944	3.21467	8.95827	1.47855	2.29319e-08	5.68762e-06	brat	B-box type zinc finger protein ncl-1, partial [Zootermopsis nevadensis]	-	-	-	-	-	-	-
miR-15-x	8.84493	0.896433	-3.30258	0.000857024	Unigene0049561	3.12367	7.60997	1.28465	8.05426e-06	0.000994821	sgl	UDP-glucose 6-dehydrogenase [Zootermopsis nevadensis]	Metabolism	Global and overview maps;Carbohydrate metabolism	ko01100//Metabolic pathways;ko00040//Pentose and glucuronate interconversions ;ko00520//Amino sugar and nucleotide sugar metabolism ;ko00053//Ascorbate and aldarate metabolism	K00012	-	GO:0000166//nucleotide binding;GO:0016614//oxidoreductase activity, acting on CH-OH group of donors	GO:0044710//single-organism metabolic process
miR-15-x	8.84493	0.896433	-3.30258	0.000857024	Unigene0050357	0.0587	54.6264	9.86202	1.03391e-05	0.00121391	--	Postacrosomal sheath WW domain-binding protein [Melipona quadrifasciata]	-	-	-	-	-	-	-
miR-15-x	8.84493	0.896433	-3.30258	0.000857024	Unigene0050422	2.4043	5.72143	1.25076	6.66941e-06	0.000851884	Aats-cys	PREDICTED: cysteine--tRNA ligase, cytoplasmic [Neodiprion lecontei]	Genetic Information Processing	Translation	ko00970//Aminoacyl-tRNA biosynthesis	K01883	-	GO:0004812//aminoacyl-tRNA ligase activity;GO:0032550//purine ribonucleoside binding	GO:0006418//tRNA aminoacylation for protein translation
miR-15-x	8.84493	0.896433	-3.30258	0.000857024	Unigene0050707	5.36	39.7869	2.89199	2.2581e-21	4.35796e-18	Gadd45a	Growth arrest and DNA-damage-inducible protein GADD45 gamma [Zootermopsis nevadensis]	Environmental Information Processing	Signal transduction	ko04010//MAPK signaling pathway ;ko04068//FoxO signaling pathway	K04402	-	-	-
miR-15-x	8.84493	0.896433	-3.30258	0.000857024	Unigene0050825	1.92777	4.17357	1.11435	0.000189688	0.012761	Mcm6	DNA replication licensing factor Mcm6 [Zootermopsis nevadensis]	Genetic Information Processing	Replication and repair	ko03030//DNA replication	K02542	GO:0043231//intracellular membrane-bounded organelle;GO:0043234//protein complex	GO:0003676//nucleic acid binding;GO:0004386//helicase activity;GO:0032550//purine ribonucleoside binding	GO:0006259//DNA metabolic process;GO:0032392//DNA geometric change
miR-15-x	8.84493	0.896433	-3.30258	0.000857024	Unigene0051718	10.9301	28.9282	1.40417	1.10014e-07	2.29534e-05	ITIH4	PREDICTED: inter-alpha-trypsin inhibitor heavy chain H4-like [Halyomorpha halys]	-	-	-	-	-	-	-
miR-15-x	8.84493	0.896433	-3.30258	0.000857024	Unigene0051736	4.77793	22.4584	2.2328	9.44148e-15	7.62199e-12	hes4-a	Transcription factor HES-4-A [Zootermopsis nevadensis]	-	-	-	-	-	-	-
miR-15-x	8.84493	0.896433	-3.30258	0.000857024	Unigene0051792	0.630433	1.39413	1.14495	9.34777e-05	0.0073196	B0563.6	PREDICTED: probable G-protein coupled receptor B0563.6 [Neodiprion lecontei]	-	-	-	-	-	-	-
miR-15-x	8.84493	0.896433	-3.30258	0.000857024	Unigene0051940	8.04857	17.3779	1.11045	3.13676e-05	0.00305068	nifk	MKI67 FHA domain-interacting nucleolar phosphoprotein-like [Zootermopsis nevadensis]	-	-	-	-	-	-	-
miR-15-x	8.84493	0.896433	-3.30258	0.000857024	Unigene0052207	6.2589	20.5978	1.71851	7.44855e-11	3.02634e-08	AGPAT1	1-acyl-sn-glycerol-3-phosphate acyltransferase alpha [Zootermopsis nevadensis]	Metabolism	Lipid metabolism;Global and overview maps	ko01100//Metabolic pathways;ko00564//Glycerophospholipid metabolism ;ko00561//Glycerolipid metabolism	K13509	-	GO:0016740//transferase activity	GO:0006629//lipid metabolic process
miR-15-x	8.84493	0.896433	-3.30258	0.000857024	Unigene0052303	8.92197	21.5162	1.26999	0.000410955	0.0231565	MMEL1	Membrane metallo-endopeptidase-like 1 [Zootermopsis nevadensis]	-	-	-	-	-	GO:0070011//peptidase activity, acting on L-amino acid peptides	GO:0019538//protein metabolic process
miR-15-x	8.84493	0.896433	-3.30258	0.000857024	Unigene0053292	0.4056	1.57917	1.96103	3.81735e-05	0.00361026	--	Myb/SANT-like transcription factor [Oryctes borbonicus]	-	-	-	-	-	-	-
miR-15-x	8.84493	0.896433	-3.30258	0.000857024	Unigene0053447	0.949033	2.21263	1.22123	0.00011429	0.00859196	pain	Transient receptor potential cation channel protein painless [Zootermopsis nevadensis]	-	-	-	-	-	-	-
miR-15-x	8.84493	0.896433	-3.30258	0.000857024	Unigene0053817	7.66773	15.7791	1.04115	6.88206e-05	0.00575998	SPON1	Spondin-1 [Zootermopsis nevadensis]	-	-	-	-	-	-	-
miR-15-x	8.84493	0.896433	-3.30258	0.000857024	Unigene0053858	2.17043	6.27943	1.53265	1.86805e-06	0.000282761	CCND2	PREDICTED: G1/S-specific cyclin-D2 [Neodiprion lecontei]	Environmental Information Processing	Signal transduction	ko04310//Wnt signaling pathway ;ko04068//FoxO signaling pathway	K10151	-	-	-
miR-15-x	8.84493	0.896433	-3.30258	0.000857024	Unigene0055429	18.6865	62.3222	1.73775	3.16388e-11	1.40067e-08	NFIX	PREDICTED: nuclear factor 1 X-type isoform X4 [Bemisia tabaci]	-	-	-	-	-	-	-
miR-15-x	8.84493	0.896433	-3.30258	0.000857024	Unigene0055459	1.01217	9.84203	3.28151	4.42427e-05	0.00405991	KLKB1	seminal fluid protein CSSFP033 [Chilo suppressalis]	-	-	-	-	-	-	-
miR-15-x	8.84493	0.896433	-3.30258	0.000857024	Unigene0055471	9.76947	21.0043	1.10433	4.37199e-05	0.00402089	PDPK1	3-phosphoinositide-dependent protein kinase 1 [Zootermopsis nevadensis]	Cellular Processes;Environmental Information Processing	Signal transduction;Transport and catabolism	ko04140//Autophagy - animal ;ko04150//mTOR signaling pathway ;ko04068//FoxO signaling pathway	K06276	-	GO:0004672//protein kinase activity	-
miR-15-x	8.84493	0.896433	-3.30258	0.000857024	Unigene0056327	1.6315	3.47177	1.08947	6.82871e-05	0.00572995	--	Unhealthy ribosome biogenesis protein 2-like protein [Zootermopsis nevadensis]	-	-	-	-	-	-	-
miR-15-x	8.84493	0.896433	-3.30258	0.000857024	Unigene0056652	17.4319	39.6782	1.18661	4.24778e-06	0.000577188	SERPINB6	Leukocyte elastase inhibitor C [Zootermopsis nevadensis]	-	-	-	-	-	-	-
miR-15-x	8.84493	0.896433	-3.30258	0.000857024	Unigene0056734	16.4333	34.8725	1.08547	8.34645e-06	0.00102448	PSMA1	Proteasome subunit alpha type-1 [Zootermopsis nevadensis]	Genetic Information Processing	Folding, sorting and degradation	ko03050//Proteasome	K02725	-	-	-
miR-15-x	8.84493	0.896433	-3.30258	0.000857024	Unigene0057091	32.667	84.0628	1.36363	4.07551e-07	7.32732e-05	PebIII	chemosensory protein [Blattella germanica]	-	-	-	-	-	-	-
miR-15-x	8.84493	0.896433	-3.30258	0.000857024	Unigene0057363	26.4465	81.4372	1.62261	1.01934e-10	4.02248e-08	--	PREDICTED: glycogenin-1 isoform X2 [Apis cerana]	Metabolism	Carbohydrate metabolism;Global and overview maps	ko01100//Metabolic pathways;ko00500//Starch and sucrose metabolism	K00750	-	-	-
miR-15-x	8.84493	0.896433	-3.30258	0.000857024	Unigene0057615	3.16867	21.3314	2.75103	0.000357451	0.0209145	YNG2	Chromatin modification-related protein YNG2, partial [Zootermopsis nevadensis]	-	-	-	-	GO:0043231//intracellular membrane-bounded organelle	GO:0046914//transition metal ion binding	GO:0006325//chromatin organization
miR-15-x	8.84493	0.896433	-3.30258	0.000857024	Unigene0057775	6.43987	14.5438	1.1753	5.83967e-06	0.00076246	--	PREDICTED: storkhead-box protein 2 isoform X2 [Megachile rotundata]	-	-	-	-	-	-	-
miR-15-x	8.84493	0.896433	-3.30258	0.000857024	Unigene0059837	43.144	962.985	4.48028	1.2634e-13	8.0854e-11	HexA	hexamerin II [Reticulitermes flavipes]	-	-	-	-	-	-	-
miR-15-x	8.84493	0.896433	-3.30258	0.000857024	Unigene0060331	3.341	8.79647	1.39664	1.3146e-06	0.000207373	--	Cyclin-dependent kinase inhibitor 1B [Lepeophtheirus salmonis]	-	-	-	-	-	-	-
miR-15-x	8.84493	0.896433	-3.30258	0.000857024	Unigene0060481	0.658467	6.1772	3.22977	0.000780973	0.0376363	--	AAEL010623-PA [Aedes aegypti]	-	-	-	-	-	-	-
miR-15-x	8.84493	0.896433	-3.30258	0.000857024	Unigene0062219	2.9216	29.3234	3.32722	0.000335228	0.0197924	--	LisH domain-containing protein ARMC9 [Zootermopsis nevadensis]	-	-	-	-	-	-	-
miR-15-x	8.84493	0.896433	-3.30258	0.000857024	Unigene0063308	1.4262	3.97167	1.47757	1.84668e-07	3.62628e-05	Vegfc	Platelet-derived growth factor subunit A [Zootermopsis nevadensis]	Environmental Information Processing	Signal transduction	ko04010//MAPK signaling pathway	K04359	-	-	-
miR-15-x	8.84493	0.896433	-3.30258	0.000857024	Unigene0063881	8.7265	24.622	1.49647	4.76389e-08	1.09963e-05	CYP4C1	Cytochrome P450 4C1 [Zootermopsis nevadensis]	-	-	-	-	-	-	-
miR-15-x	8.84493	0.896433	-3.30258	0.000857024	Unigene0064121	0.379367	1.09133	1.52443	0.000260329	0.0163056	CHIC2	PREDICTED: cysteine-rich hydrophobic domain-containing protein 2 [Neodiprion lecontei]	-	-	-	-	-	-	-
miR-15-x	8.84493	0.896433	-3.30258	0.000857024	Unigene0065114	2.15203	4.8902	1.18419	0.000106522	0.00809166	Sema5b	Semaphorin-5B [Zootermopsis nevadensis]	-	-	-	-	-	-	-
miR-15-x	8.84493	0.896433	-3.30258	0.000857024	Unigene0065387	26.3922	59.1841	1.1651	3.20548e-06	0.000455086	HSD17B13	Epidermal retinal dehydrogenase 2 [Zootermopsis nevadensis]	-	-	-	-	-	-	-
miR-15-x	8.84493	0.896433	-3.30258	0.000857024	Unigene0065410	11.3147	23.0624	1.02734	2.70927e-05	0.0027229	CdGAPr	PREDICTED: GTPase-activating protein CdGAPr isoform X1 [Cephus cinctus]	-	-	-	-	-	-	-
miR-15-x	8.84493	0.896433	-3.30258	0.000857024	Unigene0066235	2.0088	5.167	1.36299	5.9963e-06	0.000778793	--	Noggin-2 [Zootermopsis nevadensis]	Environmental Information Processing	Signal transduction	ko04350//TGF-beta signaling pathway	K04658	-	-	-
miR-15-x	8.84493	0.896433	-3.30258	0.000857024	Unigene0067549	4.38553	11.249	1.35897	7.44544e-08	1.63054e-05	KEAP1	Kelch-like ECH-associated protein 1 [Zootermopsis nevadensis]	Genetic Information Processing	Folding, sorting and degradation	ko04120//Ubiquitin mediated proteolysis	K10456	-	-	-
miR-15-x	8.84493	0.896433	-3.30258	0.000857024	Unigene0067793	4.89853	21.5688	2.13852	4.59066e-14	3.22168e-11	Suco	PREDICTED: SUN domain-containing ossification factor [Camponotus floridanus]	-	-	-	-	-	-	-
miR-15-x	8.84493	0.896433	-3.30258	0.000857024	Unigene0070119	5.61073	15.4143	1.45801	4.33319e-06	0.000585573	col2a1	PREDICTED: fibril-forming collagen alpha chain-like [Neodiprion lecontei]	Environmental Information Processing	Signaling molecules and interaction	ko04512//ECM-receptor interaction	K19719	-	-	-
miR-15-x	8.84493	0.896433	-3.30258	0.000857024	Unigene0070982	4.05897	10.3508	1.35056	3.45759e-07	6.31753e-05	RECK	Reversion-inducing cysteine-rich protein with Kazal motifs, partial [Zootermopsis nevadensis]	-	-	-	-	-	-	-
miR-15-x	8.84493	0.896433	-3.30258	0.000857024	Unigene0072081	1.0436	3.0214	1.53365	0.000536789	0.0283947	--	hypothetical protein L798_02999 [Zootermopsis nevadensis]	-	-	-	-	-	-	-
miR-15-x	8.84493	0.896433	-3.30258	0.000857024	Unigene0074297	0.619433	1.35083	1.12483	0.00115769	0.0498576	--	Retinoblastoma-like protein 2 [Zootermopsis nevadensis]	-	-	-	-	-	-	-
miR-15-x	8.84493	0.896433	-3.30258	0.000857024	Unigene0076182	48.9193	104.611	1.09656	3.4155e-05	0.00328555	Tret1	Solute carrier family 2, facilitated glucose transporter member 8 [Zootermopsis nevadensis]	-	-	-	-	GO:0016020//membrane	GO:0022857//transmembrane transporter activity	GO:0044765//single-organism transport
miR-15-x	8.84493	0.896433	-3.30258	0.000857024	Unigene0078221	25.8967	55.2942	1.09436	2.66681e-05	0.00269771	SmD3	Small nuclear ribonucleoprotein Sm D3 [Zootermopsis nevadensis]	Genetic Information Processing	Transcription	ko03040//Spliceosome	K11088	-	-	-
miR-15-x	8.84493	0.896433	-3.30258	0.000857024	Unigene0078289	41.5705	83.3943	1.00439	9.00602e-05	0.0071215	RNF31	RING finger protein 31 [Zootermopsis nevadensis]	-	-	-	-	-	-	-
miR-15-x	8.84493	0.896433	-3.30258	0.000857024	Unigene0082409	0.0573	0.791733	3.78841	8.43811e-08	1.81574e-05	--	AGAP011943-PA, partial [Anopheles gambiae str. PEST] [Anopheles gambiae]	-	-	-	-	-	-	-
miR-16-x	26.1957	2.88213	-3.18412	0.000647014	Unigene0001123	5.67737	12.3958	1.12656	1.29497e-05	0.00146876	--	endonuclease-reverse transcriptase [Blattella germanica]	-	-	-	-	-	-	-
miR-16-x	26.1957	2.88213	-3.18412	0.000647014	Unigene0001636	2.5542	6.38673	1.32221	1.60163e-07	3.18048e-05	hgh1	Brain protein 16 [Zootermopsis nevadensis]	-	-	-	-	-	-	-
miR-16-x	26.1957	2.88213	-3.18412	0.000647014	Unigene0001785	1.41493	3.6649	1.37304	1.20764e-05	0.00138885	--	Mite allergen Lep d 7 [Zootermopsis nevadensis]	-	-	-	-	-	-	-
miR-16-x	26.1957	2.88213	-3.18412	0.000647014	Unigene0003250	4.2621	8.88633	1.06002	2.69332e-05	0.00271564	Glra4	PREDICTED: glycine receptor subunit alpha-4 isoform X19 [Cimex lectularius]	-	-	-	-	-	-	-
miR-16-x	26.1957	2.88213	-3.18412	0.000647014	Unigene0003691	3.84043	9.05497	1.23744	1.01013e-06	0.000164166	GRIK2	PREDICTED: glutamate receptor ionotropic, kainate 2 isoform X2 [Tribolium castaneum]	-	-	-	-	GO:0031224//intrinsic component of membrane;GO:0097060//synaptic membrane	GO:0005231//excitatory extracellular ligand-gated ion channel activity	GO:0006811//ion transport;GO:0007215//glutamate receptor signaling pathway
miR-16-x	26.1957	2.88213	-3.18412	0.000647014	Unigene0004316	12.5618	38.4676	1.6146	3.15188e-09	9.36508e-07	ARL4C	ADP-ribosylation factor-like protein 4A [Zootermopsis nevadensis]	-	-	-	-	-	-	-
miR-16-x	26.1957	2.88213	-3.18412	0.000647014	Unigene0005998	5.99127	12.4726	1.05783	4.59602e-05	0.00417717	Nelf-E	Negative elongation factor E [Zootermopsis nevadensis]	-	-	-	-	-	GO:0008135//translation factor activity, RNA binding	GO:0034645//cellular macromolecule biosynthetic process
miR-16-x	26.1957	2.88213	-3.18412	0.000647014	Unigene0006524	6.25787	32.7384	2.38724	2.34088e-06	0.000347517	--	--	-	-	-	-	-	-	-
miR-16-x	26.1957	2.88213	-3.18412	0.000647014	Unigene0007263	5.3711	11.285	1.07111	7.99372e-05	0.00649142	per	Period circadian protein [Zootermopsis nevadensis]	Organismal Systems	Environmental adaptation	ko04711//Circadian rhythm - fly	K02633	-	-	-
miR-16-x	26.1957	2.88213	-3.18412	0.000647014	Unigene0008407	11.2096	23.1519	1.0464	3.46065e-05	0.00332191	--	obstructor B [Locusta migratoria]	-	-	-	-	-	GO:0043169//cation binding	-
miR-16-x	26.1957	2.88213	-3.18412	0.000647014	Unigene0010594	0.679033	1.55313	1.19363	0.00037792	0.021782	tll1	Dorsal-ventral patterning tolloid-like protein 1, partial [Zootermopsis nevadensis]	-	-	-	-	-	-	-
miR-16-x	26.1957	2.88213	-3.18412	0.000647014	Unigene0011525	14.6845	33.7571	1.20089	3.23821e-06	0.000458678	Zc2hc1b	PREDICTED: zinc finger C2HC domain-containing protein 1C-like [Aethina tumida]	-	-	-	-	-	-	-
miR-16-x	26.1957	2.88213	-3.18412	0.000647014	Unigene0013687	0.289267	1.05317	1.86426	4.05425e-05	0.00379652	--	PREDICTED: MLX-interacting protein isoform X2 [Cyphomyrmex costatus]	-	-	-	-	-	-	-
miR-16-x	26.1957	2.88213	-3.18412	0.000647014	Unigene0020303	0.441767	4.1329	3.2258	0.00038202	0.0219622	--	PREDICTED: LOW QUALITY PROTEIN: basic-leucine zipper transcription factor A-like [Apis mellifera]	-	-	-	-	-	-	-
miR-16-x	26.1957	2.88213	-3.18412	0.000647014	Unigene0035211	0.0263333	33.3717	10.3075	0.000228948	0.0148444	--	osiris 8 precursor [Nasonia vitripennis]	-	-	-	-	-	-	-
miR-16-x	26.1957	2.88213	-3.18412	0.000647014	Unigene0035706	1.6188	3.65663	1.17559	0.000568407	0.0296858	RpS14a	40S ribosomal protein S14 [Zootermopsis nevadensis]	Genetic Information Processing	Translation	ko03010//Ribosome	K02955	GO:0030529//intracellular ribonucleoprotein complex	-	GO:0010467//gene expression
miR-16-x	26.1957	2.88213	-3.18412	0.000647014	Unigene0040109	0.8119	1.666	1.03701	0.000993429	0.0443773	--	Rho GTPase-activating protein 11A [Zootermopsis nevadensis]	-	-	-	-	-	-	-
miR-16-x	26.1957	2.88213	-3.18412	0.000647014	Unigene0043439	3.3603	8.70217	1.37278	1.19533e-06	0.00019075	ski	Ski oncogene [Zootermopsis nevadensis]	-	-	-	-	-	-	-
miR-16-x	26.1957	2.88213	-3.18412	0.000647014	Unigene0045562	3.4092	13.1115	1.94332	6.45435e-12	3.25391e-09	Chac1	PREDICTED: glutathione-specific gamma-glutamylcyclotransferase 1 [Athalia rosae]	Metabolism	Global and overview maps;Metabolism of other amino acids	ko01100//Metabolic pathways;ko00480//Glutathione metabolism	K07232	-	-	-
miR-16-x	26.1957	2.88213	-3.18412	0.000647014	Unigene0046716	0.055	8.30053	7.23763	2.04891e-05	0.0021667	--	tudor and kh domain-containing protein, partial [Lasius niger]	-	-	-	-	-	-	-
miR-16-x	26.1957	2.88213	-3.18412	0.000647014	Unigene0047409	4.09213	8.36887	1.03218	5.81545e-05	0.00502305	Utp14b	U3 small nucleolar RNA-associated protein 14-like protein A [Zootermopsis nevadensis]	Genetic Information Processing	Translation	ko03008//Ribosome biogenesis in eukaryotes	K14567	-	-	-
miR-16-x	26.1957	2.88213	-3.18412	0.000647014	Unigene0047651	2.2342	4.7313	1.08248	0.000234263	0.0150703	--	hypothetical protein OCBIM_22037956mg, partial [Octopus bimaculoides]	-	-	-	-	-	-	-
miR-16-x	26.1957	2.88213	-3.18412	0.000647014	Unigene0048153	1.84653	3.99657	1.11394	0.000115047	0.00862675	--	PREDICTED: transcription factor Adf-1-like [Acyrthosiphon pisum]	-	-	-	-	-	-	-
miR-16-x	26.1957	2.88213	-3.18412	0.000647014	Unigene0048331	0.686367	1.79593	1.38768	0.000126944	0.00932191	--	conserved Plasmodium protein, unknown function [Plasmodium vivax]	-	-	-	-	-	-	-
miR-16-x	26.1957	2.88213	-3.18412	0.000647014	Unigene0048723	3.22943	6.8708	1.0892	1.84292e-05	0.00197938	Mblk-1	Mushroom body large-type Kenyon cell-specific protein 1 [Zootermopsis nevadensis]	Cellular Processes	Cell growth and death	ko04214//Apoptosis - fly	K20015	-	-	-
miR-16-x	26.1957	2.88213	-3.18412	0.000647014	Unigene0048910	4.5773	9.95963	1.1216	3.3284e-05	0.0032168	CG2614	Methyltransferase-like protein 13 [Zootermopsis nevadensis]	-	-	-	-	-	-	-
miR-16-x	26.1957	2.88213	-3.18412	0.000647014	Unigene0049561	3.12367	7.60997	1.28465	8.05426e-06	0.000994821	sgl	UDP-glucose 6-dehydrogenase [Zootermopsis nevadensis]	Metabolism	Global and overview maps;Carbohydrate metabolism	ko01100//Metabolic pathways;ko00040//Pentose and glucuronate interconversions ;ko00520//Amino sugar and nucleotide sugar metabolism ;ko00053//Ascorbate and aldarate metabolism	K00012	-	GO:0000166//nucleotide binding;GO:0016614//oxidoreductase activity, acting on CH-OH group of donors	GO:0044710//single-organism metabolic process
miR-16-x	26.1957	2.88213	-3.18412	0.000647014	Unigene0050175	3.78403	8.14507	1.106	0.000197017	0.0131514	rasl11b	Ras-like protein family member 11B [Zootermopsis nevadensis]	-	-	-	-	-	-	-
miR-16-x	26.1957	2.88213	-3.18412	0.000647014	Unigene0050357	0.0587	54.6264	9.86202	1.03391e-05	0.00121391	--	Postacrosomal sheath WW domain-binding protein [Melipona quadrifasciata]	-	-	-	-	-	-	-
miR-16-x	26.1957	2.88213	-3.18412	0.000647014	Unigene0050437	13.0072	42.7001	1.71492	3.617e-11	1.5842e-08	--	P-selectin [Zootermopsis nevadensis]	-	-	-	-	-	-	-
miR-16-x	26.1957	2.88213	-3.18412	0.000647014	Unigene0050707	5.36	39.7869	2.89199	2.2581e-21	4.35796e-18	Gadd45a	Growth arrest and DNA-damage-inducible protein GADD45 gamma [Zootermopsis nevadensis]	Environmental Information Processing	Signal transduction	ko04010//MAPK signaling pathway ;ko04068//FoxO signaling pathway	K04402	-	-	-
miR-16-x	26.1957	2.88213	-3.18412	0.000647014	Unigene0050825	1.92777	4.17357	1.11435	0.000189688	0.012761	Mcm6	DNA replication licensing factor Mcm6 [Zootermopsis nevadensis]	Genetic Information Processing	Replication and repair	ko03030//DNA replication	K02542	GO:0043231//intracellular membrane-bounded organelle;GO:0043234//protein complex	GO:0003676//nucleic acid binding;GO:0004386//helicase activity;GO:0032550//purine ribonucleoside binding	GO:0006259//DNA metabolic process;GO:0032392//DNA geometric change
miR-16-x	26.1957	2.88213	-3.18412	0.000647014	Unigene0051138	0.993567	2.36393	1.2505	1.00271e-05	0.00118614	p	PREDICTED: Hermansky-Pudlak syndrome 5 protein homolog [Ceratina calcarata]	-	-	-	-	-	-	-
miR-16-x	26.1957	2.88213	-3.18412	0.000647014	Unigene0051718	10.9301	28.9282	1.40417	1.10014e-07	2.29534e-05	ITIH4	PREDICTED: inter-alpha-trypsin inhibitor heavy chain H4-like [Halyomorpha halys]	-	-	-	-	-	-	-
miR-16-x	26.1957	2.88213	-3.18412	0.000647014	Unigene0051792	0.630433	1.39413	1.14495	9.34777e-05	0.0073196	B0563.6	PREDICTED: probable G-protein coupled receptor B0563.6 [Neodiprion lecontei]	-	-	-	-	-	-	-
miR-16-x	26.1957	2.88213	-3.18412	0.000647014	Unigene0051940	8.04857	17.3779	1.11045	3.13676e-05	0.00305068	nifk	MKI67 FHA domain-interacting nucleolar phosphoprotein-like [Zootermopsis nevadensis]	-	-	-	-	-	-	-
miR-16-x	26.1957	2.88213	-3.18412	0.000647014	Unigene0052303	8.92197	21.5162	1.26999	0.000410955	0.0231565	MMEL1	Membrane metallo-endopeptidase-like 1 [Zootermopsis nevadensis]	-	-	-	-	-	GO:0070011//peptidase activity, acting on L-amino acid peptides	GO:0019538//protein metabolic process
miR-16-x	26.1957	2.88213	-3.18412	0.000647014	Unigene0053292	0.4056	1.57917	1.96103	3.81735e-05	0.00361026	--	Myb/SANT-like transcription factor [Oryctes borbonicus]	-	-	-	-	-	-	-
miR-16-x	26.1957	2.88213	-3.18412	0.000647014	Unigene0053447	0.949033	2.21263	1.22123	0.00011429	0.00859196	pain	Transient receptor potential cation channel protein painless [Zootermopsis nevadensis]	-	-	-	-	-	-	-
miR-16-x	26.1957	2.88213	-3.18412	0.000647014	Unigene0053817	7.66773	15.7791	1.04115	6.88206e-05	0.00575998	SPON1	Spondin-1 [Zootermopsis nevadensis]	-	-	-	-	-	-	-
miR-16-x	26.1957	2.88213	-3.18412	0.000647014	Unigene0055083	0.5915	2.07997	1.81411	3.28271e-05	0.00318011	ALDH1A1	Retinal dehydrogenase 1 [Zootermopsis nevadensis]	Metabolism	Global and overview maps;Carbohydrate metabolism;Amino acid metabolism;Metabolism of terpenoids and polyketides;Lipid metabolism;Metabolism of other amino acids	ko01100//Metabolic pathways;ko00310//Lysine degradation ;ko00010//Glycolysis / Gluconeogenesis ;ko00561//Glycerolipid metabolism ;ko00620//Pyruvate metabolism ;ko00053//Ascorbate and aldarate metabolism ;ko00280//Valine, leucine and isoleucine degradation ;ko00071//Fatty acid degradation ;ko00981//Insect hormone biosynthesis ;ko00330//Arginine and proline metabolism ;ko00380//Tryptophan metabolis…	K00128	-	GO:0016903//oxidoreductase activity, acting on the aldehyde or oxo group of donors	GO:0044710//single-organism metabolic process
miR-16-x	26.1957	2.88213	-3.18412	0.000647014	Unigene0055459	1.01217	9.84203	3.28151	4.42427e-05	0.00405991	KLKB1	seminal fluid protein CSSFP033 [Chilo suppressalis]	-	-	-	-	-	-	-
miR-16-x	26.1957	2.88213	-3.18412	0.000647014	Unigene0055471	9.76947	21.0043	1.10433	4.37199e-05	0.00402089	PDPK1	3-phosphoinositide-dependent protein kinase 1 [Zootermopsis nevadensis]	Cellular Processes;Environmental Information Processing	Signal transduction;Transport and catabolism	ko04140//Autophagy - animal ;ko04150//mTOR signaling pathway ;ko04068//FoxO signaling pathway	K06276	-	GO:0004672//protein kinase activity	-
miR-16-x	26.1957	2.88213	-3.18412	0.000647014	Unigene0056327	1.6315	3.47177	1.08947	6.82871e-05	0.00572995	--	Unhealthy ribosome biogenesis protein 2-like protein [Zootermopsis nevadensis]	-	-	-	-	-	-	-
miR-16-x	26.1957	2.88213	-3.18412	0.000647014	Unigene0056734	16.4333	34.8725	1.08547	8.34645e-06	0.00102448	PSMA1	Proteasome subunit alpha type-1 [Zootermopsis nevadensis]	Genetic Information Processing	Folding, sorting and degradation	ko03050//Proteasome	K02725	-	-	-
miR-16-x	26.1957	2.88213	-3.18412	0.000647014	Unigene0057363	26.4465	81.4372	1.62261	1.01934e-10	4.02248e-08	--	PREDICTED: glycogenin-1 isoform X2 [Apis cerana]	Metabolism	Carbohydrate metabolism;Global and overview maps	ko01100//Metabolic pathways;ko00500//Starch and sucrose metabolism	K00750	-	-	-
miR-16-x	26.1957	2.88213	-3.18412	0.000647014	Unigene0057775	6.43987	14.5438	1.1753	5.83967e-06	0.00076246	--	PREDICTED: storkhead-box protein 2 isoform X2 [Megachile rotundata]	-	-	-	-	-	-	-
miR-16-x	26.1957	2.88213	-3.18412	0.000647014	Unigene0059837	43.144	962.985	4.48028	1.2634e-13	8.0854e-11	HexA	hexamerin II [Reticulitermes flavipes]	-	-	-	-	-	-	-
miR-16-x	26.1957	2.88213	-3.18412	0.000647014	Unigene0060331	3.341	8.79647	1.39664	1.3146e-06	0.000207373	--	Cyclin-dependent kinase inhibitor 1B [Lepeophtheirus salmonis]	-	-	-	-	-	-	-
miR-16-x	26.1957	2.88213	-3.18412	0.000647014	Unigene0060481	0.658467	6.1772	3.22977	0.000780973	0.0376363	--	AAEL010623-PA [Aedes aegypti]	-	-	-	-	-	-	-
miR-16-x	26.1957	2.88213	-3.18412	0.000647014	Unigene0062877	9.78077	24.7357	1.33858	2.43455e-05	0.00251214	--	seminal fluid protein [Nilaparvata lugens]	-	-	-	-	-	-	-
miR-16-x	26.1957	2.88213	-3.18412	0.000647014	Unigene0063308	1.4262	3.97167	1.47757	1.84668e-07	3.62628e-05	Vegfc	Platelet-derived growth factor subunit A [Zootermopsis nevadensis]	Environmental Information Processing	Signal transduction	ko04010//MAPK signaling pathway	K04359	-	-	-
miR-16-x	26.1957	2.88213	-3.18412	0.000647014	Unigene0063881	8.7265	24.622	1.49647	4.76389e-08	1.09963e-05	CYP4C1	Cytochrome P450 4C1 [Zootermopsis nevadensis]	-	-	-	-	-	-	-
miR-16-x	26.1957	2.88213	-3.18412	0.000647014	Unigene0064121	0.379367	1.09133	1.52443	0.000260329	0.0163056	CHIC2	PREDICTED: cysteine-rich hydrophobic domain-containing protein 2 [Neodiprion lecontei]	-	-	-	-	-	-	-
miR-16-x	26.1957	2.88213	-3.18412	0.000647014	Unigene0065114	2.15203	4.8902	1.18419	0.000106522	0.00809166	Sema5b	Semaphorin-5B [Zootermopsis nevadensis]	-	-	-	-	-	-	-
miR-16-x	26.1957	2.88213	-3.18412	0.000647014	Unigene0066235	2.0088	5.167	1.36299	5.9963e-06	0.000778793	--	Noggin-2 [Zootermopsis nevadensis]	Environmental Information Processing	Signal transduction	ko04350//TGF-beta signaling pathway	K04658	-	-	-
miR-16-x	26.1957	2.88213	-3.18412	0.000647014	Unigene0067793	4.89853	21.5688	2.13852	4.59066e-14	3.22168e-11	Suco	PREDICTED: SUN domain-containing ossification factor [Camponotus floridanus]	-	-	-	-	-	-	-
miR-16-x	26.1957	2.88213	-3.18412	0.000647014	Unigene0070119	5.61073	15.4143	1.45801	4.33319e-06	0.000585573	col2a1	PREDICTED: fibril-forming collagen alpha chain-like [Neodiprion lecontei]	Environmental Information Processing	Signaling molecules and interaction	ko04512//ECM-receptor interaction	K19719	-	-	-
miR-16-x	26.1957	2.88213	-3.18412	0.000647014	Unigene0070982	4.05897	10.3508	1.35056	3.45759e-07	6.31753e-05	RECK	Reversion-inducing cysteine-rich protein with Kazal motifs, partial [Zootermopsis nevadensis]	-	-	-	-	-	-	-
miR-16-x	26.1957	2.88213	-3.18412	0.000647014	Unigene0072081	1.0436	3.0214	1.53365	0.000536789	0.0283947	--	hypothetical protein L798_02999 [Zootermopsis nevadensis]	-	-	-	-	-	-	-
miR-16-x	26.1957	2.88213	-3.18412	0.000647014	Unigene0072595	4.10717	10.4111	1.34191	0.000149475	0.0106167	IL16	Pro-interleukin-16 [Zootermopsis nevadensis]	-	-	-	-	-	-	-
miR-16-x	26.1957	2.88213	-3.18412	0.000647014	Unigene0072690	26.3386	74.9158	1.50809	9.87941e-10	3.24536e-07	Tret1	Sugar transporter ERD6-like 4 [Zootermopsis nevadensis]	-	-	-	-	-	-	-
miR-16-x	26.1957	2.88213	-3.18412	0.000647014	Unigene0074297	0.619433	1.35083	1.12483	0.00115769	0.0498576	--	Retinoblastoma-like protein 2 [Zootermopsis nevadensis]	-	-	-	-	-	-	-
miR-16-x	26.1957	2.88213	-3.18412	0.000647014	Unigene0075099	0.375067	1.11033	1.56577	0.000432056	0.0240819	--	Transposable element Tc3 transposase, partial [Anoplophora glabripennis]	-	-	-	-	-	-	-
miR-16-x	26.1957	2.88213	-3.18412	0.000647014	Unigene0076182	48.9193	104.611	1.09656	3.4155e-05	0.00328555	Tret1	Solute carrier family 2, facilitated glucose transporter member 8 [Zootermopsis nevadensis]	-	-	-	-	GO:0016020//membrane	GO:0022857//transmembrane transporter activity	GO:0044765//single-organism transport
miR-16-x	26.1957	2.88213	-3.18412	0.000647014	Unigene0078221	25.8967	55.2942	1.09436	2.66681e-05	0.00269771	SmD3	Small nuclear ribonucleoprotein Sm D3 [Zootermopsis nevadensis]	Genetic Information Processing	Transcription	ko03040//Spliceosome	K11088	-	-	-
miR-16-x	26.1957	2.88213	-3.18412	0.000647014	Unigene0078289	41.5705	83.3943	1.00439	9.00602e-05	0.0071215	RNF31	RING finger protein 31 [Zootermopsis nevadensis]	-	-	-	-	-	-	-
miR-16-y	1.099	0.01	-6.78005	0.00397889	Unigene0001082	5.81447	12.1796	1.06675	6.04212e-05	0.00518619	Usp45	Ubiquitin carboxyl-terminal hydrolase 16, partial [Zootermopsis nevadensis]	-	-	-	-	-	-	-
miR-16-y	1.099	0.01	-6.78005	0.00397889	Unigene0003250	4.2621	8.88633	1.06002	2.69332e-05	0.00271564	Glra4	PREDICTED: glycine receptor subunit alpha-4 isoform X19 [Cimex lectularius]	-	-	-	-	-	-	-
miR-16-y	1.099	0.01	-6.78005	0.00397889	Unigene0004647	1.9383	4.01037	1.04894	0.000118767	0.0088584	iHog	Interference hedgehog [Zootermopsis nevadensis]	Environmental Information Processing	Signal transduction	ko04341//Hedgehog signaling pathway - fly	K20245	-	-	-
miR-16-y	1.099	0.01	-6.78005	0.00397889	Unigene0004749	6.82943	14.5877	1.09491	8.03722e-06	0.000993711	dan	Protein distal antenna [Zootermopsis nevadensis]	-	-	-	-	-	-	-
miR-16-y	1.099	0.01	-6.78005	0.00397889	Unigene0009910	4.0007	11.6246	1.53885	1.17318e-06	0.000187702	--	Retrovirus-related Pol polyprotein from type-2 retrotransposable element R2DM [Exaiptasia pallida]	-	-	-	-	-	-	-
miR-16-y	1.099	0.01	-6.78005	0.00397889	Unigene0010218	8.75863	29.2191	1.73814	1.7717e-11	8.2891e-09	cdo1	Cysteine dioxygenase type 1 [Zootermopsis nevadensis]	Metabolism	Amino acid metabolism;Global and overview maps;Metabolism of other amino acids	ko01100//Metabolic pathways;ko00270//Cysteine and methionine metabolism ;ko00430//Taurine and hypotaurine metabolism	K00456	-	-	GO:0044710//single-organism metabolic process
miR-16-y	1.099	0.01	-6.78005	0.00397889	Unigene0015824	1.5256	3.11297	1.02891	0.000572294	0.029788	--	Leucine-rich repeat-containing protein [Zootermopsis nevadensis]	-	-	-	-	-	-	-
miR-16-y	1.099	0.01	-6.78005	0.00397889	Unigene0045529	0.3205	4.92387	3.9414	2.876e-18	3.77903e-15	--	PREDICTED: mucin-5AC [Bemisia tabaci]	-	-	-	-	-	-	-
miR-16-y	1.099	0.01	-6.78005	0.00397889	Unigene0047409	4.09213	8.36887	1.03218	5.81545e-05	0.00502305	Utp14b	U3 small nucleolar RNA-associated protein 14-like protein A [Zootermopsis nevadensis]	Genetic Information Processing	Translation	ko03008//Ribosome biogenesis in eukaryotes	K14567	-	-	-
miR-16-y	1.099	0.01	-6.78005	0.00397889	Unigene0047554	0.1097	0.5279	2.2667	0.000174771	0.0119462	--	hypothetical protein L798_11710 [Zootermopsis nevadensis]	-	-	-	-	-	-	-
miR-16-y	1.099	0.01	-6.78005	0.00397889	Unigene0048153	1.84653	3.99657	1.11394	0.000115047	0.00862675	--	PREDICTED: transcription factor Adf-1-like [Acyrthosiphon pisum]	-	-	-	-	-	-	-
miR-16-y	1.099	0.01	-6.78005	0.00397889	Unigene0049612	6.97003	39.4536	2.50092	8.99204e-18	1.12187e-14	--	Transcriptional regulator ICP4 domain-containing protein [Daphnia magna]	-	-	-	-	-	-	-
miR-16-y	1.099	0.01	-6.78005	0.00397889	Unigene0051008	2.72877	5.85103	1.10044	7.71335e-05	0.00633875	CG11583	Brix domain-containing protein 2-like protein [Zootermopsis nevadensis]	-	-	-	-	-	-	-
miR-16-y	1.099	0.01	-6.78005	0.00397889	Unigene0051074	8.0671	27.1598	1.75135	7.38522e-09	2.03159e-06	--	Solute carrier family 2, facilitated glucose transporter member 6, partial [Zootermopsis nevadensis]	-	-	-	-	-	-	-
miR-16-y	1.099	0.01	-6.78005	0.00397889	Unigene0051583	4.65023	10.2546	1.14089	8.57601e-06	0.00104464	mybbp1a	DNA polymerase V [Zootermopsis nevadensis]	-	-	-	-	-	-	-
miR-16-y	1.099	0.01	-6.78005	0.00397889	Unigene0052207	6.2589	20.5978	1.71851	7.44855e-11	3.02634e-08	AGPAT1	1-acyl-sn-glycerol-3-phosphate acyltransferase alpha [Zootermopsis nevadensis]	Metabolism	Lipid metabolism;Global and overview maps	ko01100//Metabolic pathways;ko00564//Glycerophospholipid metabolism ;ko00561//Glycerolipid metabolism	K13509	-	GO:0016740//transferase activity	GO:0006629//lipid metabolic process
miR-16-y	1.099	0.01	-6.78005	0.00397889	Unigene0052303	8.92197	21.5162	1.26999	0.000410955	0.0231565	MMEL1	Membrane metallo-endopeptidase-like 1 [Zootermopsis nevadensis]	-	-	-	-	-	GO:0070011//peptidase activity, acting on L-amino acid peptides	GO:0019538//protein metabolic process
miR-16-y	1.099	0.01	-6.78005	0.00397889	Unigene0052459	3.91307	8.19233	1.06597	5.13818e-05	0.00455267	CG9246	Nucleolar complex protein 2-like protein [Zootermopsis nevadensis]	-	-	-	-	-	-	-
miR-16-y	1.099	0.01	-6.78005	0.00397889	Unigene0057020	42.3286	89.9525	1.08753	1.28813e-05	0.00146639	--	PREDICTED: ras guanine nucleotide exchange factor P-like [Diaphorina citri]	-	-	-	-	-	-	-
miR-16-y	1.099	0.01	-6.78005	0.00397889	Unigene0057363	26.4465	81.4372	1.62261	1.01934e-10	4.02248e-08	--	PREDICTED: glycogenin-1 isoform X2 [Apis cerana]	Metabolism	Carbohydrate metabolism;Global and overview maps	ko01100//Metabolic pathways;ko00500//Starch and sucrose metabolism	K00750	-	-	-
miR-16-y	1.099	0.01	-6.78005	0.00397889	Unigene0071775	3.6217	8.29333	1.19529	3.26064e-06	0.000461326	mlec	Malectin-B [Zootermopsis nevadensis]	-	-	-	-	-	-	-
miR-16-y	1.099	0.01	-6.78005	0.00397889	Unigene0072595	4.10717	10.4111	1.34191	0.000149475	0.0106167	IL16	Pro-interleukin-16 [Zootermopsis nevadensis]	-	-	-	-	-	-	-
miR-16-y	1.099	0.01	-6.78005	0.00397889	Unigene0072690	26.3386	74.9158	1.50809	9.87941e-10	3.24536e-07	Tret1	Sugar transporter ERD6-like 4 [Zootermopsis nevadensis]	-	-	-	-	-	-	-
miR-16-y	1.099	0.01	-6.78005	0.00397889	Unigene0073006	2.74763	7.4787	1.4446	1.06588e-07	2.2314e-05	pigw	GPI-anchored wall transfer protein 1 [Culex quinquefasciatus]	Metabolism	Glycan biosynthesis and metabolism;Global and overview maps	ko01100//Metabolic pathways;ko00563//Glycosylphosphatidylinositol(GPI)-anchor biosynthesis	K05283	-	-	-
miR-16-y	1.099	0.01	-6.78005	0.00397889	Unigene0073280	14.5252	43.0512	1.5675	3.47353e-09	1.01908e-06	Sik2	Serine/threonine-protein kinase SIK2 [Zootermopsis nevadensis]	-	-	-	-	-	-	-
miR-16-y	1.099	0.01	-6.78005	0.00397889	Unigene0074012	324.781	1471.75	2.17999	1.69605e-14	1.29313e-11	--	Leucine-rich repeat-containing protein 20 [Zootermopsis nevadensis]	-	-	-	-	-	-	-
miR-181-x	127.327	11.5035	-3.46839	0.000954441	Unigene0001123	5.67737	12.3958	1.12656	1.29497e-05	0.00146876	--	endonuclease-reverse transcriptase [Blattella germanica]	-	-	-	-	-	-	-
miR-181-x	127.327	11.5035	-3.46839	0.000954441	Unigene0001636	2.5542	6.38673	1.32221	1.60163e-07	3.18048e-05	hgh1	Brain protein 16 [Zootermopsis nevadensis]	-	-	-	-	-	-	-
miR-181-x	127.327	11.5035	-3.46839	0.000954441	Unigene0001703	1.36947	3.38927	1.30736	2.64405e-05	0.00267908	--	Apolipoprotein D [Zootermopsis nevadensis]	-	-	-	-	-	-	-
miR-181-x	127.327	11.5035	-3.46839	0.000954441	Unigene0003250	4.2621	8.88633	1.06002	2.69332e-05	0.00271564	Glra4	PREDICTED: glycine receptor subunit alpha-4 isoform X19 [Cimex lectularius]	-	-	-	-	-	-	-
miR-181-x	127.327	11.5035	-3.46839	0.000954441	Unigene0003691	3.84043	9.05497	1.23744	1.01013e-06	0.000164166	GRIK2	PREDICTED: glutamate receptor ionotropic, kainate 2 isoform X2 [Tribolium castaneum]	-	-	-	-	GO:0031224//intrinsic component of membrane;GO:0097060//synaptic membrane	GO:0005231//excitatory extracellular ligand-gated ion channel activity	GO:0006811//ion transport;GO:0007215//glutamate receptor signaling pathway
miR-181-x	127.327	11.5035	-3.46839	0.000954441	Unigene0004316	12.5618	38.4676	1.6146	3.15188e-09	9.36508e-07	ARL4C	ADP-ribosylation factor-like protein 4A [Zootermopsis nevadensis]	-	-	-	-	-	-	-
miR-181-x	127.327	11.5035	-3.46839	0.000954441	Unigene0004647	1.9383	4.01037	1.04894	0.000118767	0.0088584	iHog	Interference hedgehog [Zootermopsis nevadensis]	Environmental Information Processing	Signal transduction	ko04341//Hedgehog signaling pathway - fly	K20245	-	-	-
miR-181-x	127.327	11.5035	-3.46839	0.000954441	Unigene0004696	3.11633	6.3693	1.03129	8.68489e-05	0.00690737	bwa	Alkaline ceramidase [Zootermopsis nevadensis]	Metabolism	Lipid metabolism;Global and overview maps	ko01100//Metabolic pathways;ko00600//Sphingolipid metabolism	K01441	GO:0031224//intrinsic component of membrane	GO:0016810//hydrolase activity, acting on carbon-nitrogen (but not peptide) bonds	-
miR-181-x	127.327	11.5035	-3.46839	0.000954441	Unigene0004749	6.82943	14.5877	1.09491	8.03722e-06	0.000993711	dan	Protein distal antenna [Zootermopsis nevadensis]	-	-	-	-	-	-	-
miR-181-x	127.327	11.5035	-3.46839	0.000954441	Unigene0004792	56.0035	191.945	1.77711	1.27667e-12	7.24518e-10	FAM184A	Protein FAM184A, partial [Exaiptasia pallida]	-	-	-	-	-	-	-
miR-181-x	127.327	11.5035	-3.46839	0.000954441	Unigene0005195	186.44	495.912	1.41138	3.41216e-05	0.00328491	PebIII	ejaculatory bulb-specific protein III [Coptotermes formosanus]	-	-	-	-	-	-	-
miR-181-x	127.327	11.5035	-3.46839	0.000954441	Unigene0006524	6.25787	32.7384	2.38724	2.34088e-06	0.000347517	--	--	-	-	-	-	-	-	-
miR-181-x	127.327	11.5035	-3.46839	0.000954441	Unigene0008233	1.27913	2.95137	1.20622	6.01322e-05	0.00516497	NLK	nemo-like protein [Nilaparvata lugens]	Environmental Information Processing	Signal transduction	ko04010//MAPK signaling pathway ;ko04310//Wnt signaling pathway ;ko04068//FoxO signaling pathway	K04468	-	GO:0004702//receptor signaling protein serine/threonine kinase activity;GO:0032550//purine ribonucleoside binding	GO:0006464//cellular protein modification process;GO:0006796//phosphate-containing compound metabolic process
miR-181-x	127.327	11.5035	-3.46839	0.000954441	Unigene0008794	17.8669	45.042	1.33398	1.5934e-06	0.000246011	--	PREDICTED: paternally-expressed gene 3 protein-like [Hyalella azteca]	-	-	-	-	-	-	-
miR-181-x	127.327	11.5035	-3.46839	0.000954441	Unigene0009285	15.544	34.3232	1.14282	1.26107e-05	0.00143824	--	--	Environmental Information Processing	Signal transduction	ko04310//Wnt signaling pathway	K19882	-	-	-
miR-181-x	127.327	11.5035	-3.46839	0.000954441	Unigene0009649	3.8832	8.68497	1.16127	1.74338e-05	0.00188228	--	PREDICTED: MATH and LRR domain-containing protein PFE0570w-like [Camponotus floridanus]	-	-	-	-	-	-	-
miR-181-x	127.327	11.5035	-3.46839	0.000954441	Unigene0010072	12.7435	26.7263	1.06849	3.45115e-05	0.00331726	ZFAND6	PREDICTED: mucin-3A isoform X2 [Acyrthosiphon pisum]	-	-	-	-	-	-	-
miR-181-x	127.327	11.5035	-3.46839	0.000954441	Unigene0011328	6.8301	16.0096	1.22896	4.06453e-06	0.000557811	HMT-2	Homocysteine S-methyltransferase 2 [Zootermopsis nevadensis]	Metabolism	Amino acid metabolism;Global and overview maps	ko01100//Metabolic pathways;ko00270//Cysteine and methionine metabolism	K00547	-	-	-
miR-181-x	127.327	11.5035	-3.46839	0.000954441	Unigene0011460	4.35247	10.3797	1.25386	3.05522e-06	0.000438288	mex3b	RNA-binding protein MEX3B [Zootermopsis nevadensis]	-	-	-	-	-	-	-
miR-181-x	127.327	11.5035	-3.46839	0.000954441	Unigene0011525	14.6845	33.7571	1.20089	3.23821e-06	0.000458678	Zc2hc1b	PREDICTED: zinc finger C2HC domain-containing protein 1C-like [Aethina tumida]	-	-	-	-	-	-	-
miR-181-x	127.327	11.5035	-3.46839	0.000954441	Unigene0011672	7.05787	42.5005	2.59018	5.45781e-10	1.86737e-07	TLL1	Dorsal-ventral patterning tolloid-like protein 1, partial [Zootermopsis nevadensis]	-	-	-	-	-	-	-
miR-181-x	127.327	11.5035	-3.46839	0.000954441	Unigene0011775	5.37433	18.1411	1.7551	1.50722e-11	7.24373e-09	--	GM16903 [Drosophila sechellia]	-	-	-	-	-	-	-
miR-181-x	127.327	11.5035	-3.46839	0.000954441	Unigene0012084	28.6023	80.772	1.49772	6.25142e-09	1.75089e-06	slc36a4	PREDICTED: proton-coupled amino acid transporter 1-like isoform X3 [Halyomorpha halys]	-	-	-	-	-	-	-
miR-181-x	127.327	11.5035	-3.46839	0.000954441	Unigene0012792	20.1013	41.4215	1.04309	2.04117e-05	0.00216196	zip	PREDICTED: myosin heavy chain, non-muscle [Cephus cinctus]	-	-	-	-	-	-	-
miR-181-x	127.327	11.5035	-3.46839	0.000954441	Unigene0013035	0.214833	0.913067	2.0875	3.04329e-05	0.00298327	--	PiggyBac transposable element-derived protein 4, partial [Stegodyphus mimosarum]	-	-	-	-	-	-	-
miR-181-x	127.327	11.5035	-3.46839	0.000954441	Unigene0013587	3.1894	10.5935	1.73182	2.49757e-11	1.12999e-08	--	Peptidyl-prolyl cis-trans isomerase SDCCAG10, partial [Zootermopsis nevadensis]	-	-	-	-	-	-	-
miR-181-x	127.327	11.5035	-3.46839	0.000954441	Unigene0013597	0.370067	1.08667	1.55405	0.000872241	0.040502	--	DDE superfamily endonuclease [Nuttalliella namaqua]	-	-	-	-	-	-	-
miR-181-x	127.327	11.5035	-3.46839	0.000954441	Unigene0013634	0.127233	17.1231	7.07233	7.34666e-05	0.00610237	--	osiris 19 precursor [Bombyx mori]	-	-	-	-	-	-	-
miR-181-x	127.327	11.5035	-3.46839	0.000954441	Unigene0013754	3.24617	8.3187	1.35762	2.34253e-07	4.41737e-05	Lrrc47	Leucine-rich repeat-containing protein 47 [Zootermopsis nevadensis]	-	-	-	-	-	-	-
miR-181-x	127.327	11.5035	-3.46839	0.000954441	Unigene0013956	0.2329	3.49627	3.90803	2.80967e-13	1.70116e-10	Pxt	PREDICTED: chorion peroxidase [Neodiprion lecontei]	-	-	-	-	-	GO:0003824//catalytic activity;GO:0046906//tetrapyrrole binding	GO:0006950//response to stress;GO:0044710//single-organism metabolic process
miR-181-x	127.327	11.5035	-3.46839	0.000954441	Unigene0013982	20.6721	67.1745	1.70023	3.50716e-10	1.23768e-07	BNIP3	BCL2/adenovirus E1B 19 kDa protein-interacting protein 3-like [Zootermopsis nevadensis]	Cellular Processes;Environmental Information Processing	Signal transduction;Transport and catabolism	ko04140//Autophagy - animal ;ko04068//FoxO signaling pathway ;ko04137//Mitophagy - animal	K15464	GO:0031224//intrinsic component of membrane	-	GO:0042981//regulation of apoptotic process
miR-181-x	127.327	11.5035	-3.46839	0.000954441	Unigene0014173	0.0899333	2.1223	4.56063	0.000111766	0.00842783	--	Leucine-rich repeat neuronal protein 2 [Zootermopsis nevadensis]	-	-	-	-	-	-	-
miR-181-x	127.327	11.5035	-3.46839	0.000954441	Unigene0014529	0.0441333	12.0016	8.08714	1.72977e-05	0.00187184	LysP	C-type lysozyme-3 [Coptotermes formosanus]	-	-	-	-	-	-	-
miR-181-x	127.327	11.5035	-3.46839	0.000954441	Unigene0014554	9.1624	18.3996	1.00588	7.77433e-05	0.00638038	DARS	Aspartyl-tRNA synthetase, cytoplasmic [Zootermopsis nevadensis]	Genetic Information Processing	Translation	ko00970//Aminoacyl-tRNA biosynthesis	K22503	GO:0044424//intracellular part	GO:0004812//aminoacyl-tRNA ligase activity;GO:0032550//purine ribonucleoside binding	GO:0006418//tRNA aminoacylation for protein translation
miR-181-x	127.327	11.5035	-3.46839	0.000954441	Unigene0016188	7.0632	22.7924	1.69016	1.39506e-10	5.3347e-08	Ltv1	LTV1-like protein [Zootermopsis nevadensis]	-	-	-	-	-	-	-
miR-181-x	127.327	11.5035	-3.46839	0.000954441	Unigene0035117	0.5986	1.2915	1.10938	0.000833385	0.0393334	CDC7	Cell division cycle 7-related protein kinase [Zootermopsis nevadensis]	-	-	-	-	-	-	-
miR-181-x	127.327	11.5035	-3.46839	0.000954441	Unigene0039539	0.027	2.6538	6.61896	0.000663844	0.0332501	ACP20	PREDICTED: cuticle protein 19-like [Cimex lectularius]	-	-	-	-	-	-	-
miR-181-x	127.327	11.5035	-3.46839	0.000954441	Unigene0041366	1.431	14.6377	3.35459	0.000115273	0.00862903	AGAP007347	C-type lysozyme-3 [Coptotermes formosanus]	-	-	-	-	-	-	-
miR-181-x	127.327	11.5035	-3.46839	0.000954441	Unigene0041390	3.8005	12.6658	1.73668	1.70378e-09	5.39597e-07	--	Myc protein [Zootermopsis nevadensis]	Environmental Information Processing	Signal transduction	ko04010//MAPK signaling pathway ;ko04310//Wnt signaling pathway ;ko04391//Hippo signaling pathway -fly ;ko04350//TGF-beta signaling pathway ;ko04012//ErbB signaling pathway	K04377	-	-	-
miR-181-x	127.327	11.5035	-3.46839	0.000954441	Unigene0043060	0.402867	9.4198	4.54732	0.000237044	0.0152175	--	Neurofilament heavy polypeptide [Zootermopsis nevadensis]	-	-	-	-	-	-	-
miR-181-x	127.327	11.5035	-3.46839	0.000954441	Unigene0044789	0.495133	1.64337	1.73077	0.000226697	0.0147216	--	Mite allergen Lep d 7 [Zootermopsis nevadensis]	-	-	-	-	-	-	-
miR-181-x	127.327	11.5035	-3.46839	0.000954441	Unigene0045063	6.5793	13.8842	1.07743	8.14981e-05	0.00658905	--	Growth factor receptor-bound protein 2 [Zootermopsis nevadensis]	-	-	-	-	-	-	-
miR-181-x	127.327	11.5035	-3.46839	0.000954441	Unigene0045529	0.3205	4.92387	3.9414	2.876e-18	3.77903e-15	--	PREDICTED: mucin-5AC [Bemisia tabaci]	-	-	-	-	-	-	-
miR-181-x	127.327	11.5035	-3.46839	0.000954441	Unigene0046199	22.2273	64.0992	1.52798	1.63689e-08	4.30171e-06	--	protein phum phum308880 pediculus us corporis, partial [Nyssomyia neivai]	Environmental Information Processing	Signal transduction	ko04310//Wnt signaling pathway	K03096	-	-	-
miR-181-x	127.327	11.5035	-3.46839	0.000954441	Unigene0046531	0.891467	2.10527	1.23975	0.000559036	0.0293328	--	histone-lysine n-methyltransferase setmar-like protein [Lasius niger]	-	-	-	-	-	-	-
miR-181-x	127.327	11.5035	-3.46839	0.000954441	Unigene0046825	18.1032	43.5442	1.26623	0.000170324	0.0117594	Spon1	PREDICTED: somatomedin-B and thrombospondin type-1 domain-containing protein [Acyrthosiphon pisum]	-	-	-	-	-	-	-
miR-181-x	127.327	11.5035	-3.46839	0.000954441	Unigene0047159	5.29713	11.0784	1.06447	4.61442e-05	0.00419081	--	Clarin-3 [Zootermopsis nevadensis]	-	-	-	-	-	-	-
miR-181-x	127.327	11.5035	-3.46839	0.000954441	Unigene0047409	4.09213	8.36887	1.03218	5.81545e-05	0.00502305	Utp14b	U3 small nucleolar RNA-associated protein 14-like protein A [Zootermopsis nevadensis]	Genetic Information Processing	Translation	ko03008//Ribosome biogenesis in eukaryotes	K14567	-	-	-
miR-181-x	127.327	11.5035	-3.46839	0.000954441	Unigene0048643	41.8092	99.3696	1.24898	6.15812e-07	0.000105349	Inx3	PREDICTED: innexin inx3 [Papilio polytes]	-	-	-	-	GO:0031224//intrinsic component of membrane	-	GO:0044765//single-organism transport
miR-181-x	127.327	11.5035	-3.46839	0.000954441	Unigene0048723	3.22943	6.8708	1.0892	1.84292e-05	0.00197938	Mblk-1	Mushroom body large-type Kenyon cell-specific protein 1 [Zootermopsis nevadensis]	Cellular Processes	Cell growth and death	ko04214//Apoptosis - fly	K20015	-	-	-
miR-181-x	127.327	11.5035	-3.46839	0.000954441	Unigene0048907	3.9191	7.95227	1.02084	7.75583e-05	0.00636943	Taf6	Transcription initiation factor TFIID subunit 6 [Zootermopsis nevadensis]	Genetic Information Processing	Transcription	ko03022//Basal transcription factors	K03131	-	-	-
miR-181-x	127.327	11.5035	-3.46839	0.000954441	Unigene0048987	0.934533	2.4691	1.40167	9.73922e-06	0.0011589	CG7708	High-affinity choline transporter 1 [Zootermopsis nevadensis]	-	-	-	-	-	-	-
miR-181-x	127.327	11.5035	-3.46839	0.000954441	Unigene0048996	14.4499	32.2593	1.15865	1.78378e-05	0.00192423	Spec2	CDC42 small effector protein-like protein [Zootermopsis nevadensis]	-	-	-	-	-	-	-
miR-181-x	127.327	11.5035	-3.46839	0.000954441	Unigene0049347	10.2171	25.5257	1.32096	1.2343e-07	2.51576e-05	PSMC4	26S protease regulatory subunit 6B [Zootermopsis nevadensis]	Genetic Information Processing	Folding, sorting and degradation	ko03050//Proteasome	K03063	GO:0044424//intracellular part	GO:0032550//purine ribonucleoside binding;GO:0042623//ATPase activity, coupled	GO:0009057//macromolecule catabolic process;GO:0019538//protein metabolic process
miR-181-x	127.327	11.5035	-3.46839	0.000954441	Unigene0049397	0.444733	2.93903	2.72433	1.23264e-11	6.01778e-09	B1	carboxylesterase [Oxya chinensis]	Metabolism	Xenobiotics biodegradation and metabolism	ko00983//Drug metabolism - other enzymes	K03927	-	-	-
miR-181-x	127.327	11.5035	-3.46839	0.000954441	Unigene0049561	3.12367	7.60997	1.28465	8.05426e-06	0.000994821	sgl	UDP-glucose 6-dehydrogenase [Zootermopsis nevadensis]	Metabolism	Global and overview maps;Carbohydrate metabolism	ko01100//Metabolic pathways;ko00040//Pentose and glucuronate interconversions ;ko00520//Amino sugar and nucleotide sugar metabolism ;ko00053//Ascorbate and aldarate metabolism	K00012	-	GO:0000166//nucleotide binding;GO:0016614//oxidoreductase activity, acting on CH-OH group of donors	GO:0044710//single-organism metabolic process
miR-181-x	127.327	11.5035	-3.46839	0.000954441	Unigene0049610	0.0826	16.9744	7.68301	4.01104e-06	0.000551083	D11DS	PREDICTED: acyl-CoA Delta(11) desaturase-like [Copidosoma floridanum]	Metabolism;Organismal Systems	Lipid metabolism;Aging;Global and overview maps	ko04212//Longevity regulating pathway - worm ;ko01212//Fatty acid metabolism;ko01040//Biosynthesis of unsaturated fatty acids	K00507	-	GO:0016491//oxidoreductase activity	GO:0044710//single-organism metabolic process
miR-181-x	127.327	11.5035	-3.46839	0.000954441	Unigene0049615	7.00513	14.7307	1.07234	5.71811e-05	0.00496229	ABCE1	ATP-binding cassette sub-family E member 1 [Zootermopsis nevadensis]	-	-	-	-	-	GO:0005488//binding;GO:0017111//nucleoside-triphosphatase activity	GO:0044765//single-organism transport
miR-181-x	127.327	11.5035	-3.46839	0.000954441	Unigene0049970	3.90623	13.1317	1.74921	5.24015e-07	9.14177e-05	ACHE1	Esterase FE4 [Zootermopsis nevadensis]	Metabolism	Metabolism of terpenoids and polyketides	ko00981//Insect hormone biosynthesis	K01063	-	-	-
miR-181-x	127.327	11.5035	-3.46839	0.000954441	Unigene0050100	3.063	26.2877	3.10137	8.28191e-05	0.00666514	--	chemosensory protein [Blattella germanica]	-	-	-	-	-	-	-
miR-181-x	127.327	11.5035	-3.46839	0.000954441	Unigene0050110	3.33627	6.94707	1.05817	6.9947e-05	0.00583814	PRMT3	Protein arginine N-methyltransferase 3 [Zootermopsis nevadensis]	-	-	-	-	-	-	-
miR-181-x	127.327	11.5035	-3.46839	0.000954441	Unigene0050422	2.4043	5.72143	1.25076	6.66941e-06	0.000851884	Aats-cys	PREDICTED: cysteine--tRNA ligase, cytoplasmic [Neodiprion lecontei]	Genetic Information Processing	Translation	ko00970//Aminoacyl-tRNA biosynthesis	K01883	-	GO:0004812//aminoacyl-tRNA ligase activity;GO:0032550//purine ribonucleoside binding	GO:0006418//tRNA aminoacylation for protein translation
miR-181-x	127.327	11.5035	-3.46839	0.000954441	Unigene0051571	0.9954	2.28797	1.20072	4.90191e-05	0.00439376	Mcm7	DNA replication licensing factor MCM7 [Zootermopsis nevadensis]	Genetic Information Processing	Replication and repair	ko03030//DNA replication	K02210	GO:0043231//intracellular membrane-bounded organelle;GO:0043234//protein complex	GO:0003676//nucleic acid binding;GO:0004386//helicase activity;GO:0032550//purine ribonucleoside binding	GO:0006259//DNA metabolic process;GO:0032392//DNA geometric change
miR-181-x	127.327	11.5035	-3.46839	0.000954441	Unigene0051718	10.9301	28.9282	1.40417	1.10014e-07	2.29534e-05	ITIH4	PREDICTED: inter-alpha-trypsin inhibitor heavy chain H4-like [Halyomorpha halys]	-	-	-	-	-	-	-
miR-181-x	127.327	11.5035	-3.46839	0.000954441	Unigene0052020	0.361333	1.32157	1.87085	2.65875e-05	0.00269177	--	PREDICTED: kinesin-like protein KIF20A isoform X2 [Polistes canadensis]	-	-	-	-	-	-	-
miR-181-x	127.327	11.5035	-3.46839	0.000954441	Unigene0052432	2.62433	6.2716	1.25688	3.58852e-06	0.000501966	Rrp9	U3 small nucleolar RNA-interacting protein 2 [Zootermopsis nevadensis]	-	-	-	-	-	-	-
miR-181-x	127.327	11.5035	-3.46839	0.000954441	Unigene0052522	1.148	2.9417	1.35753	0.000990625	0.0442841	nrf-6	Nose resistant to fluoxetine protein 6 [Zootermopsis nevadensis]	-	-	-	-	-	-	-
miR-181-x	127.327	11.5035	-3.46839	0.000954441	Unigene0052670	0.79	3.35567	2.08667	1.46775e-07	2.92402e-05	Abhd3	Abhydrolase domain-containing protein 3 [Zootermopsis nevadensis]	-	-	-	-	-	-	-
miR-181-x	127.327	11.5035	-3.46839	0.000954441	Unigene0052766	0.0711333	0.367367	2.36862	0.000656404	0.0329175	HYPK	Huntingtin-interacting protein K [Zootermopsis nevadensis]	-	-	-	-	-	-	-
miR-181-x	127.327	11.5035	-3.46839	0.000954441	Unigene0053817	7.66773	15.7791	1.04115	6.88206e-05	0.00575998	SPON1	Spondin-1 [Zootermopsis nevadensis]	-	-	-	-	-	-	-
miR-181-x	127.327	11.5035	-3.46839	0.000954441	Unigene0053858	2.17043	6.27943	1.53265	1.86805e-06	0.000282761	CCND2	PREDICTED: G1/S-specific cyclin-D2 [Neodiprion lecontei]	Environmental Information Processing	Signal transduction	ko04310//Wnt signaling pathway ;ko04068//FoxO signaling pathway	K10151	-	-	-
miR-181-x	127.327	11.5035	-3.46839	0.000954441	Unigene0055429	18.6865	62.3222	1.73775	3.16388e-11	1.40067e-08	NFIX	PREDICTED: nuclear factor 1 X-type isoform X4 [Bemisia tabaci]	-	-	-	-	-	-	-
miR-181-x	127.327	11.5035	-3.46839	0.000954441	Unigene0055471	9.76947	21.0043	1.10433	4.37199e-05	0.00402089	PDPK1	3-phosphoinositide-dependent protein kinase 1 [Zootermopsis nevadensis]	Cellular Processes;Environmental Information Processing	Signal transduction;Transport and catabolism	ko04140//Autophagy - animal ;ko04150//mTOR signaling pathway ;ko04068//FoxO signaling pathway	K06276	-	GO:0004672//protein kinase activity	-
miR-181-x	127.327	11.5035	-3.46839	0.000954441	Unigene0055586	3.3525	7.4863	1.15902	6.1475e-06	0.00079592	TLR2-1	PREDICTED: toll-like receptor 13 [Anoplophora glabripennis]	-	-	-	-	-	-	-
miR-181-x	127.327	11.5035	-3.46839	0.000954441	Unigene0056652	17.4319	39.6782	1.18661	4.24778e-06	0.000577188	SERPINB6	Leukocyte elastase inhibitor C [Zootermopsis nevadensis]	-	-	-	-	-	-	-
miR-181-x	127.327	11.5035	-3.46839	0.000954441	Unigene0056734	16.4333	34.8725	1.08547	8.34645e-06	0.00102448	PSMA1	Proteasome subunit alpha type-1 [Zootermopsis nevadensis]	Genetic Information Processing	Folding, sorting and degradation	ko03050//Proteasome	K02725	-	-	-
miR-181-x	127.327	11.5035	-3.46839	0.000954441	Unigene0056884	0.1328	37.5151	8.14207	9.82512e-06	0.00116463	--	PREDICTED: keratin, type II cytoskeletal 1-like [Anoplophora glabripennis]	-	-	-	-	-	-	-
miR-181-x	127.327	11.5035	-3.46839	0.000954441	Unigene0057020	42.3286	89.9525	1.08753	1.28813e-05	0.00146639	--	PREDICTED: ras guanine nucleotide exchange factor P-like [Diaphorina citri]	-	-	-	-	-	-	-
miR-181-x	127.327	11.5035	-3.46839	0.000954441	Unigene0058963	19.0526	53.4747	1.48887	7.45303e-09	2.04569e-06	Jupiter	Microtubule-associated protein Jupiter [Zootermopsis nevadensis]	-	-	-	-	-	-	-
miR-181-x	127.327	11.5035	-3.46839	0.000954441	Unigene0059394	1.2559	3.99853	1.67075	8.86593e-06	0.00107466	Crisp2	Cysteine-rich secretory protein 2 [Zootermopsis nevadensis]	-	-	-	-	-	-	-
miR-181-x	127.327	11.5035	-3.46839	0.000954441	Unigene0061358	2.30363	6.23277	1.43596	4.58738e-05	0.00417478	--	PREDICTED: protein NDNF [Anoplophora glabripennis]	-	-	-	-	-	-	-
miR-181-x	127.327	11.5035	-3.46839	0.000954441	Unigene0062211	6.69353	13.5747	1.02008	3.90898e-05	0.00367721	PIK3AP1	Phosphoinositide 3-kinase adapter protein 1, partial [Zootermopsis nevadensis]	-	-	-	-	-	-	-
miR-181-x	127.327	11.5035	-3.46839	0.000954441	Unigene0062469	51.8015	110.257	1.0898	4.46762e-05	0.00408452	Sesn	Sestrin-like protein [Zootermopsis nevadensis]	-	-	-	-	-	-	GO:1902882//regulation of response to oxidative stress
miR-181-x	127.327	11.5035	-3.46839	0.000954441	Unigene0062477	10.239	36.4178	1.83056	4.8805e-11	2.05039e-08	Sox11	Transcription factor Sox-11-A [Zootermopsis nevadensis]	-	-	-	-	-	-	-
miR-181-x	127.327	11.5035	-3.46839	0.000954441	Unigene0062571	4.6532	16.5872	1.83377	6.68959e-13	3.84309e-10	--	PREDICTED: protein eva-1 isoform X4 [Nicrophorus vespilloides]	-	-	-	-	-	-	-
miR-181-x	127.327	11.5035	-3.46839	0.000954441	Unigene0063254	5.56083	33.7045	2.59957	1.63952e-19	2.53132e-16	--	AGAP011666-PA, partial [Anopheles gambiae str. PEST] [Anopheles gambiae]	-	-	-	-	-	-	-
miR-181-x	127.327	11.5035	-3.46839	0.000954441	Unigene0063308	1.4262	3.97167	1.47757	1.84668e-07	3.62628e-05	Vegfc	Platelet-derived growth factor subunit A [Zootermopsis nevadensis]	Environmental Information Processing	Signal transduction	ko04010//MAPK signaling pathway	K04359	-	-	-
miR-181-x	127.327	11.5035	-3.46839	0.000954441	Unigene0064121	0.379367	1.09133	1.52443	0.000260329	0.0163056	CHIC2	PREDICTED: cysteine-rich hydrophobic domain-containing protein 2 [Neodiprion lecontei]	-	-	-	-	-	-	-
miR-181-x	127.327	11.5035	-3.46839	0.000954441	Unigene0065387	26.3922	59.1841	1.1651	3.20548e-06	0.000455086	HSD17B13	Epidermal retinal dehydrogenase 2 [Zootermopsis nevadensis]	-	-	-	-	-	-	-
miR-181-x	127.327	11.5035	-3.46839	0.000954441	Unigene0066235	2.0088	5.167	1.36299	5.9963e-06	0.000778793	--	Noggin-2 [Zootermopsis nevadensis]	Environmental Information Processing	Signal transduction	ko04350//TGF-beta signaling pathway	K04658	-	-	-
miR-181-x	127.327	11.5035	-3.46839	0.000954441	Unigene0067549	4.38553	11.249	1.35897	7.44544e-08	1.63054e-05	KEAP1	Kelch-like ECH-associated protein 1 [Zootermopsis nevadensis]	Genetic Information Processing	Folding, sorting and degradation	ko04120//Ubiquitin mediated proteolysis	K10456	-	-	-
miR-181-x	127.327	11.5035	-3.46839	0.000954441	Unigene0067588	1.17457	3.73193	1.66779	2.2799e-07	4.325e-05	Ush1g	PREDICTED: Usher syndrome type-1G protein homolog isoform X1 [Athalia rosae]	-	-	-	-	-	-	-
miR-181-x	127.327	11.5035	-3.46839	0.000954441	Unigene0067793	4.89853	21.5688	2.13852	4.59066e-14	3.22168e-11	Suco	PREDICTED: SUN domain-containing ossification factor [Camponotus floridanus]	-	-	-	-	-	-	-
miR-181-x	127.327	11.5035	-3.46839	0.000954441	Unigene0068296	2.21887	5.25447	1.24372	5.85846e-06	0.000764105	--	hypothetical protein L798_14034 [Zootermopsis nevadensis]	-	-	-	-	-	-	-
miR-181-x	127.327	11.5035	-3.46839	0.000954441	Unigene0068590	66.6932	366.884	2.45971	5.13836e-20	8.2424e-17	--	endonuclease-reverse transcriptase [Blattella germanica]	-	-	-	-	-	-	-
miR-181-x	127.327	11.5035	-3.46839	0.000954441	Unigene0069695	5.3891	14.541	1.43201	2.66275e-07	4.96813e-05	CNPY2	Canopy-like protein 2 [Zootermopsis nevadensis]	-	-	-	-	-	-	-
miR-181-x	127.327	11.5035	-3.46839	0.000954441	Unigene0069818	3.0304	6.3603	1.06959	3.13276e-05	0.0030492	--	Angiotensin-converting enzyme [Zootermopsis nevadensis]	-	-	-	-	-	-	-
miR-181-x	127.327	11.5035	-3.46839	0.000954441	Unigene0070009	1.98873	4.4343	1.15686	2.97923e-05	0.00292952	SUCLG2	Succinyl-CoA ligase [GDP-forming] subunit beta, mitochondrial [Zootermopsis nevadensis]	Metabolism	Global and overview maps;Carbohydrate metabolism	ko01100//Metabolic pathways;ko01200//Carbon metabolism;ko00020//Citrate cycle (TCA cycle) ;ko00640//Propanoate metabolism	K01900	-	-	-
miR-181-x	127.327	11.5035	-3.46839	0.000954441	Unigene0070778	0.366167	53.1106	7.18036	7.26372e-06	0.000911973	--	osiris 19 [Danaus plexippus]	-	-	-	-	-	-	-
miR-181-x	127.327	11.5035	-3.46839	0.000954441	Unigene0071999	146.686	332.008	1.17849	2.44163e-06	0.000359878	ubq-1	PREDICTED: polyubiquitin-C isoform X2 [Apis mellifera]	-	-	-	-	-	-	-
miR-181-x	127.327	11.5035	-3.46839	0.000954441	Unigene0073429	1.56337	3.8765	1.3101	0.000996495	0.0444661	F11	PREDICTED: proclotting enzyme-like [Bemisia tabaci]	-	-	-	-	-	-	-
miR-181-x	127.327	11.5035	-3.46839	0.000954441	Unigene0074297	0.619433	1.35083	1.12483	0.00115769	0.0498576	--	Retinoblastoma-like protein 2 [Zootermopsis nevadensis]	-	-	-	-	-	-	-
miR-181-x	127.327	11.5035	-3.46839	0.000954441	Unigene0076411	1.70873	4.10457	1.2643	1.55565e-05	0.00170797	NHP2	H/ACA ribonucleoprotein complex subunit 2-like protein [Zootermopsis nevadensis]	Genetic Information Processing	Translation	ko03008//Ribosome biogenesis in eukaryotes	K11129	-	-	-
miR-181-x	127.327	11.5035	-3.46839	0.000954441	Unigene0078427	1.59387	4.2131	1.40235	9.09668e-07	0.000149412	RWDD2A	RWD domain-containing protein 2A [Zootermopsis nevadensis]	-	-	-	-	-	-	-
miR-181-x	127.327	11.5035	-3.46839	0.000954441	Unigene0081325	174.455	695.635	1.99547	7.84884e-15	6.4202e-12	Igfbpl1	Kazal-type serine protease inhibitor domain-containing protein 1 [Zootermopsis nevadensis]	-	-	-	-	-	-	-
miR-181-x	127.327	11.5035	-3.46839	0.000954441	Unigene0097544	0.001	0.5173	9.01486	0.00103726	0.0458216	--	endonuclease-reverse transcriptase [Blattella germanica]	-	-	-	-	-	-	-
miR-181-y	4.48083	0.1623	-4.78703	0.000566599	Unigene0001636	2.5542	6.38673	1.32221	1.60163e-07	3.18048e-05	hgh1	Brain protein 16 [Zootermopsis nevadensis]	-	-	-	-	-	-	-
miR-181-y	4.48083	0.1623	-4.78703	0.000566599	Unigene0014683	0.001	0.801933	9.64734	0.000489679	0.026509	--	hypothetical protein [Daphnia magna]	-	-	-	-	-	-	-
miR-181-y	4.48083	0.1623	-4.78703	0.000566599	Unigene0016269	0.017	11.7667	9.43496	4.47973e-05	0.00409256	--	daphnid bacterial-ribosomal-RNA-like, possible HGT [Daphnia magna]	-	-	-	-	-	-	-
miR-181-y	4.48083	0.1623	-4.78703	0.000566599	Unigene0035078	0.145133	17.5516	6.91808	0.000857335	0.0400203	--	PREDICTED: osiris 20 isoform X1 [Bombyx mori]	-	-	-	-	-	-	-
miR-181-y	4.48083	0.1623	-4.78703	0.000566599	Unigene0043244	12.0198	27.0068	1.16791	9.65857e-06	0.00115152	PGLYRP1	Peptidoglycan recognition protein I-alpha, partial [Zootermopsis nevadensis]	Organismal Systems	Immune system	ko04624//Toll and Imd signaling pathway	K01446	-	-	-
miR-181-y	4.48083	0.1623	-4.78703	0.000566599	Unigene0050908	24.9074	99.1526	1.99307	1.29505e-14	1.01884e-11	--	Nuclear factor interleukin-3-regulated protein [Zootermopsis nevadensis]	Organismal Systems	Environmental adaptation	ko04711//Circadian rhythm - fly	K12114	-	-	-
miR-181-y	4.48083	0.1623	-4.78703	0.000566599	Unigene0053437	44.0491	104.024	1.23973	1.29392e-06	0.000204906	Klf11	Krueppel-like factor 10 [Zootermopsis nevadensis]	-	-	-	-	-	-	-
miR-181-y	4.48083	0.1623	-4.78703	0.000566599	Unigene0053817	7.66773	15.7791	1.04115	6.88206e-05	0.00575998	SPON1	Spondin-1 [Zootermopsis nevadensis]	-	-	-	-	-	-	-
miR-181-y	4.48083	0.1623	-4.78703	0.000566599	Unigene0073631	16.1623	44.4846	1.46067	2.54259e-08	6.24349e-06	SLC16A14	Monocarboxylate transporter 5 [Zootermopsis nevadensis]	-	-	-	-	-	-	-
miR-185-x	3.9991	0.0849333	-5.5572	0.000136945	Unigene0001636	2.5542	6.38673	1.32221	1.60163e-07	3.18048e-05	hgh1	Brain protein 16 [Zootermopsis nevadensis]	-	-	-	-	-	-	-
miR-185-x	3.9991	0.0849333	-5.5572	0.000136945	Unigene0001848	2.1059	4.2861	1.02523	9.82357e-05	0.00761836	osgep	PREDICTED: probable tRNA N6-adenosine threonylcarbamoyltransferase [Anoplophora glabripennis]	-	-	-	-	GO:0044424//intracellular part	GO:0016746//transferase activity, transferring acyl groups;GO:0043169//cation binding	GO:0006400//tRNA modification
miR-185-x	3.9991	0.0849333	-5.5572	0.000136945	Unigene0003250	4.2621	8.88633	1.06002	2.69332e-05	0.00271564	Glra4	PREDICTED: glycine receptor subunit alpha-4 isoform X19 [Cimex lectularius]	-	-	-	-	-	-	-
miR-185-x	3.9991	0.0849333	-5.5572	0.000136945	Unigene0003266	4.68583	9.4515	1.01224	8.1783e-05	0.00660656	--	myotubularin-related protein 10-b [Lasius niger]	-	-	-	-	-	-	-
miR-185-x	3.9991	0.0849333	-5.5572	0.000136945	Unigene0004749	6.82943	14.5877	1.09491	8.03722e-06	0.000993711	dan	Protein distal antenna [Zootermopsis nevadensis]	-	-	-	-	-	-	-
miR-185-x	3.9991	0.0849333	-5.5572	0.000136945	Unigene0005195	186.44	495.912	1.41138	3.41216e-05	0.00328491	PebIII	ejaculatory bulb-specific protein III [Coptotermes formosanus]	-	-	-	-	-	-	-
miR-185-x	3.9991	0.0849333	-5.5572	0.000136945	Unigene0005998	5.99127	12.4726	1.05783	4.59602e-05	0.00417717	Nelf-E	Negative elongation factor E [Zootermopsis nevadensis]	-	-	-	-	-	GO:0008135//translation factor activity, RNA binding	GO:0034645//cellular macromolecule biosynthetic process
miR-185-x	3.9991	0.0849333	-5.5572	0.000136945	Unigene0013587	3.1894	10.5935	1.73182	2.49757e-11	1.12999e-08	--	Peptidyl-prolyl cis-trans isomerase SDCCAG10, partial [Zootermopsis nevadensis]	-	-	-	-	-	-	-
miR-185-x	3.9991	0.0849333	-5.5572	0.000136945	Unigene0013597	0.370067	1.08667	1.55405	0.000872241	0.040502	--	DDE superfamily endonuclease [Nuttalliella namaqua]	-	-	-	-	-	-	-
miR-185-x	3.9991	0.0849333	-5.5572	0.000136945	Unigene0013634	0.127233	17.1231	7.07233	7.34666e-05	0.00610237	--	osiris 19 precursor [Bombyx mori]	-	-	-	-	-	-	-
miR-185-x	3.9991	0.0849333	-5.5572	0.000136945	Unigene0014529	0.0441333	12.0016	8.08714	1.72977e-05	0.00187184	LysP	C-type lysozyme-3 [Coptotermes formosanus]	-	-	-	-	-	-	-
miR-185-x	3.9991	0.0849333	-5.5572	0.000136945	Unigene0043488	3.4484	11.8447	1.78024	2.64283e-08	6.45116e-06	HSDL1	PREDICTED: inactive hydroxysteroid dehydrogenase-like protein 1 [Bemisia tabaci]	-	-	-	-	-	GO:0003824//catalytic activity	GO:0044710//single-organism metabolic process
miR-185-x	3.9991	0.0849333	-5.5572	0.000136945	Unigene0047040	1.16037	4.03847	1.79923	2.12034e-10	7.86467e-08	--	reverse transcriptase [Bactrocera tryoni]	-	-	-	-	-	-	-
miR-185-x	3.9991	0.0849333	-5.5572	0.000136945	Unigene0047043	2.1238	6.4837	1.61017	3.83433e-09	1.11697e-06	tx	Helix-loop-helix protein delilah [Zootermopsis nevadensis]	-	-	-	-	-	-	-
miR-185-x	3.9991	0.0849333	-5.5572	0.000136945	Unigene0047371	0.5235	5.8567	3.48383	9.93558e-18	1.22719e-14	SOSTDC1	Sclerostin domain-containing protein 1 [Zootermopsis nevadensis]	-	-	-	-	-	-	-
miR-185-x	3.9991	0.0849333	-5.5572	0.000136945	Unigene0048010	0.0193333	2.38197	6.94492	4.39877e-05	0.00404143	--	--	-	-	-	-	-	-	-
miR-185-x	3.9991	0.0849333	-5.5572	0.000136945	Unigene0048541	7.53327	109.899	3.86676	5.97835e-21	1.04002e-17	MSTN	PREDICTED: growth/differentiation factor 8 [Cimex lectularius]	-	-	-	-	-	-	-
miR-185-x	3.9991	0.0849333	-5.5572	0.000136945	Unigene0049347	10.2171	25.5257	1.32096	1.2343e-07	2.51576e-05	PSMC4	26S protease regulatory subunit 6B [Zootermopsis nevadensis]	Genetic Information Processing	Folding, sorting and degradation	ko03050//Proteasome	K03063	GO:0044424//intracellular part	GO:0032550//purine ribonucleoside binding;GO:0042623//ATPase activity, coupled	GO:0009057//macromolecule catabolic process;GO:0019538//protein metabolic process
miR-185-x	3.9991	0.0849333	-5.5572	0.000136945	Unigene0049612	6.97003	39.4536	2.50092	8.99204e-18	1.12187e-14	--	Transcriptional regulator ICP4 domain-containing protein [Daphnia magna]	-	-	-	-	-	-	-
miR-185-x	3.9991	0.0849333	-5.5572	0.000136945	Unigene0049970	3.90623	13.1317	1.74921	5.24015e-07	9.14177e-05	ACHE1	Esterase FE4 [Zootermopsis nevadensis]	Metabolism	Metabolism of terpenoids and polyketides	ko00981//Insect hormone biosynthesis	K01063	-	-	-
miR-185-x	3.9991	0.0849333	-5.5572	0.000136945	Unigene0050175	3.78403	8.14507	1.106	0.000197017	0.0131514	rasl11b	Ras-like protein family member 11B [Zootermopsis nevadensis]	-	-	-	-	-	-	-
miR-185-x	3.9991	0.0849333	-5.5572	0.000136945	Unigene0050202	7.31317	19.2982	1.3999	5.66731e-08	1.29151e-05	Rtkn	Rhotekin [Zootermopsis nevadensis]	-	-	-	-	-	-	-
miR-185-x	3.9991	0.0849333	-5.5572	0.000136945	Unigene0053533	7.338	15.6737	1.09488	8.26007e-06	0.00101618	BMS1	Ribosome biogenesis protein BMS1-like protein [Zootermopsis nevadensis]	Genetic Information Processing	Translation	ko03008//Ribosome biogenesis in eukaryotes	K14569	-	-	-
miR-185-x	3.9991	0.0849333	-5.5572	0.000136945	Unigene0054408	6.33227	14.6165	1.2068	5.54616e-06	0.000727212	ck	Myosin-VIIa [Zootermopsis nevadensis]	-	-	-	-	-	-	-
miR-185-x	3.9991	0.0849333	-5.5572	0.000136945	Unigene0057020	42.3286	89.9525	1.08753	1.28813e-05	0.00146639	--	PREDICTED: ras guanine nucleotide exchange factor P-like [Diaphorina citri]	-	-	-	-	-	-	-
miR-185-x	3.9991	0.0849333	-5.5572	0.000136945	Unigene0062211	6.69353	13.5747	1.02008	3.90898e-05	0.00367721	PIK3AP1	Phosphoinositide 3-kinase adapter protein 1, partial [Zootermopsis nevadensis]	-	-	-	-	-	-	-
miR-185-x	3.9991	0.0849333	-5.5572	0.000136945	Unigene0062219	2.9216	29.3234	3.32722	0.000335228	0.0197924	--	LisH domain-containing protein ARMC9 [Zootermopsis nevadensis]	-	-	-	-	-	-	-
miR-185-x	3.9991	0.0849333	-5.5572	0.000136945	Unigene0062477	10.239	36.4178	1.83056	4.8805e-11	2.05039e-08	Sox11	Transcription factor Sox-11-A [Zootermopsis nevadensis]	-	-	-	-	-	-	-
miR-185-x	3.9991	0.0849333	-5.5572	0.000136945	Unigene0062616	1.78627	6.22527	1.80119	0.000199865	0.0132865	--	Chondroitin proteoglycan-2 [Zootermopsis nevadensis]	-	-	-	-	-	GO:0097367//carbohydrate derivative binding	GO:0006022//aminoglycan metabolic process
miR-185-x	3.9991	0.0849333	-5.5572	0.000136945	Unigene0067549	4.38553	11.249	1.35897	7.44544e-08	1.63054e-05	KEAP1	Kelch-like ECH-associated protein 1 [Zootermopsis nevadensis]	Genetic Information Processing	Folding, sorting and degradation	ko04120//Ubiquitin mediated proteolysis	K10456	-	-	-
miR-185-x	3.9991	0.0849333	-5.5572	0.000136945	Unigene0067979	0.0844667	5.93193	6.13398	8.54034e-05	0.00682932	--	Pro-resilin [Zootermopsis nevadensis]	-	-	-	-	-	-	-
miR-185-x	3.9991	0.0849333	-5.5572	0.000136945	Unigene0069758	4.47567	9.00657	1.00887	5.07922e-05	0.00451338	abcb6	ATP-binding cassette sub-family B member 6, mitochondrial [Zootermopsis nevadensis]	Environmental Information Processing	Membrane transport	ko02010//ABC transporters	K05661	-	-	-
miR-186-x	21.8895	2.23673	-3.29077	0.000481339	Unigene0000359	6.35037	18.9198	1.57499	2.91942e-06	0.000420761	AMBP	PREDICTED: papilin [Crassostrea gigas]	-	-	-	-	-	-	-
miR-186-x	21.8895	2.23673	-3.29077	0.000481339	Unigene0001337	0.208367	10.4152	5.64342	8.23045e-05	0.00663567	--	AGAP013007-PA [Anopheles gambiae str. PEST] [Anopheles gambiae]	-	-	-	-	-	-	-
miR-186-x	21.8895	2.23673	-3.29077	0.000481339	Unigene0001785	1.41493	3.6649	1.37304	1.20764e-05	0.00138885	--	Mite allergen Lep d 7 [Zootermopsis nevadensis]	-	-	-	-	-	-	-
miR-186-x	21.8895	2.23673	-3.29077	0.000481339	Unigene0002108	3.55747	8.12907	1.19224	4.43643e-05	0.00406503	--	hypothetical protein L798_03788 [Zootermopsis nevadensis]	-	-	-	-	-	-	-
miR-186-x	21.8895	2.23673	-3.29077	0.000481339	Unigene0003250	4.2621	8.88633	1.06002	2.69332e-05	0.00271564	Glra4	PREDICTED: glycine receptor subunit alpha-4 isoform X19 [Cimex lectularius]	-	-	-	-	-	-	-
miR-186-x	21.8895	2.23673	-3.29077	0.000481339	Unigene0003266	4.68583	9.4515	1.01224	8.1783e-05	0.00660656	--	myotubularin-related protein 10-b [Lasius niger]	-	-	-	-	-	-	-
miR-186-x	21.8895	2.23673	-3.29077	0.000481339	Unigene0003479	6.10827	16.7422	1.45465	1.0775e-05	0.00125856	Gld	Glucose dehydrogenase [acceptor], partial [Zootermopsis nevadensis]	-	-	-	-	-	-	-
miR-186-x	21.8895	2.23673	-3.29077	0.000481339	Unigene0004273	2.39807	10.1769	2.08535	2.8971e-12	1.54239e-09	--	PREDICTED: RNA-directed DNA polymerase from mobile element jockey-like [Linepithema humile]	-	-	-	-	-	-	-
miR-186-x	21.8895	2.23673	-3.29077	0.000481339	Unigene0004647	1.9383	4.01037	1.04894	0.000118767	0.0088584	iHog	Interference hedgehog [Zootermopsis nevadensis]	Environmental Information Processing	Signal transduction	ko04341//Hedgehog signaling pathway - fly	K20245	-	-	-
miR-186-x	21.8895	2.23673	-3.29077	0.000481339	Unigene0004696	3.11633	6.3693	1.03129	8.68489e-05	0.00690737	bwa	Alkaline ceramidase [Zootermopsis nevadensis]	Metabolism	Lipid metabolism;Global and overview maps	ko01100//Metabolic pathways;ko00600//Sphingolipid metabolism	K01441	GO:0031224//intrinsic component of membrane	GO:0016810//hydrolase activity, acting on carbon-nitrogen (but not peptide) bonds	-
miR-186-x	21.8895	2.23673	-3.29077	0.000481339	Unigene0005195	186.44	495.912	1.41138	3.41216e-05	0.00328491	PebIII	ejaculatory bulb-specific protein III [Coptotermes formosanus]	-	-	-	-	-	-	-
miR-186-x	21.8895	2.23673	-3.29077	0.000481339	Unigene0005998	5.99127	12.4726	1.05783	4.59602e-05	0.00417717	Nelf-E	Negative elongation factor E [Zootermopsis nevadensis]	-	-	-	-	-	GO:0008135//translation factor activity, RNA binding	GO:0034645//cellular macromolecule biosynthetic process
miR-186-x	21.8895	2.23673	-3.29077	0.000481339	Unigene0006524	6.25787	32.7384	2.38724	2.34088e-06	0.000347517	--	--	-	-	-	-	-	-	-
miR-186-x	21.8895	2.23673	-3.29077	0.000481339	Unigene0007263	5.3711	11.285	1.07111	7.99372e-05	0.00649142	per	Period circadian protein [Zootermopsis nevadensis]	Organismal Systems	Environmental adaptation	ko04711//Circadian rhythm - fly	K02633	-	-	-
miR-186-x	21.8895	2.23673	-3.29077	0.000481339	Unigene0009639	11.191	29.5584	1.40122	8.81905e-08	1.87808e-05	CDK5RAP3	PREDICTED: CDK5 regulatory subunit-associated protein 3 [Athalia rosae]	-	-	-	-	-	-	-
miR-186-x	21.8895	2.23673	-3.29077	0.000481339	Unigene0010941	2.24127	8.09233	1.85224	6.25871e-05	0.00532033	PXDN	PREDICTED: lactoperoxidase [Athalia rosae]	-	-	-	-	-	-	-
miR-186-x	21.8895	2.23673	-3.29077	0.000481339	Unigene0013587	3.1894	10.5935	1.73182	2.49757e-11	1.12999e-08	--	Peptidyl-prolyl cis-trans isomerase SDCCAG10, partial [Zootermopsis nevadensis]	-	-	-	-	-	-	-
miR-186-x	21.8895	2.23673	-3.29077	0.000481339	Unigene0013971	0.253233	0.915267	1.85372	1.15975e-05	0.00134251	--	hypothetical protein L798_03788 [Zootermopsis nevadensis]	-	-	-	-	-	-	-
miR-186-x	21.8895	2.23673	-3.29077	0.000481339	Unigene0014010	13.8877	36.1098	1.37858	6.63723e-08	1.47711e-05	twk-7	PREDICTED: TWiK family of potassium channels protein 7-like [Dufourea novaeangliae]	-	-	-	-	-	-	-
miR-186-x	21.8895	2.23673	-3.29077	0.000481339	Unigene0028951	10.887	40.8248	1.90683	1.29649e-12	7.27891e-10	--	DNA (cytosine-5)-methyltransferase 3A, partial [Habropoda laboriosa]	-	-	-	-	-	-	-
miR-186-x	21.8895	2.23673	-3.29077	0.000481339	Unigene0040826	0.111633	0.927333	3.05432	1.77843e-08	4.61477e-06	--	Cuticle protein 6, partial [Stegodyphus mimosarum]	-	-	-	-	-	-	-
miR-186-x	21.8895	2.23673	-3.29077	0.000481339	Unigene0043244	12.0198	27.0068	1.16791	9.65857e-06	0.00115152	PGLYRP1	Peptidoglycan recognition protein I-alpha, partial [Zootermopsis nevadensis]	Organismal Systems	Immune system	ko04624//Toll and Imd signaling pathway	K01446	-	-	-
miR-186-x	21.8895	2.23673	-3.29077	0.000481339	Unigene0044636	0.5683	3.91823	2.78548	3.21885e-12	1.68464e-09	AGAP002721	PREDICTED: tryptophan 2,3-dioxygenase [Nicrophorus vespilloides]	Metabolism	Amino acid metabolism;Global and overview maps	ko01100//Metabolic pathways;ko00380//Tryptophan metabolism	K00453	-	-	-
miR-186-x	21.8895	2.23673	-3.29077	0.000481339	Unigene0045529	0.3205	4.92387	3.9414	2.876e-18	3.77903e-15	--	PREDICTED: mucin-5AC [Bemisia tabaci]	-	-	-	-	-	-	-
miR-186-x	21.8895	2.23673	-3.29077	0.000481339	Unigene0046309	1.76823	3.9214	1.14906	4.98704e-05	0.00444846	Polr3e	DNA-directed RNA polymerase III subunit RPC5 [Zootermopsis nevadensis]	Genetic Information Processing;Metabolism	Transcription;Nucleotide metabolism	ko00230//Purine metabolism ;ko00240//Pyrimidine metabolism ;ko03020//RNA polymerase	K14721	-	-	-
miR-186-x	21.8895	2.23673	-3.29077	0.000481339	Unigene0046825	18.1032	43.5442	1.26623	0.000170324	0.0117594	Spon1	PREDICTED: somatomedin-B and thrombospondin type-1 domain-containing protein [Acyrthosiphon pisum]	-	-	-	-	-	-	-
miR-186-x	21.8895	2.23673	-3.29077	0.000481339	Unigene0047043	2.1238	6.4837	1.61017	3.83433e-09	1.11697e-06	tx	Helix-loop-helix protein delilah [Zootermopsis nevadensis]	-	-	-	-	-	-	-
miR-186-x	21.8895	2.23673	-3.29077	0.000481339	Unigene0047174	0.3804	1.27173	1.74121	7.06226e-06	0.00089283	Ccnjl	Cyclin-J-like protein [Zootermopsis nevadensis]	-	-	-	-	-	-	-
miR-186-x	21.8895	2.23673	-3.29077	0.000481339	Unigene0048884	0.159867	3.1238	4.28836	5.67072e-14	3.86972e-11	--	--	-	-	-	-	-	-	-
miR-186-x	21.8895	2.23673	-3.29077	0.000481339	Unigene0049212	2.59333	7.76173	1.58157	2.34712e-08	5.7981e-06	--	HEAT repeat-containing protein 3 [Zootermopsis nevadensis]	-	-	-	-	-	-	-
miR-186-x	21.8895	2.23673	-3.29077	0.000481339	Unigene0049397	0.444733	2.93903	2.72433	1.23264e-11	6.01778e-09	B1	carboxylesterase [Oxya chinensis]	Metabolism	Xenobiotics biodegradation and metabolism	ko00983//Drug metabolism - other enzymes	K03927	-	-	-
miR-186-x	21.8895	2.23673	-3.29077	0.000481339	Unigene0049610	0.0826	16.9744	7.68301	4.01104e-06	0.000551083	D11DS	PREDICTED: acyl-CoA Delta(11) desaturase-like [Copidosoma floridanum]	Metabolism;Organismal Systems	Lipid metabolism;Aging;Global and overview maps	ko04212//Longevity regulating pathway - worm ;ko01212//Fatty acid metabolism;ko01040//Biosynthesis of unsaturated fatty acids	K00507	-	GO:0016491//oxidoreductase activity	GO:0044710//single-organism metabolic process
miR-186-x	21.8895	2.23673	-3.29077	0.000481339	Unigene0050202	7.31317	19.2982	1.3999	5.66731e-08	1.29151e-05	Rtkn	Rhotekin [Zootermopsis nevadensis]	-	-	-	-	-	-	-
miR-186-x	21.8895	2.23673	-3.29077	0.000481339	Unigene0050422	2.4043	5.72143	1.25076	6.66941e-06	0.000851884	Aats-cys	PREDICTED: cysteine--tRNA ligase, cytoplasmic [Neodiprion lecontei]	Genetic Information Processing	Translation	ko00970//Aminoacyl-tRNA biosynthesis	K01883	-	GO:0004812//aminoacyl-tRNA ligase activity;GO:0032550//purine ribonucleoside binding	GO:0006418//tRNA aminoacylation for protein translation
miR-186-x	21.8895	2.23673	-3.29077	0.000481339	Unigene0050437	13.0072	42.7001	1.71492	3.617e-11	1.5842e-08	--	P-selectin [Zootermopsis nevadensis]	-	-	-	-	-	-	-
miR-186-x	21.8895	2.23673	-3.29077	0.000481339	Unigene0051743	4.04197	9.99657	1.30638	2.89959e-06	0.000418391	ABCG1	ATP-binding cassette sub-family G member 1-like protein [Laodelphax striatella]	Environmental Information Processing	Membrane transport	ko02010//ABC transporters	K05679	-	GO:0042626//ATPase activity, coupled to transmembrane movement of substances	GO:0044765//single-organism transport
miR-186-x	21.8895	2.23673	-3.29077	0.000481339	Unigene0052303	8.92197	21.5162	1.26999	0.000410955	0.0231565	MMEL1	Membrane metallo-endopeptidase-like 1 [Zootermopsis nevadensis]	-	-	-	-	-	GO:0070011//peptidase activity, acting on L-amino acid peptides	GO:0019538//protein metabolic process
miR-186-x	21.8895	2.23673	-3.29077	0.000481339	Unigene0052670	0.79	3.35567	2.08667	1.46775e-07	2.92402e-05	Abhd3	Abhydrolase domain-containing protein 3 [Zootermopsis nevadensis]	-	-	-	-	-	-	-
miR-186-x	21.8895	2.23673	-3.29077	0.000481339	Unigene0053345	0.973067	5.528	2.50615	3.83951e-11	1.66399e-08	--	hypothetical protein L798_09305 [Zootermopsis nevadensis]	-	-	-	-	-	-	-
miR-186-x	21.8895	2.23673	-3.29077	0.000481339	Unigene0053437	44.0491	104.024	1.23973	1.29392e-06	0.000204906	Klf11	Krueppel-like factor 10 [Zootermopsis nevadensis]	-	-	-	-	-	-	-
miR-186-x	21.8895	2.23673	-3.29077	0.000481339	Unigene0053514	12.8588	32.1893	1.32382	0.000344697	0.0202643	--	DNA topoisomerase 2-alpha [Orchesella cincta]	-	-	-	-	-	-	-
miR-186-x	21.8895	2.23673	-3.29077	0.000481339	Unigene0054408	6.33227	14.6165	1.2068	5.54616e-06	0.000727212	ck	Myosin-VIIa [Zootermopsis nevadensis]	-	-	-	-	-	-	-
miR-186-x	21.8895	2.23673	-3.29077	0.000481339	Unigene0055663	0.438067	5.18573	3.56533	0.000956884	0.0433475	--	PREDICTED: zinc finger CCCH domain-containing protein 4-like [Halyomorpha halys]	-	-	-	-	-	-	-
miR-186-x	21.8895	2.23673	-3.29077	0.000481339	Unigene0055707	1.45373	4.21943	1.53729	2.42535e-06	0.000357905	--	PREDICTED: sialin [Cerapachys biroi]	-	-	-	-	-	-	-
miR-186-x	21.8895	2.23673	-3.29077	0.000481339	Unigene0055978	17.6549	53.807	1.60772	2.01007e-10	7.52343e-08	--	PREDICTED: ankyrin repeat and SOCS box protein 14-like [Bemisia tabaci]	-	-	-	-	-	-	-
miR-186-x	21.8895	2.23673	-3.29077	0.000481339	Unigene0056884	0.1328	37.5151	8.14207	9.82512e-06	0.00116463	--	PREDICTED: keratin, type II cytoskeletal 1-like [Anoplophora glabripennis]	-	-	-	-	-	-	-
miR-186-x	21.8895	2.23673	-3.29077	0.000481339	Unigene0057775	6.43987	14.5438	1.1753	5.83967e-06	0.00076246	--	PREDICTED: storkhead-box protein 2 isoform X2 [Megachile rotundata]	-	-	-	-	-	-	-
miR-186-x	21.8895	2.23673	-3.29077	0.000481339	Unigene0060530	1.13893	2.85417	1.32539	7.73989e-06	0.000962731	NINJ2	PREDICTED: ninjurin-2-like isoform X3 [Anoplophora glabripennis]	-	-	-	-	-	-	-
miR-186-x	21.8895	2.23673	-3.29077	0.000481339	Unigene0062477	10.239	36.4178	1.83056	4.8805e-11	2.05039e-08	Sox11	Transcription factor Sox-11-A [Zootermopsis nevadensis]	-	-	-	-	-	-	-
miR-186-x	21.8895	2.23673	-3.29077	0.000481339	Unigene0063308	1.4262	3.97167	1.47757	1.84668e-07	3.62628e-05	Vegfc	Platelet-derived growth factor subunit A [Zootermopsis nevadensis]	Environmental Information Processing	Signal transduction	ko04010//MAPK signaling pathway	K04359	-	-	-
miR-186-x	21.8895	2.23673	-3.29077	0.000481339	Unigene0064457	7.99983	20.7579	1.37562	2.43538e-07	4.56458e-05	UGT2B7	UDP-glucuronosyltransferase 2B7, partial [Zootermopsis nevadensis]	Metabolism	Xenobiotics biodegradation and metabolism;Metabolism of cofactors and vitamins;Carbohydrate metabolism;Global and overview maps	ko01100//Metabolic pathways;ko00983//Drug metabolism - other enzymes ;ko00040//Pentose and glucuronate interconversions ;ko00860//Porphyrin and chlorophyll metabolism ;ko00980//Metabolism of xenobiotics by cytochrome P450 ;ko00982//Drug metabolism - cytochrome P450 ;ko00053//Ascorbate and aldarate metabolism ;ko00830//Retinol metabolism	K00699	-	-	-
miR-186-x	21.8895	2.23673	-3.29077	0.000481339	Unigene0065387	26.3922	59.1841	1.1651	3.20548e-06	0.000455086	HSD17B13	Epidermal retinal dehydrogenase 2 [Zootermopsis nevadensis]	-	-	-	-	-	-	-
miR-186-x	21.8895	2.23673	-3.29077	0.000481339	Unigene0065410	11.3147	23.0624	1.02734	2.70927e-05	0.0027229	CdGAPr	PREDICTED: GTPase-activating protein CdGAPr isoform X1 [Cephus cinctus]	-	-	-	-	-	-	-
miR-186-x	21.8895	2.23673	-3.29077	0.000481339	Unigene0067549	4.38553	11.249	1.35897	7.44544e-08	1.63054e-05	KEAP1	Kelch-like ECH-associated protein 1 [Zootermopsis nevadensis]	Genetic Information Processing	Folding, sorting and degradation	ko04120//Ubiquitin mediated proteolysis	K10456	-	-	-
miR-186-x	21.8895	2.23673	-3.29077	0.000481339	Unigene0067793	4.89853	21.5688	2.13852	4.59066e-14	3.22168e-11	Suco	PREDICTED: SUN domain-containing ossification factor [Camponotus floridanus]	-	-	-	-	-	-	-
miR-186-x	21.8895	2.23673	-3.29077	0.000481339	Unigene0069758	4.47567	9.00657	1.00887	5.07922e-05	0.00451338	abcb6	ATP-binding cassette sub-family B member 6, mitochondrial [Zootermopsis nevadensis]	Environmental Information Processing	Membrane transport	ko02010//ABC transporters	K05661	-	-	-
miR-186-x	21.8895	2.23673	-3.29077	0.000481339	Unigene0071540	0.284	1.01807	1.84187	1.41729e-05	0.00157851	--	period [Rhyparobia maderae]	Organismal Systems	Environmental adaptation	ko04711//Circadian rhythm - fly	K02633	-	-	GO:0010468//regulation of gene expression;GO:0050794//regulation of cellular process
miR-186-x	21.8895	2.23673	-3.29077	0.000481339	Unigene0076411	1.70873	4.10457	1.2643	1.55565e-05	0.00170797	NHP2	H/ACA ribonucleoprotein complex subunit 2-like protein [Zootermopsis nevadensis]	Genetic Information Processing	Translation	ko03008//Ribosome biogenesis in eukaryotes	K11129	-	-	-
miR-191-x	153.382	19.6188	-2.96682	0.000952824	Unigene0010195	0.559	2.95653	2.40299	0.000261403	0.0163479	--	Filamentous hemagglutinin [Zootermopsis nevadensis]	-	-	-	-	-	-	-
miR-191-x	153.382	19.6188	-2.96682	0.000952824	Unigene0011319	0.1757	3.51097	4.32068	1.20552e-05	0.0013877	AAEL008004	Elongation of very long chain fatty acids protein 7 [Zootermopsis nevadensis]	-	-	-	-	-	-	-
miR-191-x	153.382	19.6188	-2.96682	0.000952824	Unigene0013754	3.24617	8.3187	1.35762	2.34253e-07	4.41737e-05	Lrrc47	Leucine-rich repeat-containing protein 47 [Zootermopsis nevadensis]	-	-	-	-	-	-	-
miR-191-x	153.382	19.6188	-2.96682	0.000952824	Unigene0014529	0.0441333	12.0016	8.08714	1.72977e-05	0.00187184	LysP	C-type lysozyme-3 [Coptotermes formosanus]	-	-	-	-	-	-	-
miR-191-x	153.382	19.6188	-2.96682	0.000952824	Unigene0046802	0.953433	2.0067	1.07362	0.00013124	0.00956273	ems	PREDICTED: homeotic protein empty spiracles-like [Bemisia tabaci]	-	-	-	-	GO:0043231//intracellular membrane-bounded organelle	GO:0003677//DNA binding	GO:0010468//regulation of gene expression
miR-191-x	153.382	19.6188	-2.96682	0.000952824	Unigene0047597	0.219633	2.49363	3.50508	0.000834776	0.039384	--	ryanodine receptor-like protein [Phlebotomus papatasi]	-	-	-	-	-	-	-
miR-191-x	153.382	19.6188	-2.96682	0.000952824	Unigene0047748	0.00863333	5.57033	9.33363	0.000445229	0.0246582	--	Pro-resilin [Zootermopsis nevadensis]	-	-	-	-	-	GO:0005214//structural constituent of chitin-based cuticle	GO:0042335//cuticle development
miR-191-x	153.382	19.6188	-2.96682	0.000952824	Unigene0048331	0.686367	1.79593	1.38768	0.000126944	0.00932191	--	conserved Plasmodium protein, unknown function [Plasmodium vivax]	-	-	-	-	-	-	-
miR-191-x	153.382	19.6188	-2.96682	0.000952824	Unigene0049212	2.59333	7.76173	1.58157	2.34712e-08	5.7981e-06	--	HEAT repeat-containing protein 3 [Zootermopsis nevadensis]	-	-	-	-	-	-	-
miR-191-x	153.382	19.6188	-2.96682	0.000952824	Unigene0049612	6.97003	39.4536	2.50092	8.99204e-18	1.12187e-14	--	Transcriptional regulator ICP4 domain-containing protein [Daphnia magna]	-	-	-	-	-	-	-
miR-191-x	153.382	19.6188	-2.96682	0.000952824	Unigene0049683	41.6646	86.0417	1.04622	1.79741e-05	0.00193723	ier5l	Immediate early response gene 5-like protein [Zootermopsis nevadensis]	-	-	-	-	-	-	-
miR-191-x	153.382	19.6188	-2.96682	0.000952824	Unigene0049990	18.5096	60.8344	1.71661	1.23944e-11	6.02713e-09	--	PREDICTED: sine oculis-binding protein homolog isoform X1 [Cimex lectularius]	-	-	-	-	-	-	-
miR-191-x	153.382	19.6188	-2.96682	0.000952824	Unigene0051138	0.993567	2.36393	1.2505	1.00271e-05	0.00118614	p	PREDICTED: Hermansky-Pudlak syndrome 5 protein homolog [Ceratina calcarata]	-	-	-	-	-	-	-
miR-191-x	153.382	19.6188	-2.96682	0.000952824	Unigene0062797	2.29733	23.0133	3.32444	1.0164e-15	9.80783e-13	Est-5B	Esterase FE4 [Zootermopsis nevadensis]	-	-	-	-	-	-	-
miR-191-x	153.382	19.6188	-2.96682	0.000952824	Unigene0072284	14.4483	42.4809	1.55591	9.53368e-08	2.01291e-05	AAEL008004	Elongation of very long chain fatty acids protein [Zootermopsis nevadensis]	-	-	-	-	GO:0016020//membrane	-	GO:0006631//fatty acid metabolic process
miR-197-y	3.51233	0.2048	-4.10014	0.0013547	Unigene0001082	5.81447	12.1796	1.06675	6.04212e-05	0.00518619	Usp45	Ubiquitin carboxyl-terminal hydrolase 16, partial [Zootermopsis nevadensis]	-	-	-	-	-	-	-
miR-197-y	3.51233	0.2048	-4.10014	0.0013547	Unigene0001848	2.1059	4.2861	1.02523	9.82357e-05	0.00761836	osgep	PREDICTED: probable tRNA N6-adenosine threonylcarbamoyltransferase [Anoplophora glabripennis]	-	-	-	-	GO:0044424//intracellular part	GO:0016746//transferase activity, transferring acyl groups;GO:0043169//cation binding	GO:0006400//tRNA modification
miR-197-y	3.51233	0.2048	-4.10014	0.0013547	Unigene0002500	8.97507	27.0564	1.59197	5.94896e-08	1.3433e-05	COL9A1	PREDICTED: collagen alpha-1(IX) chain-like isoform X1 [Aethina tumida]	Environmental Information Processing	Signaling molecules and interaction	ko04512//ECM-receptor interaction	K08131	-	-	-
miR-197-y	3.51233	0.2048	-4.10014	0.0013547	Unigene0002758	2.28233	8.3268	1.86725	1.87977e-09	5.89288e-07	--	Protein CREG1 [Zootermopsis nevadensis]	-	-	-	-	-	-	-
miR-197-y	3.51233	0.2048	-4.10014	0.0013547	Unigene0003266	4.68583	9.4515	1.01224	8.1783e-05	0.00660656	--	myotubularin-related protein 10-b [Lasius niger]	-	-	-	-	-	-	-
miR-197-y	3.51233	0.2048	-4.10014	0.0013547	Unigene0003691	3.84043	9.05497	1.23744	1.01013e-06	0.000164166	GRIK2	PREDICTED: glutamate receptor ionotropic, kainate 2 isoform X2 [Tribolium castaneum]	-	-	-	-	GO:0031224//intrinsic component of membrane;GO:0097060//synaptic membrane	GO:0005231//excitatory extracellular ligand-gated ion channel activity	GO:0006811//ion transport;GO:0007215//glutamate receptor signaling pathway
miR-197-y	3.51233	0.2048	-4.10014	0.0013547	Unigene0003846	8.02523	25.2436	1.6533	4.33574e-10	1.51279e-07	Rasl11a	PREDICTED: ras-related and estrogen-regulated growth inhibitor [Neodiprion lecontei]	-	-	-	-	GO:0044464//cell part	GO:0032550//purine ribonucleoside binding	GO:0008104//protein localization;GO:0035556//intracellular signal transduction
miR-197-y	3.51233	0.2048	-4.10014	0.0013547	Unigene0004289	5.49617	11.8199	1.10472	5.52324e-05	0.00481781	--	PREDICTED: histone-lysine N-methyltransferase ash1 isoform X3 [Halyomorpha halys]	Metabolism	Amino acid metabolism	ko00310//Lysine degradation	K06101	GO:0043231//intracellular membrane-bounded organelle	GO:0016279//protein-lysine N-methyltransferase activity;GO:0046914//transition metal ion binding	GO:0016571//histone methylation
miR-197-y	3.51233	0.2048	-4.10014	0.0013547	Unigene0004316	12.5618	38.4676	1.6146	3.15188e-09	9.36508e-07	ARL4C	ADP-ribosylation factor-like protein 4A [Zootermopsis nevadensis]	-	-	-	-	-	-	-
miR-197-y	3.51233	0.2048	-4.10014	0.0013547	Unigene0004749	6.82943	14.5877	1.09491	8.03722e-06	0.000993711	dan	Protein distal antenna [Zootermopsis nevadensis]	-	-	-	-	-	-	-
miR-197-y	3.51233	0.2048	-4.10014	0.0013547	Unigene0006524	6.25787	32.7384	2.38724	2.34088e-06	0.000347517	--	--	-	-	-	-	-	-	-
miR-197-y	3.51233	0.2048	-4.10014	0.0013547	Unigene0007263	5.3711	11.285	1.07111	7.99372e-05	0.00649142	per	Period circadian protein [Zootermopsis nevadensis]	Organismal Systems	Environmental adaptation	ko04711//Circadian rhythm - fly	K02633	-	-	-
miR-197-y	3.51233	0.2048	-4.10014	0.0013547	Unigene0007992	11.0492	22.5135	1.02685	2.70308e-05	0.00272104	eRF1	Eukaryotic peptide chain release factor subunit 1 [Zootermopsis nevadensis]	Genetic Information Processing	Translation	ko03015//mRNA surveillance pathway	K03265	-	GO:0003747//translation release factor activity	GO:0043624//cellular protein complex disassembly
miR-197-y	3.51233	0.2048	-4.10014	0.0013547	Unigene0008491	1.04937	12.4363	3.56697	0.000319172	0.019008	Tmprss3	Prostasin [Zootermopsis nevadensis]	-	-	-	-	-	-	-
miR-197-y	3.51233	0.2048	-4.10014	0.0013547	Unigene0010941	2.24127	8.09233	1.85224	6.25871e-05	0.00532033	PXDN	PREDICTED: lactoperoxidase [Athalia rosae]	-	-	-	-	-	-	-
miR-197-y	3.51233	0.2048	-4.10014	0.0013547	Unigene0011328	6.8301	16.0096	1.22896	4.06453e-06	0.000557811	HMT-2	Homocysteine S-methyltransferase 2 [Zootermopsis nevadensis]	Metabolism	Amino acid metabolism;Global and overview maps	ko01100//Metabolic pathways;ko00270//Cysteine and methionine metabolism	K00547	-	-	-
miR-197-y	3.51233	0.2048	-4.10014	0.0013547	Unigene0011751	1.10223	8.57803	2.96022	8.58792e-08	1.84476e-05	--	PREDICTED: mucin-5AC [Apis florea]	-	-	-	-	-	-	-
miR-197-y	3.51233	0.2048	-4.10014	0.0013547	Unigene0012691	0.2206	0.684133	1.63284	2.15856e-05	0.00227099	tx	Helix-loop-helix protein delilah [Zootermopsis nevadensis]	-	-	-	-	-	-	-
miR-197-y	3.51233	0.2048	-4.10014	0.0013547	Unigene0013440	1.24943	19.8503	3.98981	2.32244e-35	1.91237e-31	RLBP1	Alpha-tocopherol transfer protein-like [Zootermopsis nevadensis]	-	-	-	-	-	-	-
miR-197-y	3.51233	0.2048	-4.10014	0.0013547	Unigene0013587	3.1894	10.5935	1.73182	2.49757e-11	1.12999e-08	--	Peptidyl-prolyl cis-trans isomerase SDCCAG10, partial [Zootermopsis nevadensis]	-	-	-	-	-	-	-
miR-197-y	3.51233	0.2048	-4.10014	0.0013547	Unigene0013982	20.6721	67.1745	1.70023	3.50716e-10	1.23768e-07	BNIP3	BCL2/adenovirus E1B 19 kDa protein-interacting protein 3-like [Zootermopsis nevadensis]	Cellular Processes;Environmental Information Processing	Signal transduction;Transport and catabolism	ko04140//Autophagy - animal ;ko04068//FoxO signaling pathway ;ko04137//Mitophagy - animal	K15464	GO:0031224//intrinsic component of membrane	-	GO:0042981//regulation of apoptotic process
miR-197-y	3.51233	0.2048	-4.10014	0.0013547	Unigene0014003	13.0964	27.5702	1.07394	4.07266e-05	0.0038051	celD	Endoglucanase F [Zootermopsis nevadensis]	Metabolism	Global and overview maps;Carbohydrate metabolism	ko01100//Metabolic pathways;ko00520//Amino sugar and nucleotide sugar metabolism ;ko00500//Starch and sucrose metabolism	K01179	GO:0031224//intrinsic component of membrane	GO:0004553//hydrolase activity, hydrolyzing O-glycosyl compounds	GO:0030243//cellulose metabolic process
miR-197-y	3.51233	0.2048	-4.10014	0.0013547	Unigene0015824	1.5256	3.11297	1.02891	0.000572294	0.029788	--	Leucine-rich repeat-containing protein [Zootermopsis nevadensis]	-	-	-	-	-	-	-
miR-197-y	3.51233	0.2048	-4.10014	0.0013547	Unigene0020303	0.441767	4.1329	3.2258	0.00038202	0.0219622	--	PREDICTED: LOW QUALITY PROTEIN: basic-leucine zipper transcription factor A-like [Apis mellifera]	-	-	-	-	-	-	-
miR-197-y	3.51233	0.2048	-4.10014	0.0013547	Unigene0032222	0.473233	1.47073	1.63591	5.47629e-05	0.00479261	--	hypothetical protein L798_06094 [Zootermopsis nevadensis]	-	-	-	-	-	-	-
miR-197-y	3.51233	0.2048	-4.10014	0.0013547	Unigene0035117	0.5986	1.2915	1.10938	0.000833385	0.0393334	CDC7	Cell division cycle 7-related protein kinase [Zootermopsis nevadensis]	-	-	-	-	-	-	-
miR-197-y	3.51233	0.2048	-4.10014	0.0013547	Unigene0040109	0.8119	1.666	1.03701	0.000993429	0.0443773	--	Rho GTPase-activating protein 11A [Zootermopsis nevadensis]	-	-	-	-	-	-	-
miR-197-y	3.51233	0.2048	-4.10014	0.0013547	Unigene0040536	0.174167	1.88803	3.43834	9.63266e-10	3.17274e-07	--	Natterin-3 [Zootermopsis nevadensis]	-	-	-	-	-	-	-
miR-197-y	3.51233	0.2048	-4.10014	0.0013547	Unigene0043778	9.98587	20.8732	1.06369	4.7265e-05	0.00427353	HLHmbeta	Enhancer of split mbeta protein [Zootermopsis nevadensis]	-	-	-	-	-	-	GO:0010467//gene expression;GO:0034645//cellular macromolecule biosynthetic process
miR-197-y	3.51233	0.2048	-4.10014	0.0013547	Unigene0047409	4.09213	8.36887	1.03218	5.81545e-05	0.00502305	Utp14b	U3 small nucleolar RNA-associated protein 14-like protein A [Zootermopsis nevadensis]	Genetic Information Processing	Translation	ko03008//Ribosome biogenesis in eukaryotes	K14567	-	-	-
miR-197-y	3.51233	0.2048	-4.10014	0.0013547	Unigene0047850	11.1763	61.633	2.46326	0.000220089	0.0143756	--	hypothetical protein [Coptotermes formosanus]	-	-	-	-	-	-	-
miR-197-y	3.51233	0.2048	-4.10014	0.0013547	Unigene0048996	14.4499	32.2593	1.15865	1.78378e-05	0.00192423	Spec2	CDC42 small effector protein-like protein [Zootermopsis nevadensis]	-	-	-	-	-	-	-
miR-197-y	3.51233	0.2048	-4.10014	0.0013547	Unigene0049610	0.0826	16.9744	7.68301	4.01104e-06	0.000551083	D11DS	PREDICTED: acyl-CoA Delta(11) desaturase-like [Copidosoma floridanum]	Metabolism;Organismal Systems	Lipid metabolism;Aging;Global and overview maps	ko04212//Longevity regulating pathway - worm ;ko01212//Fatty acid metabolism;ko01040//Biosynthesis of unsaturated fatty acids	K00507	-	GO:0016491//oxidoreductase activity	GO:0044710//single-organism metabolic process
miR-197-y	3.51233	0.2048	-4.10014	0.0013547	Unigene0049612	6.97003	39.4536	2.50092	8.99204e-18	1.12187e-14	--	Transcriptional regulator ICP4 domain-containing protein [Daphnia magna]	-	-	-	-	-	-	-
miR-197-y	3.51233	0.2048	-4.10014	0.0013547	Unigene0050100	3.063	26.2877	3.10137	8.28191e-05	0.00666514	--	chemosensory protein [Blattella germanica]	-	-	-	-	-	-	-
miR-197-y	3.51233	0.2048	-4.10014	0.0013547	Unigene0050593	3.99223	8.26323	1.04951	5.73321e-05	0.0049659	SLC4A10	Sodium-driven chloride bicarbonate exchanger [Zootermopsis nevadensis]	-	-	-	-	GO:0031224//intrinsic component of membrane	GO:0015301//anion:anion antiporter activity	GO:0006820//anion transport
miR-197-y	3.51233	0.2048	-4.10014	0.0013547	Unigene0050908	24.9074	99.1526	1.99307	1.29505e-14	1.01884e-11	--	Nuclear factor interleukin-3-regulated protein [Zootermopsis nevadensis]	Organismal Systems	Environmental adaptation	ko04711//Circadian rhythm - fly	K12114	-	-	-
miR-197-y	3.51233	0.2048	-4.10014	0.0013547	Unigene0051632	36.1932	107.896	1.57585	2.39977e-07	4.51153e-05	--	juvenile hormone binding protein domain protein [Coptotermes formosanus]	-	-	-	-	-	-	-
miR-197-y	3.51233	0.2048	-4.10014	0.0013547	Unigene0052303	8.92197	21.5162	1.26999	0.000410955	0.0231565	MMEL1	Membrane metallo-endopeptidase-like 1 [Zootermopsis nevadensis]	-	-	-	-	-	GO:0070011//peptidase activity, acting on L-amino acid peptides	GO:0019538//protein metabolic process
miR-197-y	3.51233	0.2048	-4.10014	0.0013547	Unigene0053166	4.05667	9.00323	1.15015	9.01312e-06	0.00108929	PLA2G3	PREDICTED: phospholipase A2-like [Cephus cinctus]	Metabolism	Global and overview maps;Lipid metabolism	ko01100//Metabolic pathways;ko00564//Glycerophospholipid metabolism ;ko00565//Ether lipid metabolism ;ko00590//Arachidonic acid metabolism ;ko00592//alpha-Linolenic acid metabolism ;ko00591//Linoleic acid metabolism	K01047	-	-	-
miR-197-y	3.51233	0.2048	-4.10014	0.0013547	Unigene0053437	44.0491	104.024	1.23973	1.29392e-06	0.000204906	Klf11	Krueppel-like factor 10 [Zootermopsis nevadensis]	-	-	-	-	-	-	-
miR-197-y	3.51233	0.2048	-4.10014	0.0013547	Unigene0055053	1.72343	10.7253	2.63767	3.18473e-22	6.7821e-19	amdhd1	PREDICTED: probable imidazolonepropionase [Parasteatoda tepidariorum]	Metabolism	Global and overview maps;Amino acid metabolism	ko01100//Metabolic pathways;ko00340//Histidine metabolism	K01468	-	-	-
miR-197-y	3.51233	0.2048	-4.10014	0.0013547	Unigene0055663	0.438067	5.18573	3.56533	0.000956884	0.0433475	--	PREDICTED: zinc finger CCCH domain-containing protein 4-like [Halyomorpha halys]	-	-	-	-	-	-	-
miR-197-y	3.51233	0.2048	-4.10014	0.0013547	Unigene0059582	0.4167	8.8134	4.40262	1.72048e-08	4.4738e-06	Sb	trypsin-7 [Nilaparvata lugens]	-	-	-	-	-	GO:0004175//endopeptidase activity	GO:0019538//protein metabolic process
miR-197-y	3.51233	0.2048	-4.10014	0.0013547	Unigene0059721	3.4873	23.7964	2.77056	1.06481e-14	8.43076e-12	--	AGAP002550-PA [Anopheles gambiae str. PEST] [Anopheles gambiae]	-	-	-	-	-	-	-
miR-197-y	3.51233	0.2048	-4.10014	0.0013547	Unigene0059825	0.8207	3.3537	2.03083	1.41701e-10	5.40191e-08	LCP17	PREDICTED: endocuticle structural glycoprotein SgAbd-2-like isoform X1 [Agrilus planipennis]	-	-	-	-	-	-	-
miR-197-y	3.51233	0.2048	-4.10014	0.0013547	Unigene0060907	83.0885	171.474	1.04527	2.91534e-05	0.0028872	MPDZ	PREDICTED: inaD-like protein [Bemisia tabaci]	-	-	-	-	-	-	-
miR-197-y	3.51233	0.2048	-4.10014	0.0013547	Unigene0062015	3.93237	8.3073	1.07898	2.52182e-05	0.00257636	Rsl1d1	Ribosomal L1 domain-containing protein 1 [Zootermopsis nevadensis]	-	-	-	-	-	-	-
miR-197-y	3.51233	0.2048	-4.10014	0.0013547	Unigene0062469	51.8015	110.257	1.0898	4.46762e-05	0.00408452	Sesn	Sestrin-like protein [Zootermopsis nevadensis]	-	-	-	-	-	-	GO:1902882//regulation of response to oxidative stress
miR-197-y	3.51233	0.2048	-4.10014	0.0013547	Unigene0064121	0.379367	1.09133	1.52443	0.000260329	0.0163056	CHIC2	PREDICTED: cysteine-rich hydrophobic domain-containing protein 2 [Neodiprion lecontei]	-	-	-	-	-	-	-
miR-197-y	3.51233	0.2048	-4.10014	0.0013547	Unigene0065114	2.15203	4.8902	1.18419	0.000106522	0.00809166	Sema5b	Semaphorin-5B [Zootermopsis nevadensis]	-	-	-	-	-	-	-
miR-197-y	3.51233	0.2048	-4.10014	0.0013547	Unigene0065410	11.3147	23.0624	1.02734	2.70927e-05	0.0027229	CdGAPr	PREDICTED: GTPase-activating protein CdGAPr isoform X1 [Cephus cinctus]	-	-	-	-	-	-	-
miR-197-y	3.51233	0.2048	-4.10014	0.0013547	Unigene0069724	3.40107	19.0303	2.48424	3.30332e-17	3.93256e-14	r	PREDICTED: CAD protein [Athalia rosae]	Metabolism	Amino acid metabolism;Global and overview maps;Nucleotide metabolism	ko01100//Metabolic pathways;ko00240//Pyrimidine metabolism ;ko00250//Alanine, aspartate and glutamate metabolism	K11540	-	-	-
miR-197-y	3.51233	0.2048	-4.10014	0.0013547	Unigene0069758	4.47567	9.00657	1.00887	5.07922e-05	0.00451338	abcb6	ATP-binding cassette sub-family B member 6, mitochondrial [Zootermopsis nevadensis]	Environmental Information Processing	Membrane transport	ko02010//ABC transporters	K05661	-	-	-
miR-197-y	3.51233	0.2048	-4.10014	0.0013547	Unigene0070009	1.98873	4.4343	1.15686	2.97923e-05	0.00292952	SUCLG2	Succinyl-CoA ligase [GDP-forming] subunit beta, mitochondrial [Zootermopsis nevadensis]	Metabolism	Global and overview maps;Carbohydrate metabolism	ko01100//Metabolic pathways;ko01200//Carbon metabolism;ko00020//Citrate cycle (TCA cycle) ;ko00640//Propanoate metabolism	K01900	-	-	-
miR-197-y	3.51233	0.2048	-4.10014	0.0013547	Unigene0070492	5.088	10.698	1.07217	4.96891e-05	0.00444413	ASH1L	PREDICTED: histone-lysine N-methyltransferase ash1 isoform X2 [Cimex lectularius]	Metabolism	Amino acid metabolism	ko00310//Lysine degradation	K06101	-	GO:0005488//binding;GO:0016740//transferase activity	-
miR-197-y	3.51233	0.2048	-4.10014	0.0013547	Unigene0070778	0.366167	53.1106	7.18036	7.26372e-06	0.000911973	--	osiris 19 [Danaus plexippus]	-	-	-	-	-	-	-
miR-197-y	3.51233	0.2048	-4.10014	0.0013547	Unigene0072595	4.10717	10.4111	1.34191	0.000149475	0.0106167	IL16	Pro-interleukin-16 [Zootermopsis nevadensis]	-	-	-	-	-	-	-
miR-197-y	3.51233	0.2048	-4.10014	0.0013547	Unigene0073996	3.79303	13.8296	1.86633	2.57233e-06	0.000377341	--	PREDICTED: mucin-5AC [Linepithema humile]	-	-	-	-	-	-	-
miR-197-y	3.51233	0.2048	-4.10014	0.0013547	Unigene0077578	8.30903	26.3475	1.66491	2.44702e-08	6.02078e-06	PSME3	Proteasome activator complex subunit 3 [Zootermopsis nevadensis]	Genetic Information Processing	Folding, sorting and degradation	ko03050//Proteasome	K06698	-	-	-
miR-197-y	3.51233	0.2048	-4.10014	0.0013547	Unigene0078427	1.59387	4.2131	1.40235	9.09668e-07	0.000149412	RWDD2A	RWD domain-containing protein 2A [Zootermopsis nevadensis]	-	-	-	-	-	-	-
miR-199-x	29.0441	4.70313	-2.62655	0.00141097	Unigene0000205	0.0291	48.7056	10.7089	8.08929e-05	0.00655179	--	Retrovirus-related Pol polyprotein from type-1 retrotransposable element [Trichinella patagoniensis]	-	-	-	-	-	-	-
miR-199-x	29.0441	4.70313	-2.62655	0.00141097	Unigene0001076	1.12863	2.56927	1.18678	0.000190851	0.0128184	--	hypothetical protein L798_10476 [Zootermopsis nevadensis]	-	-	-	-	-	-	-
miR-199-x	29.0441	4.70313	-2.62655	0.00141097	Unigene0004458	7.1191	26.5809	1.90062	1.06533e-09	3.49029e-07	--	enzymatic polyprotein endonuclease reverse [Lasius niger]	-	-	-	-	-	-	-
miR-199-x	29.0441	4.70313	-2.62655	0.00141097	Unigene0004749	6.82943	14.5877	1.09491	8.03722e-06	0.000993711	dan	Protein distal antenna [Zootermopsis nevadensis]	-	-	-	-	-	-	-
miR-199-x	29.0441	4.70313	-2.62655	0.00141097	Unigene0005553	1.73357	4.47997	1.36974	8.2194e-06	0.00101218	--	hypothetical protein g.3467, partial [Graphocephala atropunctata]	-	-	-	-	-	-	-
miR-199-x	29.0441	4.70313	-2.62655	0.00141097	Unigene0005883	2.68907	7.08373	1.3974	3.80274e-07	6.89714e-05	--	Retrovirus-related Pol polyprotein from transposon TNT 1-94 [Trichinella sp. T8]	-	-	-	-	-	-	-
miR-199-x	29.0441	4.70313	-2.62655	0.00141097	Unigene0007992	11.0492	22.5135	1.02685	2.70308e-05	0.00272104	eRF1	Eukaryotic peptide chain release factor subunit 1 [Zootermopsis nevadensis]	Genetic Information Processing	Translation	ko03015//mRNA surveillance pathway	K03265	-	GO:0003747//translation release factor activity	GO:0043624//cellular protein complex disassembly
miR-199-x	29.0441	4.70313	-2.62655	0.00141097	Unigene0008504	0.2728	5.40907	4.30946	2.21303e-08	5.51094e-06	--	Stress protein DDR48 [Zootermopsis nevadensis]	-	-	-	-	-	-	-
miR-199-x	29.0441	4.70313	-2.62655	0.00141097	Unigene0008530	7.802	18.7979	1.26866	7.80342e-07	0.000130249	SETMAR	transposase, partial [Trimerotropis pallidipennis]	Metabolism	Global and overview maps;Metabolism of cofactors and vitamins	ko01100//Metabolic pathways;ko00760//Nicotinate and nicotinamide metabolism	K00858	-	-	-
miR-199-x	29.0441	4.70313	-2.62655	0.00141097	Unigene0009649	3.8832	8.68497	1.16127	1.74338e-05	0.00188228	--	PREDICTED: MATH and LRR domain-containing protein PFE0570w-like [Camponotus floridanus]	-	-	-	-	-	-	-
miR-199-x	29.0441	4.70313	-2.62655	0.00141097	Unigene0011460	4.35247	10.3797	1.25386	3.05522e-06	0.000438288	mex3b	RNA-binding protein MEX3B [Zootermopsis nevadensis]	-	-	-	-	-	-	-
miR-199-x	29.0441	4.70313	-2.62655	0.00141097	Unigene0011525	14.6845	33.7571	1.20089	3.23821e-06	0.000458678	Zc2hc1b	PREDICTED: zinc finger C2HC domain-containing protein 1C-like [Aethina tumida]	-	-	-	-	-	-	-
miR-199-x	29.0441	4.70313	-2.62655	0.00141097	Unigene0011751	1.10223	8.57803	2.96022	8.58792e-08	1.84476e-05	--	PREDICTED: mucin-5AC [Apis florea]	-	-	-	-	-	-	-
miR-199-x	29.0441	4.70313	-2.62655	0.00141097	Unigene0012597	10.9679	33.9444	1.62988	5.71166e-06	0.000746535	--	soldier-specific protein-1 [Nasutitermes takasagoensis]	-	-	-	-	-	-	-
miR-199-x	29.0441	4.70313	-2.62655	0.00141097	Unigene0013931	1.71107	3.59933	1.07283	0.000162093	0.011305	Mus81	Crossover junction endonuclease MUS81 [Zootermopsis nevadensis]	Genetic Information Processing	Replication and repair	ko03460//Fanconi anemia pathway ;ko03440//Homologous recombination	K08991	-	-	-
miR-199-x	29.0441	4.70313	-2.62655	0.00141097	Unigene0013956	0.2329	3.49627	3.90803	2.80967e-13	1.70116e-10	Pxt	PREDICTED: chorion peroxidase [Neodiprion lecontei]	-	-	-	-	-	GO:0003824//catalytic activity;GO:0046906//tetrapyrrole binding	GO:0006950//response to stress;GO:0044710//single-organism metabolic process
miR-199-x	29.0441	4.70313	-2.62655	0.00141097	Unigene0014042	0.0137	3.87963	8.1456	0.000279241	0.0171509	--	AGAP013195-PA [Anopheles gambiae str. PEST] [Anopheles gambiae]	-	-	-	-	-	-	-
miR-199-x	29.0441	4.70313	-2.62655	0.00141097	Unigene0043439	3.3603	8.70217	1.37278	1.19533e-06	0.00019075	ski	Ski oncogene [Zootermopsis nevadensis]	-	-	-	-	-	-	-
miR-199-x	29.0441	4.70313	-2.62655	0.00141097	Unigene0043778	9.98587	20.8732	1.06369	4.7265e-05	0.00427353	HLHmbeta	Enhancer of split mbeta protein [Zootermopsis nevadensis]	-	-	-	-	-	-	GO:0010467//gene expression;GO:0034645//cellular macromolecule biosynthetic process
miR-199-x	29.0441	4.70313	-2.62655	0.00141097	Unigene0043816	0.3842	1.3659	1.82992	3.36112e-05	0.00324335	--	RT08035p, partial [Drosophila melanogaster]	-	-	-	-	-	-	-
miR-199-x	29.0441	4.70313	-2.62655	0.00141097	Unigene0045451	0.108367	11.476	6.72656	4.70773e-05	0.00426302	--	Cuticlin-1 [Zootermopsis nevadensis]	-	-	-	-	-	-	-
miR-199-x	29.0441	4.70313	-2.62655	0.00141097	Unigene0047850	11.1763	61.633	2.46326	0.000220089	0.0143756	--	hypothetical protein [Coptotermes formosanus]	-	-	-	-	-	-	-
miR-199-x	29.0441	4.70313	-2.62655	0.00141097	Unigene0048153	1.84653	3.99657	1.11394	0.000115047	0.00862675	--	PREDICTED: transcription factor Adf-1-like [Acyrthosiphon pisum]	-	-	-	-	-	-	-
miR-199-x	29.0441	4.70313	-2.62655	0.00141097	Unigene0048675	0.1957	6.02907	4.94522	0.000229759	0.0148813	--	PREDICTED: chondroitin proteoglycan 1-like [Agrilus planipennis]	-	-	-	-	-	-	-
miR-199-x	29.0441	4.70313	-2.62655	0.00141097	Unigene0049612	6.97003	39.4536	2.50092	8.99204e-18	1.12187e-14	--	Transcriptional regulator ICP4 domain-containing protein [Daphnia magna]	-	-	-	-	-	-	-
miR-199-x	29.0441	4.70313	-2.62655	0.00141097	Unigene0049626	6.91757	39.3739	2.5089	6.51339e-05	0.00550274	--	hypothetical protein L798_12569 [Zootermopsis nevadensis]	-	-	-	-	-	-	-
miR-199-x	29.0441	4.70313	-2.62655	0.00141097	Unigene0050110	3.33627	6.94707	1.05817	6.9947e-05	0.00583814	PRMT3	Protein arginine N-methyltransferase 3 [Zootermopsis nevadensis]	-	-	-	-	-	-	-
miR-199-x	29.0441	4.70313	-2.62655	0.00141097	Unigene0050159	0.911867	1.97053	1.11169	0.000383318	0.0220007	HLHmgamma	Enhancer of split mgamma protein [Zootermopsis nevadensis]	-	-	-	-	-	-	GO:0010467//gene expression;GO:0034645//cellular macromolecule biosynthetic process
miR-199-x	29.0441	4.70313	-2.62655	0.00141097	Unigene0050233	0.0829	7.8928	6.57302	5.46085e-06	0.00071755	Sb	Serine proteinase stubble [Zootermopsis nevadensis]	-	-	-	-	-	-	-
miR-199-x	29.0441	4.70313	-2.62655	0.00141097	Unigene0051074	8.0671	27.1598	1.75135	7.38522e-09	2.03159e-06	--	Solute carrier family 2, facilitated glucose transporter member 6, partial [Zootermopsis nevadensis]	-	-	-	-	-	-	-
miR-199-x	29.0441	4.70313	-2.62655	0.00141097	Unigene0051581	0.2836	1.12937	1.99358	7.24011e-06	0.000910654	--	DNA polymerase V [Zootermopsis nevadensis]	-	-	-	-	-	-	-
miR-199-x	29.0441	4.70313	-2.62655	0.00141097	Unigene0051718	10.9301	28.9282	1.40417	1.10014e-07	2.29534e-05	ITIH4	PREDICTED: inter-alpha-trypsin inhibitor heavy chain H4-like [Halyomorpha halys]	-	-	-	-	-	-	-
miR-199-x	29.0441	4.70313	-2.62655	0.00141097	Unigene0051736	4.77793	22.4584	2.2328	9.44148e-15	7.62199e-12	hes4-a	Transcription factor HES-4-A [Zootermopsis nevadensis]	-	-	-	-	-	-	-
miR-199-x	29.0441	4.70313	-2.62655	0.00141097	Unigene0052207	6.2589	20.5978	1.71851	7.44855e-11	3.02634e-08	AGPAT1	1-acyl-sn-glycerol-3-phosphate acyltransferase alpha [Zootermopsis nevadensis]	Metabolism	Lipid metabolism;Global and overview maps	ko01100//Metabolic pathways;ko00564//Glycerophospholipid metabolism ;ko00561//Glycerolipid metabolism	K13509	-	GO:0016740//transferase activity	GO:0006629//lipid metabolic process
miR-199-x	29.0441	4.70313	-2.62655	0.00141097	Unigene0052303	8.92197	21.5162	1.26999	0.000410955	0.0231565	MMEL1	Membrane metallo-endopeptidase-like 1 [Zootermopsis nevadensis]	-	-	-	-	-	GO:0070011//peptidase activity, acting on L-amino acid peptides	GO:0019538//protein metabolic process
miR-199-x	29.0441	4.70313	-2.62655	0.00141097	Unigene0052415	3.61913	11.818	1.70727	0.000406798	0.0230802	Gnpda1	PREDICTED: glucosamine-6-phosphate isomerase isoform X2 [Cephus cinctus]	Metabolism	Carbohydrate metabolism;Global and overview maps	ko01100//Metabolic pathways;ko00520//Amino sugar and nucleotide sugar metabolism	K02564	GO:0044424//intracellular part	GO:0003824//catalytic activity	GO:0044238//primary metabolic process;GO:1901071//glucosamine-containing compound metabolic process
miR-199-x	29.0441	4.70313	-2.62655	0.00141097	Unigene0052432	2.62433	6.2716	1.25688	3.58852e-06	0.000501966	Rrp9	U3 small nucleolar RNA-interacting protein 2 [Zootermopsis nevadensis]	-	-	-	-	-	-	-
miR-199-x	29.0441	4.70313	-2.62655	0.00141097	Unigene0052670	0.79	3.35567	2.08667	1.46775e-07	2.92402e-05	Abhd3	Abhydrolase domain-containing protein 3 [Zootermopsis nevadensis]	-	-	-	-	-	-	-
miR-199-x	29.0441	4.70313	-2.62655	0.00141097	Unigene0053514	12.8588	32.1893	1.32382	0.000344697	0.0202643	--	DNA topoisomerase 2-alpha [Orchesella cincta]	-	-	-	-	-	-	-
miR-199-x	29.0441	4.70313	-2.62655	0.00141097	Unigene0055053	1.72343	10.7253	2.63767	3.18473e-22	6.7821e-19	amdhd1	PREDICTED: probable imidazolonepropionase [Parasteatoda tepidariorum]	Metabolism	Global and overview maps;Amino acid metabolism	ko01100//Metabolic pathways;ko00340//Histidine metabolism	K01468	-	-	-
miR-199-x	29.0441	4.70313	-2.62655	0.00141097	Unigene0055459	1.01217	9.84203	3.28151	4.42427e-05	0.00405991	KLKB1	seminal fluid protein CSSFP033 [Chilo suppressalis]	-	-	-	-	-	-	-
miR-199-x	29.0441	4.70313	-2.62655	0.00141097	Unigene0055471	9.76947	21.0043	1.10433	4.37199e-05	0.00402089	PDPK1	3-phosphoinositide-dependent protein kinase 1 [Zootermopsis nevadensis]	Cellular Processes;Environmental Information Processing	Signal transduction;Transport and catabolism	ko04140//Autophagy - animal ;ko04150//mTOR signaling pathway ;ko04068//FoxO signaling pathway	K06276	-	GO:0004672//protein kinase activity	-
miR-199-x	29.0441	4.70313	-2.62655	0.00141097	Unigene0055663	0.438067	5.18573	3.56533	0.000956884	0.0433475	--	PREDICTED: zinc finger CCCH domain-containing protein 4-like [Halyomorpha halys]	-	-	-	-	-	-	-
miR-199-x	29.0441	4.70313	-2.62655	0.00141097	Unigene0056609	4.4568	10.9774	1.30046	1.29473e-05	0.00146876	--	PREDICTED: sodium channel protein Nach-like [Cimex lectularius]	-	-	-	-	-	-	-
miR-199-x	29.0441	4.70313	-2.62655	0.00141097	Unigene0057020	42.3286	89.9525	1.08753	1.28813e-05	0.00146639	--	PREDICTED: ras guanine nucleotide exchange factor P-like [Diaphorina citri]	-	-	-	-	-	-	-
miR-199-x	29.0441	4.70313	-2.62655	0.00141097	Unigene0057853	12.0515	30.0889	1.32001	5.10367e-06	0.000674925	sbk1	Serine/threonine-protein kinase SBK1 [Zootermopsis nevadensis]	-	-	-	-	-	-	-
miR-199-x	29.0441	4.70313	-2.62655	0.00141097	Unigene0059582	0.4167	8.8134	4.40262	1.72048e-08	4.4738e-06	Sb	trypsin-7 [Nilaparvata lugens]	-	-	-	-	-	GO:0004175//endopeptidase activity	GO:0019538//protein metabolic process
miR-199-x	29.0441	4.70313	-2.62655	0.00141097	Unigene0060530	1.13893	2.85417	1.32539	7.73989e-06	0.000962731	NINJ2	PREDICTED: ninjurin-2-like isoform X3 [Anoplophora glabripennis]	-	-	-	-	-	-	-
miR-199-x	29.0441	4.70313	-2.62655	0.00141097	Unigene0064382	13.9801	40.2775	1.5266	2.32694e-09	7.1318e-07	tubb1	beta-tubulin 4 [Nilaparvata lugens]	Cellular Processes	Transport and catabolism	ko04145//Phagosome	K07375	-	-	-
miR-199-x	29.0441	4.70313	-2.62655	0.00141097	Unigene0067549	4.38553	11.249	1.35897	7.44544e-08	1.63054e-05	KEAP1	Kelch-like ECH-associated protein 1 [Zootermopsis nevadensis]	Genetic Information Processing	Folding, sorting and degradation	ko04120//Ubiquitin mediated proteolysis	K10456	-	-	-
miR-199-x	29.0441	4.70313	-2.62655	0.00141097	Unigene0067588	1.17457	3.73193	1.66779	2.2799e-07	4.325e-05	Ush1g	PREDICTED: Usher syndrome type-1G protein homolog isoform X1 [Athalia rosae]	-	-	-	-	-	-	-
miR-199-x	29.0441	4.70313	-2.62655	0.00141097	Unigene0067793	4.89853	21.5688	2.13852	4.59066e-14	3.22168e-11	Suco	PREDICTED: SUN domain-containing ossification factor [Camponotus floridanus]	-	-	-	-	-	-	-
miR-199-x	29.0441	4.70313	-2.62655	0.00141097	Unigene0069361	0.0281333	30.6616	10.0899	2.92265e-05	0.00288793	--	--	-	-	-	-	-	-	-
miR-199-x	29.0441	4.70313	-2.62655	0.00141097	Unigene0069695	5.3891	14.541	1.43201	2.66275e-07	4.96813e-05	CNPY2	Canopy-like protein 2 [Zootermopsis nevadensis]	-	-	-	-	-	-	-
miR-199-x	29.0441	4.70313	-2.62655	0.00141097	Unigene0069724	3.40107	19.0303	2.48424	3.30332e-17	3.93256e-14	r	PREDICTED: CAD protein [Athalia rosae]	Metabolism	Amino acid metabolism;Global and overview maps;Nucleotide metabolism	ko01100//Metabolic pathways;ko00240//Pyrimidine metabolism ;ko00250//Alanine, aspartate and glutamate metabolism	K11540	-	-	-
[truncated: 2,707 more rows]
